# Supplementary material for: Mastitomics, the integrated omics of bovine milk in an experimental model of Streptococcus uberis mastitis: 2. Label-free relative quantitative proteomics
Source: Royal Society of Chemistry journal article supplement (doi:10.1039/c6mb00290k), 2016-07-14
Supplement: c6mb00290k1.zip [file ESI_Figure_S1.docx]

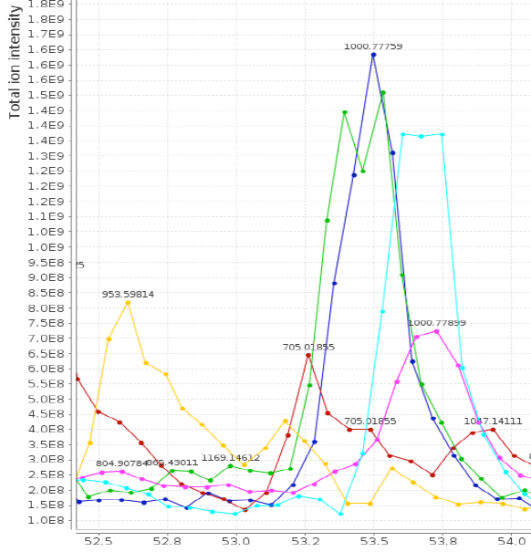

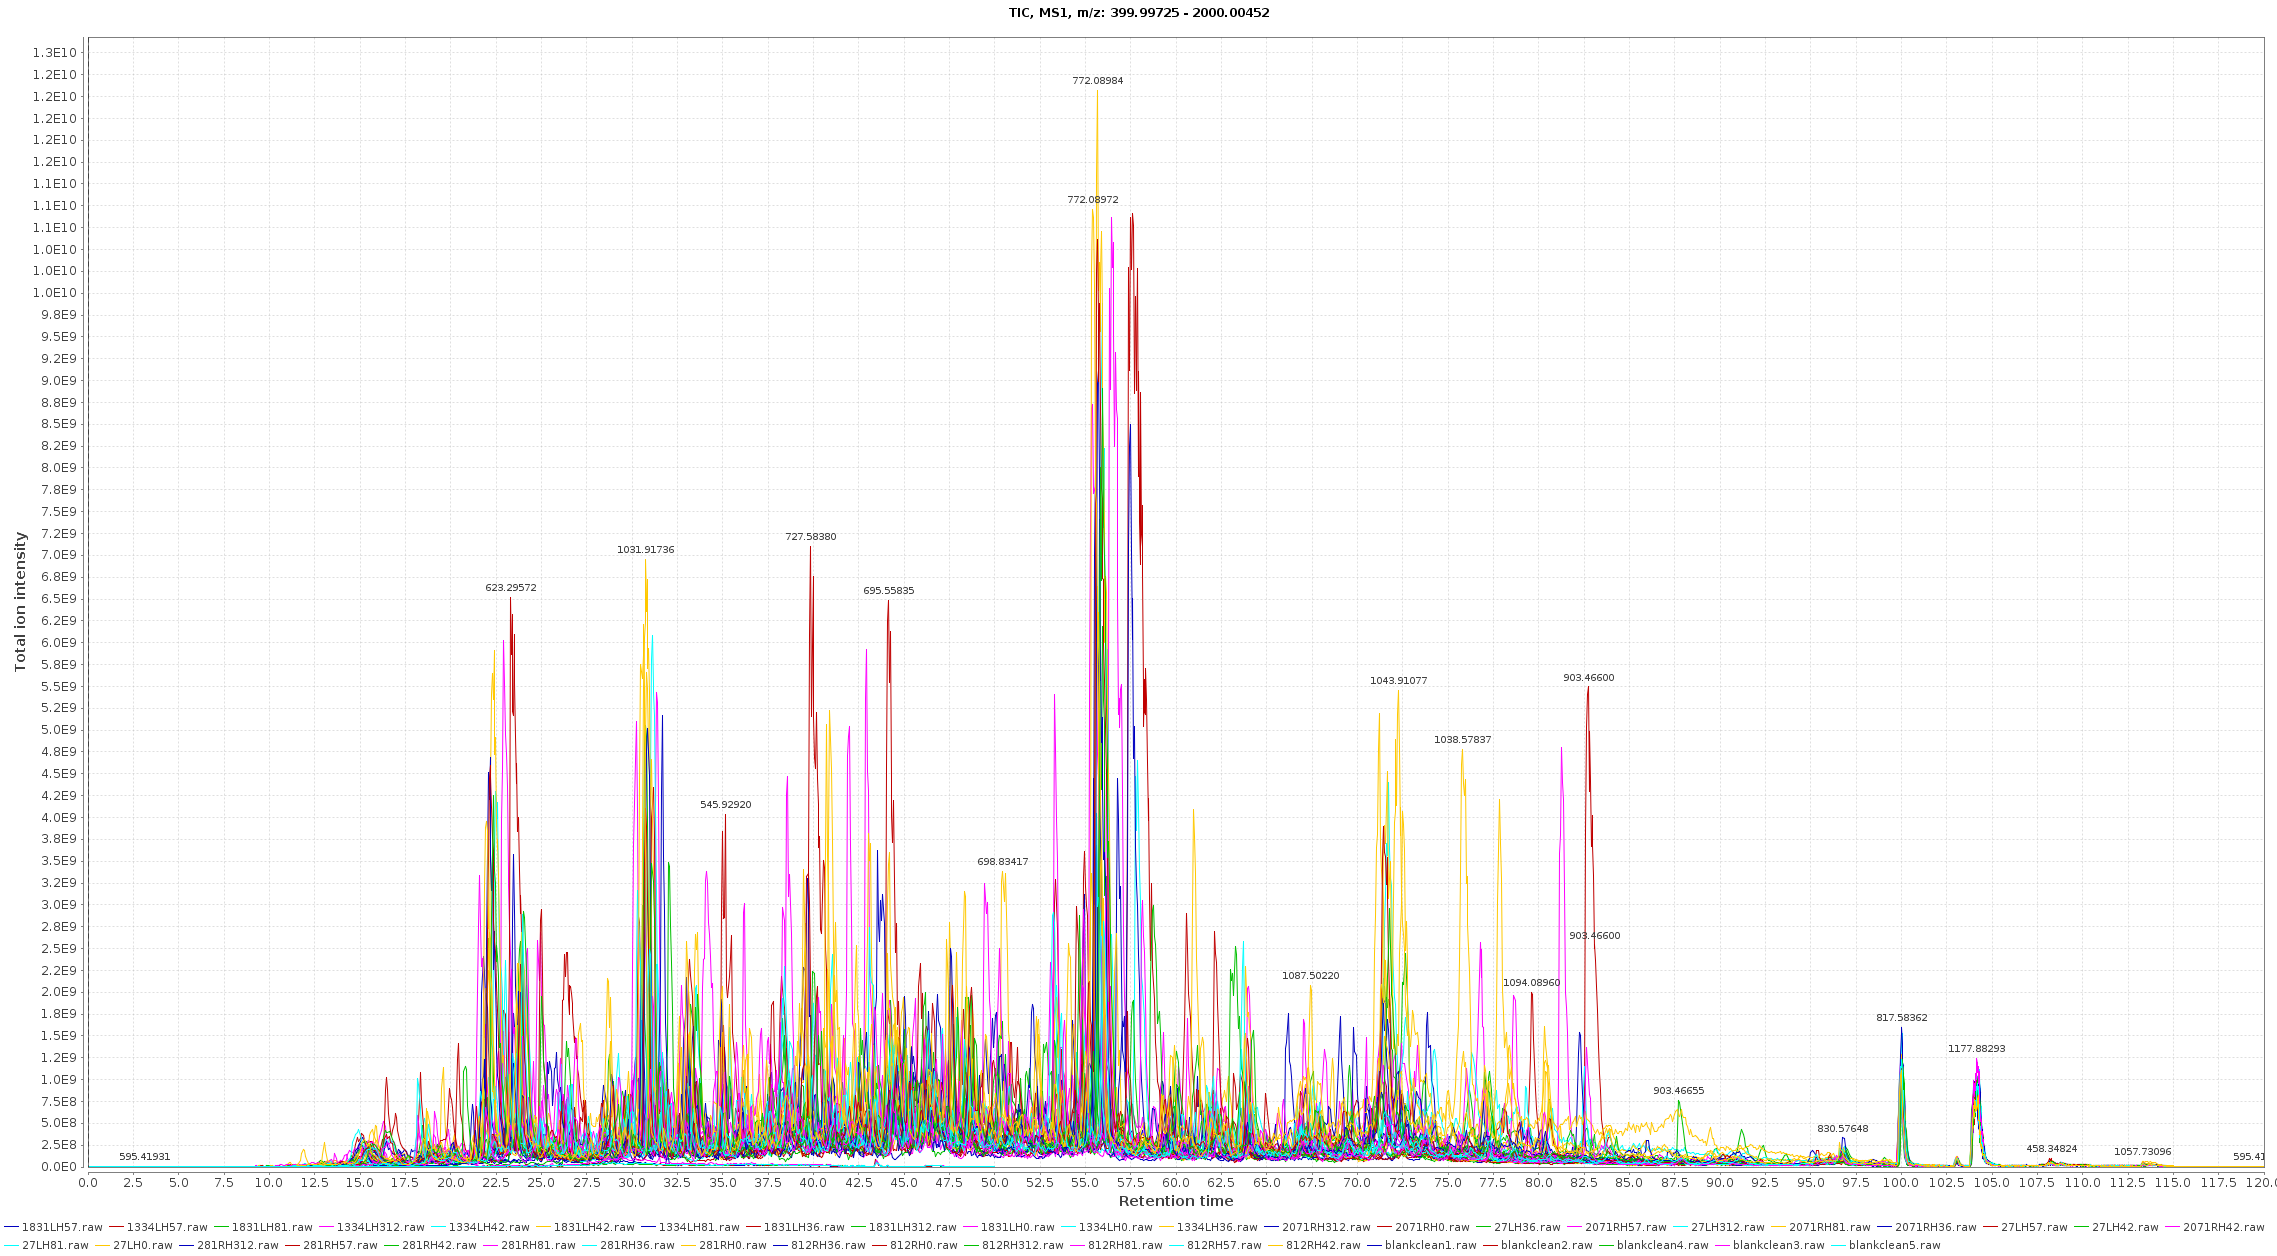


**Figure S1.** Total ion current (TIC) chromatograms for proteomic analysis of whey derived from an experimental challenge model of *Streptococcus uberis* mastitis in cattle. Colours represent individual samples, which include 6 times points from 6 cows and blanks. Inset shows a zoomed two-minute section indicating retention time drift, which was less than 2 minutes.
