# Supplementary material for: Mastitomics, the integrated omics of bovine milk in an experimental model of Streptococcus uberis mastitis: 2. Label-free relative quantitative proteomics
Source: Royal Society of Chemistry journal article supplement (doi:10.1039/c6mb00290k), 2016-07-14
Supplement: c6mb00290k1.zip [file ESI_Table_S1.xlsx]

## Sheet: Legend
Column header	Explanation
A Count	The number of instances of the 'A' amino acid (Alanine) contained within the sequence.
Amino acid after	The amino acid in the protein sequence after the peptide
Amino acid before	The amino acid in the protein sequence before the peptide
Best MS/MS	The identifier of the best (in terms of quality) MS/MS scan identifying this peptide, referenced against the msms table
C Count	The number of instances of the 'C' amino acid (Cysteine) contained within the sequence.
Charges	All charge states that have been observed
C-term cleavage window	Sequence window from -8 to 8 around the C-terminal cleavage site of this peptide
D Count	The number of instances of the 'D' amino acid (Aspartic Acid) contained within the sequence
Deamidation (NQ) site IDs	Identifier(s) for site(s) associated with the protein group, which show(s) evidence of the modification, referenced against the appropriate modification site file.
Deamidation NQ site positions	Positions of the sites in the leading protein of this group
E Count	The number of instances of the 'E' amino acid (Glutamic Acid) contained within the sequence
End position	Position of the last amino acid of this peptide in the protein sequence. (one-based)
Evidence IDs	Identifier(s) for analyzed peptide evidence associated with the protein group referenced against the evidences table
Experiment xxxLHy	Number of evidence entries for cow number xxxx, left hind quarter, at y hours post challenge (PC), whereby 27 = cow 1; 281 = cow 2; 1334 = cow 3; 2071 = cow 4; 812 = cow 5; and 1831 = cow 6 in the main text and figures
Experiment xxxRFy	Number of evidence entries for cow number xxxx, right front quarter, at y hours post challenge (PC), whereby 27 = cow 1; 281 = cow 2; 1334 = cow 3; 2071 = cow 4; 812 = cow 5; and 1831 = cow 6 in the main text and figures
Experiment blankcleanz	Number of evidence entries for blank run z
Experiment xxxLFy	Number of evidence entries for cow number xxxx, left front quarter, at y hours post challenge (PC), whereby 27 = cow 1; 281 = cow 2; 1334 = cow 3; 2071 = cow 4; 812 = cow 5; and 1831 = cow 6 in the main text and figures
Experiment xxxRHy	Number of evidence entries for cow number xxxx, right hind quarter, at y hours post challenge (PC), whereby 27 = cow 1; 281 = cow 2; 1334 = cow 3; 2071 = cow 4; 812 = cow 5; and 1831 = cow 6 in the main text and figures
F Count	The number of instances of the 'F' amino acid (Phenylalanine) contained within the sequence
Fasta headers	Fasta headers(s) of protein(s) contained within the group
First amino acid	The amino acid in the first position of the peptide seqeunce
G Count	The number of instances of the 'G' amino acid (Glycine) contained within the sequence
H Count	The number of instances of the 'H' amino acid (Histidine) contained within the sequence
I Count	The number of instances of the 'I' amino acid (Isoleucine) contained within the sequence
iBAQ	Intensity based absolute quantification
id	A unique (consecutive) identifier for each row in the peptides table, which is used to cross-link the information in this table with the information stored in the other tables
Identification type	Indicates whether this experiment was identified by MS/MS or only by matching between runs; Matching = identification based on matching; MS/MS = identification based on mass spectrometry
Identification type blankcleanz	Indicates whether this experiment was identified by MS/MS or only by matching between runs; Identification type for blank number z, with blanks run after every 6 whey samples
Identification type xxxLFy	Indicates whether this experiment was identified by MS/MS or only by matching between runs; Identification type for cow number xxxx, left front quarter, at y hours post challenge (PC)
Identification type xxxLHy	Indicates whether this experiment was identified by MS/MS or only by matching between runs; Identification type for cow number xxxx, left hind quarter, at y hours post challenge (PC), whereby 27 = cow 1; 281 = cow 2; 1334 = cow 3; 2071 = cow 4; 812 = cow 5; and 1831 = cow 6 in the main text and figures
Identification type xxxRFy	Indicates whether this experiment was identified by MS/MS or only by matching between runs; Identification type for cow number xxxx, right front quarter, at y hours post challenge (PC)
Identification type xxxRHy	Indicates whether this experiment was identified by MS/MS or only by matching between runs; Identification type for cow number xxxx, right hind quarter, at y hours post challenge (PC)
Intensity	Summed up eXtracted Ion Current (XIC) of all isotopic clusters associated with the identified AA sequence. In case of a labeled experiment this is the total intensity of all the isotopic patterns in the label cluster
K Count	The number of instances of the 'K' amino acid (Lysine) contained within the sequence
L Count	The number of instances of the 'L' amino acid (Leucine) contained within the sequence
Last amino acid	The amino acid in the last position of the peptide seqeunce
Leading razor protein	Identifiers of the best scoring protein this peptide is associated with.
Length	The length of the sequence stored in the column "Sequence"
LFQ intensity	The output of the MaxLFQ algorithm (Cox et al., MCP, 2014). They are based on the (raw) intensities and normalized on multiple levels to ensure that profiles of LFQ intensities across samples accurately reflect the relative amounts of the proteins
M Count	The number of instances of the 'M' amino acid (Methionine) contained within the sequence
Majority protein IDs	These are the IDs of those proteins that have at least half of the peptides that the leading protein has
Mass	The predicted monoisotopic mass of the identified peptide sequence
Missed cleavages	Number of missed enzymatic cleavages.
Mod. peptide IDs	Identifier(s) for peptide sequence(s), associated with the peptide, referenced against the corresponding modified peptides table.
Mol weight kDa	Molecular weight of the leading protein sequence contained in the protein group
MS/MS Count	The number of sequencing events for this sequence, which matches the number of identifiers stored in the column ‘MS/MS IDs’. This number is independent of the times the AA sequence has been identified through (other) modifications (e.g. heavy label, oxidation, etc.)
MS/MS IDs	The identifiers of the MS/MS scans identifying this peptide, referenced against the msms table
N Count	The number of instances of the 'N' amino acid (Asparagine) contained within the sequence
N-term cleavage window	Sequence window from -8 to 8 around the N-terminal cleavage site of this peptide.
Number of proteins	Number of proteins contained within the group. This corresponds to the number of entries in the colum 'Protein IDs'.
Only identified by site	When marked with '+', this particular protein group was identified only by a modification site
Oxidation (M) site IDs	Identifier(s) of the modification summary stored in the file 'Oxidation (M)Sites.txt'.
Oxidation M site positions	Positions of the sites in the leading protein of this group.
P Count	The number of instances of the 'P' amino acid (Proline) contained within the sequence
PEP	Posterior Error Probability of the identification. This value essentially operates as a p-value, where smaller is more significant.
Peptide counts all	Number of peptides associated with each protein in protein group, occuring in the order as the protein IDs occur in the 'Protein IDs' column. Here distinct peptide sequences are counted. Modified forms or different charges are counted as one peptide.
Peptide counts (razor+unique)	Number of peptides associated with each protein in protein group, occuring in the order as the protein IDs occur in the 'Protein IDs' column. Here distinct peptide sequences are counted. Modified forms or different charges are counted as one peptide.
Peptide counts unique	Number of peptides associated with each protein in protein group, occuring in the order as the protein IDs occur in the 'Protein IDs' column. Here distinct peptide sequences are counted. Modified forms or different charges are counted as one peptide.
Peptide IDs	The identifier of the non-redundant peptide sequence.
Peptide is razor	Indicates for each peptide ID if it is a razor or group unique peptide (true) or a non unique non razor peptide (false).
Peptides	Number of peptides (distinct peptide sequences) in experiment
Peptides blankclean1	Peptides for blank number z, with blanks run after every 6 whey samples
Peptides xxxxLFy	Peptides for cow number xxxx, left front quarter, at y hours post challenge (PC)
Peptides xxxxLHy	Peptides for cow number xxxx, left hind quarter, at y hours post challenge (PC), whereby 27 = cow 1; 281 = cow 2; 1334 = cow 3; 2071 = cow 4; 812 = cow 5; and 1831 = cow 6 in the main text and figures
Peptides xxxxRFy	Peptides for cow number xxxx, right front quarter, at y hours post challenge (PC)
Peptides xxxxRHy	Peptides for cow number xxxx, right hind quarter, at y hours post challenge (PC)
Potential contaminant	When marked with '+', this particular peptide was found to be part of a commonly occurring contaminant. These should be removed for further data analysis.
Protein group IDs	The identifier of the protein-group this redundant peptide sequence is associated with, which can be used to look up the extended protein information in the file 'proteinGroups.txt'. As a single peptide can be linked to multiple proteins (e.g. in the case of razor-proteins), multiple id’s can be stored here separated by a semicolon. As a protein can be identified by multiple peptides, the same id…
Protein IDs	Identifier(s) of protein(s) contained in the protein group. They are sorted by number of identified peptides in descending order.
Proteins	Identifiers of proteins this peptide is associated with
Q Count	The number of instances of the 'Q' amino acid (Glutamine) contained within the sequence
Q value	This is the ratio of reverse to forward protein groups.
R Count	The number of instances of the 'R' amino acid (Arginine) contained within the sequence
Razor + unique peptides	The total number of razor + unique peptides associated with the protein group (i.e. these peptides are shared with another protein group).
Reverse	When marked with '+', this particular protein group contains no protein, made up of at least 50% of the peptides of the leading protein, with a peptide derived from the reversed part of the decoy database. These should be removed for further data analysis. The 50% rule is in place to prevent spurious protein hits to erroneously flag the protein group as reverse.
S Count	The number of instances of the 'S' amino acid (Serine) contained within the sequence
Score	Protein score which is derived from peptide posterior error probabilities
Second amino acid	The amino acid in the first position of the peptide sequence
Second last amino acid	The amino acid in the last position of the peptide sequence
Sequence	The amino acid sequence of the identified peptide.
Sequence coverage	Percentage of the sequence that is covered by the identified peptides of the best protein sequence contained in the group
Sequence length	The length of the leading protein sequence contained in the group
Start position	Position of the first amino acid of this peptide in the protein sequence. (one-based)
T Count	The number of instances of the 'T' amino acid (Thereonine) contained within the sequence
U Count	The number of instances of the 'U' amino acid (Selenocysteine) contained within the sequence
Unique (Groups)	When marked with '+', this particular peptide is unique to a single protein group in the proteinGroups file.
Unique (Proteins)	When marked with '+', this particular peptide is unique to a single protein sequence in the fasta file(s).
Unique peptides	Number of unique peptides
Unique + razor sequence coverage	Percentage of the sequence that is covered by the identified unique and razor peptides of the best protein sequence contained in the group.
Unique sequence coverage	Percentage of the sequence that is covered by the identified unique peptides of the best protein sequence contained in the group
V Count	The number of instances of the 'V' amino acid (Valine) contained within the sequence
W Count	The number of instances of the 'W' amino acid (Tryptophan) contained within the sequence
Y Count	The number of instances of the 'Y' amino acid (Tyrosine) contained within the sequence

## Sheet: peptides
Sequence	N-term cleavage window	C-term cleavage window	Amino acid before	First amino acid	Second amino acid	Second last amino acid	Last amino acid	Amino acid after	A Count	R Count	N Count	D Count	C Count	Q Count	E Count	G Count	H Count	I Count	L Count	K Count	M Count	F Count	P Count	S Count	T Count	W Count	Y Count	V Count	U Count	Length	Missed cleavages	Mass	Proteins	Leading razor protein	Start position	End position	Unique (Groups)	Unique (Proteins)	Charges	PEP	Score	Identification type 1334LH0	Identification type 1334LH312	Identification type 1334LH36	Identification type 1334LH42	Identification type 1334LH57	Identification type 1334LH81	Identification type 1831LH0	Identification type 1831LH312
AAAGELQEDSGLHVLAR	EFLLIFRKAAAGELQE	SGLHVLARLSEIDVST	K	A	A	A	R	L	4	1	0	1	0	1	2	2	1	0	3	0	0	0	0	1	0	0	0	1	0	17	0	1735.89	A5D7A0	A5D7A0	162	178	yes	yes	3	0.00050801	104.16	matching	matching	matching	matching	matching	MS/MS	matching	matching
AAAQEQYSAAVAR	YPGNIKEKAAAQEQYS	QYSAAVARGESAGLVR	K	A	A	A	R	G	6	1	0	0	0	2	1	0	0	0	0	0	0	0	0	1	0	0	1	1	0	13	0	1334.66	F1MMD7;Q3T052;CON__Q3T052	F1MMD7	100	112	yes	no	2	1.1827e-264	225.72	matching	MS/MS	matching	MS/MS	MS/MS	MS/MS	matching	MS/MS
AADAEAEVASLNR	KLELAEKKAADAEAEV	AEVASLNRRIQLVEEE	K	A	A	N	R	R	5	1	1	1	0	0	2	0	0	0	1	0	0	0	0	1	0	0	0	1	0	13	0	1315.64	Q5KR47	Q5KR47	78	90	yes	yes	2	2.2254e-85	196.02	matching	matching	matching	matching	matching	MS/MS	matching	matching
AADETWEPFASGK	VGVKVFKKAADETWEP	WEPFASGKTSESGELH	K	A	A	G	K	T	3	0	0	1	0	0	2	1	0	0	0	1	0	1	1	1	1	1	0	0	0	13	0	1407.63	O46375	O46375	56	68	yes	yes	2	2.249e-63	182.37	matching	matching	MS/MS	matching	matching	matching	matching	matching
AADFSDPAFLAHTNR	EYYFAEVRAADFSDPA	AFLAHTNRHVARLTKG	R	A	A	N	R	H	4	1	1	2	0	0	0	0	1	0	1	0	0	2	1	1	1	0	0	0	0	15	0	1631.77	CON__ENSEMBL:ENSBTAP00000018574;A6QPP2	CON__ENSEMBL:ENSBTAP00000018574	247	261	yes	no	2;3	6.5672e-59	164.66	matching	matching	matching	matching	matching	MS/MS	matching	matching
AAEKQVPGGGGSGGSSGGGSGGSGGGR	________________	SGGSGGGRSAGGEENK	M	A	A	G	R	S	2	1	0	0	0	1	1	14	0	0	0	1	0	0	1	5	0	0	0	1	0	27	1	2130.96	A6QQW3	A6QQW3	2	28	yes	yes	3	0.025629	41.166	matching	matching	matching	matching	matching	matching	matching	matching
AAFDDAIAELDTLSEESYK	DRACRLAKAAFDDAIA	TLSEESYKDSTLIMQL	K	A	A	Y	K	D	4	0	0	3	0	0	3	0	0	1	2	1	0	1	0	2	1	0	1	0	0	19	0	2086.96	P62261	P62261	197	215	yes	yes	2;3	2.574e-208	199.09	matching	matching	matching	matching	matching	MS/MS	matching	matching
AAFDDAIAELDTLSEESYKDSTLIMQLLR	DRACRLAKAAFDDAIA	TLIMQLLRDNLTLWTS	K	A	A	L	R	D	4	1	0	4	0	1	3	0	0	2	5	1	1	1	0	3	2	0	1	0	0	29	1	3257.6	P62261	P62261	197	225	yes	yes	3	7.0896e-23	93.729	matching	matching	matching	matching	MS/MS	MS/MS	matching	matching
AAISGENAGLVR	TAWKQYRKAAISGENA	GENAGLVRASGRTMEQ	K	A	A	V	R	A	3	1	1	0	0	0	1	2	0	1	1	0	0	0	0	1	0	0	0	1	0	12	0	1156.62	Q0VCM5;F1MMP5;CON__Q0VCM5	Q0VCM5	121	132	yes	no	2	1.7608e-44	163.71	matching	MS/MS	MS/MS	MS/MS	MS/MS	matching	matching	matching
AALEGGALGPGEGPER	AVEMVEDKAALEGGAL	GPGEGPEREAGNAFGR	K	A	A	E	R	E	3	1	0	0	0	0	3	5	0	0	2	0	0	0	2	0	0	0	0	0	0	16	0	1479.73	E1BG05;G3MXE5	E1BG05	685	700	yes	no	2	0.0047503	93.106	matching	matching	matching	matching	matching	matching	matching	matching
AALTQNPQFK	________________	LTQNPQFKKLKTWYEQ	M	A	A	F	K	K	2	0	1	0	0	2	0	0	0	0	1	1	0	1	1	0	1	0	0	0	0	10	0	1116.59	Q3ZBD7;CON__Q3ZBD7	Q3ZBD7	2	11	no	no	2	5.0296e-11	140.17	matching	matching	matching	matching	matching	matching	matching	matching
AAQVAVANYNMGSNSDYYYR	PNDPQVQKAAQVAVAN	SNSDYYYRDITILRAH	K	A	A	Y	R	D	4	1	3	1	0	1	0	1	0	0	0	0	1	0	0	2	0	0	4	2	0	20	0	2255.99	F6QEL0	F6QEL0	51	70	yes	yes	2	2.3563e-46	161.55	matching	matching	matching	matching	matching	matching	MS/MS	matching
AAQVTIQSSGTFSTK	ATFTSARKAAQVTIQS	SSGTFSTKFQVENSNR	K	A	A	T	K	F	2	0	0	0	0	2	0	1	0	1	0	1	0	1	0	3	3	0	0	1	0	15	0	1524.78	Q7SIH1;CON__ENSEMBL:ENSBTAP00000024146	Q7SIH1	1312	1326	yes	no	2	1.7126e-73	135.61	matching	matching	matching	matching	matching	matching	matching	matching
AASDIAMTELPPTHPIR	ENSLVAYKAASDIAMT	LPPTHPIRLGLALNFS	K	A	A	I	R	L	3	1	0	1	0	0	1	0	1	2	1	0	1	0	3	1	2	0	0	0	0	17	0	1818.93	P62261	P62261	154	170	yes	yes	3	0.0083278	64.04	matching	matching	matching	matching	matching	matching	matching	matching
AATLSTLAGQPLLER	LVEQGQSRAATLSTLA	AGQPLLERAEAWRQKL	R	A	A	E	R	A	3	1	0	0	0	1	1	1	0	0	4	0	0	0	1	1	2	0	0	0	0	15	0	1539.86	Q03247;CON__Q03247	Q03247	209	223	yes	no	2	0.00011256	120.54	matching	matching	matching	matching	matching	matching	matching	matching
AAVPSGASTGIYEALELR	FTAKGLFRAAVPSGAS	IYEALELRDNDKTRYM	R	A	A	L	R	D	4	1	0	0	0	0	2	2	0	1	2	0	0	0	1	2	1	0	1	1	0	18	0	1803.94	Q9XSJ4;F1MB08;Q3ZC09;A6QR19	Q9XSJ4	33	50	yes	no	2;3	5.014e-66	165.16	matching	matching	matching	matching	MS/MS	MS/MS	matching	matching
AAVYNHFISDGVK	GLHEVEVKAAVYNHFI	HFISDGVKKTLKVVPE	K	A	A	V	K	K	2	0	1	1	0	0	0	1	1	1	0	1	0	1	0	1	0	0	1	2	0	13	0	1419.71	Q2UVX4;CON__Q2UVX4;G3X7A5	Q2UVX4	913	925	yes	no	2;3	2.3146e-92	186.51	matching	MS/MS	matching	MS/MS	MS/MS	MS/MS	MS/MS	MS/MS
AAYQVAALPK	FQSSFPARAAYQVAAL	YQVAALPKGGRVEIEA	R	A	A	P	K	G	4	0	0	0	0	1	0	0	0	0	1	1	0	0	1	0	0	0	1	1	0	10	0	1030.58	Q3T114	Q3T114	108	117	yes	yes	2	0.026784	77.662	matching	matching	matching	matching	matching	matching	matching	matching
AAYYNLSDEISFR	ENGEYWPRAAYYNLSD	LSDEISFRCYDGYTLR	R	A	A	F	R	C	2	1	1	1	0	0	1	0	0	1	1	0	0	1	0	2	0	0	2	0	0	13	0	1547.73	CON__Q3KUS7;P81187	CON__Q3KUS7	118	130	yes	no	2	0.00027852	96.135	matching	matching	matching	matching	matching	matching	matching	matching
ACADPAAGSVILLENLR	CVGPEVEKACADPAAG	VILLENLRFHVEEEGK	K	A	C	L	R	F	4	1	1	1	1	0	1	1	0	1	3	0	0	0	1	1	0	0	0	1	0	17	0	1768.91	Q3T0P6;G3X7N4	Q3T0P6	107	123	yes	no	3	0.0030973	83.856	matching	matching	matching	matching	matching	matching	matching	matching
ACGAGSAELNPNSEWFENYSLCHR	CKACRVCRACGAGSAE	ENYSLCHRCHKAPGGQ	R	A	C	H	R	C	3	1	3	0	2	0	3	2	1	0	2	0	0	1	1	3	0	1	1	0	0	24	0	2768.17	G3MZF2;E1B9N8	G3MZF2	325	348	yes	no	5	0.043199	8.6152	matching	matching	matching	matching	matching	matching	matching	matching
ADAVTLDGGMVFEAGR	IRAIAEKKADAVTLDG	GMVFEAGRDPYKLRPV	K	A	D	G	R	D	3	1	0	2	0	0	1	3	0	0	1	0	1	1	0	0	1	0	0	2	0	16	0	1607.76	P24627	P24627	73	88	yes	yes	2;3	0	250.46	MS/MS	MS/MS	MS/MS	MS/MS	MS/MS	MS/MS	MS/MS	MS/MS
ADAVTLDGGMVFEAGRDPYK	IRAIAEKKADAVTLDG	EAGRDPYKLRPVAAEI	K	A	D	Y	K	L	3	1	0	3	0	0	1	3	0	0	1	1	1	1	1	0	1	0	1	2	0	20	1	2111	P24627	P24627	73	92	yes	yes	2;3	3.4131e-48	154.72	matching	MS/MS	MS/MS	MS/MS	MS/MS	MS/MS	matching	MS/MS
ADDGRPFPQVIK	FHETLYQKADDGRPFP	RPFPQVIKAKGGVVGI	K	A	D	I	K	A	1	1	0	2	0	1	0	1	0	1	0	1	0	1	2	0	0	0	0	1	0	12	1	1341.7	A6QLL8	A6QLL8	88	99	yes	yes	3	0.0010249	123.96	matching	matching	matching	matching	matching	MS/MS	matching	matching
ADGSTITR	GSVTVAWKADGSTITR	ADGSTITRNVKTTRAS	K	A	D	T	R	N	1	1	0	1	0	0	0	1	0	1	0	0	0	0	0	1	2	0	0	0	0	8	0	819.409	CON__Q1RMN8;F1MLW7;F1MCF8;F1MLW8	F1MLW8	171	178	no	no	2	0.0089068	82.645	matching	matching	matching	matching	matching	matching	matching	matching
ADIFLHENALSSQSAFTLAIAAYALSLGDK	KISTAVSKADIFLHEN	YALSLGDKAHPQFRAI	K	A	D	D	K	A	7	0	1	2	0	1	1	1	1	2	5	1	0	2	0	4	1	0	1	0	0	30	0	3136.61	CON__Q1A7A4	CON__Q1A7A4	1171	1200	yes	yes	3	0.030077	32.612	matching	matching	matching	matching	matching	matching	matching	matching
ADKINIDLQVLEPEPELVYGDLR	CQAGDDAKADKINIDL	ELVYGDLRSSVTFDCS	K	A	D	L	R	S	1	1	1	3	0	1	3	1	0	2	4	1	0	0	2	0	0	0	1	2	0	23	1	2638.39	P81265;F6PQI6;F1MR22	P81265	228	250	yes	no	3	1.2512e-10	118.51	MS/MS	MS/MS	MS/MS	matching	matching	matching	MS/MS	MS/MS
ADKPDLGEINSFDK	________________	GEINSFDKAKLKKTET	M	A	D	D	K	A	1	0	1	3	0	0	1	1	0	1	1	2	0	1	1	1	0	0	0	0	0	14	1	1547.75	P21752;CON__P21752	P21752	2	15	yes	no	2	0	228.11	matching	matching	matching	MS/MS	MS/MS	MS/MS	matching	matching
ADLEMQIESLTEELAYLK	LDELTLTKADLEMQIE	TEELAYLKKNHEEEMK	K	A	D	L	K	K	2	0	0	1	0	1	4	0	0	1	4	1	1	0	0	1	1	0	1	0	0	18	0	2095.04	CON__P13645	CON__P13645	267	284	yes	yes	2	0.0030342	89.604	matching	matching	matching	matching	matching	matching	matching	matching
ADLFYDVEASDLETPK	SHIFGFCRADLFYDVE	ASDLETPKDIVTNCEV	R	A	D	P	K	D	2	0	0	3	0	0	2	0	0	0	2	1	0	1	1	1	1	0	1	1	0	16	0	1811.85	F1MKS5;P33433	F1MKS5	223	238	yes	no	2	3.7001e-148	192.78	matching	matching	matching	matching	matching	matching	matching	matching
ADLINNLGTIAK	DTGIGMTKADLINNLG	NNLGTIAKSGTKAFME	K	A	D	A	K	S	2	0	2	1	0	0	0	1	0	2	2	1	0	0	0	0	1	0	0	0	0	12	0	1241.7	Q76LV2	Q76LV2	101	112	yes	yes	2	2.2273e-61	166.45	matching	matching	matching	matching	matching	MS/MS	matching	matching
ADLNQGIGEPQSPSR	LSAKLLRRADLNQGIG	GEPQSPSRRVFNPYTE	R	A	D	S	R	R	1	1	1	1	0	2	1	2	0	1	1	0	0	0	2	2	0	0	0	0	0	15	0	1567.76	A5D7A0	A5D7A0	65	79	yes	yes	2	0	220.25	matching	matching	matching	matching	matching	matching	matching	matching
ADPNMTTQPQLINVVEKPTMAQPIR				A	D	I	R		2	1	2	1	0	3	1	0	0	2	1	1	2	0	4	0	3	0	0	2	0	25	1	2791.44		REV__F1MS84			yes	yes	3	0.00052817	65.149	matching	matching	matching	matching	MS/MS	matching	matching	matching
ADQFANEWGR	DQVREDSKADQFANEW	QFANEWGRSGKDPNHF	K	A	D	G	R	S	2	1	1	1	0	1	1	1	0	0	0	0	0	1	0	0	0	1	0	0	0	10	0	1192.53	Q8SQ28;F1MHZ0	Q8SQ28	105	114	yes	no	1;2	1.6437e-166	197.73	matching	matching	MS/MS	matching	matching	MS/MS	matching	matching
ADQFANEWGRSGK	DQVREDSKADQFANEW	NEWGRSGKDPNHFRPA	K	A	D	G	K	D	2	1	1	1	0	1	1	2	0	0	0	1	0	1	0	1	0	1	0	0	0	13	1	1464.67	Q8SQ28;F1MHZ0	Q8SQ28	105	117	yes	no	2	0.0064655	94.781	matching	matching	matching	matching	matching	matching	matching	matching
ADQLTEEQIAEFK	________________	EEQIAEFKEAFSLFDK	M	A	D	F	K	E	2	0	0	1	0	2	3	0	0	1	1	1	0	1	0	0	1	0	0	0	0	13	0	1520.74	P62157;F1N6C0	P62157	2	14	yes	no	2	1.8485e-37	157.35	matching	matching	matching	matching	MS/MS	MS/MS	matching	matching
ADQLTEEQIAEFKEAFSLFDKDGDGTITTK	________________	GDGTITTKELGTVMRS	M	A	D	T	K	E	3	0	0	4	0	2	4	2	0	2	2	3	0	3	0	1	4	0	0	0	0	30	2	3346.61	P62157;F1N6C0	P62157	2	31	yes	no	3	1.3593e-13	97.784	matching	matching	matching	matching	matching	matching	matching	matching
AEAGDSHEQASGSSVLELEK	GIQIRDKRAEAGDSHE	SSVLELEKGDRVWLES	R	A	E	E	K	G	3	0	0	1	0	1	4	2	1	0	2	1	0	0	0	4	0	0	0	1	0	20	0	2042.94	Q2KIX7	Q2KIX7	161	180	yes	yes	2;3	0	258.43	matching	matching	matching	matching	matching	MS/MS	MS/MS	matching
AEAGDSHEQASGSSVLELEKGDR	GIQIRDKRAEAGDSHE	LELEKGDRVWLESKLD	R	A	E	D	R	V	3	1	0	2	0	1	4	3	1	0	2	1	0	0	0	4	0	0	0	1	0	23	1	2371.09	Q2KIX7	Q2KIX7	161	183	yes	yes	3	1.6553e-76	159.67	matching	matching	matching	MS/MS	MS/MS	MS/MS	matching	matching
AEATTLHVAPQGSAMVVSTFR	YLQEQGHRAEATTLHV	AMVVSTFRKLDGICWA	R	A	E	F	R	K	4	1	0	0	0	1	1	1	1	0	1	0	1	1	1	2	3	0	0	3	0	21	0	2172.1	A8YXZ2	A8YXZ2	70	90	yes	yes	3	0.00077591	77.969	matching	matching	matching	matching	matching	matching	matching	matching
AEEYEFLTPMEEAPK	MVGSYGPRAEEYEFLT	TPMEEAPKGMLARGSY	R	A	E	P	K	G	2	0	0	0	0	0	5	0	0	0	1	1	1	1	2	0	1	0	1	0	0	15	0	1782.8	P19803	P19803	153	167	yes	yes	2	2.0755e-163	197.19	matching	matching	matching	matching	matching	MS/MS	matching	matching
AEFLIFMNTELGAFTK	GNNSKLSKAEFLIFMN	TELGAFTKNQKDPGVL	K	A	E	T	K	N	2	0	1	0	0	0	2	1	0	1	2	1	1	3	0	0	2	0	0	0	0	16	0	1830.92	F1MX83	F1MX83	36	51	yes	yes	2;3	0	262.73	matching	MS/MS	MS/MS	MS/MS	MS/MS	MS/MS	matching	matching
AEFQGVLEK	QCQISLQKAEFQGVLE	EFQGVLEKLNISTDDL	K	A	E	E	K	L	1	0	0	0	0	1	2	1	0	0	1	1	0	1	0	0	0	0	0	1	0	9	0	1019.53	E1BH06;CON__P01030;CON__ENSEMBL:ENSBTAP00000007350;F1MVK1	CON__ENSEMBL:ENSBTAP00000007350	317	325	no	no	2	0.0029048	113.44	matching	MS/MS	MS/MS	MS/MS	matching	matching	matching	matching
AEFVEVTK	RLSQKFPKAEFVEVTK	AEFVEVTKLVTDLTKV	K	A	E	T	K	L	1	0	0	0	0	0	2	0	0	0	0	1	0	1	0	0	1	0	0	2	0	8	0	921.481	P02769;CON__P02769	P02769	249	256	yes	no	2	3.6511e-08	134.26	matching	matching	matching	matching	MS/MS	matching	matching	matching
AEFVEVTKLVTDLTK	RLSQKFPKAEFVEVTK	KLVTDLTKVHKECCHG	K	A	E	T	K	V	1	0	0	1	0	0	2	0	0	0	2	2	0	1	0	0	3	0	0	3	0	15	1	1691.93	P02769;CON__P02769	P02769	249	263	yes	no	2;3	0	242.93	matching	MS/MS	matching	MS/MS	MS/MS	MS/MS	matching	matching
AELADQAASWLTR	HLLLWEGKAELADQAA	QAASWLTRQGSFQGGF	K	A	E	T	R	Q	4	1	0	1	0	1	1	0	0	0	2	0	0	0	0	1	1	1	0	0	0	13	0	1430.72	E1BH06;CON__P01030;P01030;F1MP09;CON__ENSEMBL:ENSBTAP00000007350;F1MVK1	CON__ENSEMBL:ENSBTAP00000007350	1277	1289	no	no	2	7.3198e-38	167.37	matching	matching	matching	matching	matching	MS/MS	matching	matching
AENFFILR	FMRFMMMRAENFFILR	AENFFILRRKPVEGYD	R	A	E	L	R	R	1	1	1	0	0	0	1	0	0	1	1	0	0	2	0	0	0	0	0	0	0	8	0	1008.54	Q148J6	Q148J6	98	105	yes	yes	2	0.00052846	115.7	matching	matching	matching	matching	matching	matching	matching	matching
AENNEFITWNDIQASVDHVNR	MKLKAQARAENNEFIT	ASVDHVNRVVQEEHER	R	A	E	N	R	V	2	1	4	2	0	1	2	0	1	2	0	0	0	1	0	1	1	1	0	2	0	21	0	2471.15	F1MC48	F1MC48	462	482	yes	yes	3	0.00032786	80.596	matching	matching	matching	matching	matching	MS/MS	matching	matching
AEPEDHYFLLTEPPLNTPENR	QVIFKYLRAEPEDHYF	PLNTPENREYTAEIMF	R	A	E	N	R	E	1	1	2	1	0	0	4	0	1	0	3	0	0	1	4	0	2	0	1	0	0	21	0	2481.18	F1N049;P61157	F1N049	69	89	yes	no	3	6.2175e-05	84.249	matching	matching	matching	matching	matching	matching	matching	matching
AEPEPTEGAEGKPEPPKDAEQEPAAASGPSTGGDAPK	AAKEDAPKAEPEPTEG	STGGDAPKASEAEAAE	K	A	E	P	K	A	7	0	0	2	0	1	7	5	0	0	0	3	0	0	8	2	2	0	0	0	0	37	2	3598.65	P80724	P80724	88	124	yes	yes	3;4	8.6449e-09	52.697	matching	matching	matching	MS/MS	MS/MS	MS/MS	matching	matching
AEPETLNLNNEVVK	________________	NLNNEVVKMRKEVKRI	M	A	E	V	K	M	1	0	3	0	0	0	3	0	0	0	2	1	0	0	1	0	1	0	0	2	0	14	0	1568.8	Q05B65	Q05B65	2	15	yes	yes	2	0.0045165	94.122	matching	matching	matching	matching	matching	matching	matching	matching
AEPLAPWSQVEGMEDWEK	HYNSEGRRAEPLAPWS	EGMEDWEKESALQRAR	R	A	E	E	K	E	2	0	0	1	0	1	4	1	0	0	1	1	1	0	2	1	0	2	0	1	0	18	0	2100.95	Q3ZCH5	Q3ZCH5	65	82	yes	yes	2	0.0011873	98.188	matching	matching	matching	matching	matching	matching	matching	matching
AEQEPTAEQLAQIAAENEEDEHSVNYKPPAQK	________________	NYKPPAQKSIQEIQEL	M	A	E	Q	K	S	6	0	2	1	0	4	7	0	1	1	1	2	0	0	3	1	1	0	1	1	0	32	1	3563.67	P19803;Q58DT6	P19803	2	33	yes	no	3	5.1324e-15	93.529	matching	matching	matching	matching	matching	MS/MS	matching	matching
AEVKEHFTTFAK	YSRSQNPRAEVKEHFT	EHFTTFAKSLGFTEEG	R	A	E	A	K	S	2	0	0	0	0	0	2	0	1	0	0	2	0	2	0	0	2	0	0	1	0	12	1	1406.72	O02853	O02853	157	168	yes	yes	2;3	7.6494e-74	183.89	matching	matching	matching	matching	matching	MS/MS	matching	matching
AEVLSPVVSVFVPPR	TVRVIATKAEVLSPVV	VSVFVPPRNSLSGDGN	K	A	E	P	R	N	1	1	0	0	0	0	1	0	0	0	1	0	0	1	3	2	0	0	0	5	0	15	0	1594.91	CON__Q1RMK2;G5E5T5	CON__Q1RMK2	252	266	yes	no	2;3	8.4437e-105	185.66	matching	MS/MS	MS/MS	MS/MS	MS/MS	MS/MS	MS/MS	MS/MS
AFLEVNEEGSEAAASTVISIAGR	YVSDAFHKAFLEVNEE	TVISIAGRSLNSDRVT	K	A	F	G	R	S	5	1	1	0	0	0	4	2	0	2	1	0	0	1	0	3	1	0	0	2	0	23	0	2320.15	P41361;F1MSZ6;CON__P41361	P41361	404	426	yes	no	2;3	1.2695e-44	156.7	matching	MS/MS	MS/MS	MS/MS	MS/MS	MS/MS	MS/MS	MS/MS
AFMSEGFTSFSQIFHSSDLTIK	SCVHHALRAFMSEGFT	HSSDLTIKDTFAEASQ	R	A	F	I	K	D	1	0	0	1	0	1	1	1	1	2	1	1	1	4	0	5	2	0	0	0	0	22	0	2479.17	P50448;CON__P50448;E1BMJ0	P50448	186	207	no	no	3	1.0101e-05	89.468	matching	MS/MS	matching	MS/MS	matching	matching	MS/MS	matching
AGAAASESLFISNHAY	GKYTPSGKAGAAASES	LFISNHAY________	K	A	G	A	Y	-	5	0	1	0	0	0	1	1	1	1	1	0	0	1	0	3	0	0	1	0	0	16	0	1607.76	A6QLL8	A6QLL8	349	364	yes	yes	2	7.8758e-286	222.56	matching	matching	matching	matching	matching	MS/MS	matching	matching
AGALNSNDAFVLK	RAVEVMPKAGALNSND	SNDAFVLKTPSAAYLW	K	A	G	L	K	T	3	0	2	1	0	0	0	1	0	0	2	1	0	1	0	1	0	0	0	1	0	13	0	1318.69	F1N1I6;CON__Q3SX14;Q3SX14;F1MJH1	F1N1I6	584	596	yes	no	2	3.0214e-236	226.42	MS/MS	MS/MS	matching	matching	matching	MS/MS	matching	matching
AGDFLENHYR	SLGRSIAKAGDFLENH	DFLENHYRELRRPYTV	K	A	G	Y	R	E	1	1	1	1	0	0	1	1	1	0	1	0	0	1	0	0	0	0	1	0	0	10	0	1220.56	Q2UVX4;CON__Q2UVX4;G3X7A5	Q2UVX4	1171	1180	yes	no	2;3	4.2313e-49	163.84	MS/MS	MS/MS	matching	matching	MS/MS	MS/MS	matching	MS/MS
AGEEQAKFENQLK	LALEEVEKAGEEQAKF	AKFENQLKTKVMKLEN	K	A	G	L	K	T	2	0	1	0	0	2	3	1	0	0	1	2	0	1	0	0	0	0	0	0	0	13	1	1490.74	G5E6L5;G3MYU4;E1BJ15	G5E6L5	76	88	yes	no	2	0.030791	65.495	matching	matching	matching	matching	matching	matching	matching	matching
AGFEYAFDQLQNPNITR	AKGTTGYKAGFEYAFD	LQNPNITRANCNKMIM	K	A	G	T	R	A	2	1	2	1	0	2	1	1	0	1	1	0	0	2	1	0	1	0	1	0	0	17	0	1982.95	F1MX37	F1MX37	156	172	yes	yes	2	0.007108	80.102	matching	matching	matching	matching	matching	matching	matching	matching
AGGLEKSLNNLETR	ALSSLTSKAGGLEKSL	SLNNLETRRSGETKEL	K	A	G	T	R	R	1	1	2	0	0	0	2	2	0	0	3	1	0	0	0	1	1	0	0	0	0	14	1	1500.79	F1N2Z6	F1N2Z6	197	210	yes	yes	2	0.011844	88.021	matching	matching	matching	matching	matching	matching	matching	matching
AGPGLSIVSYTR	EARVTDHRAGPGLSIV	LSIVSYTRVCRENLCN	R	A	G	T	R	V	1	1	0	0	0	0	0	2	0	1	1	0	0	0	1	2	1	0	1	1	0	12	0	1219.66	E1BF48	E1BF48	91	102	yes	yes	2	3.1968e-45	165.35	matching	matching	matching	MS/MS	MS/MS	MS/MS	matching	matching
AGTDLLNFLSSFIDPK	ELTPFFKKAGTDLLNF	LSSFIDPKKQPATR__	K	A	G	P	K	K	1	0	1	2	0	0	0	1	0	1	3	1	0	2	1	2	1	0	0	0	0	16	0	1736.9	P81644;CON__P81644	P81644	79	94	yes	no	2;3	0	239.58	matching	MS/MS	MS/MS	MS/MS	MS/MS	MS/MS	MS/MS	matching
AGTQIENIDEDFR	WCNSHLRKAGTQIENI	ENIDEDFRDGLKLMLL	K	A	G	F	R	D	1	1	1	2	0	1	2	1	0	2	0	0	0	1	0	0	1	0	0	0	0	13	0	1506.7	A5D7D1	A5D7D1	67	79	yes	yes	2	1.0715e-234	211.83	matching	matching	matching	matching	matching	matching	matching	matching
AGTQIENIDEDFRDGLK	WCNSHLRKAGTQIENI	EDFRDGLKLMLLLEVI	K	A	G	L	K	L	1	1	1	3	0	1	2	2	0	2	1	1	0	1	0	0	1	0	0	0	0	17	1	1919.92	A5D7D1	A5D7D1	67	83	yes	yes	3	0.00014405	104.55	matching	matching	matching	matching	matching	MS/MS	matching	matching
AGTQIENIEEDFR	WCNSHLRKAGTQIENI	ENIEEDFRDGLKLMLL	K	A	G	F	R	D	1	1	1	1	0	1	3	1	0	2	0	0	0	1	0	0	1	0	0	0	0	13	0	1520.71	Q3B7N2;Q3ZC55;F1MRD4;Q0III9;G3X7I1	Q3B7N2	48	60	yes	no	2	5.1455e-06	132.31	matching	matching	matching	matching	matching	matching	matching	matching
AGTTPYVQAFDSLLAGPVAEYLK	GYGDSAAKAGTTPYVQ	GPVAEYLKISKEIGGD	K	A	G	L	K	I	4	0	0	1	0	1	1	2	0	0	3	1	0	1	2	1	2	0	2	2	0	23	0	2410.24	Q3SYV4	Q3SYV4	38	60	yes	yes	2;3	5.0952e-05	96.128	matching	matching	matching	matching	matching	MS/MS	matching	matching
AHDGGIYAISWSPDSTHLLSASGDK	VCALGGSKAHDGGIYA	LLSASGDKTSKIWDVN	K	A	H	D	K	T	3	0	0	3	0	0	0	3	2	2	2	1	0	0	1	5	1	1	1	0	0	25	0	2584.22	Q2KJH4	Q2KJH4	232	256	yes	yes	3	2.5058e-05	81.808	matching	matching	matching	matching	matching	matching	matching	matching
AHVEIVTDGEEPADMIQVLGPK	RDSERQGKAHVEIVTD	MIQVLGPKPSLKEGNP	K	A	H	P	K	P	2	0	0	2	0	1	3	2	1	2	1	1	1	0	2	0	1	0	0	3	0	22	0	2347.17	Q865V6	Q865V6	207	228	yes	yes	3	0.00092928	70.986	matching	matching	matching	matching	matching	matching	matching	matching
AIEDYINEFSVR	LKKQNLERAIEDYINE	YINEFSVRKCQPCQNG	R	A	I	V	R	K	1	1	1	1	0	0	2	0	0	2	0	0	0	1	0	1	0	0	1	1	0	12	0	1454.7	Q3MHN2;CON__Q3MHN2	Q3MHN2	502	513	yes	no	2	1.0417e-57	166.62	matching	MS/MS	matching	matching	matching	matching	MS/MS	matching
AIGGIILTASHNPGGPNGDFGIK	SCIIRKIKAIGGIILT	PNGDFGIKFNISNGGP	K	A	I	I	K	F	2	0	2	1	0	0	0	6	1	4	1	1	0	1	2	1	1	0	0	0	0	23	0	2205.15	Q08DP0;F1MJS4	Q08DP0	108	130	yes	no	3	0.00096297	70.987	matching	matching	matching	matching	matching	matching	matching	matching
AILALTSTLNK	KKESERDRAILALTST	ALTSTLNKLIKRLEEK	R	A	I	N	K	L	2	0	1	0	0	0	0	0	0	1	3	1	0	0	0	1	2	0	0	0	0	11	0	1143.69	F1MX65;Q3MHX6	F1MX65	489	499	yes	no	2	0.0092558	96.756	matching	matching	matching	matching	matching	matching	matching	matching
AILYLNTGYQR	LTAELKSKAILYLNTG	YLNTGYQRQLLYKHFD	K	A	I	Q	R	Q	1	1	1	0	0	1	0	1	0	1	2	0	0	0	0	0	1	0	2	0	0	11	0	1310.7	Q7SIH1;CON__ENSEMBL:ENSBTAP00000024146	Q7SIH1	1041	1051	yes	no	2	1.1324e-146	204.56	matching	matching	matching	MS/MS	matching	MS/MS	matching	matching
AILYNYR	RNEQVEIRAILYNYRE	RAILYNYREAENLKVR	R	A	I	Y	R	E	1	1	1	0	0	0	0	0	0	1	1	0	0	0	0	0	0	0	2	0	0	7	0	911.486	Q2UVX4;CON__Q2UVX4;G3X7A5	Q2UVX4	848	854	yes	no	2	0.0024003	103.29	matching	MS/MS	matching	matching	matching	matching	matching	matching
AIQAAFFYLEPR	PEYNKSARAIQAAFFY	AFFYLEPRHAEDKLIT	R	A	I	P	R	H	3	1	0	0	0	1	1	0	0	1	1	0	0	2	1	0	0	0	1	0	0	12	0	1424.75	Q5GN72;Q3SZR3;CON__Q3SZR3	Q5GN72	62	73	yes	no	2;3	5.2181e-99	153.75	MS/MS	MS/MS	MS/MS	MS/MS	MS/MS	matching	matching	matching
AIQISYNPDQPSKPNNIESATK	SEARELVKAIQISYNP	NNIESATKNSKSMMEE	K	A	I	T	K	N	2	0	3	1	0	2	1	0	0	3	0	2	0	0	3	3	1	0	1	0	0	22	1	2414.21	Q3SZZ9;F1MGU7;P12799	Q3SZZ9	87	108	yes	no	2;3	8.3452e-156	193.06	MS/MS	MS/MS	matching	matching	MS/MS	MS/MS	MS/MS	MS/MS
AISNNEADAVTLDGGLVYEAGLKPNNLK	TSHMDCIKAISNNEAD	GLKPNNLKPVVAEFHG	K	A	I	L	K	P	4	0	4	2	0	0	2	3	0	1	4	2	0	0	1	1	1	0	1	2	0	28	1	2885.48	G3X6N3;CON__Q0IIK2;CON__Q29443;Q29443	G3X6N3	69	96	yes	no	3	0.011049	49.662	matching	matching	matching	matching	matching	matching	matching	matching
AISNNEADAVTLDGGLVYEAGLKPNNLKPVVAEFHGTK	TSHMDCIKAISNNEAD	VAEFHGTKDNPQTHYY	K	A	I	T	K	D	5	0	4	2	0	0	3	4	1	1	4	3	0	1	2	1	2	0	1	4	0	38	2	3951.04	G3X6N3;CON__Q0IIK2;CON__Q29443;Q29443	G3X6N3	69	106	yes	no	3;4;5	5.4867e-28	96.707	matching	MS/MS	matching	MS/MS	MS/MS	MS/MS	matching	MS/MS
AITDVINIGIGGSDLGPLMVTEALKPYSSEGPR	EWKGYSGKAITDVINI	PYSSEGPRVWFVSNID	K	A	I	P	R	V	2	1	1	2	0	0	2	5	0	4	3	1	1	0	3	3	2	0	1	2	0	33	1	3369.75	Q3ZBD7	Q3ZBD7	148	180	yes	yes	3;4	1.9452e-42	115.89	matching	matching	matching	MS/MS	matching	MS/MS	matching	matching
AITDVINIGIGGSDLGPLMVTESLKPYSSEGPR	EWKGYSGKAITDVINI	PYSSEGPRVWFVSNID	K	A	I	P	R	V	1	1	1	2	0	0	2	5	0	4	3	1	1	0	3	4	2	0	1	2	0	33	1	3385.74	CON__Q3ZBD7	CON__Q3ZBD7	148	180	yes	yes	3;4	5.5572e-11	72.791	matching	matching	matching	matching	MS/MS	matching	matching	matching
AITIFQER	GKLVINGKAITIFQER	AITIFQERDPANIKWG	K	A	I	E	R	D	1	1	0	0	0	1	1	0	0	2	0	0	0	1	0	0	1	0	0	0	0	8	0	976.534	P10096	P10096	71	78	yes	yes	2	3.5783e-13	137.13	matching	matching	matching	matching	matching	MS/MS	matching	matching
AIWQVGR	GKRGPLLRAIWQVGRS	RAIWQVGRSAFLLGTL	R	A	I	G	R	S	1	1	0	0	0	1	0	1	0	1	0	0	0	0	0	0	0	1	0	1	0	7	0	828.461	G3N1X7;G5E626	G3N1X7	302	308	yes	no	2	4.1893e-06	122.98	matching	matching	matching	matching	matching	matching	matching	matching
ALAAAGYDVEK	VSLAALKKALAAAGYD	AAGYDVEKNNSRIKLG	K	A	L	E	K	N	4	0	0	1	0	0	1	1	0	0	1	1	0	0	0	0	0	0	1	1	0	11	0	1106.56	P02253;G3MWV5;A7MAZ5;A5PK20;G3N131	P02253	65	75	yes	no	2	0.03679	80.737	matching	matching	matching	matching	matching	matching	matching	matching
ALAAGGVGSIVR	VLLQWHEKALAAGGVG	GGVGSIVRVLTARKTV	K	A	L	V	R	V	3	1	0	0	0	0	0	3	0	1	1	0	0	0	0	1	0	0	0	2	0	12	0	1069.62	Q3SYX9;G3MXC8	Q3SYX9	132	143	yes	no	2	2.4054e-10	109.39	matching	matching	matching	matching	matching	MS/MS	matching	matching
ALAEEAAEKGRNTLQEANDILNNLK	LARADAAKALAEEAAE	NDILNNLKDFDRRVND	K	A	L	L	K	D	5	1	4	1	0	1	4	1	0	1	4	2	0	0	0	0	1	0	0	0	0	25	2	2724.4	F1MD77	F1MD77	1346	1370	yes	yes	3	0.0071922	51.31	matching	matching	matching	matching	matching	matching	matching	matching
ALDDLLQASR	PSETRLARALDDLLQA	DDLLQASRDAGRRLAR	R	A	L	S	R	D	2	1	0	2	0	1	0	0	0	0	3	0	0	0	0	1	0	0	0	0	0	10	0	1100.58	Q0VCG9;G3X6Q8	Q0VCG9	116	125	yes	no	2	4.0253e-205	212.28	matching	matching	matching	MS/MS	MS/MS	MS/MS	matching	matching
ALDFIASK	HKINNVNKALDFIASK	ALDFIASKGVKLVSIG	K	A	L	S	K	G	2	0	0	1	0	0	0	0	0	1	1	1	0	1	0	1	0	0	0	0	0	8	0	863.475	Q3B7N2;Q0III9;G3X7I1;A5D7D1	A5D7D1	115	122	no	no	2	0.019178	82.645	matching	matching	matching	matching	matching	matching	matching	matching
ALDMEDFK	TAGLVRSRALDMEDFK	ALDMEDFKTEVSIAPG	R	A	L	F	K	T	1	0	0	2	0	0	1	0	0	0	1	1	1	1	0	0	0	0	0	0	0	8	0	967.432	F1MNW4;CON__Q9TRI1	F1MNW4	159	166	yes	no	2	0.033332	72.928	matching	matching	matching	matching	matching	matching	matching	matching
ALDPADWTVQK	LELLVDHKALDPADWT	PADWTVQKVFFQGRYY	K	A	L	Q	K	V	2	0	0	2	0	1	0	0	0	0	1	1	0	0	1	0	1	1	0	1	0	11	0	1242.62	Q29437	Q29437	252	262	yes	yes	2	1.2972e-06	134.38	matching	matching	matching	matching	matching	matching	matching	matching
ALEESNYELEGK	ASYLDKVRALEESNYE	SNYELEGKIKEWYEKH	R	A	L	G	K	I	1	0	1	0	0	0	4	1	0	0	2	1	0	0	0	1	0	0	1	0	0	12	0	1380.64	CON__P13645	CON__P13645	166	177	no	no	2	8.4659e-33	158.86	matching	matching	matching	matching	matching	matching	matching	matching
ALEHKVDLEDYK	SCKGSCSRALEHKVDL	KVDLEDYKNQQKQLEQ	R	A	L	Y	K	N	1	0	0	2	0	0	2	0	1	0	2	2	0	0	0	0	0	0	1	1	0	12	1	1458.74	P02672;CON__P02672;A5PJE3	P02672	190	201	yes	no	3	0.04192	51.979	matching	matching	matching	matching	matching	matching	matching	matching
ALESPERPFLAILGGAK	KELNYFAKALESPERP	LAILGGAKVADKIQLI	K	A	L	A	K	V	3	1	0	0	0	0	2	2	0	1	3	1	0	1	2	1	0	0	0	0	0	17	1	1767.99	Q3T0P6	Q3T0P6	200	216	yes	yes	3	1.9657e-10	142.39	matching	matching	matching	matching	matching	MS/MS	matching	matching
ALETHTYFER	SWSRQNGKALETHTYF	ETHTYFERHLNDTFSA	K	A	L	E	R	H	1	1	0	0	0	0	2	0	1	0	1	0	0	1	0	0	2	0	1	0	0	10	0	1265.6	CON__Q1RMK2;G5E513	CON__Q1RMK2	411	420	yes	no	2;3	4.9099e-57	166.66	matching	MS/MS	matching	matching	matching	MS/MS	MS/MS	MS/MS
ALFSPCFTEVGIAPFRK				A	L	R	K		2	1	0	0	1	0	1	1	0	1	1	1	0	3	2	1	1	0	0	1	0	17	1	1939		REV__F1MQH2			yes	yes	3	0.03429	42.242	matching	matching	matching	matching	matching	matching	matching	matching
ALGAVLEELR	RPQEEAGRALGAVLEE	GAVLEELRRTRADLRA	R	A	L	L	R	R	2	1	0	0	0	0	2	1	0	0	3	0	0	0	0	0	0	0	0	1	0	10	0	1069.61	Q0VCG9;G3X6Q8	Q0VCG9	149	158	yes	no	2	0.00014877	133.81	matching	matching	matching	MS/MS	matching	matching	matching	matching
ALGDLISATK	NAVKDVAKALGDLISA	GDLISATKAAAGKVGD	K	A	L	T	K	A	2	0	0	1	0	0	0	1	0	1	2	1	0	0	0	1	1	0	0	0	0	10	0	987.56	F1MDH3	F1MDH3	2099	2108	yes	yes	2	0.023671	80.737	matching	matching	matching	matching	matching	matching	matching	matching
ALGMVDAFIFR	YDLVATLRALGMVDAF	MVDAFIFRVANFSGMT	R	A	L	F	R	V	2	1	0	1	0	0	0	1	0	1	1	0	1	2	0	0	0	0	0	1	0	11	0	1238.65	A6QPZ4	A6QPZ4	249	259	yes	yes	2	8.4681e-34	155.53	matching	MS/MS	matching	MS/MS	MS/MS	matching	matching	matching
ALGMVDAFR	YDLVPTLRALGMVDAF	LGMVDAFRDGVADFSG	R	A	L	F	R	D	2	1	0	1	0	0	0	1	0	0	1	0	1	1	0	0	0	0	0	1	0	9	0	978.496	G5E537	G5E537	156	164	yes	yes	2	6.7876e-17	143.7	matching	matching	matching	matching	matching	MS/MS	matching	matching
ALGQNPTNAEVLK	SQCGDVMRALGQNPTN	PTNAEVLKVLGNPKSD	R	A	L	L	K	V	2	0	2	0	0	1	1	1	0	0	2	1	0	0	1	0	1	0	0	1	0	13	0	1353.73	P60661	P60661	38	50	yes	yes	2	3.1418e-05	129.54	matching	matching	matching	matching	matching	MS/MS	matching	matching
ALGVTALFDK	YDLVGALRALGVTALF	GVTALFDKHSNTTGIT	R	A	L	D	K	H	2	0	0	1	0	0	0	1	0	0	2	1	0	1	0	0	1	0	0	1	0	10	0	1033.58	CON__ENSEMBL:ENSBTAP00000018574;A6QPP2	CON__ENSEMBL:ENSBTAP00000018574	408	417	yes	no	2	9.5442e-08	142.83	matching	MS/MS	MS/MS	MS/MS	MS/MS	MS/MS	MS/MS	matching
ALGVTTVAAQAMK	PCITSVAKALGVTTVA	TVAAQAMKVYREHPIF	K	A	L	M	K	V	4	0	0	0	0	1	0	1	0	0	1	1	1	0	0	0	2	0	0	2	0	13	0	1259.69	Q0VCW4;F1N0R8	Q0VCW4	222	234	yes	no	2	3.3088e-155	193.28	matching	matching	matching	matching	matching	MS/MS	matching	matching
ALHFEGVEIHSGFQSLNADINK	DTAAQMSKALHFEGVE	SLNADINKCGAPYTLK	K	A	L	N	K	C	2	0	2	1	0	1	2	2	2	2	2	1	0	2	0	2	0	0	0	1	0	22	0	2425.2	Q1JPB0;G1K1L8	Q1JPB0	57	78	yes	no	2;3;4	0	236.66	matching	matching	matching	MS/MS	matching	MS/MS	matching	matching
ALLAYAFALAGNQER	QGSHVYTKALLAYAFA	ALAGNQERRTEVLTSL	K	A	L	E	R	R	5	1	1	0	0	1	1	1	0	0	3	0	0	1	0	0	0	0	1	0	0	15	0	1606.85	Q7SIH1;CON__ENSEMBL:ENSBTAP00000024146	Q7SIH1	1185	1199	yes	no	2	1.1093e-05	123.29	matching	matching	matching	MS/MS	matching	matching	matching	matching
ALLDPSFFAK	RAGEIQNKALLDPSFF	LDPSFFAKESVKDAAG	K	A	L	A	K	E	2	0	0	1	0	0	0	0	0	0	2	1	0	2	1	1	0	0	0	0	0	10	0	1107.6	P81265;F6PQI6;F1MR22;G5E6M1	P81265	594	603	yes	no	2	1.8052e-05	140.17	MS/MS	MS/MS	matching	matching	matching	matching	MS/MS	MS/MS
ALLEMQQTK	QEAPLEWKALLEMQQT	LLEMQQTKMVLETFGG	K	A	L	T	K	M	1	0	0	0	0	2	1	0	0	0	2	1	1	0	0	0	1	0	0	0	0	9	0	1060.56	P02672;CON__P02672;A5PJE3	P02672	253	261	yes	no	2	0.00095314	120.45	matching	matching	matching	matching	matching	matching	matching	matching
ALLEVYNMMSR	KAGTNTKRALLEVYNM	EVYNMMSREVNQFKET	R	A	L	S	R	E	1	1	1	0	0	0	1	0	0	0	2	0	2	0	0	1	0	0	1	1	0	11	0	1325.65	CON__Q3KUS7;P81187	CON__Q3KUS7	357	367	yes	no	2	0	233.13	matching	MS/MS	matching	MS/MS	MS/MS	MS/MS	matching	matching
ALNEINQFYQK	VDDKHYQKALNEINQF	EINQFYQKFPQYLQYL	K	A	L	Q	K	F	1	0	2	0	0	2	1	0	0	1	1	1	0	1	0	0	0	0	1	0	0	11	0	1366.69	CON__P02663;P02663	CON__P02663	81	91	yes	no	2;3	4.5022e-187	206.36	MS/MS	MS/MS	MS/MS	MS/MS	MS/MS	MS/MS	matching	MS/MS
ALNHLPLEYNSALYSR	QLSDVFLKALNHLPLE	YNSALYSRIFDDFGTH	K	A	L	S	R	I	2	1	2	0	0	0	1	0	1	0	4	0	0	0	1	2	0	0	2	0	0	16	0	1859.95	Q29RU4;F1MM86	Q29RU4	341	356	yes	no	3	0.042014	49.343	matching	matching	matching	matching	matching	matching	matching	matching
ALPFWNEEIVPQIK	SLKDTIARALPFWNEE	EEIVPQIKEGKRVLIA	R	A	L	I	K	E	1	0	1	0	0	1	2	0	0	2	1	1	0	1	2	0	0	1	0	1	0	14	0	1682.9	Q3SZ62;G3N3V1	Q3SZ62	163	176	yes	no	2	0.0001072	141.59	matching	matching	matching	matching	matching	matching	matching	matching
ALPMHIR	EKFDKALKALPMHIRL	KALPMHIRLSFNPTQL	K	A	L	I	R	L	1	1	0	0	0	0	0	0	1	1	1	0	1	0	1	0	0	0	0	0	0	7	0	836.469	CON__P02754;P02754;G5E5H7	CON__P02754	142	148	yes	no	2	0.0064411	86.935	matching	matching	matching	matching	matching	matching	matching	matching
ALSDSCNYNEKENLEDK	EFGVKVDRALSDSCNY	EKENLEDKKISNQSEP	R	A	L	D	K	K	1	0	3	2	1	0	3	0	0	0	2	2	0	0	0	2	0	0	1	0	0	17	1	2027.87	E1BEG4	E1BEG4	214	230	yes	yes	2	0.0083591	73.802	matching	matching	matching	matching	matching	matching	matching	matching
ALTAVSPDSTLLFNAYVHFQGK	VTGWNMGRALTAVSPD	AYVHFQGKMKGFSLLP	R	A	L	G	K	M	3	0	1	1	0	1	0	1	1	0	3	1	0	2	1	2	2	0	1	2	0	22	0	2378.23	Q3SZH5;CON__Q3SZH5	Q3SZH5	257	278	yes	no	3	0.0021424	67.418	matching	matching	matching	matching	matching	matching	matching	matching
ALTSELANAR	ERVQKHLKALTSELAN	TSELANARDESKKTAN	K	A	L	A	R	D	3	1	1	0	0	0	1	0	0	0	2	0	0	0	0	1	1	0	0	0	0	10	0	1044.56	Q2HJ49	Q2HJ49	524	533	yes	yes	2	1.6288e-16	146.11	matching	matching	matching	matching	matching	matching	matching	matching
ALVALGAVDTALYAVGGK	LNLKTESRALVALGAV	ALYAVGGKSHKPLDMV	R	A	L	G	K	S	5	0	0	1	0	0	0	3	0	0	3	1	0	0	0	0	1	0	1	3	0	18	0	1687.95	E1BH06;CON__P01030;CON__ENSEMBL:ENSBTAP00000007350;F1MVK1	CON__ENSEMBL:ENSBTAP00000007350	596	613	no	no	2;3	0	217.19	matching	MS/MS	matching	MS/MS	matching	MS/MS	matching	matching
ALVEQVDQLLTDYEIK	NANPEDLKALVEQVDQ	LLTDYEIKDGHVILQL	K	A	L	I	K	D	1	0	0	2	0	2	2	0	0	1	3	1	0	0	0	0	1	0	1	2	0	16	0	1875.98	F1MY85;CON__Q1A7A4	F1MY85	1439	1454	no	no	2;3	2.2169e-236	208.85	matching	matching	matching	matching	matching	matching	matching	matching
ALWTGALTPGR	PLPRPQLRALWTGALT	TGALTPGRDAVLRCEA	R	A	L	G	R	D	2	1	0	0	0	0	0	2	0	0	2	0	0	0	1	0	2	1	0	0	0	11	0	1141.62	Q2KJF1;CON__Q2KJF1	Q2KJF1	415	425	yes	no	2	3.2703e-24	150.46	matching	matching	matching	MS/MS	matching	MS/MS	matching	matching
ALYYDLISNPDIHGTYK	RTESNIHRALYYDLIS	PDIHGTYKDLLASVTA	R	A	L	Y	K	D	1	0	1	2	0	0	0	1	1	2	2	1	0	0	1	1	1	0	3	0	0	17	0	1981.98	Q95121;CON__Q95121	Q95121	105	121	yes	no	3	0.0017716	93.478	matching	MS/MS	matching	matching	matching	MS/MS	MS/MS	matching
AMELLQEEDLIEEDDIPVR	RGQVGLARAMELLQEE	EEDDIPVRSFFPENWL	R	A	M	V	R	S	1	1	0	3	0	1	5	0	0	2	3	0	1	0	1	0	0	0	0	1	0	19	0	2256.08	E1BH06;CON__P01030;CON__ENSEMBL:ENSBTAP00000007350;F1MVK1	CON__ENSEMBL:ENSBTAP00000007350	756	774	no	no	2;3	3.1262e-173	190.67	matching	matching	matching	MS/MS	MS/MS	MS/MS	matching	matching
AMGIMNSFVNDIFER	PDTGISSKAMGIMNSF	FVNDIFERIAGEASRL	K	A	M	E	R	I	1	1	2	1	0	0	1	1	0	2	0	0	2	2	0	1	0	0	0	1	0	15	0	1742.81	Q32S29;Q2M2T1;Q2KII5;P62808;G3N0F3;F2Z4F9;F2Z4E8;F1N453;F1MUD2;F1MIF8;E1BGW2;G8JL06;G3MXP6;E1B8G9	Q32S29	59	73	yes	no	2	2.1915e-118	184.48	matching	MS/MS	matching	matching	matching	MS/MS	matching	matching
AMVQQLDTLR	PYGETFNKAMVQQLDT	VQQLDTLRQKLGPLAG	K	A	M	L	R	Q	1	1	0	1	0	2	0	0	0	0	2	0	1	0	0	0	1	0	0	1	0	10	0	1173.62	Q32PJ2;F1N3Q7;CON__Q32PJ2	Q32PJ2	317	326	yes	no	2	1.7568e-29	172.21	matching	matching	matching	matching	matching	matching	matching	matching
ANEGLTWNSLK	LAVAVVKKANEGLTWN	GLTWNSLKDKKSCHTA	K	A	N	L	K	D	1	0	2	0	0	0	1	1	0	0	2	1	0	0	0	1	1	1	0	0	0	11	0	1231.62	P24627	P24627	461	471	yes	yes	2	6.7049e-219	218.94	matching	MS/MS	MS/MS	matching	matching	MS/MS	MS/MS	MS/MS
ANLQIDQLNTDLNLER	LVNDRLKKANLQIDQL	NTDLNLERSHTQKNEN	K	A	N	E	R	S	1	1	3	2	0	2	1	0	0	1	4	0	0	0	0	0	1	0	0	0	0	16	0	1868.96	F1MQ37	F1MQ37	1755	1770	yes	yes	2	5.7332e-121	199.65	matching	matching	matching	matching	matching	matching	matching	matching
ANSHFATAFYQHLADSK	RRVWELSKANSHFATA	YQHLADSKNNNDNIFL	K	A	N	S	K	N	4	0	1	1	0	1	0	0	2	0	1	1	0	2	0	2	1	0	1	0	0	17	0	1906.9	P41361;F1MSZ6;CON__P41361	P41361	87	103	yes	no	3	0.0068609	76.051	matching	matching	matching	matching	matching	matching	matching	matching
APAAIGPYSQAVLVDR	RKIISTAKAPAAIGPY	SQAVLVDRTIYISGQL	K	A	P	D	R	T	4	1	0	1	0	1	0	1	0	1	1	0	0	0	2	1	0	0	1	2	0	16	0	1626.87	Q3T114	Q3T114	14	29	yes	yes	2	1.2172e-23	148.52	matching	matching	matching	MS/MS	MS/MS	MS/MS	matching	matching
APDFVFYAPR	VIKPIDKKAPDFVFYA	DFVFYAPRLRINKRIL	K	A	P	P	R	L	2	1	0	1	0	0	0	0	0	0	0	0	0	2	2	0	0	0	1	1	0	10	0	1181.59	Q2HJ49;P31976;Q32LP2;F1MJJ8	P31976	264	273	no	no	2	0.01379	99.568	matching	matching	matching	matching	matching	matching	matching	matching
APEIANSHVEYSVR	ATADSCPKAPEIANSH	SHVEYSVRYQCDKYYK	K	A	P	V	R	Y	2	1	1	0	0	0	2	0	1	1	0	0	0	0	1	2	0	0	1	2	0	14	0	1570.77	Q2TBU0;G3X6K8	Q2TBU0	33	46	yes	no	2;3	0	227.91	matching	MS/MS	MS/MS	MS/MS	MS/MS	MS/MS	matching	MS/MS
APELGHGVEGGNVAKPDPEVTER	AKAHPLARAPELGHGV	PDPEVTERCSDGWGFD	R	A	P	E	R	C	2	1	1	1	0	0	4	4	1	0	1	1	0	0	3	0	1	0	0	3	0	23	1	2357.16	Q3SZV7;CON__Q3SZV7	Q3SZV7	29	51	yes	no	2;3;4	4.6442e-114	182.13	matching	MS/MS	matching	MS/MS	MS/MS	MS/MS	matching	MS/MS
APEPHVEEDDDELDGK	________________	DDDELDGKLNYKPPPQ	K	A	P	G	K	L	1	0	0	4	0	0	4	1	1	0	1	1	0	0	2	0	0	0	0	1	0	16	0	1793.76	Q9TU03	Q9TU03	5	20	yes	yes	2;3	0	236.03	matching	matching	MS/MS	MS/MS	matching	MS/MS	matching	matching
APEPHVEEDDDELDGKLNYKPPPQK	________________	NYKPPPQKSLKELQEM	K	A	P	Q	K	S	1	0	1	4	0	1	4	1	1	0	2	3	0	0	5	0	0	0	1	1	0	25	2	2859.36	Q9TU03	Q9TU03	5	29	yes	yes	3;4	1.1223e-06	105.92	matching	matching	matching	matching	matching	matching	matching	matching
APFDLFENR	ALLFVPRRAPFDLFEN	PFDLFENRKKKNNIKL	R	A	P	N	R	K	1	1	1	1	0	0	1	0	0	0	1	0	0	2	1	0	0	0	0	0	0	9	0	1107.53	Q76LV2	Q76LV2	348	356	yes	yes	2	5.5811e-17	160.36	matching	matching	matching	matching	matching	MS/MS	matching	matching
APGSASEAFFEQGPTR	AFTKENLRAPGSASEA	FFEQGPTRIGGSYKKL	R	A	P	T	R	I	3	1	0	0	0	1	2	2	0	0	0	0	0	2	2	2	1	0	0	0	0	16	0	1650.76	F1N076;CON__ENSEMBL:ENSBTAP00000031900	F1N076	399	414	no	no	2;3	0	262.83	matching	MS/MS	matching	MS/MS	MS/MS	MS/MS	matching	MS/MS
APLDVVAGFNVPLFK	NGRQLMVKAPLDVVAG	GFNVPLFKTVVELHVE	K	A	P	F	K	T	2	0	1	1	0	0	0	1	0	0	2	1	0	2	2	0	0	0	0	3	0	15	0	1585.89	Q8SPF8;F1MLW2	Q8SPF8	110	124	yes	no	2	0.0012963	115.1	matching	matching	matching	matching	matching	matching	matching	matching
APLPFPPPGLR	DSPPFQARAPLPFPPP	PFPPPGLRCPHPPFGT	R	A	P	L	R	C	1	1	0	0	0	0	0	1	0	0	2	0	0	1	5	0	0	0	0	0	0	11	0	1160.67	F1MKS5;P33433	F1MKS5	319	329	yes	no	2	0.026701	81.95	matching	matching	matching	matching	matching	matching	matching	matching
APSAEVEMTAYVILAHVTAQPAPNPEDLK	TEDIYQPRAPSAEVEM	APNPEDLKRATSIVKW	R	A	P	L	K	R	6	0	1	1	0	1	3	0	1	1	2	1	1	0	4	1	2	0	1	3	0	29	0	3061.54	Q7SIH1;CON__ENSEMBL:ENSBTAP00000024146	Q7SIH1	1238	1266	yes	no	3;4	1.593e-41	122.51	matching	matching	matching	matching	matching	matching	matching	matching
APSAEVEMTAYVILAHVTAQPAPNPEDLKR	TEDIYQPRAPSAEVEM	PNPEDLKRATSIVKWI	R	A	P	K	R	A	6	1	1	1	0	1	3	0	1	1	2	1	1	0	4	1	2	0	1	3	0	30	1	3217.64	Q7SIH1;CON__ENSEMBL:ENSBTAP00000024146	Q7SIH1	1238	1267	yes	no	3;4	6.2166e-77	147.78	matching	MS/MS	MS/MS	MS/MS	MS/MS	MS/MS	matching	matching
APSESQPRPQEAGPPQAEVPEAR	KDQSQQPRAPSESQPR	QAEVPEARGNVPSHSE	R	A	P	A	R	G	4	2	0	0	0	3	4	1	0	0	0	0	0	0	6	2	0	0	0	1	0	23	1	2427.18	E1BLA8	E1BLA8	202	224	yes	yes	3	9.3786e-08	100.59	matching	MS/MS	matching	matching	matching	matching	matching	MS/MS
APSSEKPQSMFEPPQVSSPVQEK	SQEKAGPRAPSSEKPQ	VSSPVQEKRDVLPKIL	R	A	P	E	K	R	1	0	0	0	0	3	3	0	0	0	0	2	1	1	5	5	0	0	0	2	0	23	1	2513.21	F1N1T3	F1N1T3	609	631	yes	yes	3	0.032888	42.908	matching	matching	matching	matching	matching	MS/MS	matching	matching
APWPELENSQPTSEK	________________	NSQPTSEKYTVKADGE	M	A	P	E	K	Y	1	0	1	0	0	1	3	0	0	0	1	1	0	0	3	2	1	1	0	0	0	15	0	1711.81	Q27960;F1N6D4	Q27960	2	16	yes	no	2	4.8616e-06	124.2	matching	matching	matching	matching	matching	matching	MS/MS	matching
AQAPAAPADEVKPAETPAANSDQTVAVK	EAPSSTPKAQAPAAPA	SDQTVAVKE_______	K	A	Q	V	K	E	9	0	1	2	0	2	2	0	0	0	0	2	0	0	4	1	2	0	0	3	0	28	1	2746.38	P80724	P80724	199	226	yes	yes	3	5.8347e-08	97.94	matching	matching	matching	matching	MS/MS	matching	matching	matching
AQAPAAPADEVKPAETPAANSDQTVAVKE	EAPSSTPKAQAPAAPA	DQTVAVKE________	K	A	Q	K	E	-	9	0	1	2	0	2	3	0	0	0	0	2	0	0	4	1	2	0	0	3	0	29	2	2875.42	P80724	P80724	199	227	yes	yes	3	9.891e-18	101.86	matching	matching	matching	matching	matching	matching	matching	matching
AQEGPGQAEPPAAAAEER	QVREEMLRAQEGPGQA	PAAAAEERGAGGENEP	R	A	Q	E	R	G	6	1	0	0	0	2	4	2	0	0	0	0	0	0	3	0	0	0	0	0	0	18	0	1777.82	Q3SZK8	Q3SZK8	113	130	yes	yes	2	1.447e-113	195.46	matching	matching	matching	matching	matching	matching	matching	matching
AQEVLQAIR	DHPQERAKAQEVLQAI	QEVLQAIRGYVRFFFG	K	A	Q	I	R	G	2	1	0	0	0	2	1	0	0	1	1	0	0	0	0	0	0	0	0	1	0	9	0	1026.58	F1MM32	F1MM32	433	441	yes	yes	2	3.1078e-12	142	matching	MS/MS	matching	MS/MS	MS/MS	matching	matching	matching
AQLVFEDLNQELLEELPVLYNSR	KAEEEFNKAQLVFEDL	LPVLYNSRIGCYVTIF	K	A	Q	S	R	I	1	1	2	1	0	2	4	0	0	0	6	0	0	1	1	1	0	0	1	2	0	23	0	2731.41	A4FUG5	A4FUG5	180	202	yes	yes	3	0.019136	46.818	matching	matching	matching	matching	matching	matching	matching	matching
AQPGGELMLGGTDSK	FFLNRDPKAQPGGELM	MLGGTDSKYYRGSLMF	K	A	Q	S	K	Y	1	0	0	1	0	1	1	4	0	0	2	1	1	0	1	1	1	0	0	0	0	15	0	1459.7	F1MMR6;P80209	F1MMR6	239	253	yes	no	2	0.0089304	87.419	matching	matching	matching	matching	matching	matching	matching	matching
AQPVQVAEGSEPDSFWEALGGK	LELLRVLRAQPVQVAE	FWEALGGKAAYRTSPR	R	A	Q	G	K	A	3	0	0	1	0	2	3	3	0	0	1	1	0	1	2	2	0	1	0	2	0	22	0	2301.09	F1N1I6;CON__Q3SX14;Q3SX14;F1MJH1	F1N1I6	626	647	yes	no	2;3	2.1054e-106	162.81	matching	matching	matching	matching	matching	MS/MS	MS/MS	matching
AQQEHQSLLEK	KREKDLLKAQQEHQSL	EHQSLLEKLSALEKKV	K	A	Q	E	K	L	1	0	0	0	0	3	2	0	1	0	2	1	0	0	0	1	0	0	0	0	0	11	0	1309.66	E1BKE3;E1B999	E1BKE3	355	365	yes	no	2	0.041688	60.064	matching	matching	matching	matching	MS/MS	matching	matching	matching
AQQPAAELMQGTVSLQKDTR	VISELEGKAQQPAAEL	VSLQKDTRDFLNRYPR	K	A	Q	T	R	D	3	1	0	1	0	4	1	1	0	0	2	1	1	0	1	1	2	0	0	1	0	20	1	2171.1	G3X823	G3X823	246	265	yes	yes	3	0.042391	44.998	matching	matching	matching	matching	matching	matching	matching	matching
AQQSLPELSNHASILIMLTDGEPTEGVMDR	RGIEILNKAQQSLPEL	PTEGVMDRTQILKNVR	K	A	Q	D	R	T	2	1	1	2	0	2	3	2	1	2	4	0	2	0	2	3	2	0	0	1	0	30	0	3251.58	Q0VCM5;F1MMP5;CON__Q0VCM5	Q0VCM5	379	408	yes	no	3	6.8878e-11	85.157	matching	matching	matching	MS/MS	MS/MS	matching	matching	matching
AREDIFMETLSDIMDYYK	EKESALQRAREDIFME	SDIMDYYKDREGSHTF	R	A	R	Y	K	D	1	1	0	3	0	0	2	0	0	2	1	1	2	1	0	1	1	0	2	0	0	18	1	2239.02	Q3ZCH5	Q3ZCH5	89	106	yes	yes	2;3	2.2267e-42	150.91	MS/MS	MS/MS	MS/MS	MS/MS	MS/MS	MS/MS	MS/MS	MS/MS
AREDIFMETLSDIMDYYKDR	EKESALQRAREDIFME	IMDYYKDREGSHTFQG	R	A	R	D	R	E	1	2	0	4	0	0	2	0	0	2	1	1	2	1	0	1	1	0	2	0	0	20	2	2510.15	Q3ZCH5	Q3ZCH5	89	108	yes	yes	3;4	3.0185e-136	193.47	matching	matching	matching	matching	matching	matching	MS/MS	matching
ARPQELPFLASIQNQGR	VDIVGGRKARPQELPF	ASIQNQGRHFCGGALI	K	A	R	G	R	H	2	2	1	0	0	3	1	1	0	1	2	0	0	1	2	1	0	0	0	0	0	17	1	1924.03	G3N0Q8;G3N2H4	G3N0Q8	25	41	yes	no	3	7.1698e-148	189.33	matching	matching	matching	MS/MS	MS/MS	MS/MS	matching	matching
ASADESLALGK	GRNRRGSKASADESLA	DESLALGKPGKEPRSQ	K	A	S	G	K	P	3	0	0	1	0	0	1	1	0	0	2	1	0	0	0	2	0	0	0	0	0	11	0	1060.54	Q9MZ06	Q9MZ06	35	45	yes	yes	2	0.0030477	101.71	matching	matching	matching	matching	matching	matching	matching	matching
ASADESLALGKPGK	GRNRRGSKASADESLA	LALGKPGKEPRSQPTN	K	A	S	G	K	E	3	0	0	1	0	0	1	2	0	0	2	2	0	0	1	2	0	0	0	0	0	14	1	1342.71	Q9MZ06	Q9MZ06	35	48	yes	yes	2;3	8.0614e-78	173.06	MS/MS	matching	MS/MS	MS/MS	matching	MS/MS	matching	matching
ASADESLALGKPGKEPR	GRNRRGSKASADESLA	GKPGKEPRSQPTNYPI	K	A	S	P	R	S	3	1	0	1	0	0	2	2	0	0	2	2	0	0	2	2	0	0	0	0	0	17	2	1724.91	Q9MZ06	Q9MZ06	35	51	yes	yes	3;4	5.3825e-06	130.2	matching	matching	matching	matching	matching	matching	MS/MS	matching
ASEQILLATAHTLLLR	CFLAGDFRASEQILLA	TAHTLLLREHNRLARE	R	A	S	L	R	E	3	1	0	0	0	1	1	0	1	1	5	0	0	0	0	1	2	0	0	0	0	16	0	1749.01	P80025;G3MXZ0	P80025	373	388	yes	no	3	0.0001304	116.58	matching	matching	matching	matching	matching	MS/MS	matching	matching
ASFSVLGDILGSAMR	NVVEESARASFSVLGD	DILGSAMRNTQNLLQM	R	A	S	M	R	N	2	1	0	1	0	0	0	2	0	1	2	0	1	1	0	3	0	0	0	1	0	15	0	1522.78	Q7SIH1;CON__ENSEMBL:ENSBTAP00000024146	Q7SIH1	983	997	yes	no	2;3	2.847e-122	197.06	matching	matching	matching	MS/MS	MS/MS	MS/MS	matching	matching
ASGPNMMDPICLVENK	________________	PICLVENKNAQLSVNQ	M	A	S	N	K	N	1	0	2	1	1	0	1	1	0	1	1	1	2	0	2	1	0	0	0	1	0	16	0	1774.81	E1B824	E1B824	2	17	yes	yes	2	3.4117e-05	116.79	matching	matching	MS/MS	MS/MS	matching	matching	matching	matching
ASGPPVSELITK	KPAGARRKASGPPVSE	PVSELITKAVAASKER	K	A	S	T	K	A	1	0	0	0	0	0	1	1	0	1	1	1	0	0	2	2	1	0	0	1	0	12	0	1197.66	P02253;G3MWV5;A7MAZ5	P02253	35	46	yes	no	2	2.1452e-11	140.45	matching	matching	MS/MS	matching	MS/MS	MS/MS	matching	matching
ASGVAVSDGVIK	________________	AVSDGVIKVFNDMKVR	M	A	S	I	K	V	2	0	0	1	0	0	0	2	0	1	0	1	0	0	0	2	0	0	0	3	0	12	0	1101.6	Q5E9F7	Q5E9F7	2	13	yes	yes	2	2.4813e-26	150.69	matching	matching	matching	matching	matching	MS/MS	matching	matching
ASSEASPDPQPPEKPVR	PASPTSPRASSEASPD	QPPEKPVREKENTDNL	R	A	S	V	R	E	2	1	0	1	0	1	2	0	0	0	0	1	0	0	5	3	0	0	0	1	0	17	1	1790.88	A4FUG5	A4FUG5	446	462	yes	yes	3	0.029907	53.946	matching	matching	matching	matching	matching	matching	matching	matching
ASSIMDELFQDR	VMEDSFTRASSIMDEL	MDELFQDRFFLRRPQD	R	A	S	D	R	F	1	1	0	2	0	1	1	0	0	1	1	0	1	1	0	2	0	0	0	0	0	12	0	1410.64	P17697;CON__P17697	P17697	177	188	yes	no	2	4.5035e-174	209.67	matching	MS/MS	matching	MS/MS	MS/MS	MS/MS	MS/MS	MS/MS
ASVPDGLLSELTQQLAQATGK	VVNTNVPRASVPDGLL	QLAQATGKPAQYIAVH	R	A	S	G	K	P	3	0	0	1	0	3	1	2	0	0	4	1	0	0	1	2	2	0	0	1	0	21	0	2126.12	P80177	P80177	13	33	yes	yes	3	3.0907e-05	85.054	matching	matching	matching	matching	matching	matching	matching	matching
ATAGDTHLGGEDFDNR	DDGIFEVKATAGDTHL	GGEDFDNRLVNHFVEE	K	A	T	N	R	L	2	1	1	3	0	0	1	3	1	0	1	0	0	1	0	0	2	0	0	0	0	16	0	1674.72	Q27975;Q27965	Q27975	221	236	no	no	2;3	2.396e-17	156	matching	matching	matching	matching	matching	matching	matching	matching
ATDFVVPGPGK	HAYGDQYRATDFVVPG	FVVPGPGKVEISYTPS	R	A	T	G	K	V	1	0	0	1	0	0	0	2	0	0	0	1	0	1	2	0	1	0	0	2	0	11	0	1086.57	Q9XSG3	Q9XSG3	141	151	yes	yes	2	0.028988	77.744	matching	matching	matching	matching	matching	matching	MS/MS	matching
ATEEQLK	ELLKHKPKATEEQLKT	KATEEQLKTVMENFVA	K	A	T	L	K	T	1	0	0	0	0	1	2	0	0	0	1	1	0	0	0	0	1	0	0	0	0	7	0	817.418	P02769;CON__P02769	P02769	562	568	yes	no	2	0.0014255	99.375	matching	matching	matching	matching	matching	matching	matching	matching
ATFMVGSYGPRPEEYEFLTPIEEAPK	RTGVKVDKATFMVGSY	TPIEEAPKGMLARGTY	K	A	T	P	K	G	2	1	0	0	0	0	5	2	0	1	1	1	1	2	4	1	2	0	2	1	0	26	1	2957.42	Q9TU03	Q9TU03	138	163	yes	yes	2;3	6.6534e-48	131.64	matching	matching	matching	matching	matching	MS/MS	matching	matching
ATLHAVDVTLDPDTAHPHLFLYEDSK	LEELKWKRATLHAVDV	LFLYEDSKSVRLEDSR	R	A	T	S	K	S	3	0	0	4	0	0	1	0	3	0	4	1	0	1	2	1	3	0	1	2	0	26	0	2904.43	P18892	P18892	298	323	yes	yes	4	0.0159	46.35	matching	matching	matching	matching	matching	matching	matching	matching
ATLQSELNQIK	IRLATSERATLQSELN	QSELNQIKNWLIFSLG	R	A	T	I	K	N	1	0	1	0	0	2	1	0	0	1	2	1	0	0	0	1	1	0	0	0	0	11	0	1243.68	O02659	O02659	114	124	yes	yes	2	0.0034907	117.14	matching	matching	matching	matching	matching	matching	matching	matching
ATVILNELNWTEALENVFMENRR	________________	NVFMENRRQDPTLLWQ	-	A	T	R	R	Q	2	2	4	0	0	0	4	0	0	1	3	0	1	1	0	0	2	1	0	2	0	23	1	2761.39	F1MX37	F1MX37	1	23	yes	yes	3	0.027468	46.953	matching	matching	matching	matching	matching	matching	matching	matching
ATVLLADINDFSTVNDVYK	CDFTNVVKATVLLADI	STVNDVYKQYFQSSFP	K	A	T	Y	K	Q	2	0	2	3	0	0	0	0	0	1	2	1	0	1	0	1	2	0	1	3	0	19	0	2097.06	Q3T114	Q3T114	79	97	yes	yes	2;3	6.1942e-264	229.96	matching	matching	matching	matching	MS/MS	matching	matching	matching
ATVLNYLPK	RGEAFTLKATVLNYLP	TVLNYLPKCIRVSVQL	K	A	T	P	K	C	1	0	1	0	0	0	0	0	0	0	2	1	0	0	1	0	1	0	1	1	0	9	0	1017.59	Q7SIH1;CON__ENSEMBL:ENSBTAP00000024146	Q7SIH1	814	822	yes	no	2	2.5889e-74	179.81	matching	MS/MS	matching	MS/MS	MS/MS	MS/MS	matching	matching
ATVQQLVGR	________________	TVQQLVGRWRLVESKG	M	A	T	G	R	W	1	1	0	0	0	2	0	1	0	0	1	0	0	0	0	0	1	0	0	2	0	9	0	970.556	P55052;G3N269	P55052	2	10	yes	no	2	6.966e-09	133.23	matching	matching	matching	matching	matching	MS/MS	matching	matching
ATVQVVAGLK	FKIDTVKKATVQVVAG	VQVVAGLKYSIVFIAR	K	A	T	L	K	Y	2	0	0	0	0	1	0	1	0	0	1	1	0	0	0	0	1	0	0	3	0	10	0	984.597	P01044;CON__P01044-1;F1MNV5;CON__Q2KJ62	CON__Q2KJ62	306	315	no	no	2	1.231e-87	201.84	matching	matching	matching	matching	matching	matching	matching	matching
ATVQVVGGLK	FKIDTVKKATVQVVGG	VQVVGGLKYSIVFIAR	K	A	T	L	K	Y	1	0	0	0	0	1	0	2	0	0	1	1	0	0	0	0	1	0	0	3	0	10	0	970.581	P01045;CON__P01045-1	P01045	304	313	yes	no	2	9.7131e-97	199.33	MS/MS	MS/MS	MS/MS	MS/MS	MS/MS	MS/MS	matching	matching
AVDPDGDGHVSWDEYK	AESRAHFRAVDPDGDG	HVSWDEYKVKFLATKG	R	A	V	Y	K	V	1	0	0	4	0	0	1	2	1	0	0	1	0	0	1	1	0	1	1	2	0	16	0	1788.76	Q3ZBZ1;F1MKI5	Q3ZBZ1	141	156	yes	no	2	3.7747e-112	197.73	matching	matching	matching	matching	matching	matching	MS/MS	matching
AVDQLNELSSEANLYR	SYREAVLRAVDQLNEL	SSEANLYRLLELDPPP	R	A	V	Y	R	L	2	1	2	1	0	1	2	0	0	0	3	0	0	0	0	2	0	0	1	1	0	16	0	1820.89	P33046	P33046	41	56	yes	yes	2;3	0	284.24	matching	MS/MS	MS/MS	MS/MS	MS/MS	MS/MS	matching	matching
AVDQLNEQSSEPNIYR	SYREAVLRAVDQLNEQ	SSEPNIYRLLELDQPP	R	A	V	Y	R	L	1	1	2	1	0	2	2	0	0	1	1	0	0	0	1	2	0	0	1	1	0	16	0	1861.88	P22226	P22226	41	56	yes	yes	2;3	0	293.77	matching	MS/MS	MS/MS	MS/MS	MS/MS	MS/MS	matching	MS/MS
AVDQSVLLMRPEAELSAATVYNLLPVK	PQSLCALRAVDQSVLL	VYNLLPVKDLSSFPSS	R	A	V	V	K	D	4	1	1	1	0	1	2	0	0	0	5	1	1	0	2	2	1	0	1	4	0	27	1	2926.58	Q7SIH1;CON__ENSEMBL:ENSBTAP00000024146	Q7SIH1	599	625	yes	no	3	0.011476	49.318	matching	matching	matching	matching	matching	MS/MS	matching	matching
AVEPQLQEEER	ANWSLSNRAVEPQLQE	PQLQEEERMVYVAFSE	R	A	V	E	R	M	1	1	0	0	0	2	4	0	0	0	1	0	0	0	1	0	0	0	0	1	0	11	0	1326.64	Q58DL9	Q58DL9	266	276	yes	yes	2	0.030781	84.169	matching	matching	matching	matching	matching	matching	matching	matching
AVFDNISR	ANCRETLRAVFDNISR	AVFDNISRGAFYLPIT	R	A	V	S	R	G	1	1	1	1	0	0	0	0	0	1	0	0	0	1	0	1	0	0	0	1	0	8	0	920.472	E1BCU6	E1BCU6	266	273	yes	yes	2	0.0078159	97.965	matching	matching	matching	matching	MS/MS	matching	matching	matching
AVFPSIVGR	FAGDDAPRAVFPSIVG	VFPSIVGRPRHQGVMV	R	A	V	G	R	P	1	1	0	0	0	0	0	1	0	1	0	0	0	1	1	1	0	0	0	2	0	9	0	944.544	P63258;P60712;F1MRD0;Q5E9B5;F1MKC4;Q3ZC07;P68138;P62739;G8JKX4	P63258	29	37	no	no	2	0.032477	85.67	matching	matching	matching	matching	matching	matching	matching	matching
AVFVDLEPTVIDEVR	GAGKHVPRAVFVDLEP	PTVIDEVRTGTYRQLF	R	A	V	V	R	T	1	1	0	2	0	0	2	0	0	1	1	0	0	1	1	0	1	0	0	4	0	15	0	1700.9	Q3ZCJ7;P81947;F2Z4C1;Q2HJ86;F1MNF8	Q3ZCJ7	65	79	yes	no	2	0.00022531	105.14	matching	matching	matching	matching	matching	matching	matching	matching
AVGEPPLFLGASVFFAIK	KKAIYASKAVGEPPLF	ASVFFAIKDAIRAARA	K	A	V	I	K	D	3	0	0	0	0	0	1	2	0	1	2	1	0	3	2	1	0	0	0	2	0	18	0	1862.03	P80457;F1MUT3	P80457	1258	1275	yes	no	2	0.021345	70.837	matching	matching	matching	matching	matching	matching	MS/MS	MS/MS
AVIDDAFAR	NYSEDLPRAVIDDAFA	VIDDAFARAFALWSAV	R	A	V	A	R	A	3	1	0	2	0	0	0	0	0	1	0	0	0	1	0	0	0	0	0	1	0	9	0	976.498	P52176;F1MF56	P52176	135	143	yes	no	2	1.0683e-05	105.52	matching	matching	MS/MS	MS/MS	matching	matching	matching	matching
AVLDVGEEGTEGAAATGVK	EVSQVVHKAVLDVGEE	GAAATGVKVGITSINN	K	A	V	V	K	V	4	0	0	1	0	0	3	4	0	0	1	1	0	0	0	0	2	0	0	3	0	19	0	1772.88	A6QPQ2;A0A0A0MP89	A6QPQ2	358	376	yes	no	2	0	261.06	matching	matching	matching	matching	matching	MS/MS	matching	matching
AVPVMLDDLATETDVSLSMLTETKK	AEDMEKNRAVPVMLDD	SMLTETKKSPGEIANT	R	A	V	K	K	S	2	0	0	3	0	0	2	0	0	0	4	2	2	0	1	2	4	0	0	3	0	25	1	2706.37	F1MUI1	F1MUI1	510	534	yes	yes	2;3	0.0010647	65.833	matching	MS/MS	MS/MS	matching	matching	matching	matching	matching
AVSSAIAQLLGEVAQGNENYAGIAAR	QDLGNSTKAVSSAIAQ	NYAGIAARDVAGGLRS	K	A	V	A	R	D	7	1	2	0	0	2	2	3	0	2	2	0	0	0	0	2	0	0	1	2	0	26	0	2572.32	F1MDH3	F1MDH3	1106	1131	yes	yes	3	1.2518e-15	95.209	matching	matching	matching	matching	matching	matching	matching	matching
AVTEQGAELSNEER	DDMATCMKAVTEQGAE	AELSNEERNLLSVAYK	K	A	V	E	R	N	2	1	1	0	0	1	4	1	0	0	1	0	0	0	0	1	1	0	0	1	0	14	0	1531.71	Q3SZI4	Q3SZI4	28	41	yes	yes	2	2.8531e-38	158.65	matching	matching	matching	matching	matching	MS/MS	matching	matching
AVYLQYTDENFR	RIGSVYKKAVYLQYTD	QYTDENFRTVIEKPVW	K	A	V	F	R	T	1	1	1	1	0	1	1	0	0	0	1	0	0	1	0	0	1	0	2	1	0	12	0	1517.72	F1N076;CON__ENSEMBL:ENSBTAP00000031900	F1N076	70	81	no	no	2	1.2891e-225	222.25	matching	matching	MS/MS	MS/MS	matching	matching	matching	matching
AWQSASEAQGSFVYTK	NALFCLERAWQSASEA	QGSFVYTKALLAYAFA	R	A	W	T	K	A	3	0	0	0	0	2	1	1	0	0	0	1	0	1	0	3	1	1	1	1	0	16	0	1758.82	F1MI18;F1MJK3	F1MI18	1133	1148	yes	no	2	3.8362e-15	148.15	matching	matching	matching	matching	matching	matching	matching	matching
AYEDAAEEFHPYIPFFATFDSK	NKDSEHYKAYEDAAEE	FFATFDSKVAKKLTLK	K	A	Y	S	K	V	4	0	0	2	0	0	3	0	1	1	0	1	0	4	2	1	1	0	2	0	0	22	0	2594.16	Q05JF3	Q05JF3	196	217	yes	yes	3	9.0715e-30	135.79	matching	MS/MS	MS/MS	MS/MS	MS/MS	MS/MS	MS/MS	MS/MS
AYKEELEGQLGPMAQETQAR	EETMKEVKAYKEELEG	MAQETQARVSKELQAA	K	A	Y	A	R	V	3	1	0	0	0	3	4	2	0	0	2	1	1	0	1	0	1	0	1	0	0	20	1	2248.08	Q03247;CON__Q03247	Q03247	90	109	yes	no	2;3	1.5524e-102	174.81	MS/MS	MS/MS	matching	matching	matching	MS/MS	MS/MS	MS/MS
AYSMLTITER	QSSPITFRAYSMLTIT	SMLTITERDWLSQNVY	R	A	Y	E	R	D	1	1	0	0	0	0	1	0	0	1	1	0	1	0	0	1	2	0	1	0	0	10	0	1183.59	CON__Q1RMK2;G5E5T5	CON__Q1RMK2	323	332	yes	no	2	2.7877e-73	184.71	matching	MS/MS	MS/MS	matching	MS/MS	MS/MS	MS/MS	MS/MS
AYYEDSPQQVFSAEFEVK	NMGVWKIKAYYEDSPQ	FSAEFEVKEYVLPSFE	K	A	Y	V	K	E	2	0	0	1	0	2	3	0	0	0	0	1	0	2	1	2	0	0	2	2	0	18	0	2135.97	Q2UVX4;CON__Q2UVX4;G3X7A5	Q2UVX4	207	224	yes	no	2;3	0	223.93	matching	MS/MS	MS/MS	MS/MS	MS/MS	MS/MS	MS/MS	MS/MS
AYYHLLEQVAPK	SSDIKDSKAYYHLLEQ	LLEQVAPKGDEEGIPA	K	A	Y	P	K	G	2	0	0	0	0	1	1	0	1	0	2	1	0	0	1	0	0	0	2	1	0	12	0	1430.76	F1MYX5	F1MYX5	298	309	yes	yes	2;3	9.7747e-19	150.09	matching	matching	matching	matching	MS/MS	MS/MS	matching	matching
CKSELERSQQAAQSADVSLNSCLTPQK	KLEQELKRCKSELERS	NSCLTPQKIFATPLTP	R	C	K	Q	K	I	3	1	1	1	2	4	2	0	0	0	3	2	0	0	1	5	1	0	0	1	0	27	2	3034.44	F1N1F8	F1N1F8	121	147	yes	yes	4	0.0078108	52.754	matching	matching	matching	matching	matching	matching	matching	matching
CPPGTFLK	SRQLMCDKCPPGTFLK	CPPGTFLKQPCTARRK	K	C	P	L	K	Q	0	0	0	0	1	0	0	1	0	0	1	1	0	1	2	0	1	0	0	0	0	8	0	918.463	A5D7R1	A5D7R1	44	51	yes	yes	2	0.00032911	110.81	matching	matching	matching	matching	matching	matching	matching	matching
DAAGGPGAPADPGRPTGYSGSSK	FFAKESVKDAAGGPGA	TGYSGSSKALVSTLVP	K	D	A	S	K	A	4	1	0	2	0	0	0	6	0	0	0	1	0	0	4	3	1	0	1	0	0	23	1	2071.96	P81265;F6PQI6;F1MR22;G5E6M1	P81265	608	630	yes	no	2;3	1.4931e-83	169.7	MS/MS	MS/MS	MS/MS	MS/MS	matching	MS/MS	MS/MS	MS/MS
DADTWFK	CPKFMKKKDADTWFKE	KDADTWFKELDINQDG	K	D	A	F	K	E	1	0	0	2	0	0	0	0	0	0	0	1	0	1	0	0	1	1	0	0	0	7	0	881.392	P28782	P28782	50	56	yes	yes	2	6.6651e-24	145.04	matching	matching	matching	matching	matching	matching	matching	matching
DAEAFYASEVLSINFK	KLLDKFRKDAEAFYAS	EVLSINFKDSEAAVKL	K	D	A	F	K	D	3	0	1	1	0	0	2	0	0	1	1	1	0	2	0	2	0	0	1	1	0	16	0	1802.87	A0A0A0MPA0	A0A0A0MPA0	153	168	yes	yes	2;3	0	239.51	matching	MS/MS	MS/MS	MS/MS	MS/MS	MS/MS	MS/MS	MS/MS
DAEAFYASEVLSTNFK	KLLDKFRKDAEAFYAS	EVLSTNFKDSEAAVKL	K	D	A	F	K	D	3	0	1	1	0	0	2	0	0	0	1	1	0	2	0	2	1	0	1	1	0	16	0	1790.84	CON__REFSEQ:XP_001252647;A0A0A0MP92;CON__A2I7N3;A2I7N3	CON__REFSEQ:XP_001252647	153	168	no	no	2;3	0	257.48	MS/MS	MS/MS	MS/MS	MS/MS	MS/MS	MS/MS	MS/MS	MS/MS
DAEGILEDLQSYR	NQVNVVLKDAEGILED	LEDLQSYRGAGHEIRE	K	D	A	Y	R	G	1	1	0	2	0	1	2	1	0	1	2	0	0	0	0	1	0	0	1	0	0	13	0	1507.72	Q2KJI3	Q2KJI3	45	57	yes	yes	2	1.4445e-155	195.71	matching	matching	matching	matching	matching	matching	matching	matching
DAFAADVVLPESFDAR	GGPKLPQRDAFAADVV	LPESFDAREQWPNCPT	R	D	A	A	R	E	4	1	0	3	0	0	1	0	0	0	1	0	0	2	1	1	0	0	0	2	0	16	0	1721.83	P07688	P07688	72	87	yes	yes	2	1.1159e-09	136.34	matching	matching	matching	matching	matching	MS/MS	matching	matching
DAFDRNPGLQNLLLDDFFK	SVFLGKIKDAFDRNPG	LLLDDFFKSAVENCQD	K	D	A	F	K	S	1	1	2	4	0	1	0	1	0	0	4	1	0	3	1	0	0	0	0	0	0	19	1	2237.11	Q3ZCI4	Q3ZCI4	378	396	yes	yes	3	0.0010452	82.755	matching	matching	matching	matching	matching	MS/MS	matching	matching
DAFLGSFLYEYSR	CKNYQEAKDAFLGSFL	SFLYEYSRRHPEYAVS	K	D	A	S	R	R	1	1	0	1	0	0	1	1	0	0	2	0	0	2	0	2	0	0	2	0	0	13	0	1566.74	P02769;CON__P02769	P02769	347	359	yes	no	1;2;3	0	270.93	MS/MS	MS/MS	MS/MS	MS/MS	MS/MS	MS/MS	MS/MS	MS/MS
DAGTIAGLNVLR	DSQRQATKDAGTIAGL	IAGLNVLRIINEPTAA	K	D	A	L	R	I	2	1	1	1	0	0	0	2	0	1	2	0	0	0	0	0	1	0	0	1	0	12	0	1198.67	P19120	P19120	160	171	yes	yes	2	1.8406e-11	140.91	matching	matching	matching	matching	matching	matching	matching	matching
DAGVIAGLNVLR	DSQRQATKDAGVIAGL	IAGLNVLRIINEPTAA	K	D	A	L	R	I	2	1	1	1	0	0	0	2	0	1	2	0	0	0	0	0	0	0	0	2	0	12	0	1196.69	Q27975;Q27965	Q27975	160	171	no	no	2	2.5574e-05	132.5	matching	matching	matching	matching	matching	MS/MS	matching	matching
DAILDALENLTADELKK	________________	LTADELKKFKMKLLSV	R	D	A	K	K	F	3	0	1	3	0	0	2	0	0	1	4	2	0	0	0	0	1	0	0	0	0	17	1	1870.99	Q8HXK9	Q8HXK9	6	22	yes	yes	3	0.026913	49.595	matching	matching	matching	matching	matching	matching	matching	matching
DAIPENLPPLTADFAEDK	HCIAEVEKDAIPENLP	TADFAEDKDVCKNYQE	K	D	A	D	K	D	3	0	1	3	0	0	2	0	0	1	2	1	0	1	3	0	1	0	0	0	0	18	0	1954.95	P02769;CON__P02769	P02769	319	336	yes	no	2;3	7.4994e-13	130.02	MS/MS	MS/MS	matching	MS/MS	MS/MS	MS/MS	MS/MS	matching
DALSSVQESQVAQQAR	KEATKTAKDALSSVQE	SQVAQQARDWMTESFS	K	D	A	A	R	D	3	1	0	1	0	4	1	0	0	0	1	0	0	0	0	3	0	0	0	2	0	16	0	1715.84	P19035	P19035	45	60	yes	yes	2;3	0	242.93	matching	matching	matching	MS/MS	matching	MS/MS	matching	matching
DAPSPVDAAFR	QLISERWKDAPSPVDA	SPVDAAFRYDRNSVLL	K	D	A	F	R	Y	3	1	0	2	0	0	0	0	0	0	0	0	0	1	2	1	0	0	0	1	0	11	0	1144.55	Q3SZV7;CON__Q3SZV7	Q3SZV7	94	104	yes	no	1;2	7.4771e-17	156.58	matching	MS/MS	MS/MS	matching	MS/MS	MS/MS	matching	MS/MS
DATNVGDEGGFAPNILENK	VIKEKYGKDATNVGDE	APNILENKEALELLKN	K	D	A	N	K	E	2	0	3	2	0	0	2	3	0	1	1	1	0	1	1	0	1	0	0	1	0	19	0	1959.92	Q9XSJ4;F1MB08	Q9XSJ4	203	221	yes	no	2;3	0	283.83	matching	matching	matching	matching	MS/MS	MS/MS	matching	matching
DDAQEEKGDAEEGEEEATR	NRRKDVERDDAQEEKG	EGEEEATRGQASVVEA	R	D	D	T	R	G	3	1	0	3	0	1	7	2	0	0	0	1	0	0	0	0	1	0	0	0	0	19	1	2106.85	E1BG05;G3MXE5	E1BG05	546	564	yes	no	3	1.1564e-13	133.93	matching	matching	matching	matching	matching	matching	matching	matching
DDDKNNDGYIDYAEFAK	NLIDGVLRDDDKNNDG	IDYAEFAKSLQ_____	R	D	D	A	K	S	2	0	2	5	0	0	1	1	0	1	0	2	0	1	0	0	0	0	2	0	0	17	1	1991.84	F6PZ29	F6PZ29	126	142	yes	yes	2;3	9.6641e-10	127.05	MS/MS	matching	matching	matching	matching	matching	matching	matching
DDETMYVESKK	NRAVIHYRDDETMYVE	TMYVESKKDRVTVVFS	R	D	D	K	K	D	0	0	0	2	0	0	2	0	0	0	0	2	1	0	0	1	1	0	1	1	0	11	1	1343.59	Q3MHR7	Q3MHR7	148	158	yes	yes	3	0.040049	58.699	matching	matching	matching	matching	matching	matching	matching	matching
DDFTSLSMVLYSR	KDLASLGRDDFTSLSM	LSMVLYSRKFPSGTFE	R	D	D	S	R	K	0	1	0	2	0	0	0	0	0	0	2	0	1	1	0	3	1	0	1	1	0	13	0	1532.72	F1N5M2;CON__ENSEMBL:ENSBTAP00000018229	F1N5M2	38	50	yes	no	2	0	258.65	matching	MS/MS	MS/MS	MS/MS	MS/MS	MS/MS	MS/MS	matching
DDGGGEPESMEPR	TLGPWGQRDDGGGEPE	EPESMEPRWGRLKGSN	R	D	D	P	R	W	0	1	0	2	0	0	3	3	0	0	0	0	1	0	2	1	0	0	0	0	0	13	0	1374.54	CON__ENSEMBL:ENSBTAP00000018574;A6QPP2	CON__ENSEMBL:ENSBTAP00000018574	28	40	yes	no	2	0.0013151	122.64	matching	matching	matching	matching	matching	MS/MS	matching	matching
DDGLFSGDPNWFPK	LGGLAVARDDGLFSGD	GDPNWFPKKSKENPRY	R	D	D	P	K	K	0	0	1	3	0	0	0	2	0	0	1	1	0	2	2	1	0	1	0	0	0	14	0	1593.71	Q5E9F5	Q5E9F5	140	153	yes	yes	2	4.7972e-05	147.52	matching	matching	matching	matching	matching	MS/MS	matching	matching
DDGSFHDPFPVMDR	MWLLSQQRDDGSFHDP	DPFPVMDRSMQGGLVG	R	D	D	D	R	S	0	1	0	4	0	0	0	1	1	0	0	0	1	2	2	1	0	0	0	1	0	14	0	1633.68	CON__ENSEMBL:ENSBTAP00000007350	CON__ENSEMBL:ENSBTAP00000007350	1112	1125	yes	yes	3	0.0029231	89.43	matching	matching	matching	matching	matching	matching	matching	matching
DDKESVPISDTIIPAVPPPTDLR	NVSVYTVKDDKESVPI	VPPPTDLRFTNVGPDT	K	D	D	L	R	F	1	1	0	4	0	0	1	0	0	3	1	1	0	0	5	2	2	0	0	2	0	23	1	2474.29	B8Y9S9	B8Y9S9	1253	1275	yes	yes	3	5.9681e-05	92.932	matching	MS/MS	matching	matching	matching	MS/MS	matching	matching
DDPLTNLNTAFDVAEK	IDYGKLRKDDPLTNLN	TAFDVAEKYLDIPKML	K	D	D	E	K	Y	2	0	2	3	0	0	1	0	0	0	2	1	0	1	1	0	2	0	0	1	0	16	0	1761.84	Q3B7N2	Q3B7N2	199	214	yes	yes	2	6.5483e-126	185.99	matching	matching	matching	matching	matching	matching	matching	matching
DDPQTHHYVVAVVK	VAEFYGSKDDPQTHHY	HYVVAVVKKGSNFQLN	K	D	D	V	K	K	1	0	0	2	0	1	0	0	2	0	0	1	0	0	1	0	1	0	1	4	0	14	0	1606.81	E1BI82;CON__Q2HJF0	CON__Q2HJF0	108	121	no	no	3	0.00040123	103.14	matching	matching	matching	matching	matching	MS/MS	matching	matching
DDPVTNLNNAFEVAEK	IEYDKLRKDDPVTNLN	NAFEVAEKYLDIPKML	K	D	D	E	K	Y	2	0	3	2	0	0	2	0	0	0	1	1	0	1	1	0	1	0	0	2	0	16	0	1774.84	A5D7D1	A5D7D1	218	233	yes	yes	2	0.0008515	119.51	matching	matching	matching	matching	matching	matching	matching	matching
DDQVTVIGAGVTLHEALAAADLLK	AKVVLKNKDDQVTVIG	LAAADLLKREKINIRV	K	D	D	L	K	R	5	0	0	3	0	1	1	2	1	1	4	1	0	0	0	0	2	0	0	3	0	24	0	2419.3	A7E3W4;A7Z014;Q6B855	A7E3W4	473	496	yes	no	3	5.3371e-06	105.51	matching	matching	matching	matching	matching	MS/MS	matching	matching
DDRFPVAFLAPVMNLPEEHSR	FKGEIFSRDDRFPVAF	NLPEEHSRMVYFAISD	R	D	D	S	R	M	2	2	1	2	0	0	2	0	1	0	2	0	1	2	3	1	0	0	0	2	0	21	1	2439.2	Q2TBI0;F1MNN7	Q2TBI0	255	275	yes	no	3;4	5.3609e-146	183.21	matching	matching	matching	matching	MS/MS	MS/MS	matching	matching
DDSSAVIWVTFK	RTAYNLVRDDSSAVIW	AVIWVTFKYDGSTIVP	R	D	D	F	K	Y	1	0	0	2	0	0	0	0	0	1	0	1	0	1	0	2	1	1	0	2	0	12	0	1366.68	Q2HJ57	Q2HJ57	19	30	yes	yes	2	2.5574e-05	147.24	matching	matching	matching	matching	matching	MS/MS	matching	matching
DEASSVEVTWPDGK	VAHFGLGKDEASSVEV	EVTWPDGKMASRNVAS	K	D	E	G	K	M	1	0	0	2	0	0	2	1	0	0	0	1	0	0	1	2	1	1	0	2	0	14	0	1518.68	F1MFI4	F1MFI4	494	507	yes	yes	2	0.0079558	107.74	matching	matching	matching	matching	matching	matching	MS/MS	matching
DFATVYVEAIK	QSSWDRVKDFATVYVE	TVYVEAIKDSGRDYVA	K	D	F	I	K	D	2	0	0	1	0	0	1	0	0	1	0	1	0	1	0	0	1	0	1	2	0	11	0	1254.65	P15497;CON__P15497	P15497	36	46	yes	no	1;2	7.3458e-82	181.4	MS/MS	MS/MS	MS/MS	MS/MS	MS/MS	MS/MS	matching	matching
DFDFFGQNQNTRSK	FNFDDLFKDFDFFGQN	QNQNTRSKKHFENHFQ	K	D	F	S	K	K	0	1	2	2	0	2	0	1	0	0	0	1	0	3	0	1	1	0	0	0	0	14	1	1702.77	G3MZ88	G3MZ88	121	134	yes	yes	2	0.020007	91.202	matching	matching	matching	matching	matching	matching	matching	MS/MS
DFEQNTDGSGQVIVSIGVPR	SGSTSKNRDFEQNTDG	IVSIGVPRTISEVQLS	R	D	F	P	R	T	0	1	1	2	0	2	1	3	0	2	0	0	0	1	1	2	1	0	0	3	0	20	0	2117.04	CON__ENSEMBL:ENSBTAP00000007350;F1MVK1	CON__ENSEMBL:ENSBTAP00000007350	419	438	no	no	2	2.2537e-11	96.455	matching	matching	matching	matching	matching	matching	matching	matching
DFGHIQYVAAYR	GIITQGARDFGHIQYV	IQYVAAYRVAYGDDGV	R	D	F	Y	R	V	2	1	0	1	0	1	0	1	1	1	0	0	0	1	0	0	0	0	2	1	0	12	0	1438.7	Q95114;F1MXX6;G3MYW7	Q95114	349	360	yes	no	3	0.0076819	94.767	matching	MS/MS	matching	matching	matching	matching	matching	matching
DFHQEVFLGK	EMDGHLNKDFHQEVFL	HQEVFLGKDMDDFEED	K	D	F	G	K	D	0	0	0	1	0	1	1	1	1	0	1	1	0	2	0	0	0	0	0	1	0	10	0	1218.6	Q3ZBZ1	Q3ZBZ1	69	78	yes	yes	2;3	0.0003787	131.62	matching	matching	matching	matching	matching	matching	MS/MS	matching
DFHVDEQTTVK	EMKHTTERDFHVDEQT	VDEQTTVKVPMMNRLG	R	D	F	V	K	V	0	0	0	2	0	1	1	0	1	0	0	1	0	1	0	0	2	0	0	2	0	11	0	1317.62	P34955;CON__P34955	P34955	229	239	yes	no	2;3	4.7297e-34	170.4	MS/MS	MS/MS	matching	MS/MS	MS/MS	MS/MS	MS/MS	MS/MS
DFILLNVPIPQEQAR	DFSLSSDRDFILLNVP	PIPQEQARVCRLHLLR	R	D	F	A	R	V	1	1	1	1	0	2	1	0	0	2	2	0	0	1	2	0	0	0	0	1	0	15	0	1751.96	CON__ENSEMBL:ENSBTAP00000007350;F1MVK1	CON__ENSEMBL:ENSBTAP00000007350	81	95	no	no	2	0.0051641	84.508	matching	matching	matching	MS/MS	matching	matching	matching	matching
DFLFLGTNVR	DPILQIHKDFLFLGTN	LFLGTNVRYLRV____	K	D	F	V	R	Y	0	1	1	1	0	0	0	1	0	0	2	0	0	2	0	0	1	0	0	1	0	10	0	1180.62	Q2TBI0;F1MNN7	Q2TBI0	468	477	yes	no	2	8.6867e-169	202.96	matching	MS/MS	matching	MS/MS	MS/MS	MS/MS	matching	matching
DFLGLSEIK	ILQIYKQRDFLGLSEI	FLGLSEIKFRPGSVVV	R	D	F	I	K	F	0	0	0	1	0	0	1	1	0	1	2	1	0	1	0	1	0	0	0	0	0	9	0	1020.55	Q8WML4	Q8WML4	414	422	yes	yes	2	0.00027688	128.91	matching	matching	matching	matching	matching	matching	MS/MS	MS/MS
DFNIPGFPTVR	ETNSAVCRDFNIPGFP	IPGFPTVRFFKAFSKT	R	D	F	V	R	F	0	1	1	1	0	0	0	1	0	1	0	0	0	2	2	0	1	0	0	1	0	11	0	1261.65	F1MM32	F1MM32	113	123	yes	yes	2	0.00083503	120.03	matching	matching	MS/MS	MS/MS	MS/MS	MS/MS	matching	matching
DFNVGDYIQAVLDR	APNDFNLRDFNVGDYI	YIQAVLDRNLAENISR	R	D	F	D	R	N	1	1	1	3	0	1	0	1	0	1	1	0	0	1	0	0	0	0	1	2	0	14	0	1623.79	Q0VCM4	Q0VCM4	257	270	yes	yes	2	1.7113e-115	186.77	matching	matching	matching	matching	matching	matching	matching	matching
DFQNDITGIR	GTYFSTSRDFQNDITG	QNDITGIRVFIGPLGL	R	D	F	I	R	V	0	1	1	2	0	1	0	1	0	2	0	0	0	1	0	0	1	0	0	0	0	10	0	1177.57	G3MZ19	G3MZ19	34	43	yes	yes	2	1.2771e-116	196.16	matching	matching	matching	matching	matching	matching	matching	matching
DFSALESQLQDTQELLQEENR	SKSSKLTKDFSALESQ	ELLQEENRQKLSLSTK	K	D	F	N	R	Q	1	1	1	2	0	4	4	0	0	0	4	0	0	1	0	2	1	0	0	0	0	21	0	2492.17	F1MQ37	F1MQ37	1302	1322	yes	yes	2;3	0.0048319	66.448	matching	matching	matching	matching	matching	matching	matching	matching
DFSELEPDKFQNK	IVKTQVFKDFSELEPD	EPDKFQNKTNGITPRR	K	D	F	N	K	T	0	0	1	2	0	1	2	0	0	0	1	2	0	2	1	1	0	0	0	0	0	13	1	1595.75	Q0VCM4	Q0VCM4	471	483	yes	yes	2	0.039955	80.312	matching	matching	matching	matching	matching	matching	matching	matching
DFTMPMQDQLYFIK	LVKSPEMKDFTMPMQD	QDQLYFIKRSMTILMH	K	D	F	I	K	R	0	0	0	2	0	2	0	0	0	1	1	1	2	2	1	0	1	0	1	0	0	14	0	1775.83	Q2KIH2;CON__Q2KIH2	Q2KIH2	218	231	yes	no	2	0.027272	58.595	matching	matching	matching	matching	matching	matching	matching	matching
DFTNFEITIR	KSNFIGYKDFTNFEIT	TNFEITIRARYFYNKV	K	D	F	I	R	A	0	1	1	1	0	0	1	0	0	2	0	0	0	2	0	0	2	0	0	0	0	10	0	1254.62	F1MY85;CON__Q1A7A4	F1MY85	242	251	no	no	2	0.031529	83.045	matching	matching	matching	matching	matching	matching	matching	matching
DFVHFDDTSEPPTETVR	RAEMGRNRDFVHFDDT	EPPTETVRKYFPETWI	R	D	F	V	R	K	0	1	0	3	0	0	2	0	1	0	0	0	0	2	2	1	3	0	0	2	0	17	0	1990.89	Q7SIH1;CON__ENSEMBL:ENSBTAP00000024146	Q7SIH1	718	734	yes	no	2;3	8.9693e-80	183.76	matching	MS/MS	matching	MS/MS	matching	matching	matching	matching
DFVPNSVSFSWK	VALGCLARDFVPNSVS	NSVSFSWKFNNSTVSS	R	D	F	W	K	F	0	0	1	1	0	0	0	0	0	0	0	1	0	2	1	3	0	1	0	2	0	12	0	1411.68	CON__Q1RMK2;G5E5T5	CON__Q1RMK2	174	185	yes	no	2	8.2067e-18	155.66	matching	MS/MS	MS/MS	matching	matching	MS/MS	MS/MS	MS/MS
DFVQPPTR	KCDLYPVKDFVQPPTR	DFVQPPTRLCAGCPKP	K	D	F	T	R	L	0	1	0	1	0	1	0	0	0	0	0	0	0	1	2	0	1	0	0	1	0	8	0	958.487	P01044;CON__P01044-1;F1MNV5;CON__Q2KJ62	CON__Q2KJ62	254	261	no	no	2	0.012576	89.698	matching	matching	matching	matching	matching	matching	matching	MS/MS
DGAVSFEEFVVLVSR	FQDLDADKDGAVSFEE	EFVVLVSRVLKTAHID	K	D	G	S	R	V	1	1	0	1	0	0	2	1	0	0	1	0	0	2	0	2	0	0	0	4	0	15	0	1652.84	P79105;G3N2H5	P79105	66	80	yes	no	2;3	6.2383e-59	129.29	matching	matching	matching	matching	matching	matching	matching	matching
DGEEAGTGDPLLEATSK	NSKSSEAKDGEEAGTG	PLLEATSKSGDEKDVS	K	D	G	S	K	S	2	0	0	2	0	0	3	3	0	0	2	1	0	0	1	1	2	0	0	0	0	17	0	1688.77	F1MHL1;Q5EAC6	F1MHL1	323	339	yes	no	2	8.9439e-05	124.68	matching	matching	matching	matching	matching	matching	matching	matching
DGEVLLEALYLTVDPYMR	TVELPPLKDGEVLLEA	LTVDPYMRIMAKSLKE	K	D	G	M	R	I	1	1	0	2	0	0	2	1	0	0	4	0	1	0	1	0	1	0	2	2	0	18	0	2096.05	F1N2W0;Q3SZJ4	F1N2W0	34	51	yes	no	3	0.011731	61.962	matching	matching	matching	matching	matching	matching	matching	matching
DGFIDKEDLHDMLASLGK	FNMIDQNRDGFIDKED	DMLASLGKNPTDAYLE	R	D	G	G	K	N	1	0	0	4	0	0	1	2	1	1	3	2	1	1	0	1	0	0	0	0	0	18	1	2002.97	A4IF97;Q5E9E2	A4IF97	45	62	yes	no	3	0.020277	69.111	matching	matching	matching	matching	matching	MS/MS	matching	matching
DGFIDLMELK	FKEYDAGRDGFIDLME	FIDLMELKLMMEKLGA	R	D	G	L	K	L	0	0	0	2	0	0	1	1	0	1	2	1	1	1	0	0	0	0	0	0	0	10	0	1179.58	A5D7A0;Q17QM6	A5D7A0	111	120	yes	no	2	7.1696e-17	147.74	matching	matching	matching	matching	matching	MS/MS	matching	matching
DGFVQDEGATFPVGK	CSSPPALKDGFVQDEG	GATFPVGKNIMYTCKE	K	D	G	G	K	N	1	0	0	2	0	1	1	3	0	0	0	1	0	2	1	0	1	0	0	2	0	15	0	1565.74	Q29RQ1;F1N045;CON__Q29RQ1	Q29RQ1	579	593	yes	no	2	0.00041824	110.22	matching	MS/MS	matching	matching	MS/MS	matching	matching	matching
DGGIDPLVR	FNTWRIIKDGGIDPLV	GGIDPLVRGLLAKKSK	K	D	G	V	R	G	0	1	0	2	0	0	0	2	0	1	1	0	0	0	1	0	0	0	0	1	0	9	0	940.498	P80025;G3MXZ0	P80025	506	514	yes	no	2	6.4687e-18	152.06	MS/MS	MS/MS	MS/MS	MS/MS	MS/MS	MS/MS	MS/MS	MS/MS
DGLAFNALIHR	QNFHISWKDGLAFNAL	AFNALIHRHRPELIEY	K	D	G	H	R	H	2	1	1	1	0	0	0	1	1	1	2	0	0	1	0	0	0	0	0	0	0	11	0	1225.66	A5D7D1;E1BLT3	A5D7D1	194	204	yes	no	3	0.033597	61.593	matching	matching	matching	matching	matching	matching	matching	matching
DGQVINETSQHHDDLE	LIKTVETRDGQVINET	SQHHDDLE________	R	D	G	L	E	-	0	0	1	3	0	2	2	1	2	1	1	0	0	0	0	1	1	0	0	1	0	16	0	1835.79	P48616	P48616	451	466	yes	yes	2;3	6.7127e-171	194.77	matching	matching	matching	matching	matching	MS/MS	matching	matching
DGSGFLINLIDSPGHVDFSSEVTAALR	LNFIKQSKDGSGFLIN	SEVTAALRVTDGALVV	K	D	G	L	R	V	2	1	1	3	0	0	1	3	1	2	3	0	0	2	1	4	1	0	0	2	0	27	0	2816.4	Q3SYU2	Q3SYU2	94	120	yes	yes	3	5.2753e-08	94.019	matching	matching	matching	matching	matching	matching	matching	matching
DGSYGAWLHR	RIQEFRKRDGSYGAWL	SYGAWLHRDSSTWLTA	R	D	G	H	R	D	1	1	0	1	0	0	0	2	1	0	1	0	0	0	0	1	0	1	1	0	0	10	0	1160.54	E1BH06;CON__P01030;P01030;CON__ENSEMBL:ENSBTAP00000007350	CON__ENSEMBL:ENSBTAP00000007350	1062	1071	no	no	2	0.0095491	95.775	matching	matching	matching	matching	matching	MS/MS	matching	matching
DGVGQEPVHLESPAHEHR	TQEFQLLKDGVGQEPV	ESPAHEHRFPLGPVTS	K	D	G	H	R	F	1	1	0	1	0	1	3	2	3	0	1	0	0	0	2	1	0	0	0	2	0	18	0	1992.94	Q2KJF1;CON__Q2KJF1	Q2KJF1	63	80	yes	no	2;3;4	4.7642e-28	156.72	MS/MS	MS/MS	matching	MS/MS	MS/MS	MS/MS	MS/MS	matching
DGVSAAVITAELASFLATK	CCPFVLDKDGVSAAVI	LASFLATKNLSLSQQL	K	D	G	T	K	N	5	0	0	1	0	0	1	1	0	1	2	1	0	1	0	2	2	0	0	2	0	19	0	1863	A6QQ11	A6QQ11	454	472	yes	yes	2	7.3028e-20	138.97	matching	matching	matching	matching	matching	matching	matching	matching
DGWQIEEADDWLR	GIFNQKIRDGWQIEEA	EEADDWLRHGNPWEKA	R	D	G	L	R	H	1	1	0	3	0	1	2	1	0	1	1	0	0	0	0	0	0	2	0	0	0	13	0	1631.72	Q0VCM4	Q0VCM4	173	185	yes	yes	2	6.8322e-08	134.4	matching	matching	matching	matching	matching	matching	matching	matching
DGWVPVPR	GTDATCTRDGWVPVPR	DGWVPVPRCAWKPCSY	R	D	G	P	R	C	0	1	0	1	0	0	0	1	0	0	0	0	0	0	2	0	0	1	0	2	0	8	0	924.482	Q28085;CON__Q28085	Q28085	312	319	yes	no	2	0.0068897	90.37	matching	matching	matching	matching	matching	matching	matching	matching
DGYQATTQGQLK	CAAHLTQRDGYQATTQ	ATTQGQLKERLYQEII	R	D	G	L	K	E	1	0	0	1	0	3	0	2	0	0	1	1	0	0	0	0	2	0	1	0	0	12	0	1308.63	F1MIX6	F1MIX6	1262	1273	yes	yes	2	0.011422	66.267	matching	matching	matching	matching	matching	matching	matching	matching
DGYVLSLNR	QDINRDRKDGYVLSLN	GYVLSLNRVSDAREHR	K	D	G	N	R	V	0	1	1	1	0	0	0	1	0	0	2	0	0	0	0	1	0	0	1	1	0	9	0	1035.53	Q58D62;CON__Q58D62	Q58D62	58	66	yes	no	2	0.037763	82.261	matching	matching	matching	matching	matching	matching	matching	matching
DHEAQGSPNIDVFLGHINVEDITK	AAHTINPKDHEAQGSP	INVEDITKLSNHPVRR	K	D	H	T	K	L	1	0	2	3	0	1	2	2	2	3	1	1	0	1	1	1	1	0	0	2	0	24	0	2647.29	A5D9E9	A5D9E9	508	531	yes	yes	3	4.4905e-196	191.73	matching	MS/MS	matching	matching	matching	MS/MS	matching	matching
DHGMPGYNSWR	AINLQRCRDHGMPGYN	MPGYNSWRGFCGLSQP	R	D	H	W	R	G	0	1	1	1	0	0	0	2	1	0	0	0	1	0	1	1	0	1	1	0	0	11	0	1318.55	P80025;G3MXZ0	P80025	560	570	yes	no	2;3	0.00077629	123.01	matching	matching	matching	matching	matching	matching	MS/MS	matching
DHTVTLSPSLFNPEEFMPLDPTQEPIFPPELLR	NCCMNQKKDHTVTLSP	IFPPELLRLKDVPPKQ	K	D	H	L	R	L	0	1	1	2	0	1	4	0	1	1	5	0	1	3	7	2	3	0	0	1	0	33	0	3805.89	P80457;F1MUT3	P80457	186	218	yes	no	3;4	7.3311e-17	87.772	matching	MS/MS	matching	matching	matching	matching	MS/MS	MS/MS
DIASDTSGDYEK	ELKRDLAKDIASDTSG	DTSGDYEKALLSLAKG	K	D	I	E	K	A	1	0	0	3	0	0	1	1	0	1	0	1	0	0	0	2	1	0	1	0	0	12	0	1299.55	P46193;F1N650	P46193	167	178	yes	no	2	0.005739	112.84	matching	matching	matching	matching	matching	MS/MS	matching	matching
DIEALFVSESK	MQELLPAKDIEALFVS	ALFVSESKKTLTRKAV	K	D	I	S	K	K	1	0	0	1	0	0	2	0	0	1	1	1	0	1	0	2	0	0	0	1	0	11	0	1236.62	CON__Q3KUS7;P81187	CON__Q3KUS7	626	636	yes	no	2	5.3933e-107	187.31	matching	MS/MS	MS/MS	MS/MS	MS/MS	matching	MS/MS	MS/MS
DIEALFVSESKK	MQELLPAKDIEALFVS	LFVSESKKTLTRKAVY	K	D	I	K	K	T	1	0	0	1	0	0	2	0	0	1	1	2	0	1	0	2	0	0	0	1	0	12	1	1364.72	CON__Q3KUS7;P81187	CON__Q3KUS7	626	637	yes	no	2	0.0065476	110.98	matching	matching	matching	matching	matching	MS/MS	matching	matching
DIENQYETQITQIEHEVSSSGQEVQSSAK	QLIAKNRKDIENQYET	QEVQSSAKEVTQLRHG	K	D	I	A	K	E	1	0	1	1	0	5	5	1	1	3	0	1	0	0	0	5	2	0	1	2	0	29	0	3263.51	CON__P35527	CON__P35527	340	368	yes	yes	3	9.9653e-29	98.015	matching	matching	matching	matching	matching	matching	MS/MS	matching
DIEVIMGGGR	YQLMHNIKDIEVIMGG	EVIMGGGRKYMFPKNR	K	D	I	G	R	K	0	1	0	1	0	0	1	3	0	2	0	0	1	0	0	0	0	0	0	1	0	10	0	1045.52	P09487	P09487	214	223	yes	yes	2	0.020454	96.143	matching	matching	matching	matching	matching	matching	matching	matching
DIFTGLIGPMK	YSAVDPTKDIFTGLIG	TGLIGPMKICRNGTLL	K	D	I	M	K	I	0	0	0	1	0	0	0	2	0	2	1	1	1	1	1	0	1	0	0	0	0	11	0	1190.64	F1N076;CON__ENSEMBL:ENSBTAP00000031900	F1N076	543	553	no	no	2	7.2385e-25	173.64	matching	MS/MS	MS/MS	MS/MS	MS/MS	MS/MS	matching	MS/MS
DIGSESTEDQAMEDIK	EKVNELSKDIGSESTE	DQAMEDIKQMEAESIS	K	D	I	I	K	Q	1	0	0	3	0	1	3	1	0	2	0	1	1	0	0	2	1	0	0	0	0	16	0	1766.75	CON__P02662;P02662	CON__P02662	43	58	yes	no	2;3	0	325.77	MS/MS	MS/MS	MS/MS	MS/MS	MS/MS	MS/MS	MS/MS	MS/MS
DIGSESTEDQAMEDIKQMEAESISSSEEIVPNSVEQK	EKVNELSKDIGSESTE	VPNSVEQKHIQKEDVP	K	D	I	Q	K	H	2	0	1	3	0	3	8	1	0	4	0	2	2	0	1	7	1	0	0	2	0	37	1	4068.82	CON__P02662;P02662	CON__P02662	43	79	yes	no	3;4	2.7492e-07	56.648	matching	matching	matching	MS/MS	MS/MS	MS/MS	matching	matching
DILAVEDMRNR	LVDEMEEKDILAVEDM	AVEDMRNRWCSYLGQE	K	D	I	N	R	W	1	2	1	2	0	0	1	0	0	1	1	0	1	0	0	0	0	0	0	1	0	11	1	1330.67	F1MP13	F1MP13	975	985	yes	yes	2	0.042454	71.03	matching	matching	matching	matching	matching	matching	matching	matching
DILSQLEIK	IATDYKLKDILSQLEI	ILSQLEIKKVFTQEAD	K	D	I	I	K	K	0	0	0	1	0	1	1	0	0	2	2	1	0	0	0	1	0	0	0	0	0	9	0	1057.6	A6QPQ2;A0A0A0MP89	A6QPQ2	323	331	yes	no	2	1.4793e-18	148.91	matching	matching	matching	matching	matching	matching	matching	matching
DILSQLGIK	ISSDYQLRDILSQLGI	ILSQLGIKKIFTSDAD	R	D	I	I	K	K	0	0	0	1	0	1	0	1	0	2	2	1	0	0	0	1	0	0	0	0	0	9	0	985.581	A0A0A0MPA0;CON__REFSEQ:XP_001252647;A0A0A0MP92;CON__A2I7N3;A2I7N3	A0A0A0MPA0	322	330	no	no	2	2.2483e-186	204.79	MS/MS	MS/MS	MS/MS	MS/MS	MS/MS	MS/MS	MS/MS	MS/MS
DILSQLGIKK	ISSDYQLRDILSQLGI	LSQLGIKKIFTSDADF	R	D	I	K	K	I	0	0	0	1	0	1	0	1	0	2	2	2	0	0	0	1	0	0	0	0	0	10	1	1113.68	A0A0A0MPA0;CON__REFSEQ:XP_001252647;A0A0A0MP92;CON__A2I7N3;A2I7N3	A0A0A0MPA0	322	331	no	no	2	0.00094622	123.11	matching	matching	matching	matching	matching	MS/MS	matching	matching
DILTSNNIEVEK	PETVTYLKDILTSNNI	SNNIEVEKMTITDQVN	K	D	I	E	K	M	0	0	2	1	0	0	2	0	0	2	1	1	0	0	0	1	1	0	0	1	0	12	0	1373.7	Q32KY0;F1MS32	Q32KY0	165	176	yes	no	2	4.2311e-05	126.32	matching	matching	matching	MS/MS	MS/MS	matching	matching	matching
DINAYNGEEPTEK	EDHLAWSKDINAYNGE	NGEEPTEKLPFPIIDD	K	D	I	E	K	L	1	0	2	1	0	0	3	1	0	1	0	1	0	0	1	0	1	0	1	0	0	13	0	1478.65	O77834	O77834	85	97	yes	yes	2	2.7074e-12	139.77	matching	matching	matching	matching	matching	matching	matching	matching
DIPTTCQVSCLEVLR	GIFKVLLKDIPTTCQV	VSCLEVLRILSRDKKV	K	D	I	L	R	I	0	1	0	1	2	1	1	0	0	1	2	0	0	0	1	1	2	0	0	2	0	15	0	1789.87	E1BD35	E1BD35	57	71	yes	yes	4	0.042948	30.874	matching	matching	matching	matching	MS/MS	matching	matching	matching
DIQYLPLIK	AINLLPSRDIQYLPLI	IQYLPLIKMSTITGPV	R	D	I	I	K	M	0	0	0	1	0	1	0	0	0	2	2	1	0	0	1	0	0	0	1	0	0	9	0	1101.64	P02672;CON__P02672;A5PJE3	P02672	220	228	yes	no	2	5.4179e-11	159.79	matching	MS/MS	matching	matching	matching	MS/MS	MS/MS	MS/MS
DISYLYR	NTSIEAHKDISYLYRF	KDISYLYRFNWDHCGK	K	D	I	Y	R	F	0	1	0	1	0	0	0	0	0	1	1	0	0	0	0	1	0	0	2	0	0	7	0	928.465	P02702	P02702	76	82	yes	yes	2	1.4975e-06	115.46	MS/MS	matching	MS/MS	matching	matching	MS/MS	MS/MS	MS/MS
DITPTLR	HSSDKKAKDITPTLRL	KDITPTLRLYVGKNQL	K	D	I	L	R	L	0	1	0	1	0	0	0	0	0	1	1	0	0	0	1	0	2	0	0	0	0	7	0	814.455	Q2TBU0;G3X6K8	Q2TBU0	211	217	yes	no	1	0.015711	77.374	matching	matching	matching	matching	matching	matching	matching	matching
DITYFIQQLLR	KHIPIAGRDITYFIQQ	YFIQQLLRDREVGIPP	R	D	I	L	R	D	0	1	0	1	0	2	0	0	0	2	2	0	0	1	0	0	1	0	1	0	0	11	0	1408.77	F1N049;P61157;F1N6J8	F1N049	165	175	yes	no	2	8.382e-90	178.46	matching	matching	matching	matching	matching	matching	matching	matching
DIVDIPQLFR	RELGLTERDIVDIPQL	VDIPQLFRLIKDSRGT	R	D	I	F	R	L	0	1	0	2	0	1	0	0	0	2	1	0	0	1	1	0	0	0	0	1	0	10	0	1214.67	E1BCN3	E1BCN3	562	571	yes	yes	2	0.015702	90.05	matching	matching	matching	matching	matching	matching	matching	matching
DKDDQEWESPSPPKPTVFISGVIAR	SGDTREEKDKDDQEWE	FISGVIARGDKDFPPA	K	D	K	A	R	G	1	1	0	3	0	1	2	1	0	2	0	2	0	1	4	3	1	1	0	2	0	25	2	2797.39	Q5EAE6	Q5EAE6	41	65	yes	yes	3	0.00029555	72.676	matching	matching	matching	matching	matching	matching	matching	matching
DKPDNFQLFQSPHGK	HAQEHFGKDKPDNFQL	LFQSPHGKDLLFKDSA	K	D	K	G	K	D	0	0	1	2	0	2	0	1	1	0	1	2	0	2	2	1	0	0	0	0	0	15	1	1756.85	G3X6N3;CON__Q0IIK2;CON__Q29443;Q29443	G3X6N3	300	314	yes	no	2;3;4	0	244	matching	MS/MS	MS/MS	MS/MS	MS/MS	MS/MS	matching	matching
DLADEVALVDVMEDK	CAISILMKDLADEVAL	LVDVMEDKLKGEMMDL	K	D	L	D	K	L	2	0	0	4	0	0	2	0	0	0	2	1	1	0	0	0	0	0	0	3	0	15	0	1660.79	P19858	P19858	43	57	yes	yes	2	1.3105e-08	137.21	matching	matching	matching	matching	matching	matching	matching	matching
DLAQYDAAHHEEFK	LLIQTATRDLAQYDAA	AAHHEEFKRYEMLKEH	R	D	L	F	K	R	3	0	0	2	0	1	2	0	2	0	1	1	0	1	0	0	0	0	1	0	0	14	0	1672.75	Q0P569	Q0P569	161	174	yes	yes	2;3	3.9621e-05	140.03	MS/MS	matching	matching	matching	matching	matching	matching	MS/MS
DLAQYDAAHHEEFKR	LLIQTATRDLAQYDAA	AHHEEFKRYEMLKEHE	R	D	L	K	R	Y	3	1	0	2	0	1	2	0	2	0	1	1	0	1	0	0	0	0	1	0	0	15	1	1828.85	Q0P569	Q0P569	161	175	yes	yes	2;3;4	0.00051853	101.43	matching	matching	matching	matching	matching	matching	MS/MS	MS/MS
DLEEPINFR	WYWTRQDRDLEEPINF	LEEPINFRLPENRISK	R	D	L	F	R	L	0	1	1	1	0	0	2	0	0	1	1	0	0	1	1	0	0	0	0	0	0	9	0	1131.56	Q0VC51;E1BFL8	Q0VC51	78	86	yes	no	2	0.0019061	109.66	matching	matching	matching	matching	MS/MS	MS/MS	matching	matching
DLELLIQTATR	NQHTFEARDLELLIQT	LLIQTATRDLAQYDAA	R	D	L	T	R	D	1	1	0	1	0	1	1	0	0	1	3	0	0	0	0	0	2	0	0	0	0	11	0	1271.71	Q0P569	Q0P569	150	160	yes	yes	2	1.0071e-194	223.08	MS/MS	matching	matching	MS/MS	MS/MS	MS/MS	MS/MS	MS/MS
DLEVIAATPTSLLISWDAPAVTVR	STVSDVPRDLEVIAAT	DAPAVTVRYYRITYGE	R	D	L	V	R	Y	4	1	0	2	0	0	1	0	0	2	3	0	0	0	2	2	3	1	0	3	0	24	0	2537.37	B8Y9S9;P07589;G5E5A9;B8Y9T0	B8Y9S9	1454	1477	yes	no	2;3	7.6e-08	92.39	matching	matching	matching	matching	matching	matching	matching	matching
DLGATWVVLGHSER	EISPGMIKDLGATWVV	VVLGHSERRHVFGESD	K	D	L	E	R	R	1	1	0	1	0	0	1	2	1	0	2	0	0	0	0	1	1	1	0	2	0	14	0	1538.78	Q5E956	Q5E956	86	99	yes	yes	2;3	0.00013504	127.3	matching	matching	matching	matching	matching	matching	matching	matching
DLGEEHFK	SEIAHRFKDLGEEHFK	DLGEEHFKGLVLIAFS	K	D	L	F	K	G	0	0	0	1	0	0	2	1	1	0	1	1	0	1	0	0	0	0	0	0	0	8	0	973.451	P02769;CON__P02769	P02769	37	44	yes	no	2	0.0036251	104.44	matching	matching	matching	matching	MS/MS	matching	matching	matching
DLGEELEALKTELEDTLDSTAAQQELR	NKAEKQKRDLGEELEA	TAAQQELRSKREQEVN	R	D	L	L	R	S	3	1	0	3	0	2	6	1	0	0	6	1	0	0	0	1	3	0	0	0	0	27	1	3016.47	F1MQ37	F1MQ37	1136	1162	yes	yes	3	0.00031686	61.417	matching	matching	matching	matching	matching	matching	matching	matching
DLGEENFK	SEVAHRFKDLGEENFK	DLGEENFKALVLIAFA	K	D	L	F	K	A	0	0	1	1	0	0	2	1	0	0	1	1	0	1	0	0	0	0	0	0	0	8	0	950.435	CON__P02768-1	CON__P02768-1	37	44	yes	yes	2	0.015081	88.177	matching	matching	matching	MS/MS	matching	matching	matching	matching
DLKTENLLLDDNMDIK	HSHNIVHRDLKTENLL	LDDNMDIKLADFGFGN	R	D	L	I	K	L	0	0	2	4	0	0	1	0	0	1	4	2	1	0	0	0	1	0	0	0	0	16	1	1888.95	E1BNS8	E1BNS8	149	164	yes	yes	3	0.0024673	95.981	matching	matching	matching	matching	matching	matching	MS/MS	MS/MS
DLLASVTAPQK	PDIHGTYKDLLASVTA	ASVTAPQKNLKSASRI	K	D	L	Q	K	N	2	0	0	1	0	1	0	0	0	0	2	1	0	0	1	1	1	0	0	1	0	11	0	1141.63	Q95121;CON__Q95121	Q95121	122	132	yes	no	2	0.02894	72.731	matching	matching	matching	matching	matching	matching	matching	matching
DLLFKDSADGFLK	LFQSPHGKDLLFKDSA	DSADGFLKIPSKMDFE	K	D	L	L	K	I	1	0	0	3	0	0	0	1	0	0	3	2	0	2	0	1	0	0	0	0	0	13	1	1467.76	G3X6N3;CON__Q0IIK2;CON__Q29443;Q29443	G3X6N3	315	327	yes	no	2	0.00013018	110.92	matching	matching	matching	matching	matching	matching	matching	matching
DLLFKDSALGFLR	FGSPPGQRDLLFKDSA	DSALGFLRIPSKVDSA	R	D	L	L	R	I	1	1	0	2	0	0	0	1	0	0	4	1	0	2	0	1	0	0	0	0	0	13	1	1493.82	P24627	P24627	316	328	yes	yes	2;3	2.9574e-36	157.09	matching	matching	matching	matching	matching	MS/MS	matching	matching
DLLFTDAAIGFLR	LFYSPHGKDLLFTDAA	DAAIGFLRVPPKMDAK	K	D	L	L	R	V	2	1	0	2	0	0	0	1	0	1	3	0	0	2	0	0	1	0	0	0	0	13	0	1450.78	E1BI82	E1BI82	311	323	yes	yes	2	5.9283e-133	188.15	matching	matching	matching	matching	matching	matching	matching	matching
DLLFTDSAIGFLR	LFYSPHGKDLLFTDSA	DSAIGFLRVPPKMDAK	K	D	L	L	R	V	1	1	0	2	0	0	0	1	0	1	3	0	0	2	0	1	1	0	0	0	0	13	0	1466.78	CON__Q2HJF0	CON__Q2HJF0	311	323	yes	yes	2	0.002586	96.464	matching	matching	matching	matching	matching	matching	matching	matching
DLLLDPAWEK	AQEDDWDRDLLLDPAW	LLDPAWEKQQRKTFTA	R	D	L	E	K	Q	1	0	0	2	0	0	1	0	0	0	3	1	0	0	1	0	0	1	0	0	0	10	0	1198.62	Q3B7N2;Q3ZC55;Q0III9;G3X7I1;A5D7D1	A5D7D1	41	50	no	no	2	0.013074	93.561	matching	matching	matching	matching	matching	MS/MS	matching	matching
DLQFVEVTDVK	SDKVPPPRDLQFVEVT	FVEVTDVKITIMWTPP	R	D	L	V	K	I	0	0	0	2	0	1	1	0	0	0	1	1	0	1	0	0	1	0	0	3	0	11	0	1291.67	B8Y9S9;P07589;G5E5A9;B8Y9T0	B8Y9S9	913	923	yes	no	2	0.00019491	127.02	matching	matching	matching	matching	matching	MS/MS	matching	matching
DLQLSDVFLK	LNFTMKTKDLQLSDVF	QLSDVFLKALNHLPLE	K	D	L	L	K	A	0	0	0	2	0	1	0	0	0	0	3	1	0	1	0	1	0	0	0	1	0	10	0	1176.64	Q29RU4;F1MM86	Q29RU4	331	340	yes	no	2	0.00012938	126.66	matching	MS/MS	matching	matching	matching	matching	matching	matching
DLQLVLPDYFPER	RYILDYLRDLQLVLPD	LPDYFPERSRLQREAE	R	D	L	E	R	S	0	1	0	2	0	1	1	0	0	0	3	0	0	1	2	0	0	0	1	1	0	13	0	1603.82	G3N3D4	G3N3D4	97	109	yes	yes	2	0.013592	83.877	matching	matching	matching	matching	matching	matching	matching	matching
DLSAGAVSAVR	DASIMNGKDLSAGAVS	AGAVSAVRCIANPIKL	K	D	L	V	R	C	3	1	0	1	0	0	0	1	0	0	1	0	0	0	0	2	0	0	0	2	0	11	0	1044.56	Q32LE5	Q32LE5	86	96	yes	yes	2	2.6198e-16	144.1	matching	matching	matching	matching	matching	matching	matching	matching
DLSHSIMER	YSNAGNSRDLSHSIME	LSHSIMERALFHMDNC	R	D	L	E	R	A	0	1	0	1	0	0	1	0	1	1	1	0	1	0	0	2	0	0	0	0	0	9	0	1086.51	P80457;F1MUT3	P80457	872	880	yes	no	2	7.8064e-08	152.11	matching	matching	matching	matching	matching	matching	matching	matching
DLSMVILLPDDIQDEATGLK	LELPYEGKDLSMVILL	QDEATGLKKIEQQLTL	K	D	L	L	K	K	1	0	0	4	0	1	1	1	0	2	4	1	1	0	1	1	1	0	0	1	0	20	0	2185.12	Q1JPB0;G1K1L8	Q1JPB0	224	243	yes	no	2;3	2.0906e-05	120.82	matching	matching	matching	matching	matching	MS/MS	matching	matching
DLSMVILLPDDIQDEATGLKK	LELPYEGKDLSMVILL	DEATGLKKIEQQLTLE	K	D	L	K	K	I	1	0	0	4	0	1	1	1	0	2	4	2	1	0	1	1	1	0	0	1	0	21	1	2313.21	Q1JPB0;G1K1L8	Q1JPB0	224	244	yes	no	2;3	2.5252e-45	151.58	matching	matching	matching	matching	matching	MS/MS	matching	matching
DLTDYLMK	LRLDLAGRDLTDYLMK	DLTDYLMKILTERGYS	R	D	L	M	K	I	0	0	0	2	0	0	0	0	0	0	2	1	1	0	0	0	1	0	1	0	0	8	0	997.479	P63258;P60712;F1MRD0;Q5E9B5;F1MKC4;Q3ZC07;P68138;P62739;G8JKX4	P63258	184	191	no	no	1;2	3.5478e-34	163.9	matching	MS/MS	matching	MS/MS	MS/MS	MS/MS	matching	MS/MS
DLVTEEAFLGITDQETEGK	AEENRALKDLVTEEAF	TDQETEGKFVDLTGKG	K	D	L	G	K	F	1	0	0	2	0	1	4	2	0	1	2	1	0	1	0	0	3	0	0	1	0	19	0	2094	O02659	O02659	177	195	yes	yes	2	0.013723	68.168	matching	matching	matching	matching	matching	matching	matching	matching
DLYANTVLSGGTTMYPGIADR	KCDVDIRKDLYANTVL	MYPGIADRMQKEITAL	K	D	L	D	R	M	2	1	1	2	0	0	0	3	0	1	2	0	1	0	1	1	3	0	2	1	0	21	0	2214.06	P63258;P60712	P63258	292	312	yes	no	2;3	0	245.12	matching	MS/MS	MS/MS	MS/MS	MS/MS	MS/MS	matching	MS/MS
DMANRIGAFGYMECSAKTK	PVKPEEGRDMANRIGA	MECSAKTKDGVREVFE	R	D	M	T	K	D	3	1	1	1	1	0	1	2	0	1	0	2	2	1	0	1	1	0	1	0	0	19	2	2148.98	P61585	P61585	146	164	yes	yes	2	0.03466	50.392	matching	matching	matching	matching	matching	matching	matching	matching
DMDDFEEDAEPR	HQEVFLGKDMDDFEED	FEEDAEPRKSRRKLMV	K	D	M	P	R	K	1	1	0	4	0	0	3	0	0	0	0	0	1	1	1	0	0	0	0	0	0	12	0	1467.55	Q3ZBZ1	Q3ZBZ1	79	90	yes	yes	2	7.6443e-15	162.93	MS/MS	matching	matching	matching	matching	matching	MS/MS	MS/MS
DMEEWINVIK	TLAAPNRKDMEEWINV	EEWINVIKTVQQGEIR	K	D	M	I	K	T	0	0	1	1	0	0	2	0	0	2	0	1	1	0	0	0	0	1	0	1	0	10	0	1275.62	F1MCG9	F1MCG9	305	314	yes	yes	3	0.0054873	101.54	matching	matching	matching	MS/MS	MS/MS	matching	matching	matching
DMKMPREAAAQVEK	QESQEKVRDMKMPREA	EAAAQVEKSEAEIQQG	R	D	M	E	K	S	3	1	0	1	0	1	2	0	0	0	0	2	2	0	1	0	0	0	0	1	0	14	2	1602.79	F1N530	F1N530	355	368	yes	yes	2	0.0042818	94.122	matching	matching	matching	matching	matching	matching	matching	matching
DMPIQAFLLYQEPVLGPVR	KAVPYPQRDMPIQAFL	EPVLGPVRGPFPIIV_	R	D	M	V	R	G	1	1	0	1	0	2	1	1	0	1	3	0	1	1	3	0	0	0	1	2	0	19	0	2185.16	CON__P02666;P02666	CON__P02666	184	202	yes	no	2;3	3.464e-173	190.37	MS/MS	MS/MS	MS/MS	MS/MS	MS/MS	MS/MS	MS/MS	MS/MS
DMSGSPASGIPVK	FLLQALVRDMSGSPAS	PASGIPVKVSAKLFSG	R	D	M	V	K	V	1	0	0	1	0	0	0	2	0	1	0	1	1	0	2	3	0	0	0	1	0	13	0	1244.61	CON__ENSEMBL:ENSBTAP00000007350;F1MVK1	CON__ENSEMBL:ENSBTAP00000007350	392	404	no	no	2	1.3104e-07	134.18	matching	matching	matching	matching	MS/MS	MS/MS	matching	matching
DMYSFLQDMGLK	PVSNTNEKDMYSFLQD	FLQDMGLKAFTNSKIH	K	D	M	L	K	A	0	0	0	2	0	1	0	1	0	0	2	1	2	1	0	1	0	0	1	0	0	12	0	1446.65	Q7SIH1;CON__ENSEMBL:ENSBTAP00000024146	Q7SIH1	667	678	yes	no	2	3.7684e-268	236.08	matching	matching	matching	MS/MS	matching	MS/MS	matching	matching
DNENEITGIR	GSYFSTTKDNENEITG	ENEITGIRVFIGIGGI	K	D	N	I	R	V	0	1	2	1	0	0	2	1	0	2	0	0	0	0	0	0	1	0	0	0	0	10	0	1159.55	F1N1Z8	F1N1Z8	62	71	yes	yes	1;2	1.4182e-103	194.48	matching	MS/MS	MS/MS	MS/MS	MS/MS	MS/MS	matching	MS/MS
DNGVFSVHITSLR	GRIVSVPKDNGVFSVH	SVHITSLRKEDAGRYV	K	D	N	L	R	K	0	1	1	1	0	0	0	1	1	1	1	0	0	1	0	2	1	0	0	2	0	13	0	1443.75	P81265;F6PQI6;F1MR22	P81265	303	315	yes	no	2;3	2.5553e-93	189.99	MS/MS	MS/MS	MS/MS	MS/MS	matching	MS/MS	MS/MS	MS/MS
DNLAEDIMR	KARVEVERDNLAEDIM	NLAEDIMRLREKLQEE	R	D	N	M	R	L	1	1	1	2	0	0	1	0	0	1	1	0	1	0	0	0	0	0	0	0	0	9	0	1075.5	P48616	P48616	176	184	yes	yes	2	4.3766e-70	174.86	matching	MS/MS	matching	matching	MS/MS	MS/MS	matching	matching
DNLDKPTQFSVLLGAWQLGNPGPR	LTAAHCFKDNLDKPTQ	QLGNPGPRSQEVGIAW	K	D	N	P	R	S	1	1	2	2	0	2	0	3	0	0	4	1	0	1	3	1	1	1	0	1	0	24	1	2622.36	E1BNJ9	E1BNJ9	94	117	yes	yes	3	5.7223e-15	110.38	matching	matching	matching	matching	matching	MS/MS	matching	matching
DNLTLWTSDQQDEEAGEGN	TLIMQLLRDNLTLWTS	DEEAGEGN________	R	D	N	G	N	-	1	0	2	3	0	2	3	2	0	0	2	0	0	0	0	1	2	1	0	0	0	19	0	2120.88	F1MPT3;P68509	F1MPT3	202	220	yes	no	3	0.041986	45.618	matching	matching	matching	matching	matching	matching	matching	matching
DNPQTHYYAVAVVK	VAEFHGTKDNPQTHYY	YYAVAVVKKDTDFKLN	K	D	N	V	K	K	2	0	1	1	0	1	0	0	1	0	0	1	0	0	1	0	1	0	2	3	0	14	0	1603.8	G3X6N3;CON__Q0IIK2;CON__Q29443;Q29443	G3X6N3	107	120	yes	no	2;3	3.9121e-116	194.55	matching	matching	matching	matching	matching	MS/MS	MS/MS	matching
DNPQTHYYAVAVVKK	VAEFHGTKDNPQTHYY	YAVAVVKKDTDFKLNE	K	D	N	K	K	D	2	0	1	1	0	1	0	0	1	0	0	2	0	0	1	0	1	0	2	3	0	15	1	1731.89	G3X6N3;CON__Q0IIK2;CON__Q29443;Q29443	G3X6N3	107	121	yes	no	3	0.0017714	101.2	matching	matching	matching	matching	matching	matching	matching	matching
DNVGWYQQVPGSGLR	GSSSNIGRDNVGWYQQ	QVPGSGLRTIIYSSSS	R	D	N	L	R	T	0	1	1	1	0	2	0	3	0	0	1	0	0	0	1	1	0	1	1	2	0	15	0	1674.81	CON__Q1RMN8	CON__Q1RMN8	51	65	yes	yes	2	1.0271e-86	181.51	matching	matching	matching	matching	matching	matching	matching	matching
DPDQTDGPGLSYLSSHIANVER	KQFFKNWRDPDQTDGP	SHIANVERVPFDAATL	R	D	P	E	R	V	1	1	1	3	0	1	1	2	1	1	2	0	0	0	2	3	1	0	1	1	0	22	0	2370.11	F1N1I6;CON__Q3SX14;Q3SX14;F1MJH1	F1N1I6	397	418	yes	no	3	2.0842e-42	151.58	matching	MS/MS	MS/MS	MS/MS	MS/MS	MS/MS	MS/MS	MS/MS
DPFNPFELTNHAVLLVGYGTDAASGLDYWIVK	VYHHTGLRDPFNPFEL	GLDYWIVKNSWGTSWG	R	D	P	V	K	N	3	0	2	3	0	0	1	3	1	1	4	1	0	2	2	1	2	1	2	3	0	32	0	3521.75	Q3ZCJ8;F1N455	Q3ZCJ8	395	426	yes	no	3;4	6.5156e-05	60.527	matching	matching	matching	matching	matching	MS/MS	matching	matching
DPLTITVR	SINTQNKRDPLTITVR	DPLTITVRTKKDNIPE	R	D	P	V	R	T	0	1	0	1	0	0	0	0	0	1	1	0	0	0	1	0	2	0	0	1	0	8	0	913.523	Q2UVX4;CON__Q2UVX4;G3X7A5	Q2UVX4	416	423	yes	no	2	1.6333e-44	176.44	matching	MS/MS	MS/MS	MS/MS	MS/MS	MS/MS	MS/MS	MS/MS
DPNHFRPAGLPDK	NEWGRSGKDPNHFRPA	RPAGLPDKY_______	K	D	P	D	K	Y	1	1	1	2	0	0	0	1	1	0	1	1	0	1	3	0	0	0	0	0	0	13	1	1462.73	Q8SQ28;P35541;E1BJF9	Q8SQ28	118	130	no	no	2;3	2.5196e-30	173.33	matching	matching	MS/MS	MS/MS	matching	matching	matching	MS/MS
DPNHFRPAGLPDKY	NEWGRSGKDPNHFRPA	PAGLPDKY________	K	D	P	K	Y	-	1	1	1	2	0	0	0	1	1	0	1	1	0	1	3	0	0	0	1	0	0	14	2	1625.8	Q8SQ28;P35541;E1BJF9	Q8SQ28	118	131	no	no	2;3	7.5558e-09	157.33	matching	matching	matching	matching	matching	matching	matching	matching
DPNHFRPAGLPNK	NEWGRSGKDPNHFRPA	RPAGLPNKY_______	K	D	P	N	K	Y	1	1	2	1	0	0	0	1	1	0	1	1	0	1	3	0	0	0	0	0	0	13	1	1461.75	F1MMW8	F1MMW8	118	130	yes	yes	2;3	1.0841e-07	149.49	matching	MS/MS	MS/MS	matching	matching	MS/MS	matching	MS/MS
DPNHFRPAGLPNKY	NEWGRSGKDPNHFRPA	PAGLPNKY________	K	D	P	K	Y	-	1	1	2	1	0	0	0	1	1	0	1	1	0	1	3	0	0	0	1	0	0	14	2	1624.81	F1MMW8	F1MMW8	118	131	yes	yes	2;3	4.1274e-13	143.55	matching	matching	MS/MS	MS/MS	MS/MS	MS/MS	matching	matching
DPPANIQLFQEVPNGQSK	SATLLFQKDPPANIQL	EVPNGQSKEDTVGRPL	K	D	P	S	K	E	1	0	2	1	0	3	1	1	0	1	1	1	0	1	3	1	0	0	0	1	0	18	0	1980.99	P80457;F1MUT3	P80457	552	569	yes	no	2;3	6.3736e-252	204.71	MS/MS	matching	matching	matching	matching	matching	MS/MS	MS/MS
DPSGFSPEVQK	SYSFVFARDPSGFSPE	GFSPEVQKIVRQRQEE	R	D	P	Q	K	I	0	0	0	1	0	1	1	1	0	0	0	1	0	1	2	2	0	0	0	1	0	11	0	1189.56	P18902;G1K122	P18902	140	150	yes	no	2	5.5106e-31	173.64	matching	matching	MS/MS	matching	MS/MS	matching	matching	matching
DPVASTSNLDMEFR	GIDYSLLKDPVASTSN	SNLDMEFRGAFYPLTE	K	D	P	F	R	G	1	1	1	2	0	0	1	0	0	0	1	0	1	1	1	2	1	0	0	1	0	14	0	1580.71	Q58DL9	Q58DL9	236	249	yes	yes	2	1.2019e-14	93.237	matching	matching	matching	matching	matching	matching	matching	matching
DPVQEAWAEDVDLR	GIFPVVCKDPVQEAWA	WAEDVDLRVNLAMNVG	K	D	P	L	R	V	2	1	0	3	0	1	2	0	0	0	1	0	0	0	1	0	0	1	0	2	0	14	0	1641.76	A5D984	A5D984	476	489	yes	yes	2	1.0699e-05	116.78	matching	matching	matching	matching	matching	matching	matching	matching
DPYKLRPVAAEIYGTK	GMVFEAGRDPYKLRPV	AAEIYGTKESPQTHYY	R	D	P	T	K	E	2	1	0	1	0	0	1	1	0	1	1	2	0	0	2	0	1	0	2	1	0	16	2	1819.98	P24627	P24627	89	104	yes	yes	3	0.022933	89.992	matching	matching	matching	matching	matching	matching	matching	matching
DQFPEVYVPTVFENYVADIEVDGK	CLLIVFSKDQFPEVYV	ADIEVDGKQVELALWD	K	D	Q	G	K	Q	1	0	1	3	0	1	3	1	0	1	0	1	0	2	2	0	1	0	2	5	0	24	0	2772.32	P61585	P61585	28	51	yes	yes	2;3	1.3274e-19	120.63	matching	matching	matching	matching	matching	MS/MS	matching	MS/MS
DQGTYEDYVEGLR	LQTVAKNKDQGTYEDY	EDYVEGLRVFDKEGNG	K	D	Q	L	R	V	0	1	0	2	0	1	2	2	0	0	1	0	0	0	0	0	1	0	2	1	0	13	0	1543.68	P60661	P60661	82	94	yes	yes	2	4.0446e-05	149.32	matching	matching	matching	matching	matching	matching	matching	matching
DQLIQNLLK	________________	QLIQNLLKEEHVPQNK	K	D	Q	L	K	E	0	0	1	1	0	2	0	0	0	1	3	1	0	0	0	0	0	0	0	0	0	9	0	1083.63	P19858	P19858	6	14	yes	yes	2	1.237e-12	142.98	matching	matching	matching	matching	matching	matching	matching	matching
DQPPNSVEGLLNALR	KGCIKVLKDQPPNSVE	EGLLNALRYTTKHLND	K	D	Q	L	R	Y	1	1	2	1	0	1	1	1	0	0	3	0	0	0	2	1	0	0	0	1	0	15	0	1621.84	Q2KJI3	Q2KJI3	290	304	yes	yes	2	0.00048266	101.01	matching	matching	matching	matching	matching	matching	matching	matching
DQPTIDKIFQDLDADKDGAVSFEEFVVLVSR	PKTLQNTKDQPTIDKI	EFVVLVSRVLKTAHID	K	D	Q	S	R	V	2	1	0	6	0	2	2	1	0	2	2	2	0	3	1	2	1	0	0	4	0	31	2	3495.74	P79105;G3N2H5	P79105	50	80	yes	no	3;4	0.0011916	53.469	matching	matching	matching	matching	matching	matching	matching	matching
DQTVIQNTDGNNNEAWAK	KGDVAFVKDQTVIQNT	NNNEAWAKNLKKENFE	K	D	Q	A	K	N	2	0	4	2	0	2	1	1	0	1	0	1	0	0	0	0	2	1	0	1	0	18	0	2016.91	G3X6N3;CON__Q0IIK2;CON__Q29443;Q29443	G3X6N3	561	578	yes	no	2;3	0	364.14	matching	matching	MS/MS	MS/MS	matching	MS/MS	MS/MS	MS/MS
DQTVIQNTDGNNNEAWAKNLKK	KGDVAFVKDQTVIQNT	AWAKNLKKENFEVLCK	K	D	Q	K	K	E	2	0	5	2	0	2	1	1	0	1	1	3	0	0	0	0	2	1	0	1	0	22	2	2500.23	G3X6N3;CON__Q0IIK2;CON__Q29443;Q29443	G3X6N3	561	582	yes	no	3	6.422e-05	97.095	matching	MS/MS	matching	MS/MS	matching	matching	matching	matching
DQVANSAFVER	YYITGETKDQVANSAF	ANSAFVERLRKHGLEV	K	D	Q	E	R	L	2	1	1	1	0	1	1	0	0	0	0	0	0	1	0	1	0	0	0	2	0	11	0	1234.59	Q76LV2	Q76LV2	501	511	yes	yes	2	1.6304e-59	166.24	matching	matching	matching	matching	matching	MS/MS	matching	matching
DQYVSPETVTVR	NGKLSVEKDQYVSPET	SPETVTVRCDPGYRMV	K	D	Q	V	R	C	0	1	0	1	0	1	1	0	0	0	0	0	0	0	1	1	2	0	1	3	0	12	0	1392.69	G3N0S9;CON__ENSEMBL:ENSBTAP00000034412	G3N0S9	103	114	yes	no	2	2.627e-07	137.09	matching	MS/MS	MS/MS	MS/MS	matching	MS/MS	matching	matching
DSALGFLR	GQRDLLFKDSALGFLR	DSALGFLRIPSKVDSA	K	D	S	L	R	I	1	1	0	1	0	0	0	1	0	0	2	0	0	1	0	1	0	0	0	0	0	8	0	877.466	P24627	P24627	321	328	yes	yes	2	6.867e-34	155	MS/MS	MS/MS	MS/MS	MS/MS	MS/MS	MS/MS	MS/MS	MS/MS
DSAMLEYLK	AEHRGMLKDSAMLEYL	SAMLEYLKIAQDLEMY	K	D	S	L	K	I	1	0	0	1	0	0	1	0	0	0	2	1	1	0	0	1	0	0	1	0	0	9	0	1068.52	P31976	P31976	185	193	yes	yes	2	2.333e-17	147.2	matching	matching	matching	matching	matching	matching	matching	matching
DSAPAELVLSDGTLPAPELSAEPAILSPTPGALVQLR	SELAAWSRDSAPAELV	PGALVQLRCRAPRAGV	R	D	S	L	R	C	6	1	0	2	0	1	3	2	0	1	7	0	0	0	6	4	2	0	0	2	0	37	0	3694.97	Q2KJF1;CON__Q2KJF1	Q2KJF1	296	332	yes	no	4	4.6017e-24	79.054	matching	matching	matching	MS/MS	MS/MS	matching	matching	matching
DSAPNTLSDLTTQALR	LFGRLYEKDSAPNTLS	DLTTQALRLNPKTDAW	K	D	S	L	R	L	2	1	1	2	0	1	0	0	0	0	3	0	0	0	1	2	3	0	0	0	0	16	0	1701.85	Q58CQ9	Q58CQ9	484	499	yes	yes	2	0.0090234	76.341	matching	matching	matching	matching	matching	matching	matching	matching
DSITTWEILAVSLSDK	KLMNVFLKDSITTWEI	LAVSLSDKKGICVADP	K	D	S	D	K	K	1	0	0	2	0	0	1	0	0	2	2	1	0	0	0	3	2	1	0	1	0	16	0	1776.91	Q2UVX4;CON__Q2UVX4;G3X7A5	Q2UVX4	796	811	yes	no	2	0	271.43	matching	MS/MS	MS/MS	MS/MS	MS/MS	MS/MS	MS/MS	MS/MS
DSITTWEILAVSLSDKK	KLMNVFLKDSITTWEI	AVSLSDKKGICVADPY	K	D	S	K	K	G	1	0	0	2	0	0	1	0	0	2	2	2	0	0	0	3	2	1	0	1	0	17	1	1905.01	Q2UVX4;CON__Q2UVX4;G3X7A5	Q2UVX4	796	812	yes	no	2;3	2.4095e-135	158.14	matching	MS/MS	MS/MS	MS/MS	matching	MS/MS	MS/MS	MS/MS
DSLDSSTALVLVNAVYFK	KIKDLLPKDSLDSSTA	LVNAVYFKGQWNQKFK	K	D	S	F	K	G	2	0	1	2	0	0	0	0	0	0	3	1	0	1	0	3	1	0	1	3	0	18	0	1941.01	E1B8B5	E1B8B5	114	131	yes	yes	2;3	0	222.64	matching	matching	matching	matching	MS/MS	MS/MS	matching	matching
DSLDSSTVLVLVNAVYFK	KIKDLFPKDSLDSSTV	LVNAVYFKGQWNQKFK	K	D	S	F	K	G	1	0	1	2	0	0	0	0	0	0	3	1	0	1	0	3	1	0	1	4	0	18	0	1969.04	G3X894;G5E537	G5E537	21	38	no	no	2;3	3.2245e-49	158.17	matching	matching	matching	MS/MS	MS/MS	MS/MS	matching	matching
DSLFNYQK	TSRINKLRDSLFNYQK	DSLFNYQKNSKDSNTL	R	D	S	Q	K	N	0	0	1	1	0	1	0	0	0	0	1	1	0	1	0	1	0	0	1	0	0	8	0	1013.48	P02672;CON__P02672;A5PJE3	P02672	93	100	yes	no	2	3.0127e-117	203.93	matching	MS/MS	matching	matching	MS/MS	MS/MS	matching	matching
DSLLQDGEFTMDLR	GQKCSVIRDSLLQDGE	GEFTMDLRTKSTGGAP	R	D	S	L	R	T	0	1	0	3	0	1	1	1	0	0	3	0	1	1	0	1	1	0	0	0	0	14	0	1638.76	P02584;CON__P02584;E1BHJ0	P02584	76	89	yes	no	2;3	0	293.41	matching	matching	matching	matching	MS/MS	MS/MS	matching	matching
DSPSVWAAVPGK	DAAIVGYKDSPSVWAA	VWAAVPGKTFVNITPA	K	D	S	G	K	T	2	0	0	1	0	0	0	1	0	0	0	1	0	0	2	2	0	1	0	2	0	12	0	1212.61	P02584;CON__P02584;E1BHJ0	P02584	27	38	yes	no	2	1.0063e-75	172.17	matching	matching	matching	matching	matching	matching	matching	matching
DSQEEEKTEALTSAK	QVFVWVGKDSQEEEKT	TEALTSAKRYIETDPA	K	D	S	A	K	R	2	0	0	1	0	1	4	0	0	0	1	2	0	0	0	2	2	0	0	0	0	15	1	1664.77	F1N1I6;CON__Q3SX14;Q3SX14;F1MJH1	F1N1I6	713	727	yes	no	2;3	0	244	matching	MS/MS	MS/MS	MS/MS	MS/MS	MS/MS	matching	MS/MS
DSQPWEQALGR	TTQQPRGKDSQPWEQA	PWEQALGRFWDYLRWV	K	D	S	G	R	F	1	1	0	1	0	2	1	1	0	0	1	0	0	0	1	1	0	1	0	0	0	11	0	1285.61	Q03247;CON__Q03247	Q03247	39	49	yes	no	2	1.3851e-14	155.47	matching	matching	matching	matching	matching	matching	MS/MS	MS/MS
DSSTWLTAFVLK	SYGAWLHRDSSTWLTA	WLTAFVLKILSLAQDQ	R	D	S	L	K	I	1	0	0	1	0	0	0	0	0	0	2	1	0	1	0	2	2	1	0	1	0	12	0	1366.71	E1BH06;CON__P01030;P01030;CON__ENSEMBL:ENSBTAP00000007350	CON__ENSEMBL:ENSBTAP00000007350	1072	1083	no	no	2	0.00034188	145.14	matching	matching	matching	matching	matching	MS/MS	matching	matching
DSTISVEENGVSAESR	RNSCPNQRDSTISVEE	NGVSAESRFSVQMFKF	R	D	S	S	R	F	1	1	1	1	0	0	3	1	0	1	0	0	0	0	0	4	1	0	0	2	0	16	0	1678.76	F1N726	F1N726	424	439	yes	yes	2	0	262.73	matching	matching	matching	matching	MS/MS	MS/MS	matching	matching
DSTLIMQLLR	TLSEESYKDSTLIMQL	TLIMQLLRDNLTLWTS	K	D	S	L	R	D	0	1	0	1	0	1	0	0	0	1	3	0	1	0	0	1	1	0	0	0	0	10	0	1188.65	F1MPT3;P68509;Q0VC36;P63103;E1BDS9;P68252;A7Z057;P68250;P62261;Q3SZI4	P63103	213	222	no	no	2	1.0286e-226	201.61	matching	MS/MS	matching	matching	MS/MS	MS/MS	matching	matching
DSVASTITGVVDR	TTTVTGAKDSVASTIT	TITGVVDRTKGAVTGS	K	D	S	D	R	T	1	1	0	2	0	0	0	1	0	1	0	0	0	0	0	2	2	0	0	3	0	13	0	1318.67	Q9TUM6;F1N1N6;F1MQB0;F1MHI1	Q9TUM6	128	140	yes	no	2	0.01609	76.01	MS/MS	MS/MS	matching	matching	matching	matching	MS/MS	matching
DSWVDIFR	KHFALMQRDSWVDIFR	DSWVDIFRLLFWGGSY	R	D	S	F	R	L	0	1	0	2	0	0	0	0	0	1	0	0	0	1	0	1	0	1	0	1	0	8	0	1036.5	Q3ZBS7;CON__Q3ZBS7	Q3ZBS7	307	314	yes	no	2	7.2795e-05	112.41	matching	matching	matching	matching	matching	matching	matching	matching
DTANSILTYQVETGGIIRCNPAK	VAEGVMDRDTANSILT	IIRCNPAKRLTVDEAV	R	D	T	A	K	R	2	1	2	1	1	1	1	2	0	3	1	1	0	0	1	1	3	0	1	1	0	23	1	2520.26	F1MPT5	F1MPT5	1757	1779	yes	yes	4	0.011357	45.916	matching	matching	matching	matching	matching	matching	matching	matching
DTDAAVGDNIGYITFVLFPR	REPPLELKDTDAAVGD	ITFVLFPRHTNASARD	K	D	T	P	R	H	2	1	1	3	0	0	0	2	0	2	1	0	0	2	1	0	2	0	1	2	0	20	0	2183.09	Q3MHR7	Q3MHR7	211	230	yes	yes	2;3	2.4631e-13	130.77	matching	matching	matching	matching	matching	MS/MS	matching	matching
DTDIVDEAIYYFK	GPAPRETKDTDIVDEA	DEAIYYFKANVFFKNY	K	D	T	F	K	A	1	0	0	3	0	0	1	0	0	2	0	1	0	1	0	0	1	0	2	1	0	13	0	1590.75	Q3T035	Q3T035	38	50	yes	yes	2	1.0986e-69	189.24	matching	matching	matching	matching	matching	MS/MS	matching	matching
DTDTGALLFIGK	QPFIFVLRDTDTGALL	GALLFIGKILDPRGT_	R	D	T	G	K	I	1	0	0	2	0	0	0	2	0	1	2	1	0	1	0	0	2	0	0	0	0	12	0	1249.66	Q95121;CON__Q95121	Q95121	398	409	yes	no	2	9.4213e-197	206.36	matching	MS/MS	matching	matching	matching	matching	matching	matching
DTGLGLSPTASLR	AGALCLSRDTGLGLSP	LSPTASLRVFQPFFVE	R	D	T	L	R	V	1	1	0	1	0	0	0	2	0	0	3	0	0	0	1	2	2	0	0	0	0	13	0	1286.68	Q7SIH1;CON__ENSEMBL:ENSBTAP00000024146	Q7SIH1	777	789	yes	no	2	3.0118e-13	143.55	matching	matching	matching	matching	matching	matching	matching	matching
DTIIKPLLVEPEGLEK	VVPEHGRKDTIIKPLL	VEPEGLEKEVIFNSLL	K	D	T	E	K	E	0	0	0	1	0	0	3	1	0	2	3	2	0	0	2	0	1	0	0	1	0	16	1	1793.02	Q7SIH1;CON__ENSEMBL:ENSBTAP00000024146	Q7SIH1	898	913	yes	no	2;3	6.755e-25	141.85	matching	MS/MS	MS/MS	MS/MS	MS/MS	MS/MS	matching	matching
DTQSIIFLGK	FLIAIVLKDTQSIIFL	QSIIFLGKVTNPSEA_	K	D	T	G	K	V	0	0	0	1	0	1	0	1	0	2	1	1	0	1	0	1	1	0	0	0	0	10	0	1120.61	Q3ZEJ6;CON__A2I7N0;A2I7N0;Q9TTE1;CON__Q9TTE1;A2I7M9;A6QPQ2;A0A0A0MP89;G8JKW7	Q9TTE1	395	404	no	no	1;2	0	238.01	MS/MS	MS/MS	MS/MS	MS/MS	MS/MS	MS/MS	MS/MS	MS/MS
DVAMKPPSVYLLPPTR	KNAVSKPKDVAMKPPS	VYLLPPTREQLSLRES	K	D	V	T	R	E	1	1	0	1	0	0	0	0	0	0	2	1	1	0	4	1	1	0	1	2	0	16	1	1782.97	CON__Q1RMK2;G5E513	CON__Q1RMK2	467	482	yes	no	2;3	7.2826e-12	141.1	matching	MS/MS	matching	matching	matching	matching	matching	MS/MS
DVAQIFNNILR	LIDFEGKKDVAQIFNN	QIFNNILRRQIGTRTP	K	D	V	L	R	R	1	1	2	1	0	1	0	0	0	2	1	0	0	1	0	0	0	0	0	1	0	11	0	1301.71	Q29RI6	Q29RI6	97	107	yes	yes	2	0.00045211	126.19	matching	matching	matching	matching	matching	matching	matching	matching
DVDKEFYLFPTVFDENESLLLDDNIK	LLANGRLKDVDKEFYL	LLLDDNIKMFTTAPDQ	K	D	V	I	K	M	0	0	2	5	0	0	3	0	0	1	4	2	0	3	1	1	1	0	1	2	0	26	1	3117.51	F1N076	F1N076	568	593	yes	yes	3	9.6915e-17	98.924	matching	matching	matching	matching	matching	matching	matching	matching
DVELLYPR	QVANPLLRDVELLYPR	DVELLYPREAVSDLTQ	R	D	V	P	R	E	0	1	0	1	0	0	1	0	0	0	2	0	0	0	1	0	0	0	1	1	0	8	0	1003.53	Q0VCM5;F1MMP5;CON__Q0VCM5	Q0VCM5	477	484	yes	no	2	5.2531e-05	114.28	matching	matching	matching	matching	matching	matching	matching	matching
DVLAEV	FPLTSAIKDVLAEV__	IKDVLAEV________	K	D	V	E	V	-	1	0	0	1	0	0	1	0	0	0	1	0	0	0	0	0	0	0	0	2	0	6	0	644.338	G3X7D2	G3X7D2	386	391	yes	yes	1	0.012606	69.093	matching	matching	matching	matching	matching	matching	matching	matching
DVLATNGVIHFIDELLIPDSAK	GKPIISNKDVLATNGV	LLIPDSAKTLFELAAD	K	D	V	A	K	T	2	0	1	3	0	0	1	1	1	3	3	1	0	1	1	1	1	0	0	2	0	22	0	2379.27	F1MBS3	F1MBS3	334	355	yes	yes	3	0.0090978	51.566	matching	matching	matching	matching	matching	matching	matching	matching
DVMLQTTFLDSINTLPTTYEK	GRFVMRSRDVMLQTTF	TLPTTYEKGEYFAFLE	R	D	V	E	K	G	0	0	1	2	0	1	1	0	0	1	3	1	1	1	1	1	5	0	1	1	0	21	0	2429.2	Q3MHN2;CON__Q3MHN2	Q3MHN2	317	337	yes	no	2;3	0.00053925	93.255	matching	matching	matching	matching	matching	matching	matching	matching
DVPVITMETIGAESFHASTK	GLAEVGWRDVPVITME	ESFHASTKAGKLVTLP	R	D	V	T	K	A	2	0	0	1	0	0	2	1	1	2	0	1	1	1	1	2	3	0	0	2	0	20	0	2132.05	Q0VCW4;F1N0R8	Q0VCW4	187	206	yes	no	2;3	5.2375e-07	115.63	matching	matching	matching	matching	matching	matching	matching	matching
DVQDSVTVSNEAQTAK	NVQLVSHKDVQDSVTV	SNEAQTAKEFIKIIEH	K	D	V	A	K	E	2	0	1	2	0	2	1	0	0	0	0	1	0	0	0	2	2	0	0	3	0	16	0	1690.8	A4FUA8	A4FUA8	211	226	yes	yes	2	1.257e-105	178	matching	matching	matching	matching	matching	MS/MS	matching	matching
DVQQTLSPGDELYK	NYEVKGHRDVQQTLSP	SPGDELYKIIQQWPHY	R	D	V	Y	K	I	0	0	0	2	0	2	1	1	0	0	2	1	0	0	1	1	1	0	1	1	0	14	0	1591.77	Q8SPP7	Q8SPP7	166	179	yes	yes	2;3	0	284.79	matching	MS/MS	MS/MS	MS/MS	MS/MS	MS/MS	matching	matching
DVSEVVTPR	APGYEKVKDVSEVVTP	VSEVVTPRFLCTGGVD	K	D	V	P	R	F	0	1	0	1	0	0	1	0	0	0	0	0	0	0	1	1	1	0	0	3	0	9	0	1000.52	CON__Q3KUS7;P81187	CON__Q3KUS7	670	678	yes	no	2	3.9186e-12	157.99	matching	MS/MS	matching	MS/MS	MS/MS	MS/MS	matching	matching
DVTEVENSLR	SVLEDRSRDVTEVENS	TEVENSLRNINYKDHE	R	D	V	L	R	N	0	1	1	1	0	0	2	0	0	0	1	0	0	0	0	1	1	0	0	2	0	10	0	1160.57	Q3SYW2;A0A0A0MP91;Q0V7N2	Q3SYW2	316	325	yes	no	2	0.022819	81.92	matching	matching	matching	matching	matching	MS/MS	matching	matching
DVWGIEGPIDAAFTR	PGYPKLIRDVWGIEGP	PIDAAFTRVNCQGKTY	R	D	V	T	R	V	2	1	0	2	0	0	1	2	0	2	0	0	0	1	1	0	1	1	0	1	0	15	0	1645.81	Q3ZBS7;CON__Q3ZBS7	Q3ZBS7	194	208	yes	no	2	4.359e-33	168.45	matching	matching	matching	matching	matching	MS/MS	matching	matching
DWENQLEASMHSALSDLHETVPTVVGIPDGTAVVGR	SEPSEAVRDWENQLEA	DGTAVVGRSFRVTIPT	R	D	W	G	R	S	3	1	1	3	0	1	3	3	2	1	3	0	1	0	2	3	3	1	0	5	0	36	0	3829.86	O18738;F1N7D7	O18738	41	76	yes	no	4	0.038001	20.479	matching	matching	matching	matching	matching	matching	matching	matching
DWMTESFSSLK	SQVAQQARDWMTESFS	TESFSSLKDYWSSFKG	R	D	W	L	K	D	0	0	0	1	0	0	1	0	0	0	1	1	1	1	0	3	1	1	0	0	0	11	0	1329.59	P19035	P19035	61	71	yes	yes	2	9.8592e-35	178.46	matching	matching	matching	matching	matching	matching	matching	matching
DWNVDLIPK	PASMGRGRDWNVDLIP	WNVDLIPKFLMANGQL	R	D	W	P	K	F	0	0	1	2	0	0	0	0	0	1	1	1	0	0	1	0	0	1	0	1	0	9	0	1098.57	P50397;P21856	P50397	71	79	no	no	2	0.014078	89.827	matching	matching	matching	matching	matching	matching	matching	matching
DWSFYLLSHAEFTPNSK	QSDLSFSKDWSFYLLS	AEFTPNSKDQYSCRVK	K	D	W	S	K	D	1	0	1	1	0	0	1	0	1	0	2	1	0	2	1	3	1	1	1	0	0	17	0	2040.96	P01888	P01888	78	94	yes	yes	2;3	2.7343e-96	188.63	matching	matching	matching	matching	matching	MS/MS	MS/MS	MS/MS
DYALSPEDYALK	VTVKLGGKDYALSPED	SPEDYALKVSQAGTTV	K	D	Y	L	K	V	2	0	0	2	0	0	1	0	0	0	2	1	0	0	1	1	0	0	2	0	0	12	0	1383.66	F1MMR6;P80209	F1MMR6	346	357	yes	no	2	0.0030664	100.38	matching	matching	matching	matching	matching	matching	matching	matching
DYDLVGALR	LPKFKLEKDYDLVGAL	YDLVGALRALGVTALF	K	D	Y	L	R	A	1	1	0	2	0	0	0	1	0	0	2	0	0	0	0	0	0	0	1	1	0	9	0	1020.52	CON__ENSEMBL:ENSBTAP00000018574;A6QPP2	CON__ENSEMBL:ENSBTAP00000018574	399	407	yes	no	2	6.4029e-07	129.42	matching	matching	matching	matching	MS/MS	matching	matching	matching
DYDTTPPVVR	LLALLARKDYDTTPPV	DTTPPVVRWLNEQRYY	K	D	Y	V	R	W	0	1	0	2	0	0	0	0	0	0	0	0	0	0	2	0	2	0	1	2	0	10	0	1161.57	Q2UVX4;CON__Q2UVX4;G3X7A5	Q2UVX4	1244	1253	yes	no	2	7.5978e-06	145.25	MS/MS	MS/MS	MS/MS	MS/MS	matching	MS/MS	matching	MS/MS
DYETATLSDIK	KEAMLKHRDYETATLS	TATLSDIKALIRKHEA	R	D	Y	I	K	A	1	0	0	2	0	0	1	0	0	1	1	1	0	0	0	1	2	0	1	0	0	11	0	1254.6	A5D7D1	A5D7D1	440	450	yes	yes	2	0.00032513	108.35	matching	matching	matching	matching	matching	MS/MS	matching	matching
DYHAELMRELDQKEETIK	NTNIARKRDYHAELMR	DQKEETIKSVQEIAER	R	D	Y	I	K	S	1	1	0	2	0	1	4	0	1	1	2	2	1	0	0	0	1	0	1	0	0	18	2	2247.08	F1MPT5	F1MPT5	688	705	yes	yes	4	0.041226	41.542	matching	matching	matching	matching	matching	matching	matching	matching
DYLPIVLGSEMQK	FIQIITFRDYLPIVLG	VLGSEMQKWIPPYQGY	R	D	Y	Q	K	W	0	0	0	1	0	1	1	1	0	1	2	1	1	0	1	1	0	0	1	1	0	13	0	1491.76	P80025;G3MXZ0	P80025	428	440	yes	no	2	7.7503e-261	223.36	MS/MS	MS/MS	MS/MS	MS/MS	MS/MS	MS/MS	MS/MS	MS/MS
DYPVVSIEDPFDQDDWEAWQK	NLYKSFIRDYPVVSIE	DDWEAWQKFTASAGIQ	R	D	Y	Q	K	F	1	0	0	5	0	2	2	0	0	1	0	1	0	1	2	1	0	2	1	2	0	21	0	2581.13	Q9XSJ4;F1MB08	Q9XSJ4	286	306	yes	no	2;3	2.7808e-89	178.71	matching	matching	matching	matching	matching	MS/MS	matching	matching
DYQELMNTK	EDLARLLRDYQELMNT	YQELMNTKLALDLEIA	R	D	Y	T	K	L	0	0	1	1	0	1	1	0	0	0	1	1	1	0	0	0	1	0	1	0	0	9	0	1140.51	CON__P04264;G3N0V2;CON__ENSEMBL:ENSBTAP00000038253;CON__Q3TTY5	CON__P04264	464	472	yes	no	2	0.016725	93.561	matching	matching	matching	matching	matching	matching	MS/MS	matching
DYVAQFEASALGK	EAIKDSGRDYVAQFEA	FEASALGKQLNLKLLD	R	D	Y	G	K	Q	3	0	0	1	0	1	1	1	0	0	1	1	0	1	0	1	0	0	1	1	0	13	0	1397.68	P15497;CON__P15497	P15497	51	63	yes	no	1;2	0	262.48	MS/MS	MS/MS	MS/MS	MS/MS	MS/MS	MS/MS	MS/MS	MS/MS
DYVAQFEASALGKQLNLK	EAIKDSGRDYVAQFEA	LGKQLNLKLLDNWDTL	R	D	Y	L	K	L	3	0	1	1	0	2	1	1	0	0	3	2	0	1	0	1	0	0	1	1	0	18	1	1994.05	P15497;CON__P15497	P15497	51	68	yes	no	3	0.018537	55.755	matching	matching	matching	matching	matching	matching	matching	matching
DYWSSFK	TESFSSLKDYWSSFKG	KDYWSSFKGKFTDFWE	K	D	Y	F	K	G	0	0	0	1	0	0	0	0	0	0	0	1	0	1	0	2	0	1	1	0	0	7	0	931.408	P19035	P19035	72	78	yes	yes	2	0.010065	83.753	matching	matching	matching	matching	matching	matching	matching	matching
EAAEMLTADMDAER	ETGHPEIKEAAEMLTA	TADMDAERKFTKSFLP	K	E	A	E	R	K	4	1	0	2	0	0	3	0	0	0	1	0	2	0	0	0	1	0	0	0	0	14	0	1551.65	F1N4M7;CON__Q32PI4	F1N4M7	338	351	yes	no	2	6.2389e-134	195.1	matching	MS/MS	matching	MS/MS	MS/MS	MS/MS	matching	MS/MS
EAAEQDVEKK	GIRAKRAKEAAEQDVE	AEQDVEKKK_______	K	E	A	K	K	K	2	0	0	1	0	1	3	0	0	0	0	2	0	0	0	0	0	0	0	1	0	10	1	1145.56	Q56JZ1;F1MK30	Q56JZ1	201	210	yes	no	2	0.031999	41.164	matching	matching	matching	matching	matching	matching	matching	matching
EADESLNFEEQILEAAK	LKPRAKPKEADESLNF	EQILEAAKSIAAATSA	K	E	A	A	K	S	3	0	1	1	0	1	5	0	0	1	2	1	0	1	0	1	0	0	0	0	0	17	0	1934.91	F1MDH3	F1MDH3	2343	2359	yes	yes	2	2.8444e-197	200.33	matching	matching	matching	matching	matching	matching	matching	matching
EAEAAIYHLQLFEELR	RMQHLIAREAEAAIYH	LQLFEELRRLSPITSD	R	E	A	L	R	R	3	1	0	0	0	1	4	0	1	1	3	0	0	1	0	0	0	0	1	0	0	16	0	1930.98	A5D984	A5D984	384	399	yes	yes	3	0.0021379	84.753	matching	matching	matching	matching	matching	matching	matching	matching
EAEAAIYHLQLFEELRR	RMQHLIAREAEAAIYH	QLFEELRRLSPITSDP	R	E	A	R	R	L	3	2	0	0	0	1	4	0	1	1	3	0	0	1	0	0	0	0	1	0	0	17	1	2087.08	A5D984	A5D984	384	400	yes	yes	3	0.037934	41.621	matching	matching	matching	matching	matching	matching	matching	matching
EAFQLFDR	EDQTAEFKEAFQLFDR	EAFQLFDRTGDGKILY	K	E	A	D	R	T	1	1	0	1	0	1	1	0	0	0	1	0	0	2	0	0	0	0	0	0	0	8	0	1024.5	P60661	P60661	14	21	yes	yes	2	0.011988	94.309	matching	matching	matching	matching	matching	matching	matching	matching
EAFSLFDK	EEQIAEFKEAFSLFDK	EAFSLFDKDGDGTITT	K	E	A	D	K	D	1	0	0	1	0	0	1	0	0	0	1	1	0	2	0	1	0	0	0	0	0	8	0	955.465	P62157;F1N6C0	P62157	15	22	yes	no	2	0.028313	78.149	matching	matching	matching	matching	matching	matching	matching	matching
EAFSLFDKDGDGTITTK	EEQIAEFKEAFSLFDK	GDGTITTKELGTVMRS	K	E	A	T	K	E	1	0	0	3	0	0	1	2	0	1	1	2	0	2	0	1	3	0	0	0	0	17	1	1843.88	P62157;F1N6C0	P62157	15	31	yes	no	2;3	0	233.84	matching	matching	matching	matching	matching	MS/MS	matching	matching
EAFTMIGPR	DSVEFSCREAFTMIGP	AFTMIGPRFITCISGE	R	E	A	P	R	F	1	1	0	0	0	0	1	1	0	1	0	0	1	1	1	0	1	0	0	0	0	9	0	1020.51	Q28085;CON__Q28085;F1MC45;E1BFN5	Q28085	720	728	yes	no	2	0.0074663	113.18	matching	matching	matching	MS/MS	matching	matching	matching	matching
EAHLPVIENK	TFGEGLLKEAHLPVIE	HLPVIENKVCNRNEYL	K	E	A	N	K	V	1	0	1	0	0	0	2	0	1	1	1	1	0	0	1	0	0	0	0	1	0	10	0	1148.62	P06868;E1B726;CON__P06868	P06868	720	729	yes	no	2	0.0028962	108.43	matching	matching	matching	matching	matching	MS/MS	matching	matching
EALELLK	APNILENKEALELLKN	KEALELLKNAIGKAGY	K	E	A	L	K	N	1	0	0	0	0	0	2	0	0	0	3	1	0	0	0	0	0	0	0	0	0	7	0	814.48	Q9XSJ4;F1MB08;F1N0N9	Q9XSJ4	222	228	yes	no	2	0.035489	65.252	matching	matching	matching	matching	matching	MS/MS	matching	matching
EAPRPFSEQVSYVIQAEGK	WKLTRERREAPRPFSE	YVIQAEGKEHIIHLER	R	E	A	G	K	E	2	1	0	0	0	2	3	1	0	1	0	1	0	1	2	2	0	0	1	2	0	19	1	2134.07	F1MZJ5	F1MZJ5	32	50	yes	yes	3	2.2064e-81	170.47	matching	MS/MS	matching	matching	matching	MS/MS	matching	matching
EAPVEGEAAEPGSPTAAEGEAASAASSTSSPK	AGASPVEKEAPVEGEA	ASSTSSPKAEDGATPS	K	E	A	P	K	A	9	0	0	0	0	0	6	3	0	0	0	1	0	0	4	6	2	0	0	1	0	32	0	2942.33	P12624	P12624	105	136	yes	yes	3	2.3972e-05	51.094	matching	matching	matching	matching	matching	MS/MS	matching	matching
EAQAGTEQLLLSAAVPAGK	EMKAEFVREAQAGTEQ	SAAVPAGKIAIDRGYD	R	E	A	G	K	I	5	0	0	0	0	2	2	2	0	0	3	1	0	0	1	1	1	0	0	1	0	19	0	1852.99	G3X7D2;P30922	G3X7D2	172	190	yes	no	2;3	3.2503e-135	181.81	matching	MS/MS	matching	matching	matching	MS/MS	matching	MS/MS
EARERLLR	EREARELREARERLLR	EARERLLRRCFGDEPV	R	E	A	L	R	R	1	3	0	0	0	0	2	0	0	0	2	0	0	0	0	0	0	0	0	0	0	8	2	1041.6	Q0VCH4	Q0VCH4	325	332	yes	yes	2	0.00045001	122.13	matching	matching	matching	matching	matching	matching	matching	matching
EASDPQPEEADGGLK	FKFDHLRKEASDPQPE	EEADGGLKSWRESCDS	K	E	A	L	K	S	2	0	0	2	0	1	3	2	0	0	1	1	0	0	2	1	0	0	0	0	0	15	0	1541.68	A4FUA8	A4FUA8	104	118	yes	yes	2	0.00071223	123.76	matching	matching	matching	matching	matching	matching	matching	matching
EATESFASDPILYR	AETIKNVREATESFAS	ASDPILYRPVAVALDT	R	E	A	Y	R	P	2	1	0	1	0	0	2	0	0	1	1	0	0	1	1	2	1	0	1	0	0	14	0	1597.76	A5D984	A5D984	93	106	yes	yes	2	3.2138e-06	152.16	matching	matching	matching	matching	matching	matching	matching	matching
EATESFASDPILYRPVAVALDTK	AETIKNVREATESFAS	VAVALDTKGPEIRTGL	R	E	A	T	K	G	4	1	0	2	0	0	2	0	0	1	2	1	0	1	2	2	2	0	1	2	0	23	1	2492.28	A5D984	A5D984	93	115	yes	yes	3	5.4273e-05	81.807	matching	matching	matching	matching	matching	MS/MS	matching	matching
EATFQMELPK	VNKADAVREATFQMEL	TFQMELPKKAFITNFS	R	E	A	P	K	K	1	0	0	0	0	1	2	0	0	0	1	1	1	1	1	0	1	0	0	0	0	10	0	1192.58	F1MMD7;Q3T052;CON__Q3T052	F1MMD7	67	76	yes	no	2	2.5876e-33	158.47	matching	matching	matching	matching	matching	MS/MS	matching	matching
EAVQGASDLWR	DSWYSFFKEAVQGASD	QGASDLWRAYWDMRDA	K	E	A	W	R	A	2	1	0	1	0	1	1	1	0	0	1	0	0	0	0	1	0	1	0	1	0	11	0	1230.6	Q32L76	Q32L76	27	37	yes	yes	2	0.0037426	113.38	matching	matching	matching	matching	matching	matching	matching	matching
EAWHGAEEGEAPGAENQER	GGEWMEAKEAWHGAEE	PGAENQERGTRLGAEA	K	E	A	E	R	G	4	1	1	0	0	1	6	3	1	0	0	0	0	0	1	0	0	1	0	0	0	19	0	2065.87	E1BG05	E1BG05	595	613	yes	yes	3	9.7596e-05	87.388	matching	matching	matching	matching	matching	matching	matching	matching
ECDVMDTFKLYITTK	FKVKVGDKECDVMDTF	FKLYITTKLPNPAFTP	K	E	C	T	K	L	0	0	0	2	1	0	1	0	0	1	1	2	1	1	0	0	3	0	1	1	0	15	1	1862.88	G3N309;E1B9R5	G3N309	3673	3687	yes	no	2	0.027394	76.759	matching	matching	matching	matching	MS/MS	matching	matching	matching
EDAVLEYLK	EEHRGMLREDAVLEYL	DAVLEYLKIAQDLEMY	R	E	D	L	K	I	1	0	0	1	0	0	2	0	0	0	2	1	0	0	0	0	0	0	1	1	0	9	0	1078.55	Q2HJ49	Q2HJ49	185	193	yes	yes	2	1.1021e-18	156.35	matching	matching	matching	matching	matching	MS/MS	matching	matching
EDDENPNIPKPVSFR	LELDPPPKEDDENPNI	IPKPVSFRVKETVCPR	K	E	D	F	R	V	0	1	2	2	0	0	2	0	0	1	0	1	0	1	3	1	0	0	0	1	0	15	1	1755.84	P54229;P54228	P54229	66	80	yes	no	2;3	4.3987e-08	130.95	matching	matching	MS/MS	matching	matching	matching	matching	matching
EDDLEADFYDDLIPLEDNKDQEALGSGLATSSFR	VNFEVQTKEDDLEADF	GLATSSFRVPIFYSSK	K	E	D	F	R	V	3	1	1	7	0	1	4	2	0	1	5	1	0	2	1	3	1	0	1	0	0	34	1	3787.72	Q29RU4;F1MM86	Q29RU4	247	280	yes	no	3	2.5146e-05	60.029	matching	matching	matching	matching	matching	matching	matching	matching
EDDTWYAAGILSFDK	SAFVVHDKEDDTWYAA	AGILSFDKSCAVAEYG	K	E	D	D	K	S	2	0	0	3	0	0	1	1	0	1	1	1	0	1	0	1	1	1	1	0	0	15	0	1729.78	Q2TBU0;G3X6K8	Q2TBU0	360	374	yes	no	2	1.0322e-99	179.79	matching	matching	MS/MS	matching	matching	MS/MS	matching	matching
EDEFFSAFK	SIEIPYSREDEFFSAF	DEFFSAFKQASRREDD	R	E	D	F	K	Q	1	0	0	1	0	0	2	0	0	0	0	1	0	3	0	1	0	0	0	0	0	9	0	1118.49	P80457;F1MUT3	P80457	414	422	yes	no	2	0.0067183	99.815	matching	MS/MS	matching	matching	matching	matching	matching	matching
EDFLEQSEQLFGAK	LQKGFPIKEDFLEQSE	SEQLFGAKPMSLTGMK	K	E	D	A	K	P	1	0	0	1	0	2	3	1	0	0	2	1	0	2	0	1	0	0	0	0	0	14	0	1639.77	P28800;CON__P28800	P28800	177	190	yes	no	2	0	237.59	matching	matching	matching	MS/MS	matching	matching	matching	matching
EDGGGWWYNR	DPRKQCSKEDGGGWWY	GGGWWYNRCHAANPNG	K	E	D	N	R	C	0	1	1	1	0	0	1	3	0	0	0	0	0	0	0	0	0	2	1	0	0	10	0	1238.51	F1MAV0;CON__P02676;P02676	F1MAV0	431	440	yes	no	2	1.4509e-122	187.5	matching	MS/MS	matching	matching	matching	MS/MS	MS/MS	MS/MS
EDGNEEDKENQGDETQGQQPPQR	PPRQRQPREDGNEEDK	QGQQPPQRRYRRNFNY	R	E	D	Q	R	R	0	1	2	3	0	5	5	3	0	0	0	1	0	0	2	0	1	0	0	0	0	23	1	2627.1	P67808;F1MZ92	P67808	257	279	yes	no	3	1.2933e-05	124.73	matching	matching	MS/MS	matching	matching	MS/MS	matching	matching
EDGNTFIAFPDESDK	GRLFPFGKEDGNTFIA	AFPDESDKVLIGVCGH	K	E	D	D	K	V	1	0	1	3	0	0	2	1	0	1	0	1	0	2	1	1	1	0	0	0	0	15	0	1683.73	G3MZ19	G3MZ19	114	128	yes	yes	2	0.00029963	117.48	matching	MS/MS	matching	matching	matching	matching	matching	MS/MS
EDGSYNVTSILLK	YSSNYELKEDGSYNVT	NVTSILLKDDLCDYWI	K	E	D	L	K	D	0	0	1	1	0	0	1	1	0	1	2	1	0	0	0	2	1	0	1	1	0	13	0	1437.74	E1B6Z6	E1B6Z6	81	93	yes	yes	2	0.021203	78.401	matching	matching	matching	matching	matching	matching	matching	matching
EDIFMETLSDIMDYYK	ESALQRAREDIFMETL	SDIMDYYKDREGSHTF	R	E	D	Y	K	D	0	0	0	3	0	0	2	0	0	2	1	1	2	1	0	1	1	0	2	0	0	16	0	2011.88	Q3ZCH5	Q3ZCH5	91	106	yes	yes	2	0	253.06	matching	matching	matching	matching	matching	MS/MS	matching	matching
EDLISKEQIVIR	SKEPSISREDLISKEQ	SKEQIVIRSSRQPQSQ	R	E	D	I	R	S	0	1	0	1	0	1	2	0	0	3	1	1	0	0	0	1	0	0	0	1	0	12	1	1441.81	P80195	P80195	60	71	yes	yes	3	0.0012991	117.02	matching	matching	matching	matching	matching	matching	matching	matching
EDLIWK	VARSVDGKEDLIWKLL	GKEDLIWKLLSKAQEK	K	E	D	W	K	L	0	0	0	1	0	0	1	0	0	1	1	1	0	0	0	0	0	1	0	0	0	6	0	802.423	P24627	P24627	283	288	yes	yes	1;2	0.00010999	94.669	matching	matching	matching	matching	matching	MS/MS	matching	MS/MS
EDLPAENGETKNEESPASDEAEEK	EVANQETKEDLPAENG	ASDEAEEKEAKSD___	K	E	D	E	K	E	3	0	2	2	0	0	8	1	0	0	1	2	0	0	2	2	1	0	0	0	0	24	1	2617.12	P02316	P02316	73	96	yes	yes	3	0.0011477	89.663	matching	matching	matching	matching	matching	MS/MS	matching	matching
EDPAYLHYYDPAGGEDPLGAIR	KVRKFILREDPAYLHY	EDPLGAIRLRGCVVTS	R	E	D	I	R	L	3	1	0	3	0	0	2	3	1	1	2	0	0	0	3	0	0	0	3	0	0	22	0	2418.11	F1MRZ8	F1MRZ8	270	291	yes	yes	3	1.6166e-05	76.573	matching	matching	matching	matching	matching	matching	matching	matching
EDPTVLELK	ILLMDLNKEDPTVLEL	DPTVLELKMTGSNFDA	K	E	D	L	K	M	0	0	0	1	0	0	2	0	0	0	2	1	0	0	1	0	1	0	0	1	0	9	0	1042.55	Q2KIW1	Q2KIW1	93	101	yes	yes	2	0.016061	99.013	matching	matching	matching	matching	matching	matching	matching	matching
EDQTEYLEER	TKVILHLKEDQTEYLE	QTEYLEERRIKEIVKK	K	E	D	E	R	R	0	1	0	1	0	1	4	0	0	0	1	0	0	0	0	0	1	0	1	0	0	10	0	1310.56	Q76LV2;Q76LV1;G5E507	Q76LV2	192	201	no	no	2	2.1223e-86	176.78	matching	matching	matching	matching	matching	matching	matching	matching
EDSKADQFANEWGR	GMTRDQVREDSKADQF	QFANEWGRSGKDPNHF	R	E	D	G	R	S	2	1	1	2	0	1	2	1	0	0	0	1	0	1	0	1	0	1	0	0	0	14	1	1651.72	Q8SQ28;F1MHZ0	Q8SQ28	101	114	yes	no	2;3	3.8775e-94	178.68	matching	matching	matching	matching	matching	matching	matching	matching
EDVIWELLNHAQEHFGK	VARTVGGKEDVIWELL	HAQEHFGKDKPDNFQL	K	E	D	G	K	D	1	0	1	1	0	1	3	1	2	1	2	1	0	1	0	0	0	1	0	1	0	17	0	2064.01	G3X6N3;CON__Q0IIK2;CON__Q29443;Q29443	G3X6N3	283	299	yes	no	2;3;4	2.9146e-07	124.81	matching	matching	MS/MS	MS/MS	matching	MS/MS	MS/MS	matching
EDYLDIYVFGVGPLVNQENINALASK	GRNRKNPREDYLDIYV	NINALASKKDKEKHVF	R	E	D	S	K	K	2	0	3	2	0	1	2	2	0	2	3	1	0	1	1	1	0	0	2	3	0	26	0	2880.45	CON__Q3KUS7;P81187	CON__Q3KUS7	419	444	yes	no	2;3	8.948e-57	142.54	matching	MS/MS	MS/MS	MS/MS	MS/MS	MS/MS	MS/MS	MS/MS
EEAESTLQSFR	LQEEMLQREEAESTLQ	ESTLQSFRQDVDNASL	R	E	E	F	R	Q	1	1	0	0	0	1	3	0	0	0	1	0	0	1	0	2	1	0	0	0	0	11	0	1295.6	P48616	P48616	197	207	yes	yes	2	6.2803e-70	182.92	matching	MS/MS	matching	matching	matching	MS/MS	matching	MS/MS
EEAPSLRPVPPPISGGGYR	HRPYDKKKEEAPSLRP	PISGGGYRARPATATV	K	E	E	Y	R	A	1	2	0	0	0	0	2	3	0	1	1	0	0	0	5	2	0	0	1	1	0	19	1	1978.03	F1MAV0;CON__P02676;P02676	F1MAV0	58	76	yes	no	2;3	6.5072e-08	132.4	matching	MS/MS	matching	matching	MS/MS	MS/MS	MS/MS	matching
EEGSEQAPMNEDELINLIDGVLR	TAITHVHKEEGSEQAP	NLIDGVLRDDDKNNDG	K	E	E	L	R	D	1	1	2	2	0	1	5	2	0	2	3	0	1	0	1	1	0	0	0	1	0	23	0	2570.22	F6PZ29	F6PZ29	103	125	yes	yes	2;3	1.9895e-107	166.28	MS/MS	matching	matching	matching	matching	matching	MS/MS	matching
EEINALVQELGFYR	IPLSDMTREEINALVQ	VQELGFYRKASPDEPV	R	E	E	Y	R	K	1	1	1	0	0	1	3	1	0	1	2	0	0	1	0	0	0	0	1	1	0	14	0	1679.85	E1BKK9	E1BKK9	103	116	yes	yes	2	0.00026996	137.39	matching	matching	matching	matching	matching	matching	MS/MS	matching
EEIVDKYDLFVGSQATDFGEALVR	NKDGKLTKEEIVDKYD	DFGEALVRHDEF____	K	E	E	V	R	H	2	1	0	3	0	1	3	2	0	1	2	1	0	2	0	1	1	0	1	3	0	24	1	2700.33	Q3T0K1;F1N3H1	Q3T0K1	288	311	yes	no	3	1.2258e-51	144.4	matching	matching	matching	matching	MS/MS	MS/MS	matching	matching
EELEGQLGPMAQETQAR	MKEVKAYKEELEGQLG	MAQETQARVSKELQAA	K	E	E	A	R	V	2	1	0	0	0	3	4	2	0	0	2	0	1	0	1	0	1	0	0	0	0	17	0	1885.88	Q03247;CON__Q03247	Q03247	93	109	yes	no	2;3	0	257.46	matching	MS/MS	matching	matching	matching	matching	matching	MS/MS
EELENKNEEVQQLHMQLEIQKK	EEQLEQFREELENKNE	MQLEIQKKESTTRLQE	R	E	E	K	K	E	0	0	2	0	0	4	6	0	1	1	3	3	1	0	0	0	0	0	0	1	0	22	2	2736.38	F1MXF5	F1MXF5	2193	2214	yes	yes	3	0.00037006	68.088	matching	matching	matching	matching	matching	matching	matching	matching
EELISTLQTQLSQTQAEQAAQK	MKKQLQEKEELISTLQ	QAEQAAQKLRVLQRKL	K	E	E	Q	K	L	3	0	0	0	0	6	3	0	0	1	3	1	0	0	0	2	3	0	0	0	0	22	0	2444.24	G3MX38	G3MX38	83	104	yes	yes	3	0.00045918	72.968	matching	matching	matching	matching	matching	matching	matching	MS/MS
EELQANGSAPAADKEEPAAAGSGAASPAAAEK	AAAEPGAKEELQANGS	ASPAAAEKDEPAAAAP	K	E	E	E	K	D	12	0	1	1	0	1	5	3	0	0	1	2	0	0	3	3	0	0	0	0	0	32	1	2965.39	P12624;E1B916;F1N2N5	P12624	56	87	yes	no	3	4.3407e-06	62.67	matching	matching	matching	matching	matching	matching	matching	matching
EELQANGSAPAADKEEPAAAGSGAASPAAAEKDEPAAAAPDAGASPVEK	AAAEPGAKEELQANGS	AGASPVEKEAPVEGEA	K	E	E	E	K	E	18	0	1	3	0	1	7	4	0	0	1	3	0	0	6	4	0	0	0	1	0	49	2	4542.13	P12624;E1B916;F1N2N5	P12624	56	104	yes	no	4	0.016501	12.226	matching	matching	matching	matching	matching	matching	matching	matching
EELQRNMSLQLMQNTNSSQKIR	LNKLQNFKEELQRNMS	TNSSQKIRNLSIKLEE	K	E	E	I	R	N	0	2	3	0	0	4	2	0	0	1	3	1	2	0	0	3	1	0	0	0	0	22	2	2647.32	F1MDM0	F1MDM0	76	97	yes	yes	3	0.0070339	54.511	matching	matching	matching	matching	matching	matching	matching	matching
EELQSGVDAANTAAQEYQR	GQAEPLQKEELQSGVD	TAAQEYQRRLAAVAAI	K	E	E	Q	R	R	4	1	1	1	0	3	3	1	0	0	1	0	0	0	0	1	1	0	1	1	0	19	0	2078.95	F1MC48	F1MC48	321	339	yes	yes	2	2.8934e-06	119.5	matching	matching	matching	matching	matching	matching	matching	matching
EELTTVMSFLTQQLGPDLVDAAQAR	QLFADLSREELTTVMS	LVDAAQARPSDNCVFS	R	E	E	A	R	P	3	1	0	2	0	3	2	1	0	0	4	0	1	1	1	1	3	0	0	2	0	25	0	2732.37	Q29437	Q29437	65	89	yes	yes	3;4	0	258.81	matching	matching	matching	MS/MS	MS/MS	MS/MS	matching	matching
EEMVYELNPLDPLGR	EREGALHREEMVYELN	NPLDPLGRTLEIPGNS	R	E	E	G	R	T	0	1	1	1	0	0	3	1	0	0	3	0	1	0	2	0	0	0	1	1	0	15	0	1773.86	E1BH06;CON__P01030;P01030	E1BH06	940	954	yes	no	2	0.019284	75.316	matching	matching	matching	matching	matching	matching	matching	matching
EEMVYELNPLDPR	EREGALHREEMVYELN	ELNPLDPRGRTLEIPG	R	E	E	P	R	G	0	1	1	1	0	0	3	0	0	0	2	0	1	0	2	0	0	0	1	1	0	13	0	1603.76	CON__ENSEMBL:ENSBTAP00000007350	CON__ENSEMBL:ENSBTAP00000007350	941	953	yes	yes	2	0.0016655	135.94	matching	matching	matching	matching	matching	matching	matching	matching
EEPCALGSQAVK	LNIKQEPREEPCALGS	ALGSQAVKREANGEPV	R	E	E	V	K	R	2	0	0	0	1	1	2	1	0	0	1	1	0	0	1	1	0	0	0	1	0	12	0	1287.61	G3MZF2;E1B9N8	G3MZF2	4304	4315	yes	no	2	0.034619	69.65	matching	matching	matching	matching	matching	matching	matching	matching
EEQFNSTYR	NTATTKPREEQFNSTY	EQFNSTYRVVSALRIQ	R	E	E	Y	R	V	0	1	1	0	0	1	2	0	0	0	0	0	0	1	0	1	1	0	1	0	0	9	0	1172.51	CON__ENSEMBL:ENSBTAP00000024462;CON__ENSEMBL:ENSBTAP00000024466;G3N0V0	CON__ENSEMBL:ENSBTAP00000024462	263	271	no	no	2	0.0312	81.525	matching	matching	matching	matching	matching	matching	matching	matching
EERPAGEQAEEPTEVK	EDGCGSPKEERPAGEQ	AEEPTEVKERVASEEE	K	E	E	V	K	E	2	1	0	0	0	1	6	1	0	0	0	1	0	0	2	0	1	0	0	1	0	16	1	1797.84	Q3ZBT0;F1MMB8	Q3ZBT0	274	289	yes	no	2;3	3.779e-25	164.66	matching	matching	matching	matching	matching	matching	matching	matching
EESLPLVGQQSTVSDVPR	SIVALNSKEESLPLVG	STVSDVPRDLEVIAAT	K	E	E	P	R	D	0	1	0	1	0	2	2	1	0	0	2	0	0	0	2	3	1	0	0	3	0	18	0	1939.99	B8Y9S9;P07589;G5E5A9;B8Y9T0	B8Y9S9	1436	1453	yes	no	2	1.453e-31	160.09	matching	matching	matching	matching	matching	matching	matching	matching
EETRQVYMDLNSNIEK	TKKYEYEREETRQVYM	DLNSNIEKMIIAFEEL	R	E	E	E	K	M	0	1	2	1	0	1	3	0	0	1	1	1	1	0	0	1	1	0	1	1	0	16	1	1967.93	E1BLN1	E1BLN1	206	221	yes	yes	2	0.00046187	103.76	matching	matching	matching	matching	matching	matching	matching	matching
EEVLQLGALIYR	RGYHKCTREEVLQLGA	QLGALIYRVKFEEDKS	R	E	E	Y	R	V	1	1	0	0	0	1	2	1	0	1	3	0	0	0	0	0	0	0	1	1	0	12	0	1402.78	F1MHG0	F1MHG0	2027	2038	yes	yes	3	0.034771	52.247	matching	matching	matching	matching	MS/MS	matching	matching	matching
EEVPAADLSDQVPDTESETK	LGQGGVQREEVPAADL	PDTESETKILLQGTPV	R	E	E	T	K	I	2	0	0	3	0	1	4	0	0	0	1	1	0	0	2	2	2	0	0	2	0	20	0	2158.98	Q2UVX4;CON__Q2UVX4;G3X7A5	Q2UVX4	959	978	yes	no	2;3	0	216.31	MS/MS	MS/MS	MS/MS	MS/MS	MS/MS	MS/MS	MS/MS	MS/MS
EFADSLGIPFLETSAK	VVDNTTAKEFADSLGI	PFLETSAKNATNVEQA	K	E	F	A	K	N	2	0	0	1	0	0	2	1	0	1	2	1	0	2	1	2	1	0	0	0	0	16	0	1723.87	Q2HJH2;A1L528;Q3ZBD1	Q2HJH2	138	153	yes	no	2	0.0010126	99.344	matching	matching	matching	matching	matching	matching	matching	matching
EFEELIDANHDGIVTMAELEDYMDPMNEFSALNEAK	SWVRDRKREFEELIDA	FSALNEAKQMIAIADE	R	E	F	A	K	Q	4	0	3	4	0	0	7	1	1	2	3	1	3	2	1	1	1	0	1	1	0	36	0	4129.81	Q3ZBZ1;F1MKI5	Q3ZBZ1	278	313	yes	no	3	0.0018878	45.652	matching	matching	matching	matching	matching	matching	MS/MS	matching
EFGIDPQNMFEFWDWVGGR	STNTAKVKEFGIDPQN	FWDWVGGRYSLWSAIG	K	E	F	G	R	Y	0	1	1	2	0	1	2	3	0	1	0	0	1	3	1	0	0	2	0	1	0	19	0	2329.03	Q3ZBD7;CON__Q3ZBD7	Q3ZBD7	255	273	no	no	2;3	0.00094091	96.012	matching	matching	matching	matching	matching	MS/MS	matching	matching
EFLDVIK	EVTQEQKKEFLDVIKC	KEFLDVIKCIGIQESE	K	E	F	I	K	C	0	0	0	1	0	0	1	0	0	1	1	1	0	1	0	0	0	0	0	1	0	7	0	862.48	Q5GN72;Q3SZR3;CON__Q3SZR3	Q5GN72	159	165	yes	no	2	0.030312	67.981	matching	matching	matching	matching	matching	matching	matching	matching
EFMPPGLQELIPFVK	ILVPEKLKEFMPPGLQ	QELIPFVKAAPIDQEP	K	E	F	V	K	A	0	0	0	0	0	1	2	1	0	1	2	1	1	2	3	0	0	0	0	1	0	15	0	1743.93	Q9GMB8	Q9GMB8	458	472	yes	yes	2	3.206e-08	135.72	matching	matching	matching	matching	matching	matching	matching	matching
EFQGKLLR	QSLQRGLREFQGKLLR	EFQGKLLRDLEYKTVS	R	E	F	L	R	D	0	1	0	0	0	1	1	1	0	0	2	1	0	1	0	0	0	0	0	0	0	8	1	989.566	G3X823	G3X823	306	313	yes	yes	1;2	0.0022055	116.25	matching	matching	matching	matching	matching	MS/MS	matching	MS/MS
EFYLFPTVFDENESLLLDDNIK	GRLKDVDKEFYLFPTV	LLLDDNIKMFTTAPDQ	K	E	F	I	K	M	0	0	2	3	0	0	3	0	0	1	4	1	0	3	1	1	1	0	1	1	0	22	0	2660.29	F1N076;CON__ENSEMBL:ENSBTAP00000031900	F1N076	572	593	no	no	2;3	1.6792e-157	184.83	matching	MS/MS	MS/MS	MS/MS	MS/MS	MS/MS	matching	matching
EGAAHAFAQYNMDQFTPVK	LNNDNLLREGAAHAFA	MDQFTPVKIEGYEDQV	R	E	G	V	K	I	4	0	1	1	0	2	1	1	1	0	0	1	1	2	1	0	1	0	1	1	0	19	0	2123.97	A4FUA8	A4FUA8	48	66	yes	yes	3	0.00055273	94.61	matching	matching	matching	matching	matching	matching	matching	matching
EGAHYLVWGVSSDLWGEKPK	CREALKLKEGAHYLVW	DLWGEKPKISYIIGKD	K	E	G	P	K	I	1	0	0	1	0	0	2	3	1	0	2	2	0	0	1	2	0	2	1	2	0	20	1	2257.12	Q2UVX4;CON__Q2UVX4;G3X7A5	Q2UVX4	1596	1615	yes	no	3;4	8.8145e-86	174.68	matching	matching	MS/MS	matching	matching	matching	MS/MS	MS/MS
EGESLEDLMK	EALAALLREGESLEDL	ESLEDLMKLSPEELLL	R	E	G	M	K	L	0	0	0	1	0	0	3	1	0	0	2	1	1	0	0	1	0	0	0	0	0	10	0	1149.52	F1MYX5	F1MYX5	254	263	yes	yes	2	0.012228	99.788	matching	matching	matching	matching	matching	MS/MS	matching	matching
EGFGHLSPTGNTEFWLGNEK	KKNWIQYKEGFGHLSP	EFWLGNEKIHLISTQS	K	E	G	E	K	I	0	0	2	0	0	0	3	4	1	0	2	1	0	2	1	1	2	1	0	0	0	20	0	2219.03	Q3SZZ9;F1MGU7	Q3SZZ9	237	256	yes	no	2;3	0	216.16	matching	MS/MS	matching	matching	matching	MS/MS	MS/MS	MS/MS
EGFPSFQAVAYLNDQPFFHYNSEGR	YTGLSKPREGFPSFQA	FHYNSEGRRAEPLAPW	R	E	G	G	R	R	2	1	2	1	0	2	2	2	1	0	1	0	0	4	2	2	0	0	2	1	0	25	0	2919.33	Q3ZCH5	Q3ZCH5	39	63	yes	yes	3	4.3531e-38	133.98	MS/MS	matching	matching	matching	matching	matching	MS/MS	MS/MS
EGIHAQQK	EERLHSMKEGIHAQQK	EGIHAQQKEPMIGVNQ	K	E	G	Q	K	E	1	0	0	0	0	2	1	1	1	1	0	1	0	0	0	0	0	0	0	0	0	8	0	909.467	CON__P02662;P02662	CON__P02662	125	132	yes	no	2	4.7147e-14	155	matching	matching	MS/MS	MS/MS	matching	matching	matching	matching
EGIHAQQKEPMIGVNQELAYFYPELFR	EERLHSMKEGIHAQQK	YFYPELFRQFYQLDAY	K	E	G	F	R	Q	2	1	1	0	0	3	4	2	1	2	2	1	1	2	2	0	0	0	2	1	0	27	1	3206.59	CON__P02662;P02662	CON__P02662	125	151	yes	no	4	0.0031495	45.679	matching	matching	matching	matching	matching	MS/MS	matching	matching
EGLAPEASEPSGPQEPMQGSPGLAETK	LSPDSEPREGLAPEAS	SPGLAETKEAEAQHQS	R	E	G	T	K	E	3	0	0	0	0	2	5	4	0	0	2	1	1	0	5	3	1	0	0	0	0	27	0	2693.25	Q0P5E0	Q0P5E0	160	186	yes	yes	3	2.0724e-36	138.25	matching	matching	matching	matching	MS/MS	MS/MS	matching	matching
EGLELPEDEEEK	KTLVSVTKEGLELPED	LPEDEEEKKKQEEKKT	K	E	G	E	K	K	0	0	0	1	0	0	6	1	0	0	2	1	0	0	1	0	0	0	0	0	0	12	0	1415.63	Q76LV2;Q76LV1;G5E507;G3N2V5	Q76LV2	548	559	no	no	2	0.024376	77.674	matching	matching	matching	matching	matching	MS/MS	matching	matching
EGLLLLSRPDR	GLKVTMDKEGLLLLSR	LLLSRPDRVTIGLLFW	K	E	G	D	R	V	0	2	0	1	0	0	1	1	0	0	4	0	0	0	1	1	0	0	0	0	0	11	1	1267.72	F1MMD7;Q3T052;CON__Q3T052	F1MMD7	818	828	yes	no	2	0.011412	109.83	matching	matching	matching	matching	matching	matching	matching	matching
EGMLLQATDVMLR	MLENSQMREGMLLQAT	QATDVMLRGELQKLQA	R	E	G	L	R	G	1	1	0	1	0	1	1	1	0	0	3	0	2	0	0	0	1	0	0	1	0	13	0	1475.75	Q0VCG9;G3X6Q8	Q0VCG9	70	82	yes	no	2	3.6619e-38	156.08	matching	matching	matching	matching	matching	matching	matching	matching
EGMNIVEAMER	HVVFGKVKEGMNIVEA	NIVEAMERFGSRNGKT	K	E	G	E	R	F	1	1	1	0	0	0	3	1	0	1	0	0	2	0	0	0	0	0	0	1	0	11	0	1277.57	P62935	P62935	134	144	yes	yes	2	6.8887e-25	173.76	matching	matching	matching	matching	matching	matching	matching	matching
EGNPEEDLTADR	LGPKPSLKEGNPEEDL	EEDLTADRTNAQAAAL	K	E	G	D	R	T	1	1	1	2	0	0	3	1	0	0	1	0	0	0	1	0	1	0	0	0	0	12	0	1344.58	Q865V6	Q865V6	233	244	yes	yes	2	0.0013402	109.6	matching	matching	matching	matching	matching	matching	matching	matching
EGQEQEGEEMAEYR	SPAVFVSREGQEQEGE	GEEMAEYRGRVSLVED	R	E	G	Y	R	G	1	1	0	0	0	2	6	2	0	0	0	0	1	0	0	0	0	0	1	0	0	14	0	1683.67	P18892;E1BHI7;F1MZQ4	P18892	79	92	yes	no	2	0	275.66	MS/MS	matching	MS/MS	MS/MS	matching	matching	MS/MS	MS/MS
EGQTFYYAEDYHQQYLSK	GLITTDIREGQTFYYA	YHQQYLSKDPDGYCGL	R	E	G	S	K	D	1	0	0	1	0	3	2	1	1	0	1	1	0	1	0	1	1	0	4	0	0	18	0	2269	P54149	P54149	195	212	yes	yes	3	0.043378	41.359	matching	matching	matching	matching	matching	matching	matching	matching
EGYSLVGDPVAR	KNIMYTCKEGYSLVGD	LVGDPVARCGEDLQWL	K	E	G	A	R	C	1	1	0	1	0	0	1	2	0	0	1	0	0	0	1	1	0	0	1	2	0	12	0	1261.63	Q29RQ1;F1N045;CON__Q29RQ1	Q29RQ1	601	612	yes	no	2	0.027558	85.672	matching	MS/MS	matching	matching	matching	matching	matching	matching
EHFVDLLLSK	LSKVESDREHFVDLLL	FVDLLLSKHFRTFMLA	R	E	H	S	K	H	0	0	0	1	0	0	1	0	1	0	3	1	0	1	0	1	0	0	0	1	0	10	0	1199.65	Q5GN72;Q3SZR3;CON__Q3SZR3	Q5GN72	115	124	yes	no	2;3	1.6426e-49	169.99	matching	MS/MS	MS/MS	MS/MS	MS/MS	MS/MS	MS/MS	MS/MS
EHFYATNDHYFVDQYMR	NDLVAVGREHFYATND	YFVDQYMRSWELYLGL	R	E	H	M	R	S	1	1	1	2	0	1	1	0	2	0	0	0	1	2	0	0	1	0	3	1	0	17	0	2234.95	Q2KIW1	Q2KIW1	176	192	yes	yes	3	0.023268	54.859	matching	matching	matching	matching	matching	matching	matching	matching
EHPIFSEVVSDQEAVAALEK	AQAMKVYREHPIFSEV	EAVAALEKFVDDEKIL	R	E	H	E	K	F	3	0	0	1	0	1	4	0	1	1	1	1	0	1	1	2	0	0	0	3	0	20	0	2197.09	Q0VCW4;F1N0R8	Q0VCW4	238	257	yes	no	2;3	1.4802e-220	199.05	matching	matching	matching	matching	matching	matching	matching	matching
EIAEAYETLSDANR	PDAEAKFREIAEAYET	ETLSDANRRKEYDTLG	R	E	I	N	R	R	3	1	1	1	0	0	3	0	0	1	1	0	0	0	0	1	1	0	1	0	0	14	0	1580.73	G3MZ88	G3MZ88	69	82	yes	yes	2	2.2613e-159	204.18	matching	matching	MS/MS	matching	matching	matching	matching	MS/MS
EIAEAYLGK	SMVLTKMKEIAEAYLG	IAEAYLGKTVTNAVVT	K	E	I	G	K	T	2	0	0	0	0	0	2	1	0	1	1	1	0	0	0	0	0	0	1	0	0	9	0	992.518	P19120	P19120	129	137	yes	yes	2	0.030234	76.221	matching	matching	matching	matching	matching	matching	matching	matching
EIALWFRPEELVNYK	DSVESAEKEIALWFRP	PEELVNYKSCAQNWIY	K	E	I	Y	K	S	1	1	1	0	0	0	3	0	0	1	2	1	0	1	1	0	0	1	1	1	0	15	1	1906	P52175	P52175	129	143	yes	yes	3	0.02219	63.966	matching	matching	matching	matching	matching	matching	matching	matching
EIELQVNEIEKEKEEAEK	PLKMFSAKEIELQVNE	KEKEEAEKKKSKKTT_	K	E	I	E	K	K	1	0	1	0	0	1	8	0	0	2	1	3	0	0	0	0	0	0	0	1	0	18	2	2186.1	E1BD83	E1BD83	237	254	yes	yes	2	0.0023582	82.59	matching	matching	matching	matching	matching	matching	matching	matching
EIETYHNLLEGGQEDFESSGAGK	SIKMRLEKEIETYHNL	FESSGAGKIGLGGRGG	K	E	I	G	K	I	1	0	1	1	0	1	5	4	1	1	2	1	0	1	0	2	1	0	1	0	0	23	0	2509.12	CON__P35527	CON__P35527	450	472	yes	yes	3	1.8717e-55	153.83	matching	matching	matching	matching	matching	matching	MS/MS	matching
EIFFNILVQGAEEAQK	DEDTKNLKEIFFNILV	QGAEEAQKERQRQKEL	K	E	I	Q	K	E	2	0	1	0	0	2	3	1	0	2	1	1	0	2	0	0	0	0	0	1	0	16	0	1834.95	F1MX65;Q3MHX6	F1MX65	620	635	yes	no	3	0.00032576	95.822	matching	matching	matching	matching	matching	matching	matching	matching
EIGNLLHPSVPISDDEDADNKVER	AERFESLREIGNLLHP	DADNKVERIWGDCTVR	R	E	I	E	R	I	1	1	2	4	0	0	3	1	1	2	2	1	0	0	2	2	0	0	0	2	0	24	1	2661.29	Q9GMB8	Q9GMB8	134	157	yes	yes	3	1.4014e-51	143.74	matching	matching	matching	matching	matching	matching	matching	matching
EIHHSFQHLLQALNQPSNQLQLSVGNAMFVQEELK	NLTEIQEKEIHHSFQH	MFVQEELKLLDKFIED	K	E	I	L	K	L	2	0	3	0	0	6	3	1	3	1	6	1	1	2	1	3	0	0	0	2	0	35	0	4027.04	Q9TTE1;CON__Q9TTE1;A2I7M9	Q9TTE1	108	142	yes	no	4	2.1009e-05	48.672	matching	matching	matching	matching	matching	matching	matching	matching
EILVGDVGQTVDDPYATFVK	NIILEEGKEILVGDVG	DPYATFVKMLPDKDCR	K	E	I	V	K	M	1	0	0	3	0	1	1	2	0	1	1	1	0	1	1	0	2	0	1	4	0	20	0	2165.09	Q5E9F7	Q5E9F7	54	73	yes	yes	2;3	0	250.39	matching	matching	matching	matching	MS/MS	MS/MS	matching	matching
EINLAPDSSSVVVSGLMVATK	KEKTGPMKEINLAPDS	SGLMVATKYEVSVYAL	K	E	I	T	K	Y	2	0	1	1	0	0	1	1	0	1	2	1	1	0	1	4	1	0	0	4	0	21	0	2116.11	B8Y9S9;P07589;G5E5A9;B8Y9T0	B8Y9S9	1768	1788	yes	no	2	0.012659	56.29	matching	matching	matching	matching	matching	matching	matching	matching
EIPAWVPLDPAAQNTK	QDFIKFDKEIPAWVPL	DPAAQNTKRKWEAEAV	K	E	I	T	K	R	3	0	1	1	0	1	1	0	0	1	1	1	0	0	3	0	1	1	0	1	0	16	0	1748.91	Q3ZCH5	Q3ZCH5	147	162	yes	yes	2	0.00026882	113.47	matching	matching	matching	matching	matching	MS/MS	MS/MS	MS/MS
EIRPALELLEPIEQK	VETKEPEKEIRPALEL	LLEPIEQKFVSISDLL	K	E	I	Q	K	F	1	1	0	0	0	1	4	0	0	2	3	1	0	0	2	0	0	0	0	0	0	15	1	1777	P50397	P50397	365	379	yes	yes	3	1.6144e-162	192.4	matching	matching	matching	matching	matching	matching	matching	matching
EISPDTTLLDLQNNDISELR	LGLKAVPKEISPDTTL	NNDISELRKDDFKGLQ	K	E	I	L	R	K	0	1	2	3	0	1	2	0	0	2	4	0	0	0	1	2	2	0	0	0	0	20	0	2285.14	P21809	P21809	88	107	yes	yes	2	6.9514e-17	127.37	matching	MS/MS	matching	matching	matching	matching	matching	matching
EISPDTTLLDLQNNDISELRK	LGLKAVPKEISPDTTL	NDISELRKDDFKGLQH	K	E	I	R	K	D	0	1	2	3	0	1	2	0	0	2	4	1	0	0	1	2	2	0	0	0	0	21	1	2413.23	P21809	P21809	88	108	yes	yes	3	0.00094963	68.123	matching	MS/MS	matching	matching	matching	matching	matching	matching
EITALAPSTMK	GIADRMQKEITALAPS	ALAPSTMKIKIIAPPE	K	E	I	M	K	I	2	0	0	0	0	0	1	0	0	1	1	1	1	0	1	1	2	0	0	0	0	11	0	1160.61	P63258;P60712;Q5E9B5;F1MKC4;Q3ZC07;P68138;P62739;G8JKX4	P63258	316	326	no	no	2	7.1406e-11	163.12	matching	MS/MS	matching	MS/MS	MS/MS	MS/MS	matching	matching
EITENLMTTGDLDQDGK	PLPGYRVREITENLMT	GDLDQDGKISFDEFIK	R	E	I	G	K	I	0	0	1	3	0	1	2	2	0	1	2	1	1	0	0	0	3	0	0	0	0	17	0	1878.85	F1MYX5	F1MYX5	52	68	yes	yes	2	0	252.79	matching	MS/MS	MS/MS	MS/MS	MS/MS	MS/MS	matching	matching
EITENLMTTGDLDQDGKISFDEFIK	PLPGYRVREITENLMT	ISFDEFIKVFHGLKST	R	E	I	I	K	V	0	0	1	4	0	1	3	2	0	3	2	2	1	2	0	1	3	0	0	0	0	25	1	2858.35	F1MYX5	F1MYX5	52	76	yes	yes	3	1.4077e-05	81.884	matching	matching	matching	matching	matching	matching	matching	matching
EKDVSLTAFVLIALHEAK	IGGFRDTREKDVSLTA	LIALHEAKDICEAQVN	R	E	K	A	K	D	3	0	0	1	0	0	2	0	1	1	3	2	0	1	0	1	1	0	0	2	0	18	1	1983.1	Q2UVX4;CON__Q2UVX4;G3X7A5	Q2UVX4	1137	1154	yes	no	3	1.1408e-33	136.34	matching	MS/MS	matching	matching	matching	matching	matching	matching
EKEQEIKLQK	AKHAIQIKEKEQEIKL	EQEIKLQKQGELEEED	K	E	K	Q	K	Q	0	0	0	0	0	2	3	0	0	1	1	3	0	0	0	0	0	0	0	0	0	10	2	1271.71	F1MNS0	F1MNS0	2005	2014	yes	yes	2	0.0011635	140.17	matching	matching	matching	matching	matching	matching	MS/MS	matching
EKGDPEQQNEVEEEEDDEDEDEDEDER	PSREPEMKEKGDPEQQ	EDEDEDERQLLGEFEK	K	E	K	E	R	Q	0	1	1	7	0	2	12	1	0	0	0	1	0	0	1	0	0	0	0	1	0	27	1	3279.21	F1MX65;Q3MHX6	F1MX65	404	430	yes	no	3	0	207.64	MS/MS	matching	matching	matching	matching	matching	matching	matching
EKLEATINELI	GEFSGANKEKLEATIN	EATINELI________	K	E	K	L	I	-	1	0	1	0	0	0	3	0	0	2	2	1	0	0	0	0	1	0	0	0	0	11	1	1271.7	G8JKZ8;O97680	G8JKZ8	87	97	yes	no	2	1.5531e-58	166.24	matching	matching	matching	matching	MS/MS	matching	matching	matching
EKLQNEDLGFL	YQVLPWLKEKLQNEDL	QNEDLGFL________	K	E	K	F	L	-	0	0	1	1	0	1	2	1	0	0	3	1	0	1	0	0	0	0	0	0	0	11	1	1304.66	CON__Q3KUS7;P81187	CON__Q3KUS7	750	760	yes	no	2	2.3913e-249	215.08	matching	MS/MS	matching	matching	MS/MS	MS/MS	matching	matching
EKVNELSKDIGSESTEDQAMEDIK	PFPEVFGKEKVNELSK	DQAMEDIKQMEAESIS	K	E	K	I	K	Q	1	0	1	3	0	1	5	1	0	2	1	3	1	0	0	3	1	0	0	1	0	24	2	2694.25	CON__P02662;P02662	CON__P02662	35	58	yes	no	3	0.00040836	89.201	matching	matching	matching	matching	matching	matching	matching	matching
EKYYGYTGAFR	DKCVPNSKEKYYGYTG	YGYTGAFRCLAEDVGD	K	E	K	F	R	C	1	1	0	0	0	0	1	2	0	0	0	1	0	1	0	0	1	0	3	0	0	11	1	1353.64	P24627	P24627	540	550	yes	yes	2	0.038473	107.09	matching	matching	matching	matching	matching	matching	matching	matching
ELAAQLIK	VEASFLPKELAAQLIK	ELAAQLIKKSFSGKKG	K	E	L	I	K	K	2	0	0	0	0	1	1	0	0	1	2	1	0	0	0	0	0	0	0	0	0	8	0	884.533	Q0VCM5;F1MMP5;CON__Q0VCM5	Q0VCM5	210	217	yes	no	2	5.1735e-14	157.33	matching	matching	matching	matching	matching	matching	matching	matching
ELAEQYENEMFDYEQLSELLKK	EEAIALGKELAEQYEN	QLSELLKKQAQFYENI	K	E	L	K	K	Q	1	0	1	1	0	2	6	0	0	0	4	2	1	1	0	1	0	0	2	0	0	22	1	2748.28	F1MIX6	F1MIX6	1299	1320	yes	yes	4	0.03415	17.351	matching	matching	matching	matching	matching	matching	matching	matching
ELASQPDVDGFLVGGASLKPEFVDIINAK	SVTGATCKELASQPDV	FVDIINAKQ_______	K	E	L	A	K	Q	3	0	1	3	0	1	2	3	0	2	3	2	0	2	2	2	0	0	0	3	0	29	1	3028.58	Q5E956	Q5E956	220	248	yes	yes	3	2.6392e-11	84.947	matching	matching	matching	matching	matching	matching	matching	matching
ELDELVSAVEEHFFQPQK	SDPEQLKKELDELVSA	EHFFQPQKYNLQPKGE	K	E	L	Q	K	Y	1	0	0	1	0	2	4	0	1	0	2	1	0	2	1	1	0	0	0	2	0	18	0	2144.04	A6QQ11	A6QQ11	602	619	yes	yes	3	2.1894e-05	112.02	matching	matching	matching	matching	matching	matching	matching	matching
ELDFVSHHVR	IKSGKLSRELDFVSHH	DFVSHHVRTKLDELKR	R	E	L	V	R	T	0	1	0	1	0	0	1	0	2	0	1	0	0	1	0	1	0	0	0	2	0	10	0	1237.62	Q0P569	Q0P569	85	94	yes	yes	2	3.7678e-11	139.43	matching	matching	matching	matching	matching	matching	MS/MS	matching
ELDINQDGGINFEEFLVLVIK	KDADTWFKELDINQDG	EFLVLVIKVGLEAHEE	K	E	L	I	K	V	0	0	2	2	0	1	3	2	0	3	3	1	0	2	0	0	0	0	0	2	0	21	0	2404.25	P28782	P28782	57	77	yes	yes	2;3	0	245.1	matching	matching	matching	MS/MS	MS/MS	MS/MS	MS/MS	matching
ELEDATETADAMNR	ASRRKLQRELEDATET	ETADAMNREVSSLKNK	R	E	L	N	R	E	3	1	1	2	0	0	3	0	0	0	1	0	1	0	0	0	2	0	0	0	0	14	0	1564.67	F1MQ37	F1MQ37	1898	1911	yes	yes	2	0.00045244	107.46	matching	matching	matching	matching	matching	matching	matching	matching
ELEELNVPGEIVESLSSSEESITR	________________	SSEESITRINKKIEKF	R	E	L	T	R	I	0	1	1	0	0	0	7	1	0	2	3	0	0	0	1	5	1	0	0	2	0	24	0	2645.29	CON__P02666;P02666	CON__P02666	2	25	yes	no	2;3	1.6215e-200	190.3	MS/MS	MS/MS	MS/MS	MS/MS	MS/MS	MS/MS	MS/MS	MS/MS
ELEENEVIPK	SGVPTEPKELEENEVI	EENEVIPKRSSPFDGD	K	E	L	P	K	R	0	0	1	0	0	0	4	0	0	1	1	1	0	0	1	0	0	0	0	1	0	10	0	1198.61	E1BKS1;G3MYP1	E1BKS1	106	115	yes	no	2	1.8066e-12	149.33	matching	MS/MS	MS/MS	MS/MS	matching	MS/MS	matching	MS/MS
ELEGILLPSDR	QLLGEFEKELEGILLP	GILLPSDRERLRAEVK	K	E	L	D	R	E	0	1	0	1	0	0	2	1	0	1	3	0	0	0	1	1	0	0	0	0	0	11	0	1240.67	F1MX65;Q3MHX6	F1MX65	439	449	yes	no	2	0.0088757	95.477	matching	matching	matching	matching	matching	matching	MS/MS	matching
ELENIIQETEK	EVKAGMERELENIIQE	NIIQETEKELDPDGLK	R	E	L	E	K	E	0	0	1	0	0	1	4	0	0	2	1	1	0	0	0	0	1	0	0	0	0	11	0	1344.68	F1MX65;Q3MHX6	F1MX65	463	473	yes	no	2	4.1678e-82	180.24	MS/MS	matching	matching	matching	matching	matching	matching	MS/MS
ELESQISELQEDLESER	NMALKKIRELESQISE	QEDLESERAARNKAEK	R	E	L	E	R	A	0	1	0	1	0	2	6	0	0	1	3	0	0	0	0	3	0	0	0	0	0	17	0	2032.94	F1MQ37	F1MQ37	1108	1124	yes	yes	2;3	0	226.22	matching	matching	matching	matching	matching	matching	matching	matching
ELEVAEGEGGKAELERLQAEAQQLR	AECQRKLKELEVAEGE	QAEAQQLRKEERSWEQ	K	E	L	L	R	K	4	2	0	0	0	3	7	3	0	0	4	1	0	0	0	0	0	0	0	1	0	25	2	2752.4	F1MHL1;Q5EAC6	F1MHL1	37	61	yes	no	3	0.0010811	57.484	matching	matching	matching	MS/MS	matching	MS/MS	matching	matching
ELFPEDSLK	SQTNGKIKELFPEDSL	LFPEDSLKSSTVLVLV	K	E	L	L	K	S	0	0	0	1	0	0	2	0	0	0	2	1	0	1	1	1	0	0	0	0	0	9	0	1076.54	A6QPZ4	A6QPZ4	109	117	yes	yes	2	0.0015668	115.71	matching	matching	matching	matching	MS/MS	matching	matching	matching
ELFTNTNK	NQWIGFMRELFTNTNK	ELFTNTNKFGIQFPFD	R	E	L	N	K	F	0	0	2	0	0	0	1	0	0	0	1	1	0	1	0	0	2	0	0	0	0	8	0	965.482	E1BK12	E1BK12	184	191	yes	yes	2	0.00016611	114.89	MS/MS	matching	matching	matching	matching	matching	matching	matching
ELGPQPLTHPLQQVGYAAPPSPPLSR	GFKASGQRELGPQPLT	PPSPPLSRALPQGHPR	R	E	L	S	R	A	2	1	0	0	0	3	1	2	1	0	4	0	0	0	7	2	1	0	1	1	0	26	0	2749.46	A5PJT7	A5PJT7	32	57	yes	yes	3	0.013409	40.177	matching	matching	matching	matching	matching	matching	matching	matching
ELISNASDALDK	SNKEIFLRELISNASD	NASDALDKIRYESLTD	R	E	L	D	K	I	2	0	1	2	0	0	1	0	0	1	2	1	0	0	0	2	0	0	0	0	0	12	0	1274.64	Q76LV1;G5E507;G3N2V5;Q95M18	Q76LV1	42	53	yes	no	2	2.0672e-26	152.38	matching	matching	matching	matching	matching	matching	matching	matching
ELKEAIRNNPGAK	MALRQEKRELKEAIRN	IRNNPGAKLKALEEAL	R	E	L	A	K	L	2	1	2	0	0	0	2	1	0	1	1	2	0	0	1	0	0	0	0	0	0	13	2	1438.79	A6QQV9	A6QQV9	644	656	yes	yes	2	7.2291e-24	127.17	matching	matching	matching	matching	matching	matching	matching	matching
ELLDSIDSLLTELR	GEDEGYFRELLDSIDS	DSLLTELR________	R	E	L	L	R	-	0	1	0	2	0	0	2	0	0	1	5	0	0	0	0	2	1	0	0	0	0	14	0	1615.87	Q32KV6	Q32KV6	449	462	yes	yes	2	1.692e-18	164.2	matching	matching	matching	matching	matching	MS/MS	matching	matching
ELLIDNEK	LVTTKGDKELLIDNEK	ELLIDNEKVTSGHTTT	K	E	L	E	K	V	0	0	1	1	0	0	2	0	0	1	2	1	0	0	0	0	0	0	0	0	0	8	0	972.513	P02672;CON__P02672;A5PJE3	P02672	435	442	yes	no	2	0.012079	86.136	matching	matching	matching	matching	matching	matching	matching	matching
ELLIDNEKVTSGHTTTTR	LVTTKGDKELLIDNEK	SGHTTTTRRSCSKVIT	K	E	L	T	R	R	0	1	1	1	0	0	2	1	1	1	2	1	0	0	0	1	5	0	0	1	0	18	1	2014.03	P02672;CON__P02672;A5PJE3	P02672	435	452	yes	no	3	0.0014861	85.976	matching	matching	matching	matching	matching	matching	matching	matching
ELLLQPVTISR	EVEVRSSKELLLQPVT	LQPVTISRNEKEKVLI	K	E	L	S	R	N	0	1	0	0	0	1	1	0	0	1	3	0	0	0	1	1	1	0	0	1	0	11	0	1267.75	Q148J6	Q148J6	45	55	yes	yes	2	0.0029544	113.38	matching	matching	matching	matching	matching	matching	matching	matching
ELNLDVSIQLPSR	QKDVPDHKELNLDVSI	VSIQLPSRNSAVRHRI	K	E	L	S	R	N	0	1	1	1	0	1	1	0	0	1	3	0	0	0	1	2	0	0	0	1	0	13	0	1482.8	Q2UVX4;CON__Q2UVX4;G3X7A5	Q2UVX4	1290	1302	yes	no	2	5.3957e-266	236.05	matching	MS/MS	matching	matching	MS/MS	matching	MS/MS	matching
ELPDPQESIQR	IPMGKLYKELPDPQES	DPQESIQRAAANFFSA	K	E	L	Q	R	A	0	1	0	1	0	2	2	0	0	1	1	0	0	0	2	1	0	0	0	0	0	11	0	1310.65	G3X6N3;CON__Q0IIK2;CON__Q29443;Q29443	G3X6N3	156	166	yes	no	2	6.2803e-70	182.92	MS/MS	matching	MS/MS	MS/MS	MS/MS	MS/MS	MS/MS	MS/MS
ELPNFLK	EFKQLVQKELPNFLKK	KELPNFLKKQKKNEAA	K	E	L	L	K	K	0	0	1	0	0	0	1	0	0	0	2	1	0	1	1	0	0	0	0	0	0	7	0	859.48	E1BLI9;F1MHS5;P28783	E1BLI9	44	50	no	no	2	1.1785e-06	110.63	matching	matching	matching	matching	matching	matching	matching	matching
ELQEMDKDDESLTK	PPPQKSLKELQEMDKD	KDDESLTKYKKTLLGD	K	E	L	T	K	Y	0	0	0	3	0	1	3	0	0	0	2	2	1	0	0	1	1	0	0	0	0	14	1	1679.76	Q9TU03	Q9TU03	33	46	yes	yes	2;3	0	287.42	matching	matching	matching	MS/MS	matching	MS/MS	matching	matching
ELQQAVLQMEQR	GRLEAQKRELQQAVLQ	AVLQMEQRKQQQQSHN	R	E	L	Q	R	K	1	1	0	0	0	4	2	0	0	0	2	0	1	0	0	0	0	0	0	1	0	12	0	1471.75	Q0P569	Q0P569	402	413	yes	yes	2	2.0512e-22	167.03	matching	matching	matching	matching	matching	matching	matching	matching
ELSDFISYLK	PKKYEGGRELSDFISY	SDFISYLKREATNPPV	R	E	L	L	K	R	0	0	0	1	0	0	1	0	0	1	2	1	0	1	0	2	0	0	1	0	0	10	0	1213.62	P38657;A5D7E8	P38657	472	481	yes	no	2	0.023178	83.862	matching	matching	matching	matching	matching	MS/MS	matching	matching
ELSGLPSGPSAGSGPPPPPPGPPPPPVPTSSGSDDSASR	SRTGPVAKELSGLPSG	GSDDSASRSALFAQIN	K	E	L	S	R	S	2	1	0	2	0	0	1	6	0	0	2	0	0	0	14	9	1	0	0	1	0	39	0	3585.72	A6QLB7;Q3SYV4	A6QLB7	215	253	no	no	3	1.2104e-15	65.577	matching	matching	matching	matching	matching	matching	matching	matching
ELSSFIQK	AKGPQLTRELSSFIQK	ELSSFIQKGQELCADY	R	E	L	Q	K	G	0	0	0	0	0	1	1	0	0	1	1	1	0	1	0	2	0	0	0	0	0	8	0	950.507	Q3MHN5;CON__Q3MHN5;F1N5M2	F1N5M2	394	401	no	no	2	3.2784e-08	134.81	matching	MS/MS	MS/MS	MS/MS	MS/MS	MS/MS	MS/MS	MS/MS
ELSYLPSLYDYSAYR	QLAESFWKELSYLPSL	LYDYSAYRRLIDQYGT	K	E	L	Y	R	R	1	1	0	1	0	0	1	0	0	0	3	0	0	0	1	3	0	0	4	0	0	15	0	1838.87	Q29RQ1;F1N045;CON__Q29RQ1	Q29RQ1	279	293	yes	no	2	0.0009738	101.53	matching	matching	matching	matching	matching	matching	matching	matching
ELTLEDLEVTGPTPPTPLEAAGPALTTLSLR	ALGYSRLKELTLEDLE	ALTTLSLRNVSWTTGG	K	E	L	L	R	N	3	1	0	1	0	0	4	2	0	0	7	0	0	0	5	1	6	0	0	1	0	31	0	3201.7	Q95122;A6QNL0	Q95122	119	149	yes	no	3	2.2478e-30	130.48	matching	matching	matching	matching	MS/MS	MS/MS	MS/MS	matching
EMDKMIEDLELSNKR	MAQEEIRKEMDKMIED	DLELSNKRHSLVQTLS	K	E	M	K	R	H	0	1	1	2	0	0	3	0	0	1	2	2	2	0	0	1	0	0	0	0	0	15	2	1849.89	G3N055;G3MWN6	G3N055	1069	1083	yes	no	2	0.039706	60.937	matching	matching	matching	matching	matching	matching	matching	matching
EMEENFSVEAANYQDTIGR	ESLERQMREMEENFSV	NYQDTIGRLQDEIQNM	R	E	M	G	R	L	2	1	2	1	0	1	4	1	0	1	0	0	1	1	0	1	1	0	1	1	0	19	0	2201.95	P48616	P48616	346	364	yes	yes	2	0	241.98	matching	MS/MS	matching	matching	matching	MS/MS	matching	matching
EMNDAAMFYTNR	PKPGPYVKEMNDAAMF	AAMFYTNRVLKEYKDV	K	E	M	N	R	V	2	1	2	1	0	0	1	0	0	0	0	0	2	1	0	0	1	0	1	0	0	12	0	1461.6	A6QLB7;Q3SYV4	A6QLB7	155	166	no	no	2	6.788e-12	141.34	matching	matching	matching	matching	matching	MS/MS	matching	matching
EMSNINHPDIR	LLLLNPLKEMSNINHP	NINHPDIRLKQLECVL	K	E	M	I	R	L	0	1	2	1	0	0	1	0	1	2	0	0	1	0	1	1	0	0	0	0	0	11	0	1324.62	E1BPI7	E1BPI7	874	884	yes	yes	2;3	0.003681	98.048	matching	matching	matching	matching	matching	matching	matching	matching
EMYTLGITNFPIPGEPGFPLNAIYAK	NSKSQGEKEMYTLGIT	PLNAIYAKPANKQEDE	K	E	M	A	K	P	2	0	2	0	0	0	2	3	0	3	2	1	1	2	4	0	2	0	2	0	0	26	0	2852.45	Q3T035	Q3T035	94	119	yes	yes	3	0.0051873	45.243	matching	matching	matching	matching	matching	matching	matching	matching
ENEAQAAAETPEVK	TEEEGTPKENEAQAAA	AAETPEVKEGKEEKPE	K	E	N	V	K	E	4	0	1	0	0	1	4	0	0	0	0	1	0	0	1	0	1	0	0	1	0	14	0	1485.69	P80724	P80724	39	52	yes	yes	2	0	235.93	matching	matching	matching	matching	MS/MS	MS/MS	matching	matching
ENEVEEWQLR	LEEARRRKENEVEEWQ	EVEEWQLRAKEAQDDL	K	E	N	L	R	A	0	1	1	0	0	1	4	0	0	0	1	0	0	0	0	0	0	1	0	1	0	10	0	1330.62	P31976	P31976	439	448	yes	yes	2	1.7026e-44	183.85	matching	matching	matching	matching	matching	MS/MS	matching	matching
ENFINFAK	KELTPEVRENFINFAK	ENFINFAKSLGLTDDH	R	E	N	A	K	S	1	0	2	0	0	0	1	0	0	1	0	1	0	2	0	0	0	0	0	0	0	8	0	981.492	E1B6Z6	E1B6Z6	171	178	yes	yes	1;2	2.3429e-44	167.23	matching	MS/MS	MS/MS	MS/MS	MS/MS	MS/MS	matching	MS/MS
ENFQNWLK	VGRPQPGRENFQNWLK	ENFQNWLKDGTVLCEL	R	E	N	L	K	D	0	0	2	0	0	1	1	0	0	0	1	1	0	1	0	0	0	1	0	0	0	8	0	1077.52	Q5E9F5	Q5E9F5	50	57	yes	yes	2	2.6016e-08	128.61	matching	matching	matching	matching	matching	matching	matching	matching
ENPSVIDFALAPITDLVR	SDWLESVKENPSVIDF	APITDLVRNIPCAVTR	K	E	N	V	R	N	2	1	1	2	0	0	1	0	0	2	2	0	0	1	2	1	1	0	0	2	0	18	0	1969.05	Q29RU4;F1MM86	Q29RU4	478	495	yes	no	2;3	2.4904e-65	156.08	matching	matching	matching	matching	matching	MS/MS	matching	matching
ENQGGIISEVQESNHETLDK	GLDSKEVRENQGGIIS	SNHETLDKLLIQQVIQ	R	E	N	D	K	L	0	0	2	1	0	2	4	2	1	2	1	1	0	0	0	2	1	0	0	1	0	20	0	2226.04	F1N6H4	F1N6H4	2864	2883	yes	yes	3	0.040831	56.25	matching	matching	matching	matching	matching	MS/MS	matching	matching
ENSDFAPFR	KALEKYQRENSDFAPF	NSDFAPFRVDKVKRAM	R	E	N	F	R	V	1	1	1	1	0	0	1	0	0	0	0	0	0	2	1	1	0	0	0	0	0	9	0	1081.48	F1MKS5	F1MKS5	171	179	yes	yes	2	0.0025371	117.53	matching	matching	matching	matching	matching	matching	matching	matching
EPEHPASFYEVLYFQDPQA	IMTVKYIREPEHPASF	LYFQDPQA________	R	E	P	Q	A	-	2	0	0	1	0	2	3	0	1	0	1	0	0	2	3	1	0	0	2	1	0	19	0	2266.02	P29392	P29392	116	134	yes	yes	2;3	2.6078e-50	161.19	MS/MS	MS/MS	MS/MS	matching	matching	matching	MS/MS	matching
EPGLQIWR	PEFLKAGKEPGLQIWR	EPGLQIWRVEKFDLVP	K	E	P	W	R	V	0	1	0	0	0	1	1	1	0	1	1	0	0	0	1	0	0	1	0	0	0	8	0	997.535	F1N1I6;CON__Q3SX14;Q3SX14;F1MJH1	F1N1I6	64	71	yes	no	2	0.026985	73.26	matching	matching	matching	matching	matching	matching	matching	matching
EPGQDLVVLPLTITSDFIPSFR	LKVGRQYREPGQDLVV	SDFIPSFRLVAYYTLI	R	E	P	F	R	L	0	1	0	2	0	1	1	1	0	2	3	0	0	2	3	2	2	0	0	2	0	22	0	2443.3	Q2UVX4;CON__Q2UVX4;G3X7A5	Q2UVX4	507	528	yes	no	2;3	5.9299e-182	185.92	MS/MS	MS/MS	MS/MS	MS/MS	MS/MS	MS/MS	MS/MS	MS/MS
EPISDILKLK	LSFYQERKEPISDILK	ISDILKLKTHLPTFNQ	K	E	P	L	K	T	0	0	0	1	0	0	1	0	0	2	2	2	0	0	1	1	0	0	0	0	0	10	1	1154.69	F1MNS5	F1MNS5	905	914	yes	yes	2	0.0067075	72.243	matching	matching	matching	matching	matching	matching	matching	matching
EPMIGVNQELAYFYPELFR	EGIHAQQKEPMIGVNQ	YFYPELFRQFYQLDAY	K	E	P	F	R	Q	1	1	1	0	0	1	3	1	0	1	2	0	1	2	2	0	0	0	2	1	0	19	0	2315.13	CON__P02662;P02662	CON__P02662	133	151	yes	no	2;3	2.2034e-209	202.81	MS/MS	MS/MS	MS/MS	MS/MS	MS/MS	MS/MS	MS/MS	MS/MS
EPQVYVLAPPQEELSK	SRTKGPAREPQVYVLA	PPQEELSKSTVSLTCM	R	E	P	S	K	S	1	0	0	0	0	2	3	0	0	0	2	1	0	0	3	1	0	0	1	2	0	16	0	1825.95	CON__ENSEMBL:ENSBTAP00000024462;CON__ENSEMBL:ENSBTAP00000024466	CON__ENSEMBL:ENSBTAP00000024462	315	330	yes	no	2;3	2.4916e-63	177.07	MS/MS	MS/MS	MS/MS	MS/MS	MS/MS	MS/MS	MS/MS	MS/MS
EPQVYVLDPPK	PVPTGPAREPQVYVLD	VYVLDPPKEELSKSTL	R	E	P	P	K	E	0	0	0	1	0	1	1	0	0	0	1	1	0	0	3	0	0	0	1	2	0	11	0	1283.68	CON__ENSEMBL:ENSBTAP00000024462;G3N0V0	CON__ENSEMBL:ENSBTAP00000024462	104	114	no	no	2	0.00099022	122.55	matching	MS/MS	matching	matching	matching	MS/MS	matching	matching
EPQVYVLDPPKEELSK	PVPTGPAREPQVYVLD	PPKEELSKSTLSVTCM	R	E	P	S	K	S	0	0	0	1	0	1	3	0	0	0	2	2	0	0	3	1	0	0	1	2	0	16	1	1869.97	CON__ENSEMBL:ENSBTAP00000024462;G3N0V0	CON__ENSEMBL:ENSBTAP00000024462	104	119	no	no	2;3	0	244.18	MS/MS	MS/MS	MS/MS	MS/MS	MS/MS	MS/MS	MS/MS	MS/MS
EPSQADIALLK	IPVSRLFREPSQADIA	QADIALLKLSRPAIIT	R	E	P	L	K	L	2	0	0	1	0	1	1	0	0	1	2	1	0	0	1	1	0	0	0	0	0	11	0	1183.64	P06868;E1B726;CON__P06868;A7E350	P06868	662	672	yes	no	2	0.010763	96.229	matching	matching	matching	matching	matching	matching	matching	matching
EPSVFIFPPK	CHNQPCVREPSVFIFP	SVFIFPPKPKDTLMIT	R	E	P	P	K	P	0	0	0	0	0	0	1	0	0	1	0	1	0	2	3	1	0	0	0	1	0	10	0	1159.63	G3N0V0	G3N0V0	114	123	yes	yes	2	0.034564	78.939	matching	matching	matching	matching	matching	matching	matching	matching
EPSVFIFPPKPK	CHNQPCVREPSVFIFP	FIFPPKPKDTLMITGT	R	E	P	P	K	D	0	0	0	0	0	0	1	0	0	1	0	2	0	2	4	1	0	0	0	1	0	12	1	1384.78	G3N0V0	G3N0V0	114	125	yes	yes	2;3	3.5969e-75	178.53	matching	MS/MS	matching	MS/MS	MS/MS	MS/MS	matching	matching
EPYFGYSGAFK	NQCACSSREPYFGYSG	FGYSGAFKCLQDGAGD	R	E	P	F	K	C	1	0	0	0	0	0	1	2	0	0	0	1	0	2	1	1	0	0	2	0	0	11	0	1264.58	P24627;CON__Q2HJF0	P24627	206	216	no	no	2	0.0031957	110.84	matching	matching	MS/MS	matching	matching	MS/MS	MS/MS	matching
EQDLQLEELKQQISTLK	THYKNMIREQDLQLEE	KQQISTLKCQNEQLQT	R	E	Q	L	K	C	0	0	0	1	0	4	3	0	0	1	4	2	0	0	0	1	1	0	0	0	0	17	1	2042.09	P41541	P41541	661	677	yes	yes	2	0.042092	41.088	matching	matching	matching	matching	matching	matching	matching	matching
EQINAVTSFLDASLVYGSEPSLASR	PPYQSLAREQINAVTS	SEPSLASRLRNLSSPL	R	E	Q	S	R	L	3	1	1	1	0	1	2	1	0	1	3	0	0	1	1	5	1	0	1	2	0	25	0	2653.32	P80025;G3MXZ0	P80025	295	319	yes	no	2;3	0	225.98	MS/MS	MS/MS	MS/MS	MS/MS	MS/MS	MS/MS	MS/MS	MS/MS
EQLGPVTQEFWDNLEK	ASTLSKVREQLGPVTQ	EFWDNLEKETASLRQE	R	E	Q	E	K	E	0	0	1	1	0	2	3	1	0	0	2	1	0	1	1	0	1	1	0	1	0	16	0	1931.93	P15497;CON__P15497	P15497	85	100	yes	no	2;3	0	276.14	MS/MS	MS/MS	MS/MS	MS/MS	matching	MS/MS	MS/MS	MS/MS
EQLGPVTQEFWDNLEKETASLR	ASTLSKVREQLGPVTQ	EKETASLRQEMHKDLE	R	E	Q	L	R	Q	1	1	1	1	0	2	4	1	0	0	3	1	0	1	1	1	2	1	0	1	0	22	1	2589.27	P15497;CON__P15497	P15497	85	106	yes	no	3	0.00037617	88.282	matching	matching	matching	matching	matching	MS/MS	matching	matching
EQLQDMGLEDLFSPEK	IEDSFSVKEQLQDMGL	EDLFSPEKSRLPGIVA	K	E	Q	E	K	S	0	0	0	2	0	2	3	1	0	0	3	1	1	1	1	1	0	0	0	0	0	16	0	1877.87	P41361;F1MSZ6;CON__P41361	P41361	366	381	yes	no	2	4.2254e-286	216.71	matching	MS/MS	MS/MS	MS/MS	MS/MS	matching	MS/MS	matching
EQQKVLHETIK	FTKNQQLREQQKVLHE	KVLHETIKVLEDRLRA	R	E	Q	I	K	V	0	0	0	0	0	2	2	0	1	1	1	2	0	0	0	0	1	0	0	1	0	11	1	1351.75	A6QNQ6	A6QNQ6	68	78	yes	yes	2	0.033067	59.84	matching	matching	matching	matching	matching	matching	matching	matching
EQSHVMDVMEDSFTR	DSLMENDREQSHVMDV	VMEDSFTRASSIMDEL	R	E	Q	T	R	A	0	1	0	2	0	1	2	0	1	0	0	0	2	1	0	2	1	0	0	2	0	15	0	1809.77	P17697;CON__P17697	P17697	162	176	yes	no	2;3	5.9089e-45	168.93	MS/MS	MS/MS	matching	matching	matching	MS/MS	MS/MS	MS/MS
EQSLERALDLAESVIESAQQRPPK	________________	SAQQRPPKRKNSSGEM	M	E	Q	P	K	R	3	2	0	1	0	3	4	0	0	1	3	1	0	0	2	3	0	0	0	1	0	24	2	2693.4	E1BGX3;E1BJ71	E1BGX3	2	25	yes	no	2;3	0.00035399	81.574	matching	MS/MS	matching	MS/MS	matching	matching	MS/MS	MS/MS
EQSPDVLLAQIR	LVVAGKLREQSPDVLL	DVLLAQIRGQLHRENI	R	E	Q	I	R	G	1	1	0	1	0	2	1	0	0	1	2	0	0	0	1	1	0	0	0	1	0	12	0	1367.74	F1MMD7;Q3T052;CON__Q3T052	F1MMD7	500	511	yes	no	2	0	255.41	matching	MS/MS	matching	matching	MS/MS	matching	matching	MS/MS
EQSVQEIPVSR	GAHNEKVREQSVQEIP	VQEIPVSRLFREPSQA	R	E	Q	S	R	L	0	1	0	0	0	2	2	0	0	1	0	0	0	0	1	2	0	0	0	2	0	11	0	1270.65	P06868;E1B726;CON__P06868;A7E350	P06868	648	658	yes	no	2	3.7991e-05	153.75	matching	matching	matching	matching	matching	MS/MS	matching	matching
EQVANSAFVER	YYITGESKEQVANSAF	ANSAFVERVRKRGFEV	K	E	Q	E	R	V	2	1	1	0	0	1	2	0	0	0	0	0	0	1	0	1	0	0	0	2	0	11	0	1248.61	Q76LV1;G5E507;G3N2V5	Q76LV1	492	502	yes	no	2	0.038969	72.34	matching	matching	matching	matching	matching	matching	matching	matching
EREEETPAYQGPGIPELLSPMK	AGAIHFQREREEETPA	PELLSPMKDAPCLLKT	R	E	R	M	K	D	1	1	0	0	0	1	5	2	0	1	2	1	1	0	4	1	1	0	1	0	0	22	1	2470.2	F1MX65;Q3MHX6	F1MX65	85	106	yes	no	3	2.6367e-14	120.56	matching	matching	matching	matching	matching	matching	matching	matching
ESGLYFIR	DVANKGAKESGLYFIR	ESGLYFIRPLKAKQQF	K	E	S	I	R	P	0	1	0	0	0	0	1	1	0	1	1	0	0	1	0	1	0	0	1	0	0	8	0	983.508	Q3SZZ9;F1MGU7;P12799	Q3SZZ9	187	194	yes	no	2	6.1064e-12	153.04	matching	matching	matching	matching	MS/MS	MS/MS	matching	matching
ESGLYFIRPLK	DVANKGAKESGLYFIR	LYFIRPLKAKQQFLVY	K	E	S	L	K	A	0	1	0	0	0	0	1	1	0	1	2	1	0	1	1	1	0	0	1	0	0	11	1	1321.74	Q3SZZ9;F1MGU7;P12799	Q3SZZ9	187	197	yes	no	2	2.1187e-33	173.24	matching	matching	matching	matching	matching	matching	matching	matching
ESHDFDLVDALL	VNPTVEMKESHDFDLV	FDLVDALL________	K	E	S	L	L	-	1	0	0	3	0	0	1	0	1	0	3	0	0	1	0	1	0	0	0	1	0	12	0	1372.65	P01045;CON__P01045-1;P01044;CON__P01044-1;CON__Q2KJ62	CON__Q2KJ62	610	621	no	no	2	0.0032431	110.38	matching	matching	matching	matching	matching	matching	matching	matching
ESLEIIDGLPGSPVLGK	YLQLNCNKESLEIIDG	PGSPVLGKICEGSLMD	K	E	S	G	K	I	0	0	0	1	0	0	2	3	0	2	3	1	0	0	2	2	0	0	0	1	0	17	0	1722.94	P29392;G8JKX0	P29392	77	93	yes	no	2	6.3164e-53	165.34	matching	MS/MS	MS/MS	MS/MS	matching	matching	matching	MS/MS
ESLLEEFR	YGREPQLRESLLEEFR	ESLLEEFREVALGVGI	R	E	S	F	R	E	0	1	0	0	0	0	3	0	0	0	2	0	0	1	0	1	0	0	0	0	0	8	0	1021.51	P00978;F1MMK9;CON__P00978	P00978	159	166	yes	no	2	3.5185e-13	138.4	matching	MS/MS	matching	matching	MS/MS	matching	matching	matching
ESPQTHYYAVAVVK	AAEIYGTKESPQTHYY	YYAVAVVKKGSNFQLD	K	E	S	V	K	K	2	0	0	0	0	1	1	0	1	0	0	1	0	0	1	1	1	0	2	3	0	14	0	1590.8	P24627	P24627	105	118	yes	yes	2;3	0	256.13	MS/MS	MS/MS	MS/MS	MS/MS	MS/MS	MS/MS	MS/MS	MS/MS
ESPQTHYYAVAVVKK	AAEIYGTKESPQTHYY	YAVAVVKKGSNFQLDQ	K	E	S	K	K	G	2	0	0	0	0	1	1	0	1	0	0	2	0	0	1	1	1	0	2	3	0	15	1	1718.9	P24627	P24627	105	119	yes	yes	3	8.5194e-05	109.6	matching	matching	matching	matching	matching	MS/MS	matching	matching
ESQAPALPAQEEMPVPLGG	FFNTLKEKESQAPALP	EMPVPLGG________	K	E	S	G	G	-	3	0	0	0	0	2	3	2	0	0	2	0	1	0	4	1	0	0	0	1	0	19	0	1919.93	Q32PJ2;F1N3Q7;CON__Q32PJ2	Q32PJ2	362	380	yes	no	2	0.0021578	83.792	matching	matching	matching	matching	matching	matching	matching	matching
ESTLHLVLR	LSDYNIQKESTLHLVL	STLHLVLRLRGGIIEP	K	E	S	L	R	L	0	1	0	0	0	0	1	0	1	0	3	0	0	0	0	1	1	0	0	1	0	9	0	1066.61	P63048;P62992;P0CG53;E1B9K1;P0CH28	P63048	64	72	yes	no	2	0.0044733	107.69	matching	matching	matching	matching	matching	matching	matching	matching
ESYAGVTLDPQGVYGIISR	VVPEGVKRESYAGVTL	GVYGIISRRKEFPYRI	R	E	S	S	R	R	1	1	0	1	0	1	1	3	0	2	1	0	0	0	1	2	1	0	2	2	0	19	0	2024.02	F1MY85;CON__Q1A7A4	F1MY85	937	955	no	no	2	0.00018787	97.271	matching	matching	matching	matching	matching	matching	matching	matching
ETADTDTADQVMASFK	AFIDFMSRETADTDTA	DQVMASFKILAGDKNY	R	E	T	F	K	I	3	0	0	3	0	1	1	0	0	0	0	1	1	1	0	1	3	0	0	1	0	16	0	1728.75	Q3B7N2	Q3B7N2	819	834	yes	yes	2	5.7749e-286	217.32	matching	matching	matching	matching	matching	matching	matching	matching
ETDLLLDDSLLFLFGNHR	DPSGTFGKETDLLLDD	LFLFGNHRLKRFSMVI	K	E	T	H	R	L	0	1	1	3	0	0	1	1	1	0	6	0	0	2	0	1	1	0	0	0	0	18	0	2117.08	Q9BGI1	Q9BGI1	165	182	yes	yes	3	0.0031609	73.758	matching	matching	matching	matching	matching	MS/MS	matching	matching
ETDMHESDKEQPDDK	RKVPECIKETDMHESD	DKEQPDDKSAITEESI	K	E	T	D	K	S	0	0	0	4	0	1	3	0	1	0	0	2	1	0	1	1	1	0	0	0	0	15	1	1802.73	E1BAG3	E1BAG3	769	783	yes	yes	2;3	0.022416	71.513	matching	matching	matching	matching	matching	matching	matching	matching
ETEEGDTEPEEDAPPKEEK	LTEDVEPKETEEGDTE	DAPPKEEKEMVGPASR	K	E	T	E	K	E	1	0	0	2	0	0	8	1	0	0	0	2	0	0	3	0	2	0	0	0	0	19	1	2157.91	A6QQ20	A6QQ20	200	218	yes	yes	3	0.023201	60.949	matching	matching	matching	matching	matching	matching	matching	matching
ETEILSGSWTEQTYQEGTQATYK	CKEPPPRKETEILSGS	EGTQATYKCRPGYRTL	K	E	T	Y	K	C	1	0	0	0	0	3	4	2	0	1	1	1	0	0	0	2	5	1	2	0	0	23	0	2649.21	Q28085;CON__Q28085	Q28085	29	51	yes	no	2;3	1.724e-160	178.22	matching	matching	matching	matching	matching	MS/MS	matching	matching
ETIELVHTEPTDVAQLPSR	QLKLDLERETIELVHT	DVAQLPSRVPRDAARY	R	E	T	S	R	V	1	1	0	1	0	1	3	0	1	1	2	0	0	0	2	1	3	0	0	2	0	19	0	2134.09	A2VDX0;F1MG94	A2VDX0	210	228	yes	no	3	0.00012868	88.637	matching	matching	matching	matching	matching	matching	matching	matching
ETIQGITDPLFK	AKVISNARETIQGITD	GITDPLFKGMTRDQVR	R	E	T	F	K	G	0	0	0	1	0	1	1	1	0	2	1	1	0	1	1	0	2	0	0	0	0	12	0	1360.72	F1MMW8;Q8SQ28;F1MHZ0	Q8SQ28	81	92	no	no	2	2.0696e-227	215.02	matching	MS/MS	MS/MS	MS/MS	MS/MS	MS/MS	matching	MS/MS
ETIQGITDPLFKGMTR	AKVISNARETIQGITD	PLFKGMTRDQVREDSK	R	E	T	T	R	D	0	1	0	1	0	1	1	2	0	2	1	1	1	1	1	0	3	0	0	0	0	16	1	1805.93	F1MMW8;Q8SQ28;F1MHZ0	Q8SQ28	81	96	no	no	2;3	0.0059927	99.915	matching	matching	matching	matching	matching	MS/MS	matching	matching
ETLYSVMPGLK	RNTAYKWKETLYSVMP	YSVMPGLKVTMDKEGL	K	E	T	L	K	V	0	0	0	0	0	0	1	1	0	0	2	1	1	0	1	1	1	0	1	1	0	11	0	1236.64	F1MMD7;Q3T052;CON__Q3T052	F1MMD7	802	812	yes	no	2	1.9652e-24	155.53	matching	matching	matching	matching	MS/MS	MS/MS	matching	matching
ETMLSDGLNSLTYMVLEVQR	FDRIAHTKETMLSDGL	YMVLEVQRYPLYTKIT	K	E	T	Q	R	Y	0	1	1	1	0	1	2	1	0	0	4	0	2	0	0	2	2	0	1	2	0	20	0	2298.12	P08037	P08037	368	387	yes	yes	2;3	0	250.38	MS/MS	MS/MS	matching	matching	matching	MS/MS	MS/MS	matching
ETNLDSLPLVDTHSK	NFSSLNLRETNLDSLP	PLVDTHSKRTLLIKTV	R	E	T	S	K	R	0	0	1	2	0	0	1	0	1	0	3	1	0	0	1	2	2	0	0	1	0	15	0	1667.84	P48616	P48616	425	439	yes	yes	2	0.0011712	119.65	matching	matching	matching	matching	matching	matching	matching	matching
ETQGSGPLPGTVTVTSR	SPLDGEAKETQGSGPL	GTVTVTSRYTVTPLSE	K	E	T	S	R	Y	0	1	0	0	0	1	1	3	0	0	1	0	0	0	2	2	4	0	0	2	0	17	0	1685.86	Q17QC7	Q17QC7	209	225	yes	yes	2	0.00041139	110.26	matching	matching	matching	matching	matching	matching	MS/MS	matching
ETQSIIFLGK	FLLSIFCKETQSIIFL	QSIIFLGKVTNPKEA_	K	E	T	G	K	V	0	0	0	0	0	1	1	1	0	2	1	1	0	1	0	1	1	0	0	0	0	10	0	1134.63	A0A0A0MPA0;CON__REFSEQ:XP_001252647;A0A0A0MP92;CON__ENSEMBL:ENSBTAP00000038329	A0A0A0MPA0	401	410	no	no	2	8.402e-246	217.66	matching	MS/MS	MS/MS	MS/MS	MS/MS	matching	matching	MS/MS
ETTDTDTADQVIASFK	AFIDFMSRETTDTDTA	DQVIASFKVLAGDKNF	R	E	T	F	K	V	2	0	0	3	0	1	1	0	0	1	0	1	0	1	0	1	4	0	0	1	0	16	0	1740.81	A5D7D1	A5D7D1	838	853	yes	yes	2	4.7223e-254	209.23	matching	matching	matching	matching	matching	matching	matching	matching
ETTVFENLPEK	AGDVAFVKETTVFENL	VFENLPEKADRDQYEL	K	E	T	E	K	A	0	0	1	0	0	0	3	0	0	0	1	1	0	1	1	0	2	0	0	1	0	11	0	1305.65	P24627	P24627	230	240	yes	yes	2	1.195e-191	214.04	matching	MS/MS	matching	MS/MS	MS/MS	matching	MS/MS	MS/MS
ETTVFENLPEKADR	AGDVAFVKETTVFENL	NLPEKADRDQYELLCL	K	E	T	D	R	D	1	1	1	1	0	0	3	0	0	0	1	1	0	1	1	0	2	0	0	1	0	14	1	1647.81	P24627	P24627	230	243	yes	yes	2	8.6945e-37	156.08	matching	matching	matching	matching	matching	MS/MS	matching	matching
ETVLKSNTMVYNGMNMEAIHVLLNFMEK	PSDKTAEKETVLKSNT	VLLNFMEKRIDKGSSY	K	E	T	E	K	R	1	0	4	0	0	0	3	1	1	1	3	2	4	1	0	1	2	0	1	3	0	28	1	3255.58	E1BD35	E1BD35	324	351	yes	yes	3	0.024587	40.986	matching	matching	matching	matching	matching	matching	matching	matching
ETWTTSVAEVQPSVLQVVNLPLVER	VTGWGNRRETWTTSVA	VNLPLVERPVCKASTR	R	E	T	E	R	P	1	1	1	0	0	2	3	0	0	0	3	0	0	0	2	2	3	1	0	6	0	25	0	2793.49	P00735;CON__P00735	P00735	512	536	yes	no	3	0.029056	35.187	matching	matching	matching	matching	matching	matching	matching	matching
EVALGVGIPEDAIFTMPDR	ESLLEEFREVALGVGI	AIFTMPDRGECVPGEQ	R	E	V	D	R	G	2	1	0	2	0	0	2	2	0	2	1	0	1	1	2	0	1	0	0	2	0	19	0	2029.02	P00978;F1MMK9;CON__P00978	P00978	167	185	yes	no	2	5.9391e-05	107.15	matching	matching	matching	MS/MS	matching	matching	matching	matching
EVALNTIIFMGR	RPILVLIREVALNTII	NTIIFMGRVANPCVD_	R	E	V	G	R	V	1	1	1	0	0	0	1	1	0	2	1	0	1	1	0	0	1	0	0	1	0	12	0	1362.73	P41361;F1MSZ6;CON__P41361	P41361	447	458	yes	no	2	0	228.78	matching	MS/MS	MS/MS	matching	MS/MS	MS/MS	matching	MS/MS
EVDEQMLNVQNK	FRGRMSMKEVDEQMLN	QMLNVQNKNSSYFVEW	K	E	V	N	K	N	0	0	2	1	0	2	2	0	0	0	1	1	1	0	0	0	0	0	0	2	0	12	0	1445.68	Q2KJD0;Q6B856;Q3MHM5;E1BJB1;E1B953	Q2KJD0	325	336	yes	no	2	0.013562	90.913	matching	matching	matching	matching	matching	matching	matching	matching
EVDLYLPR	SPQNMRKREVDLYLPR	EVDLYLPRFKVEESYD	R	E	V	P	R	F	0	1	0	1	0	0	1	0	0	0	2	0	0	0	1	0	0	0	1	1	0	8	0	1003.53	F1MMS7;A6QPZ4;G5E537	A6QPZ4	227	234	no	no	2	3.3162e-44	161.02	matching	matching	matching	matching	matching	matching	matching	matching
EVEVSIPASFFPR	NLLLGQEKEVEVSIPA	IPASFFPRLTPWMVAV	K	E	V	P	R	L	1	1	0	0	0	0	2	0	0	1	0	0	0	2	2	2	0	0	0	2	0	13	0	1476.76	P18892	P18892	230	242	yes	yes	2	0.0050705	117.2	matching	MS/MS	matching	matching	matching	matching	matching	MS/MS
EVFAPSSIFQDNFLIPDISAPGTWK	QGFRVRKREVFAPSSI	ISAPGTWKISARFSDS	R	E	V	W	K	I	2	0	1	2	0	1	1	1	0	3	1	1	0	3	3	3	1	1	0	1	0	25	0	2778.39	CON__ENSEMBL:ENSBTAP00000007350	CON__ENSEMBL:ENSBTAP00000007350	190	214	yes	yes	3	1.7009e-05	85.881	matching	matching	matching	matching	matching	MS/MS	matching	matching
EVFGDTLNESR	CGKTSLAKEVFGDTLN	GDTLNESRDPDRPPER	K	E	V	S	R	D	0	1	1	1	0	0	2	1	0	0	1	0	0	1	0	1	1	0	0	1	0	11	0	1265.59	G3N3D4;G3MWZ7	G3N3D4	248	258	yes	no	2	0.05367	64.121	matching	matching	matching	matching	matching	matching	matching	matching
EVQGFESATFLGYFK	NGRAVQHREVQGFESA	ATFLGYFKSGLKYKKG	R	E	V	F	K	S	1	0	0	0	0	1	2	2	0	0	1	1	0	3	0	1	1	0	1	1	0	15	0	1721.83	F1N1I6;CON__Q3SX14;Q3SX14;F1MJH1	F1N1I6	147	161	yes	no	2	0	276.1	matching	MS/MS	matching	matching	MS/MS	MS/MS	matching	matching
EVSFNVEIPK	VNSADTAKEVSFNVEI	SFNVEIPKTAFISDFA	K	E	V	P	K	T	0	0	1	0	0	0	2	0	0	1	0	1	0	1	1	1	0	0	0	2	0	10	0	1160.61	Q0VCM5;F1MMP5;CON__Q0VCM5	Q0VCM5	79	88	yes	no	2	2.4255e-05	142	matching	matching	matching	matching	MS/MS	matching	matching	matching
EVTLDLSQHQGIAVR	KEGSYLGREVTLDLSQ	QHQGIAVRRVLNTERD	R	E	V	V	R	R	1	1	0	1	0	2	1	1	1	1	2	0	0	0	0	1	1	0	0	2	0	15	0	1664.88	F1MM32	F1MM32	203	217	yes	yes	2;3	0	286.88	matching	matching	matching	matching	MS/MS	MS/MS	matching	matching
EVTLEDRLDK	CFMHHTEKEVTLEDRL	TLEDRLDKACEPGVDY	K	E	V	D	K	A	0	1	0	2	0	0	2	0	0	0	2	1	0	0	0	0	1	0	0	1	0	10	1	1216.63	Q2UVX4;CON__Q2UVX4;G3X7A5	Q2UVX4	1524	1533	yes	no	2;3	4.4338e-56	166.86	matching	MS/MS	matching	matching	matching	matching	matching	matching
EVTSESGSIVVSGLTPGVEYVYTISVLR	SQGGEAPREVTSESGS	VYTISVLRDGQERDAP	R	E	V	L	R	D	0	1	0	0	0	0	3	3	0	2	2	0	0	0	1	5	3	0	2	6	0	28	0	2940.53	B8Y9S9;P07589;G5E5A9;B8Y9T0	B8Y9S9	1131	1158	yes	no	3	0.025217	36.049	matching	matching	matching	matching	matching	matching	matching	matching
EVVADSVWVDVK	LINAKGQREVVADSVW	DSVWVDVKDSCMGTLV	R	E	V	V	K	D	1	0	0	2	0	0	1	0	0	0	0	1	0	0	0	1	0	1	0	5	0	12	0	1344.69	Q2UVX4;CON__Q2UVX4;G3X7A5	Q2UVX4	543	554	yes	no	2	1.1029e-157	215.77	matching	matching	matching	matching	matching	MS/MS	matching	matching
EVVLEEGTIAFK	LIEKTIKKEVVLEEGT	EEGTIAFKNWVKTGTD	K	E	V	F	K	N	1	0	0	0	0	0	3	1	0	1	1	1	0	1	0	0	1	0	0	2	0	12	0	1333.71	P26201	P26201	41	52	yes	yes	2	1.0415e-59	176.32	matching	MS/MS	matching	matching	matching	matching	matching	MS/MS
EVWEEADGLDPNDFDPK	PGSKDQLKEVWEEADG	DPNDFDPKTFFKLHDV	K	E	V	P	K	T	1	0	1	4	0	0	3	1	0	0	1	1	0	1	2	0	0	1	0	1	0	17	0	1974.85	Q0IIH5	Q0IIH5	231	247	yes	yes	2	8.5165e-16	144.3	matching	matching	matching	matching	matching	matching	matching	matching
EVWEELDGLDPNR	PGSQAQLKEVWEELDG	LDGLDPNRFNPKTFFI	K	E	V	N	R	F	0	1	1	2	0	0	3	1	0	0	2	0	0	0	1	0	0	1	0	1	0	13	0	1570.73	Q0P569	Q0P569	227	239	yes	yes	2	1.852e-26	161.87	matching	matching	matching	matching	matching	MS/MS	matching	matching
EVWYFGLQYVDNK	VVKTIGLREVWYFGLQ	GLQYVDNKGFPTWLKL	R	E	V	N	K	G	0	0	1	1	0	1	1	1	0	0	1	1	0	1	0	0	0	1	2	2	0	13	0	1659.79	P31976	P31976	41	53	yes	yes	2	2.4023e-49	161.21	matching	matching	matching	matching	matching	MS/MS	matching	matching
EWTRPESLDLLEVR	QLTLEKLREWTRPESL	SLDLLEVRVQLPRFKL	R	E	W	V	R	V	0	2	0	1	0	0	3	0	0	0	3	0	0	0	1	1	1	1	0	1	0	14	1	1741.9	Q1JPB0	Q1JPB0	256	269	yes	yes	2;3	0.0057286	109.1	matching	matching	matching	matching	matching	MS/MS	matching	matching
EYFGGFGEVESIELPMDNK	DTPEEKIREYFGGFGE	IELPMDNKTNKRRGFC	R	E	Y	N	K	T	0	0	1	1	0	0	4	3	0	1	1	1	1	2	1	1	0	0	1	1	0	19	0	2159.97	A5D9H5;A6H6Y0	A5D9H5	200	218	yes	no	2	0.0017655	86.453	matching	matching	matching	matching	matching	matching	matching	matching
EYLDIDQMIFNR	YRRPVLLREYLDIDQM	IDQMIFNRELPQAAGV	R	E	Y	N	R	E	0	1	1	2	0	1	1	0	0	2	1	0	1	1	0	0	0	0	1	0	0	12	0	1555.73	Q29437;Q9TTK6;E1BC10;E1BD43;O46406;E1BJN3	Q29437	174	185	yes	no	2	0	286.93	matching	matching	matching	matching	MS/MS	matching	matching	matching
EYLIMGLDGATYDLK	RLQLEPGKEYLIMGLD	DGATYDLKGDPQYLLD	K	E	Y	L	K	G	1	0	0	2	0	0	1	2	0	1	3	1	1	0	0	0	1	0	2	0	0	15	0	1700.83	E1BH06;CON__P01030;P01030;CON__ENSEMBL:ENSBTAP00000007350	CON__ENSEMBL:ENSBTAP00000007350	1680	1694	no	no	2	6.0589e-08	138.19	matching	matching	matching	matching	matching	MS/MS	matching	matching
EYQDLLNVK	EEMARHLREYQDLLNV	YQDLLNVKMALDIEIA	R	E	Y	V	K	M	0	0	1	1	0	1	1	0	0	0	2	1	0	0	0	0	0	0	1	1	0	9	0	1120.58	P48616;O62654;Q08DH7;O77788;F1MDZ2;F1MSQ6	P48616	382	390	no	no	2	9.8833e-304	224.86	matching	matching	matching	matching	MS/MS	matching	matching	matching
EYQTIEDK	AEDKLITREYQTIEDK	EYQTIEDKCVYNCSFI	R	E	Y	D	K	C	0	0	0	1	0	1	2	0	0	1	0	1	0	0	0	0	1	0	1	0	0	8	0	1024.47	Q5GN72;Q3SZR3;CON__Q3SZR3	Q5GN72	83	90	yes	no	2	0.038568	70.256	matching	matching	matching	matching	matching	matching	MS/MS	matching
EYTDASFSNQK	SYKKLVYREYTDASFS	DASFSNQKQRGPEEEH	R	E	Y	Q	K	Q	1	0	1	1	0	1	1	0	0	0	0	1	0	1	0	2	1	0	1	0	0	11	0	1288.56	F1N076;CON__ENSEMBL:ENSBTAP00000031900	F1N076	426	436	no	no	2	0.00032823	131.12	matching	matching	matching	matching	matching	MS/MS	matching	matching
EYVLPSFEVQLEPEEK	FSAEFEVKEYVLPSFE	VQLEPEEKFYYIDDPD	K	E	Y	E	K	F	0	0	0	0	0	1	5	0	0	0	2	1	0	1	2	1	0	0	1	2	0	16	0	1934.95	Q2UVX4;CON__Q2UVX4;G3X7A5	Q2UVX4	225	240	yes	no	2;3	2.5346e-245	227.63	MS/MS	MS/MS	MS/MS	MS/MS	matching	MS/MS	MS/MS	MS/MS
EYYEALPELK	DKKGYEAKEYYEALPE	YEALPELKLAIDQIDK	K	E	Y	L	K	L	1	0	0	0	0	0	3	0	0	0	2	1	0	0	1	0	0	0	2	0	0	10	0	1253.62	Q0VCM4	Q0VCM4	731	740	yes	yes	2	0.02845	85.355	matching	matching	matching	matching	matching	matching	matching	matching
EYYFAEVR	DDFKTQVREYYFAEVR	EYYFAEVRAADFSDPA	R	E	Y	V	R	A	1	1	0	0	0	0	2	0	0	0	0	0	0	1	0	0	0	0	2	1	0	8	0	1075.5	CON__ENSEMBL:ENSBTAP00000018574;A6QPP2	CON__ENSEMBL:ENSBTAP00000018574	239	246	yes	no	2	0.00030047	120.15	matching	matching	matching	MS/MS	matching	MS/MS	matching	matching
FAAANGIPTIPGQQLVTER	LTDQGAARFAAANGIP	GQQLVTERSRKRLEKE	R	F	A	E	R	S	3	1	1	0	0	2	1	2	0	2	1	0	0	1	2	0	2	0	0	1	0	19	0	1982.06	Q32LE5	Q32LE5	125	143	yes	yes	2	0.0031962	77.554	matching	matching	matching	matching	matching	matching	matching	matching
FAAYFQQGDMESNGK	PYDQYLHRFAAYFQQG	GDMESNGKYITKSGTR	R	F	A	G	K	Y	2	0	1	1	0	2	1	2	0	0	0	1	1	2	0	1	0	0	1	0	0	15	0	1691.72	Q3ZBD7;CON__Q3ZBD7	Q3ZBD7	348	362	no	no	2	2.2149e-274	214.58	matching	matching	matching	matching	matching	matching	matching	matching
FADDTYTESYISTIGVDFK	GKSCLLLRFADDTYTE	STIGVDFKIRTIELDG	R	F	A	F	K	I	1	0	0	3	0	0	1	1	0	2	0	1	0	2	0	2	3	0	2	1	0	19	0	2170.99	Q2HJH2;A1L528;G3MYN4	Q2HJH2	28	46	yes	no	2	0.00012598	123.54	matching	matching	matching	matching	matching	MS/MS	matching	matching
FADLSEAANR	AEEWYKSKFADLSEAA	DLSEAANRNNDALRQA	K	F	A	N	R	N	3	1	1	1	0	0	1	0	0	0	1	0	0	1	0	1	0	0	0	0	0	10	0	1092.52	P48616	P48616	295	304	yes	yes	2	2.5876e-33	158.47	matching	matching	matching	matching	MS/MS	MS/MS	matching	matching
FAHYIITSQVVNSADTAK	VNCKVTSRFAHYIITS	VNSADTAKEVSFNVEI	R	F	A	A	K	E	3	0	1	1	0	1	0	0	1	2	0	1	0	1	0	2	2	0	1	2	0	18	0	1964	Q0VCM5;F1MMP5;CON__Q0VCM5	Q0VCM5	61	78	yes	no	2;3	2.3109e-16	147.75	matching	matching	matching	matching	matching	matching	matching	matching
FAIQDISVEETSAK	MIWTIILRFAIQDISV	SVEETSAKEGLLLWCQ	R	F	A	A	K	E	2	0	0	1	0	1	2	0	0	2	0	1	0	1	0	2	1	0	0	1	0	14	0	1536.77	Q3B7N2;Q3ZC55;F1MRD4;Q0III9;A5D7D1	A5D7D1	153	166	no	no	2	1.1238e-78	172.09	matching	matching	matching	matching	matching	matching	matching	matching
FALPQYLK	KISQRYQKFALPQYLK	FALPQYLKTVYQHQKA	K	F	A	L	K	T	1	0	0	0	0	1	0	0	0	0	2	1	0	1	1	0	0	0	1	0	0	8	0	978.554	CON__P02663;P02663	CON__P02663	174	181	yes	no	1;2	6.9453e-11	139.68	MS/MS	MS/MS	MS/MS	MS/MS	MS/MS	MS/MS	MS/MS	MS/MS
FATASADGQIFIYDGK	RFSPDGNRFATASADG	QIFIYDGKTGEKVCAL	R	F	A	G	K	T	3	0	0	2	0	1	0	2	0	2	0	1	0	2	0	1	1	0	1	0	0	16	0	1702.82	Q2KJH4;F1MTP5	Q2KJH4	204	219	yes	no	2	0.0037359	58.688	matching	matching	matching	matching	matching	matching	matching	matching
FDASVDQASINPGK	SLSMLSTRFDASVDQA	QASINPGKQRFEKMIS	R	F	D	G	K	Q	2	0	1	2	0	1	0	1	0	1	0	1	0	1	1	2	0	0	0	1	0	14	0	1447.69	E1BCS3;F1N3X0	E1BCS3	732	745	yes	no	2	4.4088e-64	169.4	matching	matching	matching	matching	matching	matching	matching	matching
FDDAVVQSDMK	AKRLIGRRFDDAVVQS	AVVQSDMKHWPFMVVN	R	F	D	M	K	H	1	0	0	3	0	1	0	0	0	0	0	1	1	1	0	1	0	0	0	2	0	11	0	1253.56	P19120	P19120	78	88	yes	yes	2	0.0078496	88.101	matching	matching	matching	matching	matching	matching	matching	matching
FDDENFILK	GKSIYGEKFDDENFIL	DDENFILKHTGPGILS	K	F	D	L	K	H	0	0	1	2	0	0	1	0	0	1	1	1	0	2	0	0	0	0	0	0	0	9	0	1139.55	P62935;G3X8B1;G3MZS9;A4FV72	P62935	83	91	yes	no	2	4.3766e-70	174.86	matching	matching	matching	matching	matching	MS/MS	matching	matching
FDGALNVDLTEFQTNLVPYPR	SSITASLRFDGALNVD	TNLVPYPRIHFPLATY	R	F	D	P	R	I	1	1	2	2	0	1	1	1	0	0	3	0	0	2	2	0	2	0	1	2	0	21	0	2408.2	Q3ZCJ7;P81947;F2Z4C1;Q2HJ86;P81948;F1MNF8;Q2HJB8;F6RP72;Q32KN8;F2Z4K0	Q3ZCJ7	244	264	yes	no	2;3	0.013732	56.719	matching	matching	matching	matching	matching	MS/MS	matching	matching
FDGILGMAYPR	GVVFIAAKFDGILGMA	ILGMAYPRISVNNVLP	K	F	D	P	R	I	1	1	0	1	0	0	0	2	0	1	1	0	1	1	1	0	0	0	1	0	0	11	0	1238.61	F1MMR6;P80209	F1MMR6	195	205	yes	no	2	1.6497e-10	141.1	matching	matching	matching	matching	matching	MS/MS	matching	matching
FDHVITNANENYQAR	QRQGQPIRFDHVITNA	ANENYQARSSKFTCKV	R	F	D	A	R	S	2	1	3	1	0	1	1	0	1	1	0	0	0	1	0	0	1	0	1	1	0	15	0	1790.83	Q2KIV9	Q2KIV9	136	150	yes	yes	3	7.8019e-05	104.7	matching	matching	matching	matching	matching	matching	matching	matching
FDKEIPAWVPLDPAAQNTK	YDGQDFIKFDKEIPAW	DPAAQNTKRKWEAEAV	K	F	D	T	K	R	3	0	1	2	0	1	1	0	0	1	1	2	0	1	3	0	1	1	0	1	0	19	1	2139.1	Q3ZCH5	Q3ZCH5	144	162	yes	yes	3	0.0064817	70.094	matching	matching	matching	matching	matching	MS/MS	MS/MS	matching
FDLGQDVIDFTGHALALYR	SMREVYKKFDLGQDVI	GHALALYRTDDYLDQP	K	F	D	Y	R	T	2	1	0	3	0	1	0	2	1	1	3	0	0	2	0	0	1	0	1	1	0	19	0	2150.08	P50397;P21856	P50397	175	193	no	no	3	7.1547e-66	163.91	matching	matching	matching	matching	matching	MS/MS	MS/MS	matching
FDLVPVPPNLYGDFFTGDAYVILK	LQIWRVEKFDLVPVPP	GDAYVILKTVQLRNGN	K	F	D	L	K	T	1	0	1	3	0	0	0	2	0	1	3	1	0	3	3	0	1	0	2	3	0	24	0	2699.39	F1N1I6;CON__Q3SX14;Q3SX14;F1MJH1	F1N1I6	75	98	yes	no	2;3	1.8705e-16	114.39	matching	MS/MS	matching	MS/MS	MS/MS	MS/MS	matching	matching
FDPNLTQR	FQGFWRSKFDPNLTQR	FDPNLTQRGAFHLDEQ	K	F	D	Q	R	G	0	1	1	1	0	1	0	0	0	0	1	0	0	1	1	0	1	0	0	0	0	8	0	989.493	P28800;CON__P28800	P28800	246	253	yes	no	2	0.0022071	107.21	matching	matching	matching	MS/MS	matching	MS/MS	matching	matching
FDQQKYDAIAADLRAVLLR	QDELAMSKFDQQKYDA	DLRAVLLRAGRDDIQV	K	F	D	L	R	A	4	2	0	3	0	2	0	0	0	1	3	1	0	1	0	0	0	0	1	1	0	19	2	2205.19	G3N001	G3N001	443	461	yes	yes	3	0.0023787	78.228	matching	matching	matching	matching	matching	matching	matching	matching
FDRPFLIAIALK	SFQKTTVRFDRPFLIA	FLIAIALKDTQSIIFL	R	F	D	L	K	D	2	1	0	1	0	0	0	0	0	2	2	1	0	2	1	0	0	0	0	0	0	12	1	1402.83	G8JKW7	G8JKW7	384	395	yes	yes	3	0.00017505	132.56	matching	MS/MS	matching	matching	matching	matching	matching	matching
FEEEIKAEQEER	QAMNVSSRFEEEIKAE	IKAEQEERKKQAEEMK	R	F	E	E	R	K	1	1	0	0	0	1	6	0	0	1	0	1	0	1	0	0	0	0	0	0	0	12	1	1535.71	A5D7A0	A5D7A0	209	220	yes	yes	2;3	6.9767e-06	135.04	matching	matching	matching	matching	matching	matching	matching	matching
FEEELAAR	YTEEELRRFEEELAAR	FEEELAAREAELNAKA	R	F	E	A	R	E	2	1	0	0	0	0	3	0	0	0	1	0	0	1	0	0	0	0	0	0	0	8	0	963.466	Q0P569	Q0P569	364	371	yes	yes	2	1.3704e-06	132.76	MS/MS	matching	matching	matching	matching	matching	MS/MS	MS/MS
FEELNADLFR	YTSITRARFEELNADL	ELNADLFRGTLDPVEK	R	F	E	F	R	G	1	1	1	1	0	0	2	0	0	0	2	0	0	2	0	0	0	0	0	0	0	10	0	1252.61	P19120;P34933	P19120	302	311	yes	no	2	3.4801e-71	183.85	matching	matching	matching	matching	matching	MS/MS	MS/MS	matching
FENAAAGNKPEAVEVTFADFDGVLYHISNPNGDK	IEETLALKFENAAAGN	ISNPNGDKTKVMVSIS	K	F	E	D	K	T	5	0	4	3	0	0	3	3	1	1	1	2	0	3	2	1	1	0	1	3	0	34	1	3635.72	Q3MHR7	Q3MHR7	19	52	yes	yes	3;4	4.0976e-16	86.722	matching	matching	matching	matching	matching	MS/MS	matching	matching
FFKPAMPFDLMVYVTNPDGSPAR	IHFTKTPKFFKPAMPF	NPDGSPARHIPVVTQG	K	F	F	A	R	H	2	1	1	2	0	0	0	1	0	0	1	1	2	3	4	1	1	0	1	2	0	23	1	2599.26	Q2UVX4;CON__Q2UVX4;G3X7A5	Q2UVX4	362	384	yes	no	3	0.00014385	73.153	matching	MS/MS	matching	matching	matching	matching	matching	matching
FFVAPFPEVFGK	VLNENLLRFFVAPFPE	PFPEVFGKEKVNELSK	R	F	F	G	K	E	1	0	0	0	0	0	1	1	0	0	0	1	0	4	2	0	0	0	0	2	0	12	0	1383.72	CON__P02662;P02662	CON__P02662	23	34	yes	no	2	3.7792e-53	160.91	MS/MS	MS/MS	MS/MS	MS/MS	MS/MS	MS/MS	MS/MS	MS/MS
FFVAPFPEVFGKEK	VLNENLLRFFVAPFPE	PEVFGKEKVNELSKDI	R	F	F	E	K	V	1	0	0	0	0	0	2	1	0	0	0	2	0	4	2	0	0	0	0	2	0	14	1	1640.86	CON__P02662;P02662	CON__P02662	23	36	yes	no	2;3	0.0030136	132.97	matching	MS/MS	matching	matching	matching	MS/MS	matching	matching
FFVGGNWK	________________	FFVGGNWKMNGRKNNL	K	F	F	W	K	M	0	0	1	0	0	0	0	2	0	0	0	1	0	2	0	0	0	1	0	1	0	8	0	953.476	Q5E956	Q5E956	7	14	yes	yes	2	0.036036	66.799	matching	matching	matching	matching	matching	matching	matching	matching
FGDPVVQSDMK	AKRLIGRKFGDPVVQS	PVVQSDMKHWPFRVIN	K	F	G	M	K	H	0	0	0	2	0	1	0	1	0	0	0	1	1	1	1	1	0	0	0	2	0	11	0	1221.57	Q27975;Q27965	Q27975	78	88	yes	no	2	0.002963	116.74	matching	matching	matching	matching	matching	matching	matching	matching
FGFDIELFQHAVK	CTIPGVYRFGFDIELF	ELFQHAVKLGLMKNDT	R	F	G	V	K	L	1	0	0	1	0	1	1	1	1	1	1	1	0	3	0	0	0	0	0	1	0	13	0	1549.79	Q2KIU3;CON__Q2KIU3	Q2KIU3	134	146	yes	no	2;3	0	232.78	matching	MS/MS	MS/MS	MS/MS	MS/MS	MS/MS	MS/MS	matching
FGGVLHLSDLDNDGLDEIIVAAPLR	SGNRRFSRFGGVLHLS	IIVAAPLRITDATAGL	R	F	G	L	R	I	2	1	1	4	0	0	1	3	1	2	5	0	0	1	1	1	0	0	0	2	0	25	0	2648.38	P80109	P80109	717	741	yes	yes	3	0.0019754	63.125	matching	matching	matching	matching	matching	matching	matching	matching
FGHMEVPSTVSR	NVFTFAFRFGHMEVPS	EVPSTVSRLDENYQPW	R	F	G	S	R	L	0	1	0	0	0	0	1	1	1	0	0	0	1	1	1	2	1	0	0	2	0	12	0	1345.64	P80025;G3MXZ0	P80025	466	477	yes	no	2;3	0.0006942	125.36	MS/MS	matching	MS/MS	MS/MS	MS/MS	MS/MS	MS/MS	MS/MS
FGLLGEDGEK	VQGVAYVRFGLLGEDG	LLGEDGEKTFLRGLES	R	F	G	E	K	T	0	0	0	1	0	0	2	3	0	0	2	1	0	1	0	0	0	0	0	0	0	10	0	1063.52	E1BH06;CON__P01030;CON__ENSEMBL:ENSBTAP00000007350;F1MVK1	CON__ENSEMBL:ENSBTAP00000007350	284	293	no	no	2	0.015417	94.692	matching	matching	matching	matching	matching	matching	matching	matching
FGPLVEQGQSR	SLSAIRERFGPLVEQG	LVEQGQSRAATLSTLA	R	F	G	S	R	A	0	1	0	0	0	2	1	2	0	0	1	0	0	1	1	1	0	0	0	1	0	11	0	1216.62	Q03247;CON__Q03247	Q03247	198	208	yes	no	2	0.0002139	133.32	matching	MS/MS	matching	matching	matching	matching	matching	MS/MS
FGSLEDVQAK	MKQTNSFKFGSLEDVQ	SLEDVQAKILEIPYKG	K	F	G	A	K	I	1	0	0	1	0	1	1	1	0	0	1	1	0	1	0	1	0	0	0	1	0	10	0	1092.55	E1B8B5	E1B8B5	169	178	yes	yes	2	0.00099221	112.83	matching	matching	matching	matching	matching	matching	matching	matching
FGVEQNVDMVFASFIR	EKDIQDLKFGVEQNVD	MVFASFIRKASDVHEV	K	F	G	I	R	K	1	1	1	1	0	1	1	1	0	1	0	0	1	3	0	1	0	0	0	3	0	16	0	1857.91	A5D984	A5D984	231	246	yes	yes	2;3	1.485e-209	196.45	matching	matching	matching	matching	matching	MS/MS	matching	matching
FHPDTDDVPVPAPAGDQK	PGPEGQLKFHPDTDDV	PAPAGDQKDVDASEKK	K	F	H	Q	K	D	2	0	0	4	0	1	0	1	1	0	0	1	0	1	4	0	1	0	0	2	0	18	0	1904.89	Q0P569	Q0P569	433	450	yes	yes	2;3	4.7966e-14	129.42	MS/MS	MS/MS	matching	matching	matching	MS/MS	matching	MS/MS
FIEDAQVLYSSEAFPTNFR	EELKLLDKFIEDAQVL	EAFPTNFRDSEAARSL	K	F	I	F	R	D	2	1	1	1	0	1	2	0	0	1	1	0	0	3	1	2	1	0	1	1	0	19	0	2233.07	Q9TTE1;CON__Q9TTE1;A2I7M9	Q9TTE1	147	165	yes	no	2;3	2.742e-130	183.21	matching	MS/MS	MS/MS	MS/MS	MS/MS	MS/MS	MS/MS	matching
FIIPQIVK	QRNVNVFKFIIPQIVK	FIIPQIVKYSPDCIII	K	F	I	V	K	Y	0	0	0	0	0	1	0	0	0	3	0	1	0	1	1	0	0	0	0	1	0	8	0	956.606	Q5E9B1	Q5E9B1	120	127	yes	yes	2	0.0031759	102.71	matching	matching	matching	matching	matching	MS/MS	matching	matching
FITHAPPGEFNEVFNDVR	EKVRIAAKFITHAPPG	NEVFNDVRLLLNNDNL	K	F	I	V	R	L	1	1	2	1	0	0	2	1	1	1	0	0	0	3	2	0	1	0	0	2	0	18	0	2088.01	A4FUA8	A4FUA8	20	37	yes	yes	3	5.6962e-05	107.62	matching	matching	matching	matching	matching	matching	matching	matching
FKDLGEEHFK	HKSEIAHRFKDLGEEH	DLGEEHFKGLVLIAFS	R	F	K	F	K	G	0	0	0	1	0	0	2	1	1	0	1	2	0	2	0	0	0	0	0	0	0	10	1	1248.61	P02769;CON__P02769	P02769	35	44	yes	no	2;3	6.9569e-167	199.33	MS/MS	MS/MS	MS/MS	MS/MS	MS/MS	MS/MS	MS/MS	MS/MS
FKDLGEENFK	HKSEVAHRFKDLGEEN	DLGEENFKALVLIAFA	R	F	K	F	K	A	0	0	1	1	0	0	2	1	0	0	1	2	0	2	0	0	0	0	0	0	0	10	1	1225.6	CON__P02768-1	CON__P02768-1	35	44	yes	yes	2;3	1.9962e-07	144.55	matching	matching	matching	MS/MS	MS/MS	matching	matching	matching
FKLEESYDLQEPLAR	EVRVQLPRFKLEESYD	DLQEPLARLGVRDLFS	R	F	K	A	R	L	1	1	0	1	0	1	3	0	0	0	3	1	0	1	1	1	0	0	1	0	0	15	1	1836.93	Q1JPB0	Q1JPB0	275	289	yes	yes	2;3	2.6543e-98	177.04	matching	matching	matching	matching	matching	MS/MS	matching	matching
FKVEESYDLVATLR	EVDLYLPRFKVEESYD	YDLVATLRALGMVDAF	R	F	K	L	R	A	1	1	0	1	0	0	2	0	0	0	2	1	0	1	0	1	1	0	1	2	0	14	1	1668.87	A6QPZ4	A6QPZ4	235	248	yes	yes	2;3	2.0412e-94	187	matching	matching	matching	matching	matching	MS/MS	matching	matching
FKVEESYDLVPTLR	EVDLYLPRFKVEESYD	YDLVPTLRALGMVDAF	R	F	K	L	R	A	0	1	0	1	0	0	2	0	0	0	2	1	0	1	1	1	1	0	1	2	0	14	1	1694.89	G5E537	G5E537	142	155	yes	yes	2;3	1.2404e-112	196.97	matching	matching	matching	matching	MS/MS	MS/MS	matching	matching
FLDDDLTDDIMCVK	ICNISCDKFLDDDLTD	TDDIMCVKKILDKVGI	K	F	L	V	K	K	0	0	0	5	1	0	0	0	0	1	2	1	1	1	0	0	1	0	0	1	0	14	0	1698.75	CON__P00711;P00711	CON__P00711	80	93	yes	no	2	1.7531e-156	214.23	matching	matching	matching	matching	matching	matching	MS/MS	matching
FLEQELETVTIPDLR	LVKQEGLRFLEQELET	TVTIPDLRGSEGHFFY	R	F	L	L	R	G	0	1	0	1	0	1	3	0	0	1	3	0	0	1	1	0	2	0	0	1	0	15	0	1801.95	Q58DL9	Q58DL9	55	69	yes	yes	2	0.042653	68.283	matching	matching	matching	matching	matching	matching	matching	matching
FLEQQNQVLQTK	ASFIDKVRFLEQQNQV	QNQVLQTKWELLQQVD	R	F	L	T	K	W	0	0	1	0	0	4	1	0	0	0	2	1	0	1	0	0	1	0	0	1	0	12	0	1474.78	CON__P04264;G3N0V2;CON__ENSEMBL:ENSBTAP00000038253;CON__P35908;CON__Q7Z794	CON__P04264	200	211	no	no	2	0	234.49	matching	matching	matching	matching	matching	matching	matching	matching
FLIPNASQAESK	DVLSLLEKFLIPNASQ	NASQAESKVFYLKMKG	K	F	L	S	K	V	2	0	1	0	0	1	1	0	0	1	1	1	0	1	1	2	0	0	0	0	0	12	0	1303.68	P63103	P63103	104	115	yes	yes	2	0.015304	86.288	matching	matching	matching	matching	matching	matching	matching	matching
FLLPVPQLK	RLEDFSPKFLLPVPQL	LLPVPQLKVLDLTRNS	K	F	L	L	K	V	0	0	0	0	0	1	0	0	0	0	3	1	0	1	2	0	0	0	0	1	0	9	0	1053.66	Q2KIF2;CON__Q2KIF2	Q2KIF2	110	118	yes	no	2	0.0033471	117.4	matching	matching	matching	matching	matching	MS/MS	matching	matching
FLMANGQLVK	WNVDLIPKFLMANGQL	MANGQLVKMLLFTEVT	K	F	L	V	K	M	1	0	1	0	0	1	0	1	0	0	2	1	1	1	0	0	0	0	0	1	0	10	0	1119.61	P50397;P21856	P50397	80	89	no	no	2	9.812e-05	123.35	matching	matching	matching	matching	matching	matching	matching	matching
FLNQPETTLLHPIIQFDR	TEAVPEVRFLNQPETT	HPIIQFDRSFLLLILE	R	F	L	D	R	S	0	1	1	1	0	2	1	0	1	2	3	0	0	2	2	0	2	0	0	0	0	18	0	2181.16	Q9TT36;Q3SYR0;CON__Q9TT36	Q9TT36	368	385	yes	no	3	4.4244e-05	96.673	matching	matching	matching	matching	matching	MS/MS	matching	matching
FLQEIYNSNSQK	STHESTIRFLQEIYNS	IYNSNSQKIVNLRDKV	R	F	L	Q	K	I	0	0	2	0	0	2	1	0	0	1	1	1	0	1	0	2	0	0	1	0	0	12	0	1469.72	Q3SZZ9;F1MGU7	Q3SZZ9	133	144	yes	no	2;3	0	270.93	matching	MS/MS	matching	matching	MS/MS	matching	MS/MS	MS/MS
FLQEYLDNVQK	LYGEKEFRFLQEYLDN	EYLDNVQKFYLASVES	R	F	L	Q	K	F	0	0	1	1	0	2	1	0	0	0	2	1	0	1	0	0	0	0	1	1	0	11	0	1395.7	A6QPZ4	A6QPZ4	63	73	yes	yes	2	2.9643e-75	196.67	matching	matching	matching	matching	matching	matching	matching	matching
FLQEYMDNVQK	LYREKEFRFLQEYMDN	EYMDNVQKFYLASVES	R	F	L	Q	K	F	0	0	1	1	0	2	1	0	0	0	1	1	1	1	0	0	0	0	1	1	0	11	0	1413.66	E1B8B5;F1MMS7	E1B8B5	63	73	no	no	2	2.0646e-221	213.63	matching	matching	matching	MS/MS	MS/MS	MS/MS	matching	matching
FLVYVANFDENDPR	FEKRRFRKFLVYVANF	NFDENDPRTFEGIDPK	K	F	L	P	R	T	1	1	2	2	0	0	1	0	0	0	1	0	0	2	1	0	0	0	1	2	0	14	0	1697.8	P50397	P50397	143	156	yes	yes	2	5.6475e-10	138.21	matching	matching	matching	matching	matching	matching	matching	matching
FLYGEQVDGTAFVIFGVQDGDR	LKVNIIARFLYGEQVD	FGVQDGDRRISLTHSL	R	F	L	D	R	R	1	1	0	3	0	2	1	4	0	1	1	0	0	3	0	0	1	0	1	3	0	22	0	2432.16	Q2UVX4;CON__Q2UVX4;G3X7A5	Q2UVX4	258	279	yes	no	2;3	0	245.63	MS/MS	MS/MS	MS/MS	MS/MS	MS/MS	MS/MS	MS/MS	MS/MS
FLYGEQVDGTAFVIFGVQDGDRR	LKVNIIARFLYGEQVD	GVQDGDRRISLTHSLT	R	F	L	R	R	I	1	2	0	3	0	2	1	4	0	1	1	0	0	3	0	0	1	0	1	3	0	23	1	2588.27	Q2UVX4;CON__Q2UVX4;G3X7A5	Q2UVX4	258	280	yes	no	3	4.4598e-13	102.79	matching	MS/MS	matching	matching	matching	MS/MS	matching	matching
FMETATESLAK	PYDLSNPRFMETATES	TATESLAKYNSESPSK	R	F	M	A	K	Y	2	0	0	0	0	0	2	0	0	0	1	1	1	1	0	1	2	0	0	0	0	11	0	1226.59	Q58D62;CON__Q58D62	Q58D62	168	178	yes	no	2	0.0055914	95.477	matching	matching	matching	matching	matching	matching	matching	matching
FMYEYSINYGQAPLTLLVGYTK	DPKDFADRFMYEYSIN	TLLVGYTKSYLSMVGS	R	F	M	T	K	S	1	0	1	0	0	1	1	2	0	1	3	1	1	1	1	1	2	0	4	1	0	22	0	2570.28	Q3MHN5;CON__Q3MHN5;F1N5M2;CON__ENSEMBL:ENSBTAP00000018229	F1N5M2	159	180	no	no	2;3	2.0992e-79	150.65	matching	matching	matching	MS/MS	matching	matching	matching	matching
FNEEHIPDSPFVVPVASPSGDAR	GDYEVSVKFNEEHIPD	ASPSGDARRLTVSSLQ	K	F	N	A	R	R	2	1	1	2	0	0	2	1	1	1	0	0	0	2	4	3	0	0	0	3	0	23	0	2466.18	F1N169	F1N169	2314	2336	yes	yes	3	0.0038937	54.857	matching	matching	matching	matching	matching	matching	matching	matching
FNEMMKVVQVYAETQEINLK	LIFKNCERFNEMMKVV	ETQEINLKADSEVAQA	R	F	N	L	K	A	1	0	2	0	0	2	3	0	0	1	1	2	2	1	0	0	1	0	1	3	0	20	1	2413.2	F1MNE1	F1MNE1	1037	1056	yes	yes	3	0.041451	47.222	matching	matching	MS/MS	matching	matching	matching	matching	matching
FNTFIHEDLWNIR	MTSHQCKRFNTFIHED	HEDLWNIRSICSTTNI	R	F	N	I	R	S	0	1	2	1	0	0	1	0	1	2	1	0	0	2	0	0	1	1	0	0	0	13	0	1703.84	P15467;Q58DP6	P15467	42	54	yes	no	3	0.00044738	126.83	matching	matching	MS/MS	matching	matching	MS/MS	MS/MS	matching
FPDATETDLQELVAK	LAERLRGKFPDATETD	DLQELVAKRSDFASKC	K	F	P	A	K	R	2	0	0	2	0	1	2	0	0	0	2	1	0	1	1	0	2	0	0	1	0	15	0	1675.83	Q3MHN5;CON__Q3MHN5;F1N5M2;CON__ENSEMBL:ENSBTAP00000018229	F1N5M2	429	443	no	no	2	0	288.96	matching	MS/MS	MS/MS	MS/MS	MS/MS	MS/MS	MS/MS	matching
FPFGYIK	KMMYQKKKFPFGYIKD	KFPFGYIKDLKCRVLE	K	F	P	I	K	D	0	0	0	0	0	0	0	1	0	1	0	1	0	2	1	0	0	0	1	0	0	7	0	870.464	Q1JPB0;G1K1L8	Q1JPB0	203	209	yes	no	2	0.014636	77.72	matching	matching	matching	matching	matching	matching	matching	matching
FPKAEFVEVTK	SVARLSQKFPKAEFVE	AEFVEVTKLVTDLTKV	K	F	P	T	K	L	1	0	0	0	0	0	2	0	0	0	0	2	0	2	1	0	1	0	0	2	0	11	1	1293.7	P02769;CON__P02769	P02769	246	256	yes	no	2;3	2.3701e-05	134.38	matching	matching	matching	matching	MS/MS	matching	matching	matching
FPLGPVTSTTR	ESPAHEHRFPLGPVTS	GPVTSTTRGLYRCSYK	R	F	P	T	R	G	0	1	0	0	0	0	0	1	0	0	1	0	0	1	2	1	3	0	0	1	0	11	0	1174.63	Q2KJF1;CON__Q2KJF1	Q2KJF1	81	91	yes	no	2	0.0010393	128.88	matching	matching	MS/MS	MS/MS	MS/MS	MS/MS	matching	MS/MS
FPQYLQYLYQGPIVLNPWDQVK	EINQFYQKFPQYLQYL	LNPWDQVKRNAVPITP	K	F	P	V	K	R	0	0	1	1	0	4	0	1	0	1	3	1	0	1	3	0	0	1	3	2	0	22	0	2708.4	CON__P02663;P02663	CON__P02663	92	113	yes	no	2;3	6.6905e-114	185.96	MS/MS	matching	MS/MS	matching	matching	MS/MS	matching	matching
FPVAFLAPVMNLPEEHSR	EIFSRDDRFPVAFLAP	NLPEEHSRMVYFAISD	R	F	P	S	R	M	2	1	1	0	0	0	2	0	1	0	2	0	1	2	3	1	0	0	0	2	0	18	0	2053.05	Q2TBI0;F1MNN7	Q2TBI0	258	275	yes	no	3	9.8034e-65	170.42	matching	matching	matching	matching	MS/MS	MS/MS	matching	matching
FQCPSSGISQQDPLKNFKK	HGYLIRERFQCPSSGI	DPLKNFKKAVWMVKSR	R	F	Q	K	K	A	0	0	1	1	1	3	0	1	0	1	1	3	0	2	2	3	0	0	0	0	0	19	2	2208.1	F1MCC8	F1MCC8	1295	1313	yes	yes	2	0.025109	55.437	matching	matching	matching	matching	matching	matching	matching	matching
FQDGVLEPDFPR	FKGSQYWRFQDGVLEP	VLEPDFPRNISDGFGG	R	F	Q	P	R	N	0	1	0	2	0	1	1	1	0	0	1	0	0	2	2	0	0	0	0	1	0	12	0	1418.68	Q3ZBS7;CON__Q3ZBS7	Q3ZBS7	226	237	yes	no	2	0.0017079	117.7	matching	MS/MS	matching	MS/MS	MS/MS	matching	matching	matching
FQDTGPQAPVGSVYQK	TFHKESSRFQDTGPQA	PVGSVYQKTNAVSEIK	R	F	Q	Q	K	T	1	0	0	1	0	3	0	2	0	0	0	1	0	1	2	1	1	0	1	2	0	16	0	1720.84	A6H7G2	A6H7G2	149	164	yes	yes	2	2.109e-44	158.14	matching	matching	matching	matching	matching	MS/MS	matching	matching
FQSEEQQQTEDELQDK	RINKKIEKFQSEEQQQ	TEDELQDKIHPFAQTQ	K	F	Q	D	K	I	0	0	0	2	0	5	4	0	0	0	1	1	0	1	0	1	1	0	0	0	0	16	0	1980.85	CON__P02666;P02666	CON__P02666	33	48	yes	no	2;3	0	416.08	MS/MS	MS/MS	MS/MS	MS/MS	MS/MS	MS/MS	MS/MS	MS/MS
FQTFEGELK	CGVPDVGRFQTFEGEL	QTFEGELKWHHHNITY	R	F	Q	L	K	W	0	0	0	0	0	1	2	1	0	0	1	1	0	2	0	0	1	0	0	0	0	9	0	1097.54	P52176;F1MF56	P52176	107	115	yes	no	2	0.0070212	97.565	matching	matching	MS/MS	matching	matching	matching	matching	matching
FQVVIQK	VAALPACKFQVVIQKL	KFQVVIQKL_______	K	F	Q	Q	K	L	0	0	0	0	0	2	0	0	0	1	0	1	0	1	0	0	0	0	0	2	0	7	0	860.512	Q3T086	Q3T086	152	158	yes	yes	2	0.0071046	89.673	matching	matching	matching	matching	matching	matching	matching	matching
FRDQQVPYATK	LHGATTHRFRDQQVPY	QQVPYATKGNQWVAYD	R	F	R	T	K	G	1	1	0	1	0	2	0	0	0	0	0	1	0	1	1	0	1	0	1	1	0	11	1	1351.69	G3X7D2;P30922	G3X7D2	319	329	yes	no	2;3	0.0081382	114.71	matching	MS/MS	matching	matching	matching	MS/MS	matching	MS/MS
FREDALALYTSEAFSTNFK	EQLKLLDKFREDALAL	EAFSTNFKDPETAKSL	K	F	R	F	K	D	3	1	1	1	0	0	2	0	0	0	2	1	0	3	0	2	2	0	1	0	0	19	1	2209.07	A6QPQ2;A0A0A0MP89	A6QPQ2	150	168	yes	no	3	0.028038	46.925	matching	matching	matching	matching	matching	matching	matching	matching
FREDALALYTSEAFSTNFKDPETAK	EQLKLLDKFREDALAL	FKDPETAKSLINDYVK	K	F	R	A	K	S	4	1	1	2	0	0	3	0	0	0	2	2	0	3	1	2	3	0	1	0	0	25	2	2850.37	A6QPQ2;A0A0A0MP89	A6QPQ2	150	174	yes	no	3;4	0.00025122	75.82	matching	matching	matching	matching	matching	matching	matching	matching
FSGWYDADLSPAGHEEAK	STWNLENRFSGWYDAD	PAGHEEAKRGGQALRD	R	F	S	A	K	R	3	0	0	2	0	0	2	2	1	0	1	1	0	1	1	2	0	1	1	0	0	18	0	1978.87	Q3SZ62	Q3SZ62	22	39	yes	yes	2;3	8.1154e-299	214.54	matching	matching	matching	matching	matching	MS/MS	matching	matching
FSIATDYK	IHELNLPRFSIATDYK	FSIATDYKLKDILSQL	R	F	S	Y	K	L	1	0	0	1	0	0	0	0	0	1	0	1	0	1	0	1	1	0	1	0	0	8	0	943.465	A6QPQ2;A0A0A0MP89	A6QPQ2	313	320	yes	no	2	0.0004108	115.49	matching	matching	matching	matching	matching	matching	matching	matching
FSISATYDLGDILLK	WVDLFVPKFSISATYD	DLGDILLKMGIQDAFA	K	F	S	L	K	M	1	0	0	2	0	0	0	1	0	2	3	1	0	1	0	2	1	0	1	0	0	15	0	1654.88	Q9TT36;Q3SYR0;CON__Q9TT36	Q9TT36	306	320	yes	no	2	1.7506e-16	157.35	matching	matching	matching	matching	matching	MS/MS	matching	matching
FSISSDYQLR	IDELSLPRFSISSDYQ	ISSDYQLRDILSQLGI	R	F	S	L	R	D	0	1	0	1	0	1	0	0	0	1	1	0	0	1	0	3	0	0	1	0	0	10	0	1214.59	A0A0A0MPA0;CON__REFSEQ:XP_001252647	A0A0A0MPA0	312	321	no	no	2	5.9621e-297	228.98	matching	MS/MS	matching	MS/MS	matching	MS/MS	MS/MS	matching
FSISSHYQLK	IHRLRLPRFSISSHYQ	ISSHYQLKDILSQLGI	R	F	S	L	K	D	0	0	0	0	0	1	0	0	1	1	1	1	0	1	0	3	0	0	1	0	0	10	0	1208.62	A0A0A0MP92;CON__A2I7N3;A2I7N3	A0A0A0MP92	312	321	yes	no	2;3	4.5722e-49	182.46	matching	MS/MS	MS/MS	MS/MS	matching	matching	MS/MS	matching
FSLVGIGGQDLNEGNR	ELGKNQAKFSLVGIGG	QDLNEGNRTLTLALVW	K	F	S	N	R	T	0	1	2	1	0	1	1	4	0	1	2	0	0	1	0	1	0	0	0	1	0	16	0	1674.83	F1MYX5	F1MYX5	473	488	yes	yes	2	3.1808e-286	223.14	matching	matching	matching	matching	MS/MS	MS/MS	matching	matching
FSMPSPVR	FRDIASPKFSMPSPVR	FSMPSPVRTVIAADFD	K	F	S	V	R	T	0	1	0	0	0	0	0	0	0	0	0	0	1	1	2	2	0	0	0	1	0	8	0	919.459	F1MFI4	F1MFI4	338	345	yes	yes	2	0.035094	71.379	matching	matching	matching	matching	matching	matching	matching	matching
FSMVIEDGIVK	FGNHRLKRFSMVIEDG	VIEDGIVKSLNVEPDG	R	F	S	V	K	S	0	0	0	1	0	0	1	1	0	2	0	1	1	1	0	1	0	0	0	2	0	11	0	1236.64	Q9BGI1	Q9BGI1	186	196	yes	yes	2	3.2591e-46	167.18	matching	matching	matching	matching	matching	matching	matching	matching
FSNADYAVSYMLR	QEDASSDRFSNADYAV	YAVSYMLRLGAPANKL	R	F	S	L	R	L	2	1	1	1	0	0	0	0	0	0	1	0	1	1	0	2	0	0	2	1	0	13	0	1535.71	G3X7D2;P30922	G3X7D2	242	254	yes	no	2	1.8862e-92	185.66	matching	MS/MS	matching	matching	matching	MS/MS	matching	MS/MS
FSSHVSGTLGQFYQDVLWGPLDTADDSK	LLLQNTDRFSSHVSGT	LDTADDSKRTLKVQGR	R	F	S	S	K	R	1	0	0	4	0	2	0	3	1	0	3	1	0	2	1	4	2	1	1	2	0	28	0	3069.44	F1MMD7;Q3T052;CON__Q3T052	F1MMD7	853	880	yes	no	3	7.2447e-08	78.583	matching	matching	matching	matching	matching	matching	matching	matching
FSSHVSGTLGQFYQDVLWGPLDTADDSKR	LLLQNTDRFSSHVSGT	DTADDSKRTLKVQGRD	R	F	S	K	R	T	1	1	0	4	0	2	0	3	1	0	3	1	0	2	1	4	2	1	1	2	0	29	1	3225.54	F1MMD7;Q3T052;CON__Q3T052	F1MMD7	853	881	yes	no	3;4	1.7453e-36	118.63	matching	matching	matching	matching	matching	MS/MS	matching	matching
FSVLEGQR	ILRIEVGKFSVLEGQR	FSVLEGQRLVALKKFM	K	F	S	Q	R	L	0	1	0	0	0	1	1	1	0	0	1	0	0	1	0	1	0	0	0	1	0	8	0	934.487	F1MM32	F1MM32	320	327	yes	yes	2	2.0791e-45	164.96	matching	matching	matching	MS/MS	MS/MS	MS/MS	matching	matching
FSVQMFK	NGVSAESRFSVQMFKF	RFSVQMFKFAGNYDLV	R	F	S	F	K	F	0	0	0	0	0	1	0	0	0	0	0	1	1	2	0	1	0	0	0	1	0	7	0	885.442	F1N726	F1N726	440	446	yes	yes	2	1.3268e-29	166.78	MS/MS	matching	matching	matching	matching	matching	MS/MS	matching
FSWFVDDVEVNTATTK	GHDDPEVKFSWFVDDV	EVNTATTKPREEQFNS	K	F	S	T	K	P	1	0	1	2	0	0	1	0	0	0	0	1	0	2	0	1	3	1	0	3	0	16	0	1857.88	CON__ENSEMBL:ENSBTAP00000024462;CON__ENSEMBL:ENSBTAP00000024466	CON__ENSEMBL:ENSBTAP00000024462	245	260	yes	no	2;3	0	284.74	matching	MS/MS	MS/MS	matching	matching	MS/MS	MS/MS	MS/MS
FSWFVDDVEVNTATTKPR	GHDDPEVKFSWFVDDV	NTATTKPREEQFNSTY	K	F	S	P	R	E	1	1	1	2	0	0	1	0	0	0	0	1	0	2	1	1	3	1	0	3	0	18	1	2111.03	CON__ENSEMBL:ENSBTAP00000024462;CON__ENSEMBL:ENSBTAP00000024466	CON__ENSEMBL:ENSBTAP00000024462	245	262	yes	no	2;3;4	0	273.52	MS/MS	MS/MS	MS/MS	MS/MS	matching	MS/MS	MS/MS	MS/MS
FTASAGIQVVGDDLTVTNPK	DDWEAWQKFTASAGIQ	DLTVTNPKRIAKAVSE	K	F	T	P	K	R	2	0	1	2	0	1	0	2	0	1	1	1	0	1	1	1	3	0	0	3	0	20	0	2032.05	Q9XSJ4;F1MB08	Q9XSJ4	307	326	yes	no	2	3.1684e-193	193.36	matching	matching	matching	matching	matching	matching	matching	matching
FTDDDRTDHLSWEWNLTIK	GSYNIKSRFTDDDRTD	WEWNLTIKKEWKD___	R	F	T	I	K	K	0	1	1	4	0	0	1	0	1	1	2	1	0	1	0	1	3	2	0	0	0	19	1	2391.11	P19803	P19803	181	199	yes	yes	3	0.00015579	100.27	matching	matching	matching	matching	matching	matching	matching	matching
FTDEEVDELYR	LLTTMGDRFTDEEVDE	EEVDELYREAPIDKKG	R	F	T	Y	R	E	0	1	0	2	0	0	3	0	0	0	1	0	0	1	0	0	1	0	1	1	0	11	0	1414.63	A4IF97;Q5E9E2	A4IF97	133	143	yes	no	2	2.3032e-16	144.7	matching	matching	matching	matching	matching	MS/MS	matching	matching
FTDPLFK	DARENIQRFTDPLFKG	RFTDPLFKGTTSGQGQ	R	F	T	F	K	G	0	0	0	1	0	0	0	0	0	0	1	1	0	2	1	0	1	0	0	0	0	7	0	866.454	P35541;E1BJF9	P35541	85	91	yes	no	2	2.6696e-27	146.94	matching	matching	matching	MS/MS	MS/MS	MS/MS	matching	matching
FTDPLFKGTTSGQGQEDSR	DARENIQRFTDPLFKG	GQGQEDSRADQAANEW	R	F	T	S	R	A	0	1	0	2	0	2	1	3	0	0	1	1	0	2	1	2	3	0	0	0	0	19	1	2069.97	P35541;E1BJF9	P35541	85	103	yes	no	3	1.2227e-05	105.01	matching	matching	matching	matching	matching	matching	matching	matching
FTGSGSGTDFTLTISR	RYSGVSDRFTGSGSGT	DFTLTISRVQAEDAGV	R	F	T	S	R	V	0	1	0	1	0	0	0	3	0	1	1	0	0	2	0	3	4	0	0	0	0	16	0	1645.79	F1MH40	F1MH40	87	102	yes	yes	2	2.5979e-15	149.6	matching	matching	matching	matching	matching	matching	matching	matching
FTITPPTAQVVGVLK	GRWRSEWKFTITPPTA	AQVVGVLKIQVHYYED	K	F	T	L	K	I	1	0	0	0	0	1	0	1	0	1	1	1	0	1	2	0	3	0	0	3	0	15	0	1569.91	A4FUA8	A4FUA8	179	193	yes	yes	2	0.033618	67.648	matching	matching	matching	matching	matching	matching	matching	matching
FTVEETSWGPYITSVQGIK	EKNETLFRFTVEETSW	ITSVQGIKASNNDRTY	R	F	T	I	K	A	0	0	0	0	0	1	2	2	0	2	0	1	0	1	1	2	3	1	1	2	0	19	0	2141.07	E1BCU6	E1BCU6	369	387	yes	yes	2;3	8.7658e-07	122.29	matching	matching	matching	matching	matching	MS/MS	matching	matching
FVEGLYK	HGLTTEDKFVEGLYKV	KFVEGLYKVELDTKSY	K	F	V	Y	K	V	0	0	0	0	0	0	1	1	0	0	1	1	0	1	0	0	0	0	1	1	0	7	0	854.454	O46375	O46375	84	90	yes	yes	2	8.748e-11	121.29	matching	matching	matching	MS/MS	MS/MS	MS/MS	matching	matching
FVIKPIDK	NISFNDKKFVIKPIDK	FVIKPIDKKAPDFVFY	K	F	V	D	K	K	0	0	0	1	0	0	0	0	0	2	0	2	0	1	1	0	0	0	0	1	0	8	1	958.585	Q2HJ49;P31976;Q32LP2;F1MJJ8	P31976	255	262	no	no	2	0.0042885	111.74	matching	matching	matching	matching	matching	matching	matching	matching
FVLSPFSLDLSK	EAELTSWRFVLSPFSL	PFSLDLSKTKQQLIPG	R	F	V	S	K	T	0	0	0	1	0	0	0	0	0	0	3	1	0	2	1	3	0	0	0	1	0	12	0	1351.74	CON__ENSEMBL:ENSBTAP00000007350	CON__ENSEMBL:ENSBTAP00000007350	362	373	yes	yes	2	0.0033337	96.067	matching	matching	matching	matching	matching	matching	matching	matching
FVRPVPLPQTQNR	ANRAQRNRFVRPVPLP	PLPQTQNRLRPGTQCT	R	F	V	N	R	L	0	2	1	0	0	2	0	0	0	0	1	0	0	1	3	0	1	0	0	2	0	13	1	1550.87	E1BEQ4	E1BEQ4	129	141	yes	yes	3	0.013828	78.548	matching	matching	matching	MS/MS	matching	matching	matching	matching
FVSISDLLVPK	LLEPIEQKFVSISDLL	ISDLLVPKDLGTESQI	K	F	V	P	K	D	0	0	0	1	0	0	0	0	0	1	2	1	0	1	1	2	0	0	0	2	0	11	0	1216.71	P50397	P50397	380	390	yes	yes	2	5.8473e-07	136.5	matching	matching	matching	matching	matching	MS/MS	matching	matching
FVSLEDVQAK	MKQTNSFKFVSLEDVQ	SLEDVQAKILEIPYKG	K	F	V	A	K	I	1	0	0	1	0	1	1	0	0	0	1	1	0	1	0	1	0	0	0	2	0	10	0	1134.59	A6QPZ4;G5E537	A6QPZ4	169	178	no	no	2	1.0957e-104	206.73	matching	matching	MS/MS	matching	MS/MS	matching	matching	matching
FVSSPFSLDLSK	EAELTSWRFVSSPFSL	PFSLDLSKTKQQLIPG	R	F	V	S	K	T	0	0	0	1	0	0	0	0	0	0	2	1	0	2	1	4	0	0	0	1	0	12	0	1325.69	F1MVK1	F1MVK1	355	366	yes	yes	2	0.0041659	102.97	matching	matching	matching	matching	matching	matching	matching	matching
FVTVVATFGNVQVEK	LKSDKGHKFVTVVATF	FGNVQVEKVVLISLQS	K	F	V	E	K	V	1	0	1	0	0	1	1	1	0	0	0	1	0	2	0	0	2	0	0	5	0	15	0	1636.88	Q2UVX4;CON__Q2UVX4;G3X7A5	Q2UVX4	104	118	yes	no	2	0	326.57	MS/MS	MS/MS	matching	MS/MS	MS/MS	matching	MS/MS	matching
FWQPGPMTLPYDGSDEDFEETK				F	W	T	K		0	0	0	3	0	1	3	2	0	0	1	1	1	2	3	1	2	1	1	0	0	22	0	2588.11		REV__F1MC39			yes	yes	5	0.001071	9.7805	matching	matching	MS/MS	matching	matching	matching	matching	matching
FWSPDVPK	DILCSENKFWSPDVPK	FWSPDVPKCEKVSAEV	K	F	W	P	K	C	0	0	0	1	0	0	0	0	0	0	0	1	0	1	2	1	0	1	0	1	0	8	0	974.486	G3N0S9;CON__ENSEMBL:ENSBTAP00000034412	G3N0S9	134	141	yes	no	2	0.024703	76.478	matching	matching	matching	matching	matching	MS/MS	matching	matching
FWTFPEVLR	NSTVSSERFWTFPEVL	WTFPEVLRDGLWSASS	R	F	W	L	R	D	0	1	0	0	0	0	1	0	0	0	1	0	0	2	1	0	1	1	0	1	0	9	0	1193.62	CON__Q1RMK2;G5E5T5	CON__Q1RMK2	196	204	yes	no	2	1.522e-24	153.24	matching	matching	matching	matching	matching	MS/MS	matching	matching
FWVYPPEK	VLLIKGDKFWVYPPEK	FWVYPPEKGEEYPKLL	K	F	W	E	K	G	0	0	0	0	0	0	1	0	0	0	0	1	0	1	2	0	0	1	1	1	0	8	0	1064.53	Q3SZV7;CON__Q3SZV7	Q3SZV7	118	125	yes	no	2	0.022982	81.296	matching	matching	matching	matching	matching	MS/MS	matching	matching
FWVYPPEKGEEYPK	VLLIKGDKFWVYPPEK	EKGEEYPKLLQEKFPG	K	F	W	P	K	L	0	0	0	0	0	0	3	1	0	0	0	2	0	1	3	0	0	1	2	1	0	14	1	1767.85	Q3SZV7;CON__Q3SZV7	Q3SZV7	118	131	yes	no	2;3	0.0011086	110.25	matching	matching	matching	matching	matching	matching	matching	matching
FWWENPGVFTEK	QQIRDGDRFWWENPGV	NPGVFTEKQRDSLQKV	R	F	W	E	K	Q	0	0	1	0	0	0	2	1	0	0	0	1	0	2	1	0	1	2	0	1	0	12	0	1538.72	P80025;G3MXZ0	P80025	645	656	yes	no	2	2.1441e-61	166.6	matching	matching	matching	matching	matching	MS/MS	matching	matching
FYAENPTSGSTPQGI	NPNEEVARFYAENPTS	SGSTPQGI________	R	F	Y	G	I	-	1	0	1	0	0	1	1	2	0	1	0	0	0	1	2	2	2	0	1	0	0	15	0	1567.72	P02702	P02702	227	241	yes	yes	2	3.1764e-99	184	MS/MS	MS/MS	MS/MS	MS/MS	MS/MS	matching	matching	MS/MS
FYEAYK	KWPLLFSRFYEAYKFS	SRFYEAYKFSGPNLPK	R	F	Y	Y	K	F	1	0	0	0	0	0	1	0	0	0	0	1	0	1	0	0	0	0	2	0	0	6	0	819.38	F1MHG0	F1MHG0	1472	1477	yes	yes	2	2.7944e-07	99.511	MS/MS	MS/MS	matching	matching	matching	matching	MS/MS	MS/MS
FYHPDKEDGMLSK	NLDETCIRFYHPDKED	KEDGMLSKLCHKDTCR	R	F	Y	S	K	L	0	0	0	2	0	0	1	1	1	0	1	2	1	1	1	1	0	0	1	0	0	13	1	1565.72	Q2UVX4;CON__Q2UVX4;G3X7A5	Q2UVX4	1490	1502	yes	no	2;3	1.9437e-07	141.34	MS/MS	MS/MS	matching	matching	matching	MS/MS	matching	MS/MS
FYLASVESADFK	EYLDNVQKFYLASVES	SVESADFKNAAEESRK	K	F	Y	F	K	N	2	0	0	1	0	0	1	0	0	0	1	1	0	2	0	2	0	0	1	1	0	12	0	1375.67	E1B8B5;A6QPZ4;G3X894	A6QPZ4	74	85	no	no	2	0	241.39	matching	matching	matching	matching	MS/MS	MS/MS	matching	matching
FYLTVLK	LTLSFFFKFYLTVLKK	KFYLTVLKKLGKDSKD	K	F	Y	L	K	K	0	0	0	0	0	0	0	0	0	0	2	1	0	1	0	0	1	0	1	1	0	7	0	882.521	P80457;F1MUT3	P80457	519	525	yes	no	2	2.661e-11	138.24	matching	matching	matching	matching	matching	matching	matching	matching
FYNQVSTPLLR	DTSVQLKKFYNQVSTP	QVSTPLLRNVQFNYPQ	K	F	Y	L	R	N	0	1	1	0	0	1	0	0	0	0	2	0	0	1	1	1	1	0	1	1	0	11	0	1336.71	F1MNW4;CON__Q9TRI1	F1MNW4	489	499	yes	no	2	0.00057554	138.63	matching	matching	matching	matching	matching	matching	matching	matching
FYPEDVAEELIQDITQK	LQFKFRAKFYPEDVAE	LIQDITQKLFFLQVKE	K	F	Y	Q	K	L	1	0	0	2	0	2	3	0	0	2	1	1	0	1	1	0	1	0	1	1	0	17	0	2036.99	P31976	P31976	84	100	yes	yes	2;3	1.1479e-171	194.01	matching	matching	matching	matching	MS/MS	MS/MS	MS/MS	matching
FYPEDVSEELIQDITQR	LLFKFRAKFYPEDVSE	LIQDITQRLFFLQVKE	K	F	Y	Q	R	L	0	1	0	2	0	2	3	0	0	2	1	0	0	1	1	1	1	0	1	1	0	17	0	2081	Q2HJ49	Q2HJ49	84	100	yes	yes	3	1.075e-147	187.08	matching	matching	matching	matching	MS/MS	matching	matching	matching
FYQIKTDHANDVWIMGRK	AAGFNVNKFYQIKTDH	DVWIMGRKEPESYDGI	K	F	Y	R	K	E	1	1	1	2	0	1	0	1	1	2	0	2	1	1	0	0	1	1	1	1	0	18	2	2221.11	E1BM13	E1BM13	239	256	yes	yes	3	0.0083835	70.134	matching	matching	matching	matching	matching	matching	matching	matching
FYSFEK	LSCHFPCKFYSFEKYW	CKFYSFEKYWCKWSNR	K	F	Y	E	K	Y	0	0	0	0	0	0	1	0	0	0	0	1	0	2	0	1	0	0	1	0	0	6	0	819.38	P81265;F6PQI6;F1MR22;G5E6M1	P81265	487	492	yes	no	2	1.5415e-05	94.163	matching	MS/MS	matching	matching	matching	matching	matching	matching
FYYIDDPDGLK	VQLEPEEKFYYIDDPD	IDDPDGLKVNIIARFL	K	F	Y	L	K	V	0	0	0	3	0	0	0	1	0	1	1	1	0	1	1	0	0	0	2	0	0	11	0	1344.62	Q2UVX4;CON__Q2UVX4;G3X7A5	Q2UVX4	241	251	yes	no	2	1.9555e-05	141.88	MS/MS	MS/MS	matching	MS/MS	MS/MS	matching	MS/MS	MS/MS
GAAQNIIPASTGAAK	GKLWRDGRGAAQNIIP	PASTGAAKAVGKVIPE	R	G	A	A	K	A	5	0	1	0	0	1	0	2	0	2	0	1	0	0	1	1	1	0	0	0	0	15	0	1368.74	P10096	P10096	199	213	yes	yes	2	4.0526e-53	162.88	matching	matching	matching	matching	matching	MS/MS	matching	matching
GAEAANVTGPGGVPVQGSK	FDVVEGEKGAEAANVT	GVPVQGSKYAADRNHY	K	G	A	S	K	Y	3	0	1	0	0	1	1	5	0	0	0	1	0	0	2	1	1	0	0	3	0	19	0	1694.86	P67808;F1MZ92	P67808	119	137	yes	no	2	0.00047562	80.236	matching	matching	matching	matching	matching	matching	matching	matching
GAEEMETVIPVDVMR	RALVILAKGAEEMETV	VIPVDVMRRAGIKVTV	K	G	A	M	R	R	1	1	0	1	0	0	3	1	0	1	0	0	2	0	1	0	1	0	0	3	0	15	0	1674.8	Q5E946	Q5E946	13	27	yes	yes	2	6.6444e-05	122.33	matching	matching	matching	MS/MS	MS/MS	MS/MS	matching	matching
GAEEQLVPR	GVDFQLRRGAEEQLVP	AEEQLVPRASTSPDRV	R	G	A	P	R	A	1	1	0	0	0	1	2	1	0	0	1	0	0	0	1	0	0	0	0	1	0	9	0	997.519	Q2KJF1;CON__Q2KJF1	Q2KJF1	249	257	yes	no	2	5.9355e-09	135.43	MS/MS	MS/MS	matching	MS/MS	MS/MS	MS/MS	MS/MS	MS/MS
GAILGTEASIILGQEQDAFAGGFDR	RMRKSLEKGAILGTEA	AFAGGFDRNQCLVGDI	K	G	A	D	R	N	4	1	0	2	0	2	2	5	0	3	2	0	0	2	0	1	1	0	0	0	0	25	0	2535.26	C4T8B4	C4T8B4	143	167	yes	yes	2;3	2.5214e-59	140.47	matching	matching	matching	matching	MS/MS	MS/MS	matching	matching
GATCHNSIYEQSCEAYK	NCANTGYRGATCHNSI	EQSCEAYKHKGNTSGF	R	G	A	Y	K	H	2	0	1	0	2	1	2	1	1	1	0	1	0	0	0	2	1	0	2	0	0	17	0	2016.83	G5E5W4	G5E5W4	565	581	yes	yes	2	0.0013695	97.223	MS/MS	MS/MS	MS/MS	MS/MS	matching	matching	MS/MS	matching
GATEITTTITK	TEVELTGKGATEITTT	EITTTITKLSFVTVDS	K	G	A	T	K	L	1	0	0	0	0	0	1	1	0	2	0	1	0	0	0	0	5	0	0	0	0	11	0	1134.61	Q7SIH1;CON__ENSEMBL:ENSBTAP00000024146	Q7SIH1	339	349	yes	no	2	9.7849e-91	199.68	matching	MS/MS	MS/MS	MS/MS	MS/MS	MS/MS	matching	matching
GATYNIIVEAVK	ATLTGLTRGATYNIIV	NIIVEAVKDQQRQKVR	R	G	A	V	K	D	2	0	1	0	0	0	1	1	0	2	0	1	0	0	0	0	1	0	1	2	0	12	0	1276.7	B8Y9S9;P07589;G5E5A9;B8Y9T0	B8Y9S9	2166	2177	yes	no	2	1.5031e-290	229.56	matching	MS/MS	matching	MS/MS	MS/MS	matching	matching	matching
GAVGALLVYDIAK	AITSAYYRGAVGALLV	LLVYDIAKHLTYENVE	R	G	A	A	K	H	3	0	0	1	0	0	0	2	0	1	2	1	0	0	0	0	0	0	1	2	0	13	0	1288.74	F2Z4D5;Q2TA29;Q3MHP2	F2Z4D5	83	95	yes	no	2	5.666e-06	120.87	matching	matching	matching	matching	matching	matching	MS/MS	matching
GDDITMVLILPK	QVLELPFKGDDITMVL	TMVLILPKLEKTLAKV	K	G	D	P	K	L	0	0	0	2	0	0	0	1	0	2	2	1	1	0	1	0	1	0	0	1	0	12	0	1313.73	P41361;F1MSZ6;CON__P41361	P41361	309	320	yes	no	2	4.6378e-76	188.96	matching	matching	matching	MS/MS	matching	MS/MS	matching	matching
GDEEGIPAVVIDMSGLR	LLEQVAPKGDEEGIPA	VIDMSGLREKDDIQRA	K	G	D	L	R	E	1	1	0	2	0	0	2	3	0	2	1	0	1	0	1	1	0	0	0	2	0	17	0	1756.87	F1MYX5	F1MYX5	310	326	yes	yes	2;3	1.3316e-15	139.12	matching	matching	matching	matching	matching	MS/MS	matching	matching
GDFLALDLGGTNFR	ATPDGSERGDFLALDL	DLGGTNFRVLLVRVTT	R	G	D	F	R	V	1	1	1	2	0	0	0	3	0	0	3	0	0	2	0	0	1	0	0	0	0	14	0	1494.75	E1BCS3;E1BME6	E1BCS3	536	549	yes	no	2	5.9137e-56	183.28	matching	matching	matching	matching	matching	matching	matching	matching
GDKFWVYPPEKGEEYPK	RNSVLLIKGDKFWVYP	EKGEEYPKLLQEKFPG	K	G	D	P	K	L	0	0	0	1	0	0	3	2	0	0	0	3	0	1	3	0	0	1	2	1	0	17	2	2067.99	Q3SZV7;CON__Q3SZV7	Q3SZV7	115	131	yes	no	3	0.00050814	110.84	matching	matching	matching	matching	matching	MS/MS	matching	matching
GDLGIEIPAEK	SDGIMVARGDLGIEIP	GIEIPAEKVFLAQKMM	R	G	D	E	K	V	1	0	0	1	0	0	2	2	0	2	1	1	0	0	1	0	0	0	0	0	0	11	0	1140.6	A5D984;Q1JPG7	A5D984	295	305	yes	no	2	0.0018069	105.2	matching	matching	matching	matching	matching	MS/MS	matching	matching
GDPQYLLDSNSWIEEMPSER	DGATYDLKGDPQYLLD	IEEMPSERMCQSTRHR	K	G	D	E	R	M	0	1	1	2	0	1	3	1	0	1	2	0	1	0	2	3	0	1	1	0	0	20	0	2365.05	E1BH06;CON__P01030;P01030;CON__ENSEMBL:ENSBTAP00000007350	CON__ENSEMBL:ENSBTAP00000007350	1695	1714	no	no	2;3	9.5728e-64	174.04	matching	matching	matching	matching	matching	matching	matching	matching
GDSPASSKPVSINYR	TVYAVTGRGDSPASSK	KPVSINYRTEIDKPSQ	R	G	D	Y	R	T	1	1	1	1	0	0	0	1	0	1	0	1	0	0	2	4	0	0	1	1	0	15	1	1576.78	B8Y9S9;P07589;G5E5A9;B8Y9T0	B8Y9S9	1526	1540	yes	no	3	4.9775e-06	133.98	matching	matching	matching	matching	matching	matching	matching	matching
GDSVSQGTGLAPGSPR	FGGDGHARGDSVSQGT	GLAPGSPRKPGTSSIG	R	G	D	P	R	K	1	1	0	1	0	1	0	4	0	0	1	0	0	0	2	3	1	0	0	1	0	16	0	1484.72	P02672;CON__P02672;A5PJE3	P02672	275	290	yes	no	2;3	3.5e-263	226.67	MS/MS	MS/MS	matching	matching	matching	MS/MS	matching	MS/MS
GDVAFVKDQTVIQNTDGNNNEAWAK	AFRCLVEKGDVAFVKD	NNNEAWAKNLKKENFE	K	G	D	A	K	N	3	0	4	3	0	2	1	2	0	1	0	2	0	1	0	0	2	1	0	3	0	25	1	2733.3	G3X6N3;CON__Q0IIK2;CON__Q29443;Q29443	G3X6N3	554	578	yes	no	3	7.3357e-20	131.33	matching	matching	matching	matching	matching	MS/MS	matching	matching
GDVTAEEAAGASPAK	SQSSKAPRGDVTAEEA	AAGASPAKVNGQENGH	R	G	D	A	K	V	5	0	0	1	0	0	2	2	0	0	0	1	0	0	1	1	1	0	0	1	0	15	0	1372.65	Q0VBZ9	Q0VBZ9	11	25	yes	yes	2	5.6816e-20	144.88	matching	matching	matching	matching	matching	MS/MS	matching	matching
GDYPLEAVR	MLSGETAKGDYPLEAV	DYPLEAVRMQHLIARE	K	G	D	V	R	M	1	1	0	1	0	0	1	1	0	0	1	0	0	0	1	0	0	0	1	1	0	9	0	1018.51	A5D984	A5D984	368	376	yes	yes	2	3.1222e-07	132.01	matching	matching	matching	matching	matching	matching	matching	matching
GEADALNLDGGYIYTAGK	DCIVLVLKGEADALNL	GYIYTAGKCGLVPVLA	K	G	E	G	K	C	3	0	1	2	0	0	1	4	0	1	2	1	0	0	0	0	1	0	2	0	0	18	0	1826.87	P24627	P24627	406	423	yes	yes	2;3	0	316.25	MS/MS	MS/MS	MS/MS	MS/MS	MS/MS	MS/MS	MS/MS	MS/MS
GEADAMSLDGGYLYIAGK	ECIAKIMKGEADAMSL	GYLYIAGKCGLVPVLA	K	G	E	G	K	C	3	0	0	2	0	0	1	4	0	1	2	1	1	0	0	1	0	0	2	0	0	18	0	1829.85	G3X6N3;CON__Q0IIK2;CON__Q29443;Q29443	G3X6N3	406	423	yes	no	2;3	0	252.01	matching	MS/MS	MS/MS	MS/MS	MS/MS	MS/MS	MS/MS	MS/MS
GEATAERPGEAAVASSPSK	QFSKTAAKGEATAERP	AVASSPSKANGQENGH	K	G	E	S	K	A	5	1	0	0	0	0	3	2	0	0	0	1	0	0	2	3	1	0	0	1	0	19	1	1813.88	P12624;E1B916;F1N2N5	P12624	12	30	yes	no	2;3	1.1544e-15	141.1	matching	MS/MS	matching	matching	MS/MS	MS/MS	MS/MS	MS/MS
GEEFPSMSESR	QVQWRTHRGEEFPSMS	FPSMSESRNPDEEGLF	R	G	E	S	R	N	0	1	0	0	0	0	3	1	0	0	0	0	1	1	1	3	0	0	0	0	0	11	0	1254.52	P18892;E1BHI7;F1MZQ4	P18892	182	192	yes	no	2	0.0023871	122.18	matching	matching	matching	matching	matching	matching	MS/MS	MS/MS
GEEGEMELFVSTQNAMK	HCTIAIPKGEEGEMEL	VSTQNAMKTQSFVAKM	K	G	E	M	K	T	1	0	1	0	0	1	4	2	0	0	1	1	2	1	0	1	1	0	0	1	0	17	0	1898.84	P80457;F1MUT3	P80457	755	771	yes	no	2;3	1.5067e-208	208.85	MS/MS	matching	matching	matching	matching	matching	MS/MS	MS/MS
GEELSMLVLLPNEVDGLQELEDQLTAEK	KILEIPYKGEELSMLV	EDQLTAEKLIAWTSPQ	K	G	E	E	K	L	1	0	1	2	0	2	6	2	0	0	7	1	1	0	1	1	1	0	0	2	0	28	0	3111.55	G5E537	G5E537	93	120	yes	yes	3	8.2592e-08	81.974	matching	matching	matching	matching	matching	MS/MS	matching	matching
GEELSMMVLLPNEVDGLQELEDQLTAEK	KILEIPYKGEELSMMV	EDQLTAEKLIAWTSPQ	K	G	E	E	K	L	1	0	1	2	0	2	6	2	0	0	6	1	2	0	1	1	1	0	0	2	0	28	0	3129.51	A6QPZ4	A6QPZ4	186	213	yes	yes	2;3	4.6438e-08	79.021	matching	matching	matching	MS/MS	MS/MS	MS/MS	matching	matching
GEHPGLSIGDVAK	SEYRPKIKGEHPGLSI	LSIGDVAKKLGEMWNN	K	G	E	A	K	K	1	0	0	1	0	0	1	3	1	1	1	1	0	0	1	1	0	0	0	1	0	13	0	1278.66	P10103;E1BMK2	P10103	115	127	yes	no	3	2.1155e-05	101.71	matching	matching	matching	matching	matching	matching	matching	matching
GEMMDLQHGSLFLQTPK	DVLEDKLKGEMMDLQH	SLFLQTPKIVADKDYS	K	G	E	P	K	I	0	0	0	1	0	2	1	2	1	0	3	1	2	1	1	1	1	0	0	0	0	17	0	1930.93	Q5E9B1	Q5E9B1	61	77	yes	yes	2;3	9.2523e-07	123.02	matching	matching	matching	matching	matching	MS/MS	matching	matching
GEMMDLQHGSLFLR	DVMEDKLKGEMMDLQH	QHGSLFLRTPKIVSGK	K	G	E	L	R	T	0	1	0	1	0	1	1	2	1	0	3	0	2	1	0	1	0	0	0	0	0	14	0	1632.78	P19858	P19858	60	73	yes	yes	3	0.017609	66.538	matching	matching	matching	matching	matching	matching	matching	matching
GEQIHMMHR				G	E	H	R		0	1	0	0	0	1	1	1	2	1	0	0	2	0	0	0	0	0	0	0	0	9	0	1137.52		REV__F1MQH2			yes	yes	2	0.043398	49.418	matching	matching	matching	matching	matching	matching	matching	matching
GEQVQLSGTVYNYR	NIPYSVVRGEQVQLSG	SGTVYNYRTSGIQFCV	R	G	E	Y	R	T	0	1	1	0	0	2	1	2	0	0	1	0	0	0	0	1	1	0	2	2	0	14	0	1612.78	F1MY85;CON__Q1A7A4	F1MY85	836	849	no	no	2	1.9835e-51	163.64	matching	matching	matching	matching	matching	matching	matching	matching
GESEAQQNHLPPTHSDSK	GDVSMTRRGESEAQQN	PPTHSDSKQQNRVLYS	R	G	E	S	K	Q	1	0	1	1	0	2	2	1	2	0	1	1	0	0	2	3	1	0	0	0	0	18	0	1960.89	E1B933	E1B933	1163	1180	yes	yes	2	0.0045315	85.28	MS/MS	matching	matching	matching	matching	matching	matching	matching
GEVFIKPQLW	QALNYEAKGEVFIKPQ	VFIKPQLW________	K	G	E	L	W	-	0	0	0	0	0	1	1	1	0	1	1	1	0	1	1	0	0	1	0	1	0	10	1	1215.67	C4T8B4	C4T8B4	215	224	yes	yes	2	0.023962	101.97	matching	matching	matching	matching	matching	matching	matching	matching
GFAPADVFVQWLQR	ASVTCLVKGFAPADVF	VFVQWLQRGEPVTKSK	K	G	F	Q	R	G	2	1	0	1	0	2	0	1	0	0	1	0	0	2	1	0	0	1	0	2	0	14	0	1632.84	CON__Q1RMK2;G5E513	CON__Q1RMK2	499	512	yes	no	2;3	1.8962e-51	169.79	matching	MS/MS	matching	matching	matching	MS/MS	MS/MS	MS/MS
GFESPSDNSSAVLLQWHEK	LLMKYIYKGFESPSDN	VLLQWHEKALAAGGVG	K	G	F	E	K	A	1	0	1	1	0	1	2	1	1	0	2	1	0	1	1	4	0	1	0	1	0	19	0	2130	Q3SYX9;G3MXC8	Q3SYX9	113	131	yes	no	3	0.035853	44.662	matching	matching	matching	matching	matching	matching	matching	matching
GFFPEIR	KITYECKKGFFPEIRG	KGFFPEIRGTDATCTR	K	G	F	I	R	G	0	1	0	0	0	0	1	1	0	1	0	0	0	2	1	0	0	0	0	0	0	7	0	864.449	Q28085;CON__Q28085	Q28085	297	303	yes	no	2	0.021701	70.912	matching	matching	matching	matching	matching	matching	matching	matching
GFGFVTFDDHDPVDK	DRQSGKKRGFGFVTFD	DDHDPVDKIVLQKYHT	R	G	F	D	K	I	0	0	0	4	0	0	0	2	1	0	0	1	0	3	1	0	1	0	0	2	0	15	0	1694.76	Q2HJ60	Q2HJ60	142	156	yes	yes	3	0.0054667	75.088	matching	matching	matching	matching	matching	matching	matching	matching
GFGGQYGIQK	ESQRDYAKGFGGQYGI	GGQYGIQKDRVDKSAV	K	G	F	Q	K	D	0	0	0	0	0	2	0	4	0	1	0	1	0	1	0	0	0	0	1	0	0	10	0	1053.52	Q3SYW3	Q3SYW3	193	202	yes	yes	2	0.023212	83.647	matching	matching	matching	matching	matching	matching	matching	matching
GFGGVQISPPSENAVITDPSRPWWER	CERYLAPKGFGGVQIS	PSRPWWERYQPVSYKL	K	G	F	E	R	Y	1	2	1	1	0	1	2	3	0	2	0	0	0	1	4	3	1	2	0	2	0	26	1	2881.41	F1MJQ3;CON__Q3MHH8	F1MJQ3	51	76	yes	no	3	9.9403e-05	69.779	matching	matching	matching	matching	matching	matching	matching	matching
GFPIKEDFLEQSEQLFGAK	AARMYLQKGFPIKEDF	SEQLFGAKPMSLTGMK	K	G	F	A	K	P	1	0	0	1	0	2	3	2	0	1	2	2	0	3	1	1	0	0	0	0	0	19	1	2182.09	P28800;CON__P28800	P28800	172	190	yes	no	2;3	5.2508e-19	146.1	matching	matching	MS/MS	MS/MS	matching	MS/MS	matching	matching
GFQLGALDTHR	ANVACIDRGFQLGALD	LGALDTHRRDPDPNSA	R	G	F	H	R	R	1	1	0	1	0	1	0	2	1	0	2	0	0	1	0	0	1	0	0	0	0	11	0	1213.62	F1N4M7;CON__Q32PI4	F1N4M7	197	207	yes	no	2	0.040105	75.088	matching	matching	matching	matching	matching	matching	matching	matching
GFSEGLWEIENNPTVK	FGKPNKRKGFSEGLWE	IENNPTVKASGYQSSQ	K	G	F	V	K	A	0	0	2	0	0	0	3	2	0	1	1	1	0	1	1	1	1	1	0	1	0	16	0	1818.88	Q9XSK7;G3X6L4	Q9XSK7	81	96	yes	no	2	1.2594e-09	142.91	matching	matching	matching	matching	matching	matching	matching	matching
GFSVVADTPELQR	EFEKNKGKGFSVVADT	ADTPELQRIKKTQDQI	K	G	F	Q	R	I	1	1	0	1	0	1	1	1	0	0	1	0	0	1	1	1	1	0	0	2	0	13	0	1417.72	Q3B7M5	Q3B7M5	97	109	yes	yes	2	0.00011476	127.02	matching	matching	matching	matching	matching	matching	matching	matching
GGEGTSYFLDFSVR	VKRAMRARGGEGTSYF	YFLDFSVRNCSSHHFP	R	G	G	V	R	N	0	1	0	1	0	0	1	3	0	0	1	0	0	2	0	2	1	0	1	1	0	14	0	1533.71	F1MKS5;P33433	F1MKS5	191	204	yes	no	2	1.4586e-70	189.99	matching	matching	matching	matching	matching	MS/MS	matching	matching
GGETVLVSAAAGAVGSIVGQIAK	LLDICGVKGGETVLVS	SIVGQIAKLKGCKVVG	K	G	G	A	K	L	5	0	0	0	0	1	1	5	0	2	1	1	0	0	0	2	1	0	0	4	0	23	0	2054.14	F1N2W0;Q3SZJ4	F1N2W0	141	163	yes	no	2;3	2.2633e-08	104.35	matching	matching	matching	matching	matching	MS/MS	matching	matching
GGGGGGYGSGGSSYGSGGGSYGSGGGGGGGR	TISGGGSRGGGGGGYG	GGGGGGGRGSYGSGGS	R	G	G	G	R	G	0	1	0	0	0	0	0	21	0	0	0	0	0	0	0	6	0	0	3	0	0	31	0	2382.94	CON__P04264	CON__P04264	519	549	yes	yes	2	4.3348e-10	73.389	matching	matching	matching	matching	matching	matching	matching	matching
GGPGSAVSPYPTFNPSSDVEALHK	IKTVKGSKGGPGSAVS	SDVEALHKAITVKGVD	K	G	G	H	K	A	2	0	1	1	0	0	1	3	1	0	1	1	0	1	4	4	1	0	1	2	0	24	0	2413.16	P46193;F1N650	P46193	30	53	yes	no	3	3.3582e-19	118.44	matching	matching	matching	matching	matching	matching	matching	matching
GGPYLHPVGLELLVDHK	GIYYNITKGGPYLHPV	LELLVDHKALDPADWT	K	G	G	H	K	A	0	0	0	1	0	0	1	3	2	0	4	1	0	0	2	0	0	0	1	2	0	17	0	1843	Q29437	Q29437	235	251	yes	yes	3;4	2.6593e-11	147.39	matching	matching	matching	matching	matching	MS/MS	matching	matching
GGSGGSHGGGSGFGGESGGSYGGGEEASGSGGGYGGGSGK	YGGGSGSRGGSGGSHG	GYGGGSGKSSHS____	R	G	G	G	K	S	1	0	0	0	0	0	3	23	1	0	0	1	0	1	0	8	0	0	2	0	0	40	0	3222.27	CON__P35527	CON__P35527	580	619	yes	yes	3	2.4888e-78	116.76	matching	matching	matching	matching	matching	matching	matching	matching
GGTLGTPQTGSENDALYEYLR	ASEDCISRGGTLGTPQ	DALYEYLRQSVGSEAE	R	G	G	L	R	Q	1	1	1	1	0	1	2	4	0	0	3	0	0	0	1	1	3	0	2	0	0	21	0	2241.05	Q2KIS7;CON__Q2KIS7	Q2KIS7	102	122	yes	no	2	2.418e-72	174.7	matching	matching	MS/MS	MS/MS	MS/MS	MS/MS	MS/MS	matching
GGVDDEVTLSAYITIALLEMPLPVTHPVVR	TLLNNAIKGGVDDEVT	PVTHPVVRNALFCLDS	K	G	G	V	R	N	2	1	0	2	0	0	2	2	1	2	4	0	1	0	3	1	3	0	1	5	0	30	0	3204.71	Q7SIH1;CON__ENSEMBL:ENSBTAP00000024146	Q7SIH1	1130	1159	yes	no	3;4	3.7194e-32	111.3	matching	matching	matching	MS/MS	matching	MS/MS	matching	matching
GGVEGYGCVVVKQGGFMMDTRK				G	G	R	K		0	1	0	1	1	1	1	6	0	0	0	2	2	1	0	0	1	0	1	4	0	22	2	2374.12		REV__A6QLP2			yes	yes	3	0.015199	42.123	matching	matching	matching	matching	matching	matching	matching	matching
GGVGTLSQTNPRSARIR	EPYWEPAKGGVGTLSQ	NPRSARIRNPVDNCPK	K	G	G	I	R	N	1	3	1	0	0	1	0	3	0	1	1	0	0	0	1	2	2	0	0	1	0	17	2	1768.97	F1MTZ9	F1MTZ9	363	379	yes	yes	3	0.0036235	88.561	matching	matching	matching	matching	matching	matching	matching	MS/MS
GGWTVIQNR	YCDMKTEKGGWTVIQN	GWTVIQNRQDGSVDFG	K	G	G	N	R	Q	0	1	1	0	0	1	0	2	0	1	0	0	0	0	0	0	1	1	0	1	0	9	0	1029.54	F1MAV0;CON__P02676;P02676	F1MAV0	281	289	yes	no	2	9.9306e-12	138.4	matching	MS/MS	matching	matching	matching	MS/MS	MS/MS	MS/MS
GHAAPILYAVWAEAGFLPESELLNLR	NDRFVLSKGHAAPILY	ESELLNLRKISSDLDG	K	G	H	L	R	K	5	1	1	0	0	0	3	2	1	1	5	0	0	1	2	1	0	1	1	1	0	26	0	2836.49	A7E3W4;A7Z014;Q6B855	A7E3W4	49	74	yes	no	3	0.005973	44.878	matching	matching	matching	matching	matching	matching	matching	matching
GHGDWDAAELLLPPLPPR	PARGRGGRGHGDWDAA	LLPPLPPRENAALVAR	R	G	H	P	R	E	2	1	0	2	0	0	1	2	1	0	4	0	0	0	4	0	0	1	0	0	0	18	0	1953.01	F1MX50	F1MX50	36	53	yes	yes	3	0.004024	78.191	matching	matching	matching	matching	matching	matching	MS/MS	matching
GHLFLQTDQPVYNPGQQVR	NLLFSSRRGHLFLQTD	YNPGQQVRYRVFALDQ	R	G	H	V	R	Y	0	1	1	1	0	4	0	2	1	0	2	0	0	1	2	0	1	0	1	2	0	19	0	2196.11	CON__ENSEMBL:ENSBTAP00000007350	CON__ENSEMBL:ENSBTAP00000007350	139	157	yes	yes	3	4.9338e-90	180.74	matching	matching	matching	matching	matching	matching	matching	matching
GHLFLQTDQPVYNPGQR	NLLFSSRRGHLFLQTD	PVYNPGQRVRYRVFAL	R	G	H	Q	R	V	0	1	1	1	0	3	0	2	1	0	2	0	0	1	2	0	1	0	1	1	0	17	0	1968.98	E1BH06;CON__P01030	E1BH06	138	154	yes	no	2;3	1.0268e-69	165.49	matching	matching	matching	matching	matching	matching	matching	matching
GHYTEGAELVDSVLDVVR	GAGNNWAKGHYTEGAE	DSVLDVVRKEAESCDC	K	G	H	V	R	K	1	1	0	2	0	0	2	2	1	0	2	0	0	0	0	1	1	0	1	4	0	18	0	1957.97	Q2HJ81;G3X7R7;G3N1W7;G3X7R8;Q2KJD0;Q6B856;Q3MHM5;E1BJB1;Q2T9S0	Q2KJD0	104	121	no	no	3	4.0791e-05	85.469	matching	matching	matching	matching	matching	MS/MS	matching	matching
GIETGAEDLEILPNGLAFISSGLR	LPNCKLIKGIETGAED	AFISSGLRYPGVKSFE	K	G	I	L	R	Y	2	1	1	1	0	0	3	4	0	3	4	0	0	1	1	2	1	0	0	0	0	24	0	2471.29	Q2KIW1	Q2KIW1	47	70	yes	yes	2;3	5.3048e-49	139.43	matching	matching	matching	MS/MS	MS/MS	matching	matching	matching
GIHSAIDASQTPDVVFASILAAFSK	LVEYYSKRGIHSAIDA	SILAAFSKATCKDLVM	R	G	I	S	K	A	5	0	0	2	0	1	0	1	1	3	1	1	0	2	1	4	1	0	0	2	0	25	0	2544.32	P08166	P08166	207	231	yes	yes	3	0.00026201	59.674	matching	matching	matching	matching	matching	MS/MS	matching	matching
GILAADESTGSIAK	HRIVAPGKGILAADES	ESTGSIAKRLQSIGTE	K	G	I	A	K	R	3	0	0	1	0	0	1	2	0	2	1	1	0	0	0	2	1	0	0	0	0	14	0	1331.69	A6QLL8	A6QLL8	29	42	yes	yes	2	2.2827e-79	175.21	matching	matching	matching	matching	MS/MS	MS/MS	matching	matching
GILFVGSGVSGGEDGAR	RCRDLKEKGILFVGSG	SGGEDGARYGPSLMPG	K	G	I	A	R	Y	1	1	0	1	0	0	1	6	0	1	1	0	0	1	0	2	0	0	0	2	0	17	0	1576.78	Q3ZCI4	Q3ZCI4	120	136	yes	yes	2	8.0331e-33	149.31	matching	matching	matching	matching	matching	matching	matching	matching
GIPEFYDYDVALVR	DLNAKKAKGIPEFYDY	DYDVALVRLKEKLKYE	K	G	I	V	R	L	1	1	0	2	0	0	1	1	0	1	1	0	0	1	1	0	0	0	2	2	0	14	0	1655.82	CON__Q3KUS7;P81187	CON__Q3KUS7	567	580	yes	no	2;3	4.7739e-21	145.81	matching	MS/MS	MS/MS	MS/MS	MS/MS	MS/MS	matching	MS/MS
GISQAIEENLEPWPQAWDDSVLNGSLLLHDPSASINK	QIISPHDKGISQAIEE	DPSASINKDYFEDLKK	K	G	I	N	K	D	3	0	3	3	0	2	3	2	1	3	5	1	0	0	3	5	0	2	0	1	0	37	0	4042.99	A6QQ11	A6QQ11	206	242	yes	yes	3	0.0017513	34.543	matching	matching	matching	matching	matching	matching	matching	matching
GISQEQMNEFR	QILTRDAKGISQEQMN	QEQMNEFRASFNHFDR	K	G	I	F	R	A	0	1	1	0	0	2	2	1	0	1	0	0	1	1	0	1	0	0	0	0	0	11	0	1337.6	Q3B7N2	Q3B7N2	742	752	yes	yes	2	0.0038994	104.24	matching	matching	matching	matching	matching	matching	matching	matching
GISQEQMQEFR	QILTRDAKGISQEQMQ	QEQMQEFRASFNHFDK	K	G	I	F	R	A	0	1	0	0	0	3	2	1	0	1	0	0	1	1	0	1	0	0	0	0	0	11	0	1351.62	A5D7D1	A5D7D1	761	771	yes	yes	2	5.43e-11	142.12	matching	matching	matching	matching	matching	MS/MS	matching	matching
GIVDQSQQAYQEAFEISK	VAAGDDKKGIVDQSQQ	QEAFEISKKEMQPTHP	K	G	I	S	K	K	2	0	0	1	0	4	2	1	0	2	0	1	0	1	0	2	0	0	1	1	0	18	0	2039.98	P63103;E1BDS9	P63103	140	157	yes	no	2;3	0	256.33	matching	matching	matching	matching	MS/MS	MS/MS	matching	matching
GKFPDATETDLQELVAK	KKLAERLRGKFPDATE	DLQELVAKRSDFASKC	R	G	K	A	K	R	2	0	0	2	0	1	2	1	0	0	2	2	0	1	1	0	2	0	0	1	0	17	1	1860.95	Q3MHN5;CON__Q3MHN5;F1N5M2;CON__ENSEMBL:ENSBTAP00000018229	F1N5M2	427	443	no	no	2;3	1.2705e-51	170.42	matching	matching	matching	MS/MS	MS/MS	matching	matching	matching
GKPNTGQEQPGDSATEVPSR	ELKGGTRKGKPNTGQE	SATEVPSREPEMKEKG	K	G	K	S	R	E	1	1	1	1	0	2	2	3	0	0	0	1	0	0	3	2	2	0	0	1	0	20	1	2053.97	F1MX65;Q3MHX6	F1MX65	379	398	yes	no	2;3	1.4501e-06	99.343	MS/MS	MS/MS	matching	matching	matching	MS/MS	MS/MS	MS/MS
GKPNTGQEQPGDSATEVPSREPEMK	ELKGGTRKGKPNTGQE	PSREPEMKEKGDPEQQ	K	G	K	M	K	E	1	1	1	1	0	2	4	3	0	0	0	2	1	0	4	2	2	0	0	1	0	25	2	2668.24	F1MX65;Q3MHX6	F1MX65	379	403	yes	no	3	1.2051e-06	75.225	matching	matching	matching	matching	matching	matching	MS/MS	matching
GLDIQKVAGTWYSLAMAASDISLLDAQSAPLR	LIVTQTMKGLDIQKVA	DAQSAPLRVYVEELKP	K	G	L	L	R	V	6	1	0	3	0	2	0	2	0	2	5	1	1	0	1	4	1	1	1	1	0	32	1	3360.74	CON__P02754;P02754;G5E5H7	CON__P02754	9	40	yes	no	3	2.0958e-98	141.43	matching	matching	MS/MS	MS/MS	matching	MS/MS	MS/MS	MS/MS
GLFIIDDK	ADEGISFRGLFIIDDK	GLFIIDDKGILRQITI	R	G	L	D	K	G	0	0	0	2	0	0	0	1	0	2	1	1	0	1	0	0	0	0	0	0	0	8	0	919.501	Q5E947	Q5E947	129	136	no	no	2	0.025464	80.438	matching	matching	matching	matching	matching	matching	matching	matching
GLGDVDQLVK	ALRVIAERGLGDVDQL	GDVDQLVKCSHERSVH	R	G	L	V	K	C	0	0	0	2	0	1	0	2	0	0	2	1	0	0	0	0	0	0	0	2	0	10	0	1042.57	P11151	P11151	259	268	yes	yes	2	0.020556	89.827	matching	matching	matching	matching	matching	matching	matching	MS/MS
GLIDEVDQDFTSR	CPSGCRMKGLIDEVDQ	VDQDFTSRINKLRDSL	K	G	L	S	R	I	0	1	0	3	0	1	1	1	0	1	1	0	0	1	0	1	1	0	0	1	0	13	0	1493.7	P02672;CON__P02672;A5PJE3	P02672	75	87	yes	no	2	0	248.67	matching	MS/MS	matching	matching	matching	MS/MS	matching	matching
GLLIGEIMSAVLSQEGIDSLTR	VKRTVSIKGLLIGEIM	EGIDSLTRLPKGNAEA	K	G	L	T	R	L	1	1	0	1	0	1	2	3	0	3	4	0	1	0	0	3	1	0	0	1	0	22	0	2301.22	F1MY85;CON__Q1A7A4	F1MY85	981	1002	no	no	3	8.615e-05	88.282	matching	matching	matching	matching	matching	matching	matching	matching
GLNFDVSLEVSQDPAQASHAHVYTVDLGR	CGLGISSRGLNFDVSL	VYTVDLGRTVTINCPF	R	G	L	G	R	T	3	1	1	3	0	2	1	2	2	0	3	0	0	1	1	3	1	0	1	4	0	29	0	3124.52	P81265;F6PQI6;F1MR22	P81265	118	146	yes	no	3;4	4.3655e-42	110.27	matching	matching	matching	matching	matching	matching	MS/MS	MS/MS
GLQSGVDIGVK	LAGKAKTKGLQSGVDI	SGVDIGVKYSEKQERN	K	G	L	V	K	Y	0	0	0	1	0	1	0	3	0	1	1	1	0	0	0	1	0	0	0	2	0	11	0	1071.59	Q3SYU6;F1MHV8	Q3SYU6	135	145	yes	no	2	0.0028802	114.76	matching	matching	matching	matching	matching	matching	matching	matching
GLSAPIVR	FKCKVNNKGLSAPIVR	GLSAPIVRIISRSKGP	K	G	L	V	R	I	1	1	0	0	0	0	0	1	0	1	1	0	0	0	1	1	0	0	0	1	0	8	0	811.492	G3N0V0	G3N0V0	204	211	yes	yes	1;2	0.00094698	100.19	matching	matching	matching	matching	matching	matching	matching	matching
GLSYEEIVTQALK	AVACVAQRGLSYEEIV	EIVTQALKFFNQGRRG	R	G	L	L	K	F	1	0	0	0	0	1	2	1	0	1	2	1	0	0	0	1	1	0	1	1	0	13	0	1449.77	A5PJH7	A5PJH7	24	36	yes	yes	2	5.6519e-208	217.91	matching	matching	MS/MS	MS/MS	MS/MS	MS/MS	matching	matching
GLVGEIIK	IKPDGVQRGLVGEIIK	GLVGEIIKRFEQKGFR	R	G	L	I	K	R	0	0	0	0	0	0	1	2	0	2	1	1	0	0	0	0	0	0	0	1	0	8	0	827.512	F1MPL4;Q3T0Q4	F1MPL4	19	26	yes	no	2	0.019727	82.452	matching	matching	matching	matching	matching	matching	matching	matching
GMGQTETNPEADLFDDVITFIR	DSKLCSKKGMGQTETN	DDVITFIRGGTRKYAT	K	G	M	I	R	G	1	1	1	3	0	1	2	2	0	2	1	0	1	2	1	0	3	0	0	1	0	22	0	2468.15	Q3MHN2;CON__Q3MHN2	Q3MHN2	413	434	yes	no	2;3	1.6752e-106	163.78	matching	MS/MS	matching	MS/MS	MS/MS	MS/MS	MS/MS	matching
GMTDQDGLEPIIDKPLDDYLPLEMVGPR	PLTSMTVRGMTDQDGL	PLEMVGPRKTFMLQAS	R	G	M	P	R	K	0	1	0	5	0	1	2	3	0	2	4	1	2	0	4	0	1	0	1	1	0	28	1	3126.53	Q0VCM5;F1MMP5;CON__Q0VCM5	Q0VCM5	608	635	yes	no	3	1.5742e-17	108.49	matching	matching	matching	MS/MS	matching	matching	matching	matching
GNDVAFHFNPR	RLALDFKRGNDVAFHF	VAFHFNPRFNEDNRRV	R	G	N	P	R	F	1	1	2	1	0	0	0	1	1	0	0	0	0	2	1	0	0	0	0	1	0	11	0	1272.6	A6QLZ0	A6QLZ0	167	177	yes	yes	3	0.030746	63.426	matching	matching	matching	matching	matching	matching	matching	matching
GNLDDFFHR	WHHTFPSRGNLDDFFH	NLDDFFHRDKDDFFTR	R	G	N	H	R	D	0	1	1	2	0	0	0	1	1	0	1	0	0	2	0	0	0	0	0	0	0	9	0	1119.51	P02672;CON__P02672;A5PJE3	P02672	500	508	yes	no	2	1.8006e-74	180.67	matching	matching	matching	MS/MS	matching	MS/MS	matching	MS/MS
GNNISSGTVLSDYVGSGPPK	HFLVVNMKGNNISSGT	YVGSGPPKGTGLHRYV	K	G	N	P	K	G	0	0	2	1	0	0	0	4	0	1	1	1	0	0	2	4	1	0	1	2	0	20	0	1947.95	P13696	P13696	94	113	yes	yes	2	0.03558	62.303	matching	matching	matching	matching	matching	matching	MS/MS	matching
GNPTVEVDLFTAK	AREIFDSRGNPTVEVD	EVDLFTAKGLFRAAVP	R	G	N	A	K	G	1	0	1	1	0	0	1	1	0	0	1	1	0	1	1	0	2	0	0	2	0	13	0	1389.71	Q9XSJ4;F1MB08	Q9XSJ4	16	28	yes	no	2	2.8465e-49	160.46	matching	matching	matching	matching	matching	MS/MS	matching	matching
GNQWVAYDDQESVK	QQVPYATKGNQWVAYD	YDDQESVKNKARYLKN	K	G	N	V	K	N	1	0	1	2	0	2	1	1	0	0	0	1	0	0	0	1	0	1	1	2	0	14	0	1637.73	G3X7D2;P30922	G3X7D2	330	343	yes	no	2	3.1393e-134	191.19	matching	matching	matching	matching	matching	MS/MS	matching	MS/MS
GNQWVGYDDVESVETK	QQVPYAVKGNQWVGYD	DVESVETKVQFLKNLN	K	G	N	T	K	V	0	0	1	2	0	1	2	2	0	0	0	1	0	0	0	1	1	1	1	3	0	16	0	1824.82	E1BFD0	E1BFD0	333	348	yes	yes	2	0.01176	70.41	matching	matching	matching	matching	matching	matching	matching	matching
GNSEGNTWLTAFVLK	YSTFGEHRGNSEGNTW	WLTAFVLKSFAQARGY	R	G	N	L	K	S	1	0	2	0	0	0	1	2	0	0	2	1	0	1	0	1	2	1	0	1	0	15	0	1635.83	Q7SIH1;CON__ENSEMBL:ENSBTAP00000024146	Q7SIH1	1070	1084	yes	no	2	0	238.65	matching	matching	matching	MS/MS	matching	MS/MS	matching	matching
GNYDAAQR	ADKYFHARGNYDAAQR	GNYDAAQRGPGGAWAA	R	G	N	Q	R	G	2	1	1	1	0	1	0	1	0	0	0	0	0	0	0	0	0	0	1	0	0	8	0	893.399	F1MMW8;P35541	P35541	58	65	no	no	2	9.7531e-05	121.09	matching	matching	matching	matching	matching	matching	matching	matching
GNYDAAQRGPGGAWAAK	ADKYFHARGNYDAAQR	PGGAWAAKVISNARET	R	G	N	A	K	V	5	1	1	1	0	1	0	4	0	0	0	1	0	0	1	0	0	1	1	0	0	17	1	1688.8	F1MMW8;P35541	P35541	58	74	no	no	2	1.5344e-56	179.79	matching	matching	matching	matching	matching	matching	matching	matching
GNYVNWFQQIPGSAPR	GSSSNVGRGNYVNWFQ	QIPGSAPRTLIYGATS	R	G	N	P	R	T	1	1	2	0	0	2	0	2	0	1	0	0	0	1	2	1	0	1	1	1	0	16	0	1832.9	G5E604	G5E604	32	47	yes	yes	2	1.6522e-40	163.9	matching	MS/MS	MS/MS	matching	matching	MS/MS	matching	matching
GPAREPQVYVLAPPQEELSK	VRTISRTKGPAREPQV	PPQEELSKSTVSLTCM	K	G	P	S	K	S	2	1	0	0	0	2	3	1	0	0	2	1	0	0	4	1	0	0	1	2	0	20	1	2207.16	CON__ENSEMBL:ENSBTAP00000024462;CON__ENSEMBL:ENSBTAP00000024466	CON__ENSEMBL:ENSBTAP00000024462	311	330	yes	no	3	0.0014763	72.793	matching	matching	matching	matching	matching	matching	matching	matching
GPDFLVTEVENGGSLGSK	ISLLVKQKGPDFLVTE	NGGSLGSKKGVNLPGA	K	G	P	S	K	K	0	0	1	1	0	0	2	4	0	0	2	1	0	1	1	2	1	0	0	2	0	18	0	1804.88	A5D984	A5D984	189	206	yes	yes	2	0	227.09	matching	matching	matching	matching	matching	matching	matching	matching
GPDGLTAFEATDNQAIK	KGADKTVKGPDGLTAF	ATDNQAIKALLQ____	K	G	P	I	K	A	3	0	1	2	0	1	1	2	0	1	1	1	0	1	1	0	2	0	0	0	0	17	0	1746.84	Q3T0F7	Q3T0F7	98	114	yes	yes	2	2.4724e-86	190.19	matching	matching	matching	matching	matching	matching	matching	matching
GPEEEHLGILGPVISAEVGDTIR	SFSNQKQRGPEEEHLG	AEVGDTIRVTFHNKAA	R	G	P	I	R	V	1	1	0	1	0	0	4	4	1	3	2	0	0	0	2	1	1	0	0	2	0	23	0	2387.23	F1N076;CON__ENSEMBL:ENSBTAP00000031900	F1N076	439	461	no	no	3	1.539e-39	138.82	matching	matching	matching	matching	matching	matching	matching	MS/MS
GPFPIIV	EPVLGPVRGPFPIIV_	RGPFPIIV________	R	G	P	I	V	-	0	0	0	0	0	0	0	1	0	2	0	0	0	1	2	0	0	0	0	1	0	7	0	741.443	CON__P02666;P02666	CON__P02666	203	209	yes	no	1	0.019871	71.753	matching	matching	matching	matching	matching	matching	matching	matching
GPGEQGPTQGTNSSPTSEPK	TGDTRDAKGPGEQGPT	SSPTSEPKEE______	K	G	P	P	K	E	0	0	1	0	0	2	2	4	0	0	0	1	0	0	4	3	3	0	0	0	0	20	0	1954.89	A5PJT7	A5PJT7	496	515	yes	yes	2	0.00092057	82.859	matching	matching	matching	matching	matching	MS/MS	matching	matching
GPGGAWAAK	GNYDAAQRGPGGAWAA	PGGAWAAKVISNARET	R	G	P	A	K	V	3	0	0	0	0	0	0	3	0	0	0	1	0	0	1	0	0	1	0	0	0	9	0	813.413	F1MMW8;Q8SQ28;F1MHZ0;P35541;E1BJF9	Q8SQ28	66	74	no	no	2	0.037392	82.241	matching	matching	matching	matching	matching	MS/MS	matching	matching
GPPQEEEEEEEEEEAAKEDAEAPGLR	PSEPGSGRGPPQEEEE	DAEAPGLRDHESL___	R	G	P	L	R	D	4	1	0	1	0	1	12	2	0	0	1	1	0	0	3	0	0	0	0	0	0	26	1	2896.24	Q9XSK7;G3X6L4	Q9XSK7	209	234	yes	no	3	4.6425e-36	131.64	matching	matching	matching	matching	matching	MS/MS	matching	matching
GPSFDVQVGLHELLGHGSGKLFMQDEK	KDLYIRWKGPSFDVQV	KLFMQDEKGAFNFDQE	K	G	P	E	K	G	0	0	0	2	0	2	2	5	2	0	4	2	1	2	1	2	0	0	0	2	0	27	1	2924.45	F2Z4F5	F2Z4F5	440	466	yes	yes	4	0.016405	40.177	matching	matching	matching	matching	matching	matching	matching	matching
GPSYGLSAEVK	MSSTQFNKGPSYGLSA	YGLSAEVKNRLQSKYD	K	G	P	V	K	N	1	0	0	0	0	0	1	2	0	0	1	1	0	0	1	2	0	0	1	1	0	11	0	1106.56	Q3SYU6	Q3SYU6	9	19	no	no	2	0.0064322	107.34	matching	matching	matching	matching	matching	matching	matching	matching
GPTLTEILEGLK	AFLSLGARGPTLTEIL	TEILEGLKFNLTEIQE	R	G	P	L	K	F	0	0	0	0	0	0	2	2	0	1	3	1	0	0	1	0	2	0	0	0	0	12	0	1269.72	Q3ZEJ6;CON__A2I7N0;A2I7N0;G8JKW7	Q3ZEJ6	87	98	no	no	2	4.3022e-171	202.05	matching	MS/MS	matching	matching	MS/MS	matching	MS/MS	MS/MS
GPTVTEILEGLK	AFLSLGARGPTVTEIL	TEILEGLKFNLTETLE	R	G	P	L	K	F	0	0	0	0	0	0	2	2	0	1	2	1	0	0	1	0	2	0	0	1	0	12	0	1255.7	A6QPQ2;A0A0A0MP89	A6QPQ2	90	101	yes	no	2	2.6887e-61	165.58	matching	matching	matching	matching	MS/MS	MS/MS	matching	matching
GPVDVVVGDTDYR	LLQARGARGPVDVVVG	VVGDTDYRGFAVLYLE	R	G	P	Y	R	G	0	1	0	3	0	0	0	2	0	0	0	0	0	0	1	0	1	0	1	4	0	13	0	1390.67	A8YXZ2	A8YXZ2	121	133	yes	yes	2	0.002968	95.264	matching	matching	matching	matching	matching	matching	matching	matching
GPVKPSGGPGGGGTQTQQQMNQLK	SSQNGQLRGPVKPSGG	QQQMNQLKNTNTINNG	R	G	P	L	K	N	0	0	1	0	0	5	0	7	0	0	1	2	1	0	3	1	2	0	0	1	0	24	1	2351.17	E1BDM8	E1BDM8	23	46	yes	yes	3	0.0054616	52.754	matching	matching	matching	matching	matching	matching	matching	matching
GPVSVGIDASHSSFFLYK	LKEAVANKGPVSVGID	HSSFFLYKTGVYYDPS	K	G	P	Y	K	T	1	0	0	1	0	0	0	2	1	1	1	1	0	2	1	4	0	0	1	2	0	18	0	1909.96	P25326	P25326	246	263	yes	yes	3	0.0031054	74.141	matching	matching	matching	matching	matching	MS/MS	matching	matching
GQEDASSDRFSNADYAVSYMLR	GHHSPLFRGQEDASSD	YAVSYMLRLGAPANKL	R	G	Q	L	R	L	3	2	1	3	0	1	1	1	0	0	1	0	1	1	0	4	0	0	2	1	0	22	1	2481.09	G3X7D2;P30922	G3X7D2	233	254	yes	no	3	0.0001303	95.988	matching	matching	matching	matching	matching	matching	matching	matching
GQGTLSVVTVYHAK	FTVKAEGKGQGTLSVV	VVTVYHAKLKGKVSCK	K	G	Q	A	K	L	1	0	0	0	0	1	0	2	1	0	1	1	0	0	0	1	2	0	1	3	0	14	0	1458.78	Q2UVX4;CON__Q2UVX4;G3X7A5	Q2UVX4	1337	1350	yes	no	2;3	1.5103e-78	170.74	MS/MS	matching	matching	matching	MS/MS	matching	matching	MS/MS
GQSYSVNVTFTSNTQSQSSK	TQPCKLHRGQSYSVNV	NTQSQSSKAVVHGIVM	R	G	Q	S	K	A	0	0	2	0	0	3	0	1	0	0	0	1	0	1	0	6	3	0	1	2	0	20	0	2148.99	P79345	P79345	52	71	yes	yes	2	0.00010535	91.964	matching	matching	matching	matching	matching	matching	matching	matching
GQTLLAAAESH	CAGPEALKGQTLLAAA	LLAAAESH________	K	G	Q	S	H	-	3	0	0	0	0	1	1	1	1	0	2	0	0	0	0	1	1	0	0	0	0	11	0	1096.55	Q2KIF2;CON__Q2KIF2	Q2KIF2	336	346	yes	no	2	7.5679e-74	182.92	matching	matching	matching	matching	matching	MS/MS	matching	matching
GQVLNSDELQELYDGLK	HTGYSHWKGQVLNSDE	QELYDGLKLNSVNQYD	K	G	Q	L	K	L	0	0	1	2	0	2	2	2	0	0	4	1	0	0	0	1	0	0	1	1	0	17	0	1919.95	Q0II59	Q0II59	54	70	yes	yes	2	0.00077034	100.69	matching	matching	matching	matching	matching	MS/MS	matching	matching
GRPFADVLSLSDGPPGK	ISTQEGVRGRPFADVL	LSDGPPGKGSGVPYFY	R	G	R	G	K	G	1	1	0	2	0	0	0	3	0	0	2	1	0	1	3	2	0	0	0	1	0	17	1	1711.89	F1MX50	F1MX50	83	99	yes	yes	3	6.2053e-10	135.61	matching	matching	matching	matching	matching	MS/MS	MS/MS	matching
GRQNQVQDNENVVNEYSSHLEK	TLLKNMWKGRQNQVQD	EYSSHLEKHQLYIDET	K	G	R	E	K	H	0	1	4	1	0	3	3	1	1	0	1	1	0	0	0	2	0	0	1	3	0	22	1	2586.21	F1MAV0;CON__P02676;P02676	F1MAV0	161	182	yes	no	3	0.00036218	105.79	matching	matching	matching	matching	matching	matching	matching	matching
GSELWLGVDALGLNIYEQNDR	YFSIKNKKGSELWLGV	NIYEQNDRLTPKIGFP	K	G	S	D	R	L	1	1	2	2	0	1	2	3	0	1	4	0	0	0	0	1	0	1	1	1	0	21	0	2361.16	Q2HJ49	Q2HJ49	213	233	yes	yes	3	0.023662	48.968	matching	matching	matching	matching	matching	matching	matching	matching
GSFPWQAK	IGGSLDAKGSFPWQAK	GSFPWQAKMVSQHNLI	K	G	S	A	K	M	1	0	0	0	0	1	0	1	0	0	0	1	0	1	1	1	0	1	0	0	0	8	0	919.455	Q2TBU0;G3X6K8	Q2TBU0	166	173	yes	no	1;2	0.00021663	127.46	matching	matching	matching	matching	matching	MS/MS	matching	matching
GSGGTAEHPFTVEEFVLPK	SYKVVVQKGSGGTAEH	VEEFVLPKFEVQVRMP	K	G	S	P	K	F	1	0	0	0	0	0	3	3	1	0	1	1	0	2	2	1	2	0	0	2	0	19	0	2000.98	Q7SIH1;CON__ENSEMBL:ENSBTAP00000024146	Q7SIH1	210	228	yes	no	2;3	1.1747e-18	133.9	matching	MS/MS	MS/MS	MS/MS	MS/MS	MS/MS	matching	MS/MS
GSKDLSRELDLEMITEEEQEK	KSELPGNRGSKDLSRE	ITEEEQEKLDEDENNH	R	G	S	E	K	L	0	1	0	2	0	1	6	1	0	1	3	2	1	0	0	2	1	0	0	0	0	21	2	2478.18	F1N6M0	F1N6M0	80	100	yes	yes	4	0.0014504	77.505	matching	matching	matching	matching	matching	matching	matching	matching
GSLFFNPK	SPFSSFPRGSLFFNPK	GSLFFNPKSRFARNVM	R	G	S	P	K	S	0	0	1	0	0	0	0	1	0	0	1	1	0	2	1	1	0	0	0	0	0	8	0	908.476	P17697;CON__P17697	P17697	209	216	yes	no	2	4.7753e-13	138.54	matching	MS/MS	matching	matching	matching	MS/MS	MS/MS	MS/MS
GSLVQASPANLEAAR	GSAVQSWKGSLVQASP	PANLEAARNFVQQFSL	K	G	S	A	R	N	4	1	1	0	0	1	1	1	0	0	2	0	0	0	1	2	0	0	0	1	0	15	0	1482.78	Q0VCM5;F1MMP5;CON__Q0VCM5	Q0VCM5	337	351	yes	no	2	1.5206e-145	190.34	matching	matching	matching	matching	matching	MS/MS	matching	matching
GSNFQLDQLQGR	YAVAVVKKGSNFQLDQ	QLDQLQGRKSCHTGLG	K	G	S	G	R	K	0	1	1	1	0	3	0	2	0	0	2	0	0	1	0	1	0	0	0	0	0	12	0	1361.67	P24627	P24627	120	131	yes	yes	1;2;3	0	236.08	MS/MS	MS/MS	MS/MS	MS/MS	MS/MS	MS/MS	matching	MS/MS
GSNFQLDQLQGRK	YAVAVVKKGSNFQLDQ	LDQLQGRKSCHTGLGR	K	G	S	R	K	S	0	1	1	1	0	3	0	2	0	0	2	1	0	1	0	1	0	0	0	0	0	13	1	1489.76	P24627	P24627	120	132	yes	yes	2;3	4.0439e-49	164.22	matching	matching	matching	matching	matching	MS/MS	matching	matching
GSNFQLNQLQGK	YVVAVVKKGSNFQLNQ	QLNQLQGKKSCHTGLG	K	G	S	G	K	K	0	0	2	0	0	3	0	2	0	0	2	1	0	1	0	1	0	0	0	0	0	12	0	1332.68	E1BI82;CON__Q2HJF0	CON__Q2HJF0	123	134	no	no	2	1.9296e-07	137.4	matching	MS/MS	matching	matching	MS/MS	matching	matching	MS/MS
GSTLTEILEGLK	AFLSLGARGSTLTEIL	TEILEGLKFNLTEIQE	R	G	S	L	K	F	0	0	0	0	0	0	2	2	0	1	3	1	0	0	0	1	2	0	0	0	0	12	0	1259.7	Q9TTE1;CON__Q9TTE1;A2I7M9	Q9TTE1	87	98	yes	no	2	7.0164e-147	193.62	MS/MS	matching	matching	matching	matching	MS/MS	MS/MS	MS/MS
GSVQYLPDWDK	SPTKAVPKGSVQYLPD	QYLPDWDKKREGSQEK	K	G	S	D	K	K	0	0	0	2	0	1	0	1	0	0	1	1	0	0	1	1	0	1	1	1	0	11	0	1306.62	Q58D62;CON__Q58D62	Q58D62	305	315	yes	no	2	1.6614e-10	138.99	matching	matching	matching	matching	matching	MS/MS	matching	matching
GSVSDEEMLELR	________________	DEEMLELREAFAKVDT	R	G	S	L	R	E	0	1	0	1	0	0	3	1	0	0	2	0	1	0	0	2	0	0	0	1	0	12	0	1363.63	F1MYX5	F1MYX5	4	15	yes	yes	2	1.3e-173	199.12	matching	matching	matching	matching	matching	MS/MS	matching	matching
GTAFDILR	SANCIEEKGTAFDILR	GTAFDILRGESSRIPP	K	G	T	L	R	G	1	1	0	1	0	0	0	1	0	1	1	0	0	1	0	0	1	0	0	0	0	8	0	891.481	G5E5K5	G5E5K5	52	59	yes	yes	2	0.00055401	109.71	matching	matching	matching	matching	matching	MS/MS	matching	matching
GTEWVDPEDPTVIAENELLGAAAAIEAAAK	IQAAEAMKGTEWVDPE	AAIEAAAKKLEQLKPR	K	G	T	A	K	K	8	0	1	2	0	0	5	2	0	2	2	1	0	0	2	0	2	1	0	2	0	30	0	3050.51	F1MDH3	F1MDH3	2301	2330	yes	yes	3	0.0092015	36.3	matching	matching	matching	matching	matching	matching	matching	matching
GTFTYEWTVPR	SGSHVAPKGTFTYEWT	TYEWTVPREVGPTYKD	K	G	T	P	R	E	0	1	0	0	0	0	1	1	0	0	0	0	0	1	1	0	3	1	1	1	0	11	0	1355.65	F1N076;CON__ENSEMBL:ENSBTAP00000031900	F1N076	508	518	no	no	2	3.5249e-34	156.58	matching	matching	matching	matching	matching	MS/MS	matching	matching
GTPVWDLDNILK	SACHNELRGTPVWDLD	WDLDNILKFLKTHFSP	R	G	T	L	K	F	0	0	1	2	0	0	0	1	0	1	2	1	0	0	1	0	1	1	0	1	0	12	0	1369.72	F1MM32	F1MM32	519	530	yes	yes	2	2.8271e-110	186.58	matching	matching	MS/MS	matching	matching	MS/MS	matching	matching
GTSVDGHSLASSNTDFAFSLYK	VTPEEQHKGTSVDGHS	DFAFSLYKQLALKDPN	K	G	T	Y	K	Q	2	0	1	2	0	0	0	2	1	0	2	1	0	2	0	5	2	0	1	1	0	22	0	2303.07	A6QPQ2;A0A0A0MP89;A0A0A0MP88;CON__REFSEQ:XP_001252647;A0A0A0MP92	CON__REFSEQ:XP_001252647	38	59	no	no	2;3	2.5283e-281	224.8	matching	MS/MS	MS/MS	MS/MS	MS/MS	MS/MS	MS/MS	MS/MS
GTTHAVFYGFLLNGN	LDREESEKGTTHAVFY	YGFLLNGN________	K	G	T	G	N	-	1	0	2	0	0	0	0	3	1	0	2	0	0	2	0	0	2	0	1	1	0	15	0	1609.79	Q2KIX7	Q2KIX7	198	212	yes	yes	2	2.2884e-07	133.16	matching	matching	matching	matching	matching	MS/MS	matching	matching
GTTPYVQAFDSLLAGPVAEYLK	GYGDSAAKGTTPYVQA	GPVAEYLKISKEIGGD	K	G	T	L	K	I	3	0	0	1	0	1	1	2	0	0	3	1	0	1	2	1	2	0	2	2	0	22	0	2339.2	A6QLB7	A6QLB7	38	59	yes	yes	2;3	3.2022e-19	130.37	matching	matching	matching	matching	matching	MS/MS	matching	matching
GTYIPVPLVSELQSGK	GLYPQENKGTYIPVPL	VSELQSGKWGAKVVMR	K	G	T	G	K	W	0	0	0	0	0	1	1	2	0	1	2	1	0	0	2	2	1	0	1	2	0	16	0	1686.92	F1MW44;P12260	F1MW44	115	130	yes	no	2	0.013454	74.141	matching	matching	matching	matching	matching	matching	matching	matching
GVAALTSDPAVQAIVLDTASDVLDK	RSLAQAARGVAALTSD	TASDVLDKASSLIEEA	R	G	V	D	K	A	5	0	0	4	0	1	0	1	0	1	3	1	0	0	1	2	2	0	0	4	0	25	0	2468.3	F1MDH3	F1MDH3	1146	1170	yes	yes	3	5.5859e-05	73.672	matching	matching	matching	matching	matching	matching	matching	matching
GVALADFNR	DDPHQHGRGVALADFN	VALADFNRDGKVDIVY	R	G	V	N	R	D	2	1	1	1	0	0	0	1	0	0	1	0	0	1	0	0	0	0	0	1	0	9	0	961.498	F1MFI4	F1MFI4	293	301	yes	yes	2	0.041157	68.657	matching	matching	matching	matching	matching	matching	MS/MS	matching
GVDDLDFFIGDEAIEKPTYATK	QAQRRVMKGVDDLDFF	EKPTYATKWPIRHGIV	K	G	V	T	K	W	2	0	0	4	0	0	2	2	0	2	1	2	0	2	1	0	2	0	1	1	0	22	1	2443.18	F1N049;P61157	F1N049	20	41	yes	no	3	7.0963e-33	142.35	matching	matching	matching	matching	matching	MS/MS	matching	matching
GVDEATIIEILTK	LHKAITVKGVDEATII	TIIEILTKRNNAQRQQ	K	G	V	T	K	R	1	0	0	1	0	0	2	1	0	3	1	1	0	0	0	0	2	0	0	1	0	13	0	1400.78	P46193;F1N650	P46193	59	71	yes	no	2	1.031e-112	190.34	matching	matching	matching	matching	matching	MS/MS	matching	matching
GVGAAATAVTQALNELLQHVR	TEDAQLLRGVGAAATA	NELLQHVRAHATGAGP	R	G	V	V	R	A	5	1	1	0	0	2	1	2	1	0	3	0	0	0	0	0	2	0	0	3	0	21	0	2118.15	F1MDH3	F1MDH3	775	795	yes	yes	3	0.036421	38.996	matching	matching	matching	matching	matching	matching	matching	matching
GVLDTIQQVLTDR	VSACSGQRGVLDTIQQ	IQQVLTDREAYWEVKP	R	G	V	D	R	E	0	1	0	2	0	2	0	1	0	1	2	0	0	0	0	0	2	0	0	2	0	13	0	1456.79	F1MCC8	F1MCC8	268	280	yes	yes	2	0.041027	68.463	matching	matching	matching	matching	matching	matching	matching	matching
GVLEQLR	TQKTEVFRGVLEQLRW	RGVLEQLRWFAGKQVK	R	G	V	L	R	W	0	1	0	0	0	1	1	1	0	0	2	0	0	0	0	0	0	0	0	1	0	7	0	813.471	P80457;F1MUT3	P80457	329	335	yes	no	2	7.6933e-13	143	MS/MS	matching	matching	matching	matching	matching	MS/MS	MS/MS
GVLLEIEDLQVNQFK	TAARLHEKGVLLEIED	DLQVNQFKNVIFEISP	K	G	V	F	K	N	0	0	1	1	0	2	2	1	0	1	3	1	0	1	0	0	0	0	0	2	0	15	0	1743.94	F1MC48	F1MC48	1515	1529	yes	yes	2	0.037286	85.909	matching	matching	matching	matching	matching	matching	matching	matching
GVNLPGAAVDLPAVSEK	GGSLGSKKGVNLPGAA	DLPAVSEKDIQDLKFG	K	G	V	E	K	D	3	0	1	1	0	0	1	2	0	0	2	1	0	0	2	1	0	0	0	3	0	17	0	1635.88	A5D984	A5D984	208	224	yes	yes	2	1.2311e-15	139.46	matching	matching	matching	matching	matching	MS/MS	matching	matching
GVQVETISPGDGR	________________	TISPGDGRTFPKRGQT	M	G	V	G	R	T	0	1	0	1	0	1	1	3	0	1	0	0	0	0	1	1	1	0	0	2	0	13	0	1313.66	P18203;Q2NKS8	P18203	2	14	yes	no	2	7.9742e-20	148.85	matching	matching	matching	matching	matching	MS/MS	matching	matching
GVTFLLR	LLCLSGLRGVTFLLRL	RGVTFLLRLEGEDQFL	R	G	V	L	R	L	0	1	0	0	0	0	0	1	0	0	2	0	0	1	0	0	1	0	0	1	0	7	0	804.486	Q2KJF1;CON__Q2KJF1	Q2KJF1	148	154	yes	no	2	0.00048299	114.59	matching	matching	matching	MS/MS	MS/MS	matching	matching	matching
GVVDSEDLPLNISR	PEYLNFIRGVVDSEDL	DLPLNISREMLQQSKI	R	G	V	S	R	E	0	1	1	2	0	0	1	1	0	1	2	0	0	0	1	2	0	0	0	2	0	14	0	1512.78	Q76LV2;Q76LV1;G5E507	Q76LV2	388	401	no	no	2	8.3051e-96	188.12	matching	matching	matching	matching	matching	matching	matching	matching
GVVPLAGTDGETTTQGLDGLSER	VVGIKVDKGVVPLAGT	GLDGLSERCAQYKKDG	K	G	V	E	R	C	1	1	0	2	0	1	2	5	0	0	3	0	0	0	1	1	4	0	0	2	0	23	0	2272.12	Q3ZBY4	Q3ZBY4	112	134	yes	yes	2	3.6888e-11	112.64	matching	matching	matching	matching	matching	matching	matching	matching
GVVPLAGTNGETTTQGLDGLSER	VVGIKVDKGVVPLAGT	GLDGLSERCAQYKKDG	K	G	V	E	R	C	1	1	1	1	0	1	2	5	0	0	3	0	0	0	1	1	4	0	0	2	0	23	0	2271.13	A6QLL8	A6QLL8	112	134	yes	yes	2;3	1.3227e-42	145.72	matching	matching	matching	matching	matching	MS/MS	matching	matching
GVYTSDVFDLFPGTYQTVEMTPK	HSFQYQHRGVYTSDVF	QTVEMTPKTPGIWLLH	R	G	V	P	K	T	0	0	0	2	0	1	1	2	0	0	1	1	1	2	2	1	4	0	2	3	0	23	0	2594.23	F1N076;CON__ENSEMBL:ENSBTAP00000031900	F1N076	1004	1026	no	no	2;3	1.4698e-116	174.2	matching	MS/MS	matching	MS/MS	MS/MS	MS/MS	matching	matching
GWEEGVAQMSVGQR	LGKQEVIRGWEEGVAQ	AQMSVGQRAKLTISPD	R	G	W	Q	R	A	1	1	0	0	0	2	2	3	0	0	0	0	1	0	0	1	0	1	0	2	0	14	0	1532.7	P18203	P18203	59	72	yes	yes	2	3.3356e-210	196.37	matching	matching	matching	matching	matching	matching	matching	matching
GWQDVTATSAYK	ELKQNIAKGWQDVTAT	VTATSAYKKTSETLSQ	K	G	W	Y	K	K	2	0	0	1	0	1	0	1	0	0	0	1	0	0	0	1	2	1	1	1	0	12	0	1325.63	F1MBV6;Q3ZCA8;E1BE76	F1MBV6	86	97	yes	no	2	4.1593e-36	137.09	matching	matching	matching	matching	matching	matching	matching	matching
GYADIVQLLLEK	ALHAAAWKGYADIVQL	IVQLLLEKGARTDLRN	K	G	Y	E	K	G	1	0	0	1	0	1	1	1	0	1	3	1	0	0	0	0	0	0	1	1	0	12	0	1360.76	Q8MJ50	Q8MJ50	151	162	yes	yes	2	6.2557e-48	161.87	matching	matching	matching	matching	matching	matching	matching	matching
GYDIAQISR	AGKIAIDRGYDIAQIS	YDIAQISRHLDFISLL	R	G	Y	S	R	H	1	1	0	1	0	1	0	1	0	2	0	0	0	0	0	1	0	0	1	0	0	9	0	1021.52	G3X7D2;P30922	G3X7D2	196	204	yes	no	2	1.6534e-09	137.46	matching	matching	matching	matching	MS/MS	MS/MS	matching	MS/MS
GYEEWLLNEIR	QHLEQAEKGYEEWLLN	EWLLNEIRRLERLDHL	K	G	Y	I	R	R	0	1	1	0	0	0	3	1	0	1	2	0	0	0	0	0	0	1	1	0	0	11	0	1420.7	Q3B7N2;Q3ZC55;F1MRD4;A5D7D1	A5D7D1	396	406	no	no	2	3.185e-282	224.42	matching	matching	matching	matching	matching	MS/MS	matching	matching
GYIFIDEAHITEALTWLAQK	LKSFAQARGYIFIDEA	ALTWLAQKQKSNGCFR	R	G	Y	Q	K	Q	3	0	0	1	0	1	2	1	1	3	2	1	0	1	0	0	2	1	1	0	0	20	0	2318.19	Q7SIH1;CON__ENSEMBL:ENSBTAP00000024146	Q7SIH1	1091	1110	yes	no	3	5.4994e-35	148.41	matching	matching	matching	MS/MS	matching	MS/MS	matching	matching
GYLAVAVVK	SCKNTPEKGYLAVAVV	YLAVAVVKTSDANINW	K	G	Y	V	K	T	2	0	0	0	0	0	0	1	0	0	1	1	0	0	0	0	0	0	1	3	0	9	0	918.554	G3X6N3;CON__Q0IIK2;CON__Q29443;Q29443	G3X6N3	448	456	yes	no	2	9.7433e-13	147.52	matching	MS/MS	MS/MS	MS/MS	MS/MS	MS/MS	MS/MS	matching
GYLTPNYEVK	LLACGAARGYLTPNYE	LTPNYEVKGHRDVQQT	R	G	Y	V	K	G	0	0	1	0	0	0	1	1	0	0	1	1	0	0	1	0	1	0	2	1	0	10	0	1182.59	Q8SPP7	Q8SPP7	153	162	yes	yes	2	5.2235e-12	152.54	matching	matching	MS/MS	MS/MS	MS/MS	MS/MS	matching	matching
GYSFTTTAER	LMKILTERGYSFTTTA	SFTTTAEREIVRDIKE	R	G	Y	E	R	E	1	1	0	0	0	0	1	1	0	0	0	0	0	1	0	1	3	0	1	0	0	10	0	1131.52	P63258;P60712;F1MRD0	P63258	197	206	yes	no	2	3.7705e-181	197.21	matching	MS/MS	matching	MS/MS	MS/MS	MS/MS	MS/MS	matching
GYTQQLAFR	ESLELIRKGYTQQLAF	YTQQLAFRQKSSAYAA	K	G	Y	F	R	Q	1	1	0	0	0	2	0	1	0	0	1	0	0	1	0	0	1	0	1	0	0	9	0	1082.55	Q2UVX4;CON__Q2UVX4;G3X7A5	Q2UVX4	1051	1059	yes	no	2	6.1617e-140	195.57	matching	matching	matching	matching	matching	MS/MS	matching	matching
GYTSWAIGLSVADLAESIMK	AYEVIKLKGYTSWAIG	DLAESIMKNLRRVHPI	K	G	Y	M	K	N	3	0	0	1	0	0	1	2	0	2	2	1	1	0	0	3	1	1	1	1	0	20	0	2111.06	P19858	P19858	246	265	yes	yes	2	0.018806	56.017	matching	matching	matching	matching	matching	matching	matching	matching
HEAFESDLAAHQDR	DIKALIRKHEAFESDL	DLAAHQDRVEQIAAIA	K	H	E	D	R	V	3	1	0	2	0	1	2	0	2	0	1	0	0	1	0	1	0	0	0	0	0	14	0	1624.72	Q3B7N2;Q3ZC55;F1MRD4;Q0III9;G3X7I1;A5D7D1	A5D7D1	456	469	no	no	3	0.00023826	110.8	matching	matching	matching	matching	matching	MS/MS	matching	matching
HFDGSYSTFGEHR	YQRQLLYKHFDGSYST	YSTFGEHRGNSEGNTW	K	H	F	H	R	G	0	1	0	1	0	0	1	2	2	0	0	0	0	2	0	2	1	0	1	0	0	13	0	1538.65	Q7SIH1;CON__ENSEMBL:ENSBTAP00000024146	Q7SIH1	1057	1069	yes	no	2;3	2.249e-63	182.37	matching	MS/MS	MS/MS	MS/MS	matching	matching	matching	matching
HFHYVNQNQQAQESSPPGKKR	QTRVEKNRHFHYVNQN	SSPPGKKRLAQLYQQT	R	H	F	K	R	L	1	1	2	0	0	4	1	1	2	0	0	2	0	1	2	2	0	0	1	1	0	21	2	2479.21	E1B9W6	E1B9W6	1185	1205	yes	yes	2	0.051955	40.952	matching	matching	matching	matching	matching	matching	matching	matching
HFPPAAATDTAADAHDPARPGAK	EDGGQVLRHFPPAAAT	DPARPGAKVSESLSLK	R	H	F	A	K	V	8	1	0	3	0	0	0	1	2	0	0	1	0	1	4	0	2	0	0	0	0	23	1	2284.1	Q7SIH1	Q7SIH1	941	963	yes	yes	4	0.0019494	74.993	matching	matching	matching	matching	matching	MS/MS	matching	matching
HFSVEGQLEFR	WEDHLAVKHFSVEGQL	VEGQLEFRALLFVPRR	K	H	F	F	R	A	0	1	0	0	0	1	2	1	1	0	1	0	0	2	0	1	0	0	0	1	0	11	0	1347.66	Q76LV2;Q76LV1	Q76LV2	329	339	no	no	2	1.8332e-15	124.12	matching	matching	matching	matching	matching	matching	matching	matching
HFWQQDDPQSSWDR	FLTGSQARHFWQQDDP	DPQSSWDRVKDFATVY	R	H	F	D	R	V	0	1	0	3	0	3	0	0	1	0	0	0	0	1	1	2	0	2	0	0	0	14	0	1830.77	P15497;CON__P15497	P15497	20	33	yes	no	2;3	2.1472e-20	147.52	matching	matching	matching	matching	matching	matching	matching	matching
HGFDVALNYK	EKVAWLKKHGFDVALN	FDVALNYKTVKSLEEA	K	H	G	Y	K	T	1	0	1	1	0	0	0	1	1	0	1	1	0	1	0	0	0	0	1	1	0	10	0	1162.58	F1N2W0;Q3SZJ4	F1N2W0	185	194	yes	no	2	0.023758	90.827	matching	matching	matching	matching	matching	matching	matching	matching
HGTDDGVVWMNWQGSWYSMK	AYTWDMAKHGTDDGVV	QGSWYSMKKMSMKIRP	K	H	G	M	K	K	0	0	1	2	0	1	0	3	1	0	0	1	2	0	0	2	1	3	1	2	0	20	0	2383.01	F1MAV0;CON__P02676;P02676	F1MAV0	463	482	yes	no	3	0.00031569	85.937	matching	matching	matching	matching	matching	MS/MS	matching	matching
HHLQDLEQALSTAVFK	ILVPQTVKHHLQDLEQ	ALSTAVFKAVIKKLEM	K	H	H	F	K	A	2	0	0	1	0	2	1	0	2	0	3	1	0	1	0	1	1	0	0	1	0	16	0	1835.95	P50448;CON__P50448;E1BMJ0	P50448	339	354	no	no	3	4.4463e-12	144.88	matching	matching	matching	matching	matching	MS/MS	MS/MS	matching
HIADLAGNAEVILPVPAFNVINGGSHAGNK	EKGVPLYRHIADLAGN	GGSHAGNKLAMQEFMI	R	H	I	N	K	L	5	0	4	1	0	0	1	4	2	3	2	1	0	1	2	1	0	0	0	3	0	30	0	2994.57	Q9XSJ4;F1MB08	Q9XSJ4	133	162	yes	no	3;4	1.1053e-11	77.445	matching	matching	matching	matching	matching	MS/MS	matching	matching
HIDELSLPR	WRNSLQPRHIDELSLP	IDELSLPRFSISSDYQ	R	H	I	P	R	F	0	1	0	1	0	0	1	0	1	1	2	0	0	0	1	1	0	0	0	0	0	9	0	1078.58	A0A0A0MPA0;CON__REFSEQ:XP_001252647	A0A0A0MPA0	303	311	no	no	2	3.4536e-10	138.08	matching	MS/MS	matching	matching	MS/MS	MS/MS	MS/MS	matching
HIPVVTQGSNVQSLTQDDGVAK	NPDGSPARHIPVVTQG	TQDDGVAKLSINTQNK	R	H	I	A	K	L	1	0	1	2	0	3	0	2	1	1	1	1	0	0	1	2	2	0	0	4	0	22	0	2292.17	Q2UVX4;CON__Q2UVX4;G3X7A5	Q2UVX4	385	406	yes	no	2;3	5.5926e-140	172.75	MS/MS	MS/MS	MS/MS	MS/MS	MS/MS	MS/MS	MS/MS	MS/MS
HLDFISLLTYDFHGAWR	YDIAQISRHLDFISLL	YDFHGAWRQTVGHHSP	R	H	L	W	R	Q	1	1	0	2	0	0	0	1	2	1	3	0	0	2	0	1	1	1	1	0	0	17	0	2090.04	G3X7D2;P30922	G3X7D2	205	221	yes	no	3	0.00034763	96.435	matching	matching	matching	matching	matching	matching	matching	matching
HLDSVLQQLQTEVFR	TEMGPCRKHLDSVLQQ	QLQTEVFRGAHTLYVP	K	H	L	F	R	G	0	1	0	1	0	3	1	0	1	0	3	0	0	1	0	1	1	0	0	2	0	15	0	1811.95	Q05718;F1MUK3	Q05718	162	176	yes	no	3	9.3968e-14	142.1	matching	matching	matching	matching	matching	MS/MS	matching	matching
HLEGLSEEAIMELNLPTGIPMVYELDK	NSLRGIVKHLEGLSEE	PMVYELDKNLKPIKPM	K	H	L	D	K	N	1	0	1	1	0	0	5	2	1	2	5	1	2	0	2	1	1	0	1	1	0	27	0	3040.51	Q3SZ62	Q3SZ62	196	222	yes	yes	3	3.3123e-13	100.92	matching	matching	matching	matching	matching	MS/MS	matching	matching
HLGAYELLLK	VYEELLARHLGAYELL	GAYELLLKVRPQQLVK	R	H	L	L	K	V	1	0	0	0	0	0	1	1	1	0	4	1	0	0	0	0	0	0	1	0	0	10	0	1155.67	F1MMD7;Q3T052;CON__Q3T052	F1MMD7	154	163	yes	no	2	2.8211e-06	150.35	matching	MS/MS	matching	MS/MS	matching	MS/MS	matching	matching
HLQMDIHIFEPQGISFLETESTFMTNK	VRPQQLVKHLQMDIHI	ESTFMTNKLAEALTTS	K	H	L	N	K	L	0	0	1	1	0	2	3	1	2	3	2	1	2	3	1	2	3	0	0	0	0	27	0	3192.53	F1MMD7;Q3T052;CON__Q3T052	F1MMD7	172	198	yes	no	3;4	6.8005e-31	124.51	matching	matching	matching	matching	matching	MS/MS	matching	matching
HLSGNVVLQLTLGDR	SKAKDNYRHLSGNVVL	LQLTLGDRVWLESKLD	R	H	L	D	R	V	0	1	1	1	0	1	0	2	1	0	4	0	0	0	0	1	1	0	0	2	0	15	0	1620.89	Q2KIU3;CON__Q2KIU3	Q2KIU3	169	183	yes	no	2	0.03992	57.973	matching	matching	matching	matching	matching	matching	matching	matching
HLVDEPQNLIK	STVFDKLKHLVDEPQN	DEPQNLIKQNCDQFEK	K	H	L	I	K	Q	0	0	1	1	0	1	1	0	1	1	2	1	0	0	1	0	0	0	0	1	0	11	0	1304.71	P02769;CON__P02769	P02769	402	412	yes	no	2;3	0	242.97	MS/MS	MS/MS	MS/MS	MS/MS	MS/MS	MS/MS	MS/MS	MS/MS
HLVETPPLY	DGEPELHRHLVETPPL	LVETPPLY________	R	H	L	L	Y	-	0	0	0	0	0	0	1	0	1	0	2	0	0	0	2	0	1	0	1	1	0	9	0	1067.57	G3MYN2;E1BI67	G3MYN2	195	203	yes	no	2	3.6706e-09	138.83	matching	matching	matching	MS/MS	MS/MS	MS/MS	matching	matching
HNQLPLVIEFTEQTAPK	EKLLDFIKHNQLPLVI	FTEQTAPKIFGGEIKT	K	H	N	P	K	I	1	0	1	0	0	2	2	0	1	1	2	1	0	1	2	0	2	0	0	1	0	17	0	1964.04	A6H7J6;P05307	A6H7J6	233	249	yes	no	3	0.035049	49.265	matching	matching	matching	matching	matching	matching	matching	matching
HPDASVNFSEFSK	CREEHKKKHPDASVNF	VNFSEFSKKCSERWKT	K	H	P	S	K	K	1	0	1	1	0	0	1	0	1	0	0	1	0	2	1	3	0	0	0	1	0	13	0	1463.67	P10103;E1BMK2	P10103	31	43	yes	no	2	0.00069148	121.18	matching	matching	matching	matching	matching	matching	matching	matching
HPDSSVNFAEFSK	CREEHKKKHPDSSVNF	VNFAEFSKKCSERWKT	K	H	P	S	K	K	1	0	1	1	0	0	1	0	1	0	0	1	0	2	1	3	0	0	0	1	0	13	0	1463.67	P40673;F1MF42	P40673	31	43	yes	no	2;3	1.3054e-05	141.73	matching	matching	matching	matching	matching	matching	matching	matching
HPEYAVSVLLR	FLYEYSRRHPEYAVSV	YAVSVLLRLAKEYEAT	R	H	P	L	R	L	1	1	0	0	0	0	1	0	1	0	2	0	0	0	1	1	0	0	1	2	0	11	0	1282.7	P02769;CON__P02769	P02769	361	371	yes	no	2;3	7.0383e-67	172.98	MS/MS	MS/MS	MS/MS	MS/MS	MS/MS	MS/MS	MS/MS	MS/MS
HPHPHLSFMAIPPK	AQPTTMARHPHPHLSF	SFMAIPPKKNQDKTEI	R	H	P	P	K	K	1	0	0	0	0	0	0	0	3	1	1	1	1	1	4	1	0	0	0	0	0	14	0	1607.84	CON__P02668;P02668	CON__P02668	98	111	yes	no	3	0.027111	75.739	MS/MS	matching	matching	matching	matching	matching	matching	matching
HPIKHQGLPQEVLNENLLR	________________	VLNENLLRFFVAPFPE	K	H	P	L	R	F	0	1	2	0	0	2	2	1	2	1	4	1	0	0	2	0	0	0	0	1	0	19	1	2234.23	CON__P02662;P02662	CON__P02662	4	22	yes	no	3	2.2442e-15	128.82	MS/MS	matching	MS/MS	matching	matching	matching	matching	MS/MS
HPSDFGADAQAAMSK	IIHVLHAKHPSDFGAD	DAQAAMSKALELFRND	K	H	P	S	K	A	4	0	0	2	0	1	0	1	1	0	0	1	1	1	1	2	0	0	0	0	0	15	0	1531.67	P02192	P02192	120	134	yes	yes	3	0.022231	67.019	matching	matching	matching	matching	matching	matching	matching	MS/MS
HPYFYAPELLYYANK	YLYEIARRHPYFYAPE	ELLYYANKYNGVFQEC	R	H	P	N	K	Y	2	0	1	0	0	0	1	0	1	0	2	1	0	1	2	0	0	0	4	0	0	15	0	1887.92	P02769;CON__P02769	P02769	169	183	yes	no	2;3	0	247.29	MS/MS	matching	MS/MS	MS/MS	MS/MS	MS/MS	MS/MS	matching
HQATLELTESGVDATAASVVSVAR	DVQVSGIRHQATLELT	ASVVSVARNLLLFEVQ	R	H	Q	A	R	N	5	1	0	1	0	1	2	1	1	0	2	0	0	0	0	3	3	0	0	4	0	24	0	2411.23	P50448;CON__P50448	P50448	411	434	yes	no	3	1.8959e-36	131.56	matching	matching	matching	matching	matching	matching	MS/MS	MS/MS
HQATLELTESGVEATAASVVSVAR	DVQVSGIRHQATLELT	ASVVSVARNLLLFEVQ	R	H	Q	A	R	N	5	1	0	0	0	1	3	1	1	0	2	0	0	0	0	3	3	0	0	4	0	24	0	2425.24	E1BMJ0	E1BMJ0	411	434	yes	yes	3	1.5776e-19	121.65	matching	MS/MS	matching	MS/MS	matching	matching	matching	matching
HQGLPQEVLNENLLR	________________	VLNENLLRFFVAPFPE	K	H	Q	L	R	F	0	1	2	0	0	2	2	1	1	0	4	0	0	0	1	0	0	0	0	1	0	15	0	1758.94	CON__P02662;P02662	CON__P02662	8	22	yes	no	2;3	0	259.96	MS/MS	MS/MS	MS/MS	MS/MS	MS/MS	MS/MS	MS/MS	MS/MS
HQGTITVNEEGTQAAAVTAVGFMPLSTQVR	RIVIDLFKHQGTITVN	MPLSTQVRFSVDRPFL	K	H	Q	V	R	F	4	1	1	0	0	3	2	3	1	1	1	0	1	1	1	1	5	0	0	4	0	30	0	3112.56	CON__ENSEMBL:ENSBTAP00000018574;A6QPP2	CON__ENSEMBL:ENSBTAP00000018574	436	465	yes	no	3	5.761e-19	103.42	matching	matching	matching	matching	matching	MS/MS	matching	matching
HQLYIDETVK	EYSSHLEKHQLYIDET	LYIDETVKNNIPTKLR	K	H	Q	V	K	N	0	0	0	1	0	1	1	0	1	1	1	1	0	0	0	0	1	0	1	1	0	10	0	1244.64	F1MAV0;CON__P02676;P02676	F1MAV0	183	192	yes	no	2;3	2.4137e-16	155.33	matching	MS/MS	matching	matching	MS/MS	MS/MS	matching	MS/MS
HSQAVEELAEQLEQTK	QIQDMRQKHSQAVEEL	AEQLEQTKRVKANLEK	K	H	S	T	K	R	2	0	0	0	0	3	4	0	1	0	2	1	0	0	0	1	1	0	0	1	0	16	0	1838.9	F1MQ37	F1MQ37	1194	1209	yes	yes	3	0.001066	99.238	matching	matching	matching	matching	matching	matching	matching	matching
HSTVFDNLPNPEDR	AGDVAFVKHSTVFDNL	NLPNPEDRKNYELLCG	K	H	S	D	R	K	0	1	2	2	0	0	1	0	1	0	1	0	0	1	2	1	1	0	0	1	0	14	0	1639.76	G3X6N3;CON__Q0IIK2;CON__Q29443;Q29443	G3X6N3	230	243	yes	no	2;3	1.0724e-240	222.55	MS/MS	MS/MS	MS/MS	MS/MS	MS/MS	MS/MS	MS/MS	MS/MS
HSTVFDNLPNPEDRK	AGDVAFVKHSTVFDNL	LPNPEDRKNYELLCGD	K	H	S	R	K	N	0	1	2	2	0	0	1	0	1	0	1	1	0	1	2	1	1	0	0	1	0	15	1	1767.85	G3X6N3;CON__Q0IIK2;CON__Q29443;Q29443	G3X6N3	230	244	yes	no	2;3	3.0684e-248	225.21	matching	matching	matching	matching	matching	matching	MS/MS	matching
HTFSGVASVESSSGEAFHVGK	HRAHYDLRHTFSGVAS	GEAFHVGKTPIVGQPS	R	H	T	G	K	T	2	0	0	0	0	0	2	3	2	0	0	1	0	2	0	5	1	0	0	3	0	21	0	2119	P12763;CON__P12763	P12763	313	333	yes	no	2;3;4	0	247	matching	matching	matching	matching	matching	MS/MS	MS/MS	matching
HTSLQTTSAGSGSFTDVR	RGEWKCERHTSLQTTS	SGSFTDVRTAIYQPQP	R	H	T	V	R	T	1	1	0	1	0	1	0	2	1	0	1	0	0	1	0	4	4	0	0	1	0	18	0	1850.88	B8Y9S9;P07589;G5E5A9;B8Y9T0	B8Y9S9	274	291	yes	no	3	0.00029215	97.352	matching	matching	matching	matching	matching	matching	matching	matching
HVFGESDELIGQK	VLGHSERRHVFGESDE	SDELIGQKVAHALAEG	R	H	V	Q	K	V	0	0	0	1	0	1	2	2	1	1	1	1	0	1	0	1	0	0	0	1	0	13	0	1457.72	Q5E956	Q5E956	101	113	yes	yes	2	1.5865e-12	141.37	matching	matching	matching	matching	matching	matching	matching	matching
HVVPNEVVVQR	GGVASGFKHVVPNEVV	PNEVVVQRLFQVKGRR	K	H	V	Q	R	L	0	1	1	0	0	1	1	0	1	0	0	0	0	0	1	0	0	0	0	5	0	11	0	1274.71	F1N1I6;CON__Q3SX14;Q3SX14;F1MJH1	F1N1I6	177	187	yes	no	2;3	0.0034294	105.4	matching	matching	matching	matching	matching	matching	matching	matching
HYTIAALLSPYSYSTTALVSSPK	TANDSGPRHYTIAALL	TALVSSPKA_______	R	H	Y	P	K	A	3	0	0	0	0	0	0	0	1	1	3	1	0	0	2	5	3	0	3	1	0	23	0	2469.28	O46375	O46375	124	146	yes	yes	3	0.000166	102.15	matching	matching	matching	matching	matching	matching	matching	matching
HYWEVEVGDR	REAFTSGRHYWEVEVG	WEVEVGDRTDWAIGVC	R	H	Y	D	R	T	0	1	0	1	0	0	2	1	1	0	0	0	0	0	0	0	0	1	1	2	0	10	0	1288.58	P18892;F1MZI6;E1BQ22	P18892	358	367	yes	no	2	0.0094962	101.3	matching	matching	matching	matching	matching	matching	MS/MS	matching
HYYIAAEEVIWNYAPSGIDAFTK	DNIHGKIRHYYIAAEE	SGIDAFTKENLRAPGS	R	H	Y	T	K	E	4	0	1	1	0	0	2	1	1	3	0	1	0	1	1	1	1	1	3	1	0	23	0	2657.28	F1N076;CON__ENSEMBL:ENSBTAP00000031900	F1N076	372	394	no	no	3	5.3681e-136	183.22	matching	matching	matching	matching	matching	matching	matching	matching
HYYIGIIETAWNYASDYGEK	TSAWAKDKHYYIGIIE	YASDYGEKKLISVDTE	K	H	Y	E	K	K	2	0	1	1	0	0	2	2	1	3	0	1	0	0	0	1	1	1	4	0	0	20	0	2392.1	F1N076;CON__ENSEMBL:ENSBTAP00000031900	F1N076	23	42	no	no	3	0.00030532	90.872	matching	matching	matching	matching	matching	matching	matching	matching
IAEFTTNLMEEEEK	EKKLLEDRIAEFTTNL	NLMEEEEKSKSLAKLK	R	I	A	E	K	S	1	0	1	0	0	0	5	0	0	1	1	1	1	1	0	0	2	0	0	0	0	14	0	1682.77	F1MQ37	F1MQ37	1001	1014	yes	yes	2	7.4789e-298	222.75	matching	matching	matching	matching	MS/MS	matching	matching	matching
IALGGLLFPASDLR	NNSQLIMRIALGGLLF	LFPASDLRLPLVPALD	R	I	A	L	R	L	2	1	0	1	0	0	0	2	0	1	4	0	0	1	1	1	0	0	0	0	0	14	0	1441.83	CON__Q6T181;A5PKC2	CON__Q6T181	169	182	yes	no	2	0.015229	78.814	matching	matching	matching	matching	matching	matching	matching	matching
IALLEEAR	ELAEYTAKIALLEEAR	IALLEEARRRKENEVE	K	I	A	A	R	R	2	1	0	0	0	0	2	0	0	1	2	0	0	0	0	0	0	0	0	0	0	8	0	913.523	P31976	P31976	428	435	yes	yes	2	0.00070882	112.41	matching	matching	matching	matching	matching	matching	matching	matching
IANDSSINHEYLPILGLAEFR	VVRKVEQRIANDSSIN	ILGLAEFRTCASRLAL	R	I	A	F	R	T	2	1	2	1	0	0	2	1	1	3	3	0	0	1	1	2	0	0	1	0	0	21	0	2371.22	P33097	P33097	61	81	yes	yes	3	0.00052966	78.418	matching	matching	matching	matching	matching	matching	matching	matching
IANQKMEENKK	EYINFLLKIANQKMEE	QKMEENKKRIERFYHC	K	I	A	K	K	R	1	0	2	0	0	1	2	0	0	1	0	3	1	0	0	0	0	0	0	0	0	11	2	1331.69	Q5E9U4	Q5E9U4	173	183	yes	yes	2	0.0082628	71.03	matching	matching	matching	matching	matching	matching	matching	matching
IAQDLEMYGINYFEIK	SAMLEYLKIAQDLEMY	GINYFEIKNKKGTDLW	K	I	A	I	K	N	1	0	1	1	0	1	2	1	0	3	1	1	1	1	0	0	0	0	2	0	0	16	0	1945.95	P31976	P31976	194	209	yes	yes	2	8.9759e-44	172.96	matching	matching	matching	matching	matching	MS/MS	matching	matching
IAQDLEMYGVNYFSIK	DAVLEYLKIAQDLEMY	GVNYFSIKNKKGSELW	K	I	A	I	K	N	1	0	1	1	0	1	1	1	0	2	1	1	1	1	0	1	0	0	2	1	0	16	0	1889.92	Q2HJ49	Q2HJ49	194	209	yes	yes	2	3.3882e-72	169.06	matching	matching	matching	matching	matching	MS/MS	matching	matching
IAQLEEELEEEQGNTELVNDR	EKRRLEARIAQLEEEL	NTELVNDRLKKANLQI	R	I	A	D	R	L	1	1	2	1	0	2	7	1	0	1	3	0	0	0	0	0	1	0	0	1	0	21	0	2457.15	F1MQ37	F1MQ37	1731	1751	yes	yes	2	4.7225e-167	175.02	matching	matching	matching	matching	matching	matching	matching	matching
IAQWQNLEVENGLQQLTFPLSSEPFQGSYK	VEDPKGNRIAQWQNLE	EPFQGSYKVVVQKGSG	R	I	A	Y	K	V	1	0	2	0	0	5	3	2	0	1	4	1	0	2	2	3	1	1	1	1	0	30	0	3450.71	Q7SIH1;CON__ENSEMBL:ENSBTAP00000024146	Q7SIH1	175	204	yes	no	3	0.0045756	40.044	matching	matching	matching	matching	matching	matching	matching	matching
IAWESPQGQVSR	DVDVDSIKIAWESPQG	SPQGQVSRYRVTYSSP	K	I	A	S	R	Y	1	1	0	0	0	2	1	1	0	1	0	0	0	0	1	2	0	1	0	1	0	12	0	1356.68	B8Y9S9;P07589;G5E5A9	B8Y9S9	1651	1662	yes	no	2	0.0074654	95.183	matching	matching	matching	matching	matching	MS/MS	matching	matching
ICNQKTTQSIRIQPNDISFLSQWQIPEVIPK	LTKLEGSKICNQKTTQ	QIPEVIPKIDTENCSL	K	I	C	P	K	I	0	1	2	1	1	5	1	0	0	6	1	2	0	1	3	3	2	1	0	1	0	31	2	3680.93	G3N0K5	G3N0K5	354	384	yes	yes	4	0.0046635	50.029	matching	matching	matching	matching	matching	matching	matching	matching
IDALNENK	TKIPAVFKIDALNENK	IDALNENKVLVLDTDY	K	I	D	N	K	V	1	0	2	1	0	0	1	0	0	1	1	1	0	0	0	0	0	0	0	0	0	8	0	915.466	CON__P02754;P02754;G5E5H7	CON__P02754	84	91	yes	no	2	1.5121e-14	152.11	MS/MS	MS/MS	MS/MS	MS/MS	matching	MS/MS	MS/MS	MS/MS
IDALNENKVLVLDTDYK	TKIPAVFKIDALNENK	LVLDTDYKKYLLFCME	K	I	D	Y	K	K	1	0	2	3	0	0	1	0	0	1	3	2	0	0	0	0	1	0	1	2	0	17	1	1962.03	CON__P02754;P02754;G5E5H7	CON__P02754	84	100	yes	no	2;3	0	236.27	MS/MS	MS/MS	MS/MS	matching	matching	matching	MS/MS	MS/MS
IDALNENKVLVLDTDYKK	TKIPAVFKIDALNENK	VLDTDYKKYLLFCMEN	K	I	D	K	K	Y	1	0	2	3	0	0	1	0	0	1	3	3	0	0	0	0	1	0	1	2	0	18	2	2090.13	CON__P02754;P02754;G5E5H7	CON__P02754	84	101	yes	no	2;3;4	0	248.01	MS/MS	MS/MS	MS/MS	MS/MS	MS/MS	matching	MS/MS	MS/MS
IDAQSNSVDLLFFTDESGDSR	CGKQRPERIDAQSNSV	TDESGDSRGWKLYYTS	R	I	D	S	R	G	1	1	1	4	0	1	1	1	0	1	2	0	0	2	0	4	1	0	0	1	0	21	0	2315.06	A5D9E9;Q3SYT3	A5D9E9	276	296	yes	no	2	0.029046	55.128	matching	matching	matching	matching	matching	matching	matching	matching
IDEPLEGSEDR	HESGASIKIDEPLEGS	PLEGSEDRIITITGTQ	K	I	D	D	R	I	0	1	0	2	0	0	3	1	0	1	1	0	0	0	1	1	0	0	0	0	0	11	0	1258.57	Q3T0D0	Q3T0D0	423	433	yes	yes	2	0.020016	83.226	matching	matching	matching	matching	matching	matching	matching	matching
IDFYFDENPYFENK	EDIKSGYRIDFYFDEN	ENPYFENKILSKEFHL	R	I	D	N	K	I	0	0	2	2	0	0	2	0	0	1	0	1	0	3	1	0	0	0	2	0	0	14	0	1839.8	F1MCF1;G3X6T8	F1MCF1	101	114	yes	no	2	1.8062e-12	138.28	matching	matching	matching	matching	matching	matching	matching	matching
IDSLMENDREQSHVMDVMEDSFTR	YFWINGDRIDSLMEND	VMEDSFTRASSIMDEL	R	I	D	T	R	A	0	2	1	4	0	1	3	0	1	1	1	0	3	1	0	3	1	0	0	2	0	24	1	2883.25	P17697;CON__P17697	P17697	153	176	yes	no	3;4	5.568e-05	74.742	matching	MS/MS	matching	matching	matching	MS/MS	MS/MS	MS/MS
IDTIEIITDR	DYFEEYGKIDTIEIIT	TIEIITDRQSGKKRGF	K	I	D	D	R	Q	0	1	0	2	0	0	1	0	0	4	0	0	0	0	0	0	2	0	0	0	0	10	0	1187.64	Q2HJ60	Q2HJ60	126	135	yes	yes	2	1.8104e-57	187.42	matching	matching	matching	matching	matching	matching	matching	matching
IEDGNDFGVAIQEK	WIQHLIPKIEDGNDFG	FGVAIQEKVLERVNAV	K	I	E	E	K	V	1	0	1	2	0	1	2	2	0	2	0	1	0	1	0	0	0	0	0	1	0	14	0	1533.73	Q5E9G3;F1MU19	Q5E9G3	132	145	yes	no	2	3.2851e-50	162.64	matching	matching	matching	matching	matching	matching	matching	matching
IEDGNNFGVAVQEK	WLQLQIPRIEDGNNFG	FGVAVQEKVFELMTAL	R	I	E	E	K	V	1	0	2	1	0	1	2	2	0	1	0	1	0	1	0	0	0	0	0	2	0	14	0	1518.73	Q4U5R3;Q2KJE7	Q4U5R3	142	155	yes	no	2	8.9948e-07	153.79	matching	matching	matching	matching	matching	matching	matching	matching
IEDLSQQAQLAAAEK	YIVFGEAKIEDLSQQA	AQLAAAEKFKVQGEAV	K	I	E	E	K	F	4	0	0	1	0	3	2	0	0	1	2	1	0	0	0	1	0	0	0	0	0	15	0	1613.83	Q5E9A1	Q5E9A1	128	142	yes	yes	2	0.00046684	102.08	matching	matching	matching	matching	matching	matching	matching	matching
IEDSFSVK	VVHMPRFRIEDSFSVK	IEDSFSVKEQLQDMGL	R	I	E	V	K	E	0	0	0	1	0	0	1	0	0	1	0	1	0	1	0	2	0	0	0	1	0	8	0	923.46	P41361;F1MSZ6;CON__P41361	P41361	358	365	yes	no	2	0.017234	93.143	matching	matching	matching	matching	matching	MS/MS	matching	matching
IEELFK	VKNKTQGKIEELFKYL	GKIEELFKYLSPRTEL	K	I	E	F	K	Y	0	0	0	0	0	0	2	0	0	1	1	1	0	1	0	0	0	0	0	0	0	6	0	777.427	Q3ZEJ6;CON__A2I7N0;A2I7N0;Q9TTE1;CON__Q9TTE1;A2I7M9;G8JKW7	Q9TTE1	186	191	no	no	1	7.9431e-06	114.67	matching	matching	matching	matching	matching	matching	matching	matching
IEENVEELR	YADQLQTKIEENVEEL	EENVEELRRSLAPYAQ	K	I	E	L	R	R	0	1	1	0	0	0	4	0	0	1	1	0	0	0	0	0	0	0	0	1	0	9	0	1129.56	Q32PJ2;F1N3Q7;CON__Q32PJ2	Q32PJ2	212	220	yes	no	2	4.4923e-13	147.75	matching	matching	MS/MS	matching	MS/MS	matching	matching	matching
IEENVEELRR	YADQLQTKIEENVEEL	ENVEELRRSLAPYAQD	K	I	E	R	R	S	0	2	1	0	0	0	4	0	0	1	1	0	0	0	0	0	0	0	0	1	0	10	1	1285.66	Q32PJ2;F1N3Q7;CON__Q32PJ2	Q32PJ2	212	221	yes	no	2;3	0.00085939	121.6	matching	matching	matching	matching	matching	matching	MS/MS	matching
IEGLTDEFEELEFLSTINVGLTSVANLPK	NCRSNEGKIEGLTDEF	TSVANLPKLNKLKKLE	K	I	E	P	K	L	1	0	2	1	0	0	5	2	0	2	5	1	0	2	1	2	3	0	0	2	0	29	0	3177.63	P51122	P51122	34	62	yes	yes	3	1.2329e-10	85.798	matching	matching	matching	matching	matching	matching	matching	matching
IEGSDKVPVDPATYGQFYGGDSYIILYNYR	RGQKQIWRIEGSDKVP	YIILYNYRHGGRQGQI	R	I	E	Y	R	H	1	1	1	3	0	1	1	4	0	3	1	1	0	1	2	2	1	0	5	2	0	30	1	3399.63	F1N1I6;CON__Q3SX14;Q3SX14;F1MJH1	F1N1I6	451	480	yes	no	3	3.7582e-15	88.186	matching	matching	matching	MS/MS	matching	MS/MS	matching	matching
IEGYEDQVLITEHGDLGNSR	MDQFTPVKIEGYEDQV	HGDLGNSRFLDPRNKI	K	I	E	S	R	F	0	1	1	2	0	1	3	3	1	2	2	0	0	0	0	1	1	0	1	1	0	20	0	2244.07	A4FUA8	A4FUA8	67	86	yes	yes	3	3.3729e-10	124.84	matching	matching	matching	matching	matching	matching	matching	matching
IEHLWPQGPSTVDAAFLWDK	RDGWHSWRIEHLWPQG	DAAFLWDKKLYLIQGT	R	I	E	D	K	K	2	0	0	2	0	1	1	1	1	1	2	1	0	1	2	1	1	2	0	1	0	20	0	2309.15	Q3SZV7	Q3SZV7	290	309	yes	yes	2;3	6.2279e-46	153.36	matching	matching	matching	matching	matching	MS/MS	matching	matching
IEHLWPQGPSTVDAAFLWDKK	RDGWHSWRIEHLWPQG	AAFLWDKKLYLIQGTQ	R	I	E	K	K	L	2	0	0	2	0	1	1	1	1	1	2	2	0	1	2	1	1	2	0	1	0	21	1	2437.24	Q3SZV7	Q3SZV7	290	310	yes	yes	4	0.0096292	52.814	matching	matching	matching	matching	matching	MS/MS	matching	matching
IEHSFEVDEYVLPK	LLKEPGKRIEHSFEVD	VDEYVLPKFEVQVKMP	R	I	E	P	K	F	0	0	0	1	0	0	3	0	1	1	1	1	0	1	1	1	0	0	1	2	0	14	0	1703.84	F1MI18;F1MJK3	F1MI18	209	222	no	no	3	7.6439e-05	134.56	matching	matching	matching	matching	matching	matching	matching	matching
IEIESFYEGEDFSETLTR	LSSQHQARIEIESFYE	DFSETLTRAKFEELNM	R	I	E	T	R	A	0	1	0	1	0	0	5	1	0	2	1	0	0	2	0	2	2	0	1	0	0	18	0	2163.98	Q0VCX2	Q0VCX2	308	325	yes	yes	2	3.7725e-06	124.45	matching	matching	matching	matching	matching	MS/MS	matching	matching
IEISELNR	GDSVRNSKIEISELNR	IEISELNRVIQRLRSE	K	I	E	N	R	V	0	1	1	0	0	0	2	0	0	2	1	0	0	0	0	1	0	0	0	0	0	8	0	972.524	CON__P04264;CON__P35908	CON__P04264	396	403	no	no	2	0.00127	107.69	matching	matching	matching	matching	matching	matching	MS/MS	matching
IEKFQSEEQQQTEDELQDK	SITRINKKIEKFQSEE	TEDELQDKIHPFAQTQ	K	I	E	D	K	I	0	0	0	2	0	5	5	0	0	1	1	2	0	1	0	1	1	0	0	0	0	19	1	2351.08	CON__P02666;P02666	CON__P02666	30	48	yes	no	2;3	1.3804e-133	198.35	matching	MS/MS	matching	matching	matching	matching	matching	MS/MS
IELQNQEMR	TLTEANEKIELQNQEM	ELQNQEMRKNLEESVQ	K	I	E	M	R	K	0	1	1	0	0	2	2	0	0	1	1	0	1	0	0	0	0	0	0	0	0	9	0	1159.57	G5E6L5;G3MYU4;E1BJ15	G5E6L5	225	233	yes	no	2	0.0071837	83.998	matching	matching	matching	matching	matching	matching	matching	matching
IENGFLSESTFTYPLNK	TCSKSNIRIENGFLSE	TFTYPLNKQTEYKCKP	R	I	E	N	K	Q	0	0	2	0	0	0	2	1	0	1	2	1	0	2	1	2	2	0	1	0	0	17	0	1958.96	Q28085;CON__Q28085;F1MC45	Q28085	453	469	yes	no	2	9.0097e-159	205.12	matching	MS/MS	MS/MS	MS/MS	MS/MS	MS/MS	matching	matching
IENGYVEYLVR	DSCPEPPKIENGYVEY	GYVEYLVRYQCKPYYT	K	I	E	V	R	Y	0	1	1	0	0	0	2	1	0	1	1	0	0	0	0	0	0	0	2	2	0	11	0	1353.69	Q2TBU0;G3X6K8	Q2TBU0	93	103	yes	no	2	8.2687e-171	202.65	matching	MS/MS	matching	matching	MS/MS	MS/MS	matching	matching
IEPELDGSSPVTSHDSSTNGLINFIK	LGKQLAKKIEPELDGS	NGLINFIKQEREARS_	K	I	E	I	K	Q	0	0	2	2	0	0	2	2	1	3	2	1	0	1	2	5	2	0	0	1	0	26	0	2756.35	Q3ZBD7;CON__Q3ZBD7	Q3ZBD7	525	550	no	no	3	1.0346e-05	67.56	matching	matching	matching	matching	matching	MS/MS	matching	matching
IEQFVYSSPHDNK	FRVHQFEKIEQFVYSS	YSSPHDNKSWEMFEEM	K	I	E	N	K	S	0	0	1	1	0	1	1	0	1	1	0	1	0	1	1	2	0	0	1	1	0	13	0	1562.74	Q9GMB8	Q9GMB8	324	336	yes	yes	2	0.027	85.909	matching	matching	matching	matching	matching	matching	matching	matching
IEQQLTLEK	DEATGLKKIEQQLTLE	EQQLTLEKLREWTRPE	K	I	E	E	K	L	0	0	0	0	0	2	2	0	0	1	2	1	0	0	0	0	1	0	0	0	0	9	0	1100.61	Q1JPB0	Q1JPB0	245	253	yes	yes	2	2.0714e-43	161.51	matching	matching	matching	matching	MS/MS	MS/MS	matching	matching
IEWLESHQDADIEDFK	MEKAVEEKIEWLESHQ	DADIEDFKAKKKELEE	K	I	E	F	K	A	1	0	0	3	0	1	3	0	1	2	1	1	0	1	0	1	0	1	0	0	0	16	0	1973.9	Q0VCX2;F1N614	Q0VCX2	603	618	yes	no	2;3	0.0023054	83.856	matching	matching	matching	matching	matching	MS/MS	matching	matching
IFANADLSGITGTADLVVSQVVHGAALDVDEEGTEGAAATGISMER	LSQLGIRKIFANADLS	ATGISMERTILRIIVR	K	I	F	E	R	T	8	1	1	4	0	1	4	6	1	3	3	0	1	1	0	3	4	0	0	5	0	46	0	4557.22	Q9TTE1;CON__Q9TTE1	Q9TTE1	329	374	yes	no	3;4;5	1.3672e-18	49.022	matching	matching	matching	matching	matching	MS/MS	matching	matching
IFGEDDNYSDVVDAAPPTRPGAGAGSVLPLFPGK	EDYLDLEKIFGEDDNY	VLPLFPGKSRVQRLNL	K	I	F	G	K	S	4	1	1	4	0	0	1	5	0	1	2	1	0	2	5	2	1	0	1	3	0	34	1	3428.69	CON__ENSEMBL:ENSBTAP00000018574;A6QPP2	CON__ENSEMBL:ENSBTAP00000018574	84	117	yes	no	3	1.39e-30	89.186	matching	matching	matching	matching	matching	matching	matching	matching
IFGMEPKCRILSQETSTVK	SERPKEIKIFGMEPKC	SQETSTVKKPHKISSN	K	I	F	V	K	K	0	1	0	0	1	1	2	1	0	2	1	2	1	1	1	2	2	0	0	1	0	19	2	2223.14	F6PSE2	F6PSE2	386	404	yes	yes	2	0.0038544	110.34	matching	matching	matching	matching	matching	matching	matching	matching
IFIGNVNNSGLK	VAGRSGDKIFIGNVNN	NVNNSGLKINLFDTPL	K	I	F	L	K	I	0	0	3	0	0	0	0	2	0	2	1	1	0	1	0	1	0	0	0	1	0	12	0	1274.7	Q95114;F1MXX6	Q95114	221	232	yes	no	2	1.0757e-45	168.98	matching	MS/MS	MS/MS	matching	MS/MS	matching	matching	MS/MS
IFPEVMHPLVPIDNHIPEK	LDDSEDIRIFPEVMHP	IDNHIPEKTGSGVPTE	R	I	F	E	K	T	0	0	1	1	0	0	2	0	2	3	1	1	1	1	4	0	0	0	0	2	0	19	0	2224.17	E1BKS1;G3MYP1	E1BKS1	77	95	yes	no	3	0.0010906	81.594	matching	matching	matching	matching	matching	MS/MS	matching	matching
IFQDLDADKDGAVSFEEFVVLVSR	KDQPTIDKIFQDLDAD	EFVVLVSRVLKTAHID	K	I	F	S	R	V	2	1	0	4	0	1	2	1	0	1	2	1	0	3	0	2	0	0	0	4	0	24	1	2698.35	P79105;G3N2H5	P79105	57	80	yes	no	2;3;4	6.5304e-265	168.46	matching	matching	matching	matching	MS/MS	MS/MS	matching	matching
IFSYDPENPPGSEVLQIQNILAEEPK	GCHPNGMKIFSYDPEN	NILAEEPKVTVVYAED	K	I	F	P	K	V	1	0	2	1	0	2	4	1	0	3	2	1	0	1	4	2	0	0	1	1	0	26	0	2926.46	Q2KIW1	Q2KIW1	291	316	yes	yes	3	2.086e-26	108.79	matching	matching	matching	matching	MS/MS	MS/MS	matching	matching
IFTDADLSGITGTADLVVSQVVHGAALDVDEEGTEGAAATGIGIER	LSQMGIKKIFTDADLS	ATGIGIERTFLRIIVR	K	I	F	E	R	T	7	1	0	5	0	1	4	7	1	4	3	0	0	1	0	2	5	0	0	5	0	46	0	4540.25	Q3ZEJ6;CON__A2I7N0;A2I7N0	Q3ZEJ6	329	374	no	no	3;4;5	0.0022229	24.548	matching	MS/MS	matching	matching	matching	MS/MS	matching	MS/MS
IFTDADLSGITGTADLVVSQVVHGTALDVDEEGTEGAAATGIGIEK	LSQMGIKKIFTDADLS	ATGIGIEKLSFQKTTV	K	I	F	E	K	L	6	0	0	5	0	1	4	7	1	4	3	1	0	1	0	2	6	0	0	5	0	46	0	4542.25	G8JKW7	G8JKW7	329	374	yes	yes	3;5	8.6552e-15	47.337	matching	MS/MS	MS/MS	MS/MS	matching	MS/MS	MS/MS	matching
IFTSDADFSGITDDHK	LSQLGIKKIFTSDADF	SGITDDHKLAVSHVIH	K	I	F	H	K	L	1	0	0	4	0	0	0	1	1	2	0	1	0	2	0	2	2	0	0	0	0	16	0	1767.8	A0A0A0MP92	A0A0A0MP92	332	347	yes	yes	2;3	0	249.82	matching	matching	matching	matching	matching	matching	matching	matching
IFTSDADFSGITNDHK	LSQLGIKKIFTSDADF	SGITNDHKLAVSQVIH	K	I	F	H	K	L	1	0	1	3	0	0	0	1	1	2	0	1	0	2	0	2	2	0	0	0	0	16	0	1766.81	A0A0A0MPA0;CON__REFSEQ:XP_001252647	A0A0A0MPA0	332	347	no	no	2;3	0	319.82	MS/MS	MS/MS	matching	MS/MS	MS/MS	matching	MS/MS	matching
IFVGGLSPDTPEEK	KTKEPVKKIFVGGLSP	SPDTPEEKIREYFGGF	K	I	F	E	K	I	0	0	0	1	0	0	2	2	0	1	1	1	0	1	2	1	1	0	0	1	0	14	0	1487.75	A5D9H5;A6H6Y0	A5D9H5	184	197	yes	no	2	0.00010018	98.592	matching	matching	matching	matching	matching	matching	matching	matching
IFVQGIIWDINSFDQWGVELGK	LIAMYEHKIFVQGIIW	QWGVELGKQLAKKIEP	K	I	F	G	K	Q	0	0	1	2	0	2	1	3	0	4	1	1	0	2	0	1	0	2	0	2	0	22	0	2563.31	Q3ZBD7;CON__Q3ZBD7	Q3ZBD7	498	519	no	no	3	0.00036134	68.625	matching	matching	matching	matching	matching	matching	matching	matching
IFYNQQNHYDGTTGK	NVPIRFTKIFYNQQNH	HYDGTTGKFLCNIPGL	K	I	F	G	K	F	0	0	2	1	0	2	0	2	1	1	0	1	0	1	0	0	2	0	2	0	0	15	0	1784.81	Q3Y5Z3;CON__Q3Y5Z3	Q3Y5Z3	130	144	yes	no	2	0	269.87	matching	matching	matching	matching	matching	matching	matching	matching
IGAEVYHNLK	ENFREAMRIGAEVYHN	AEVYHNLKNVIKEKYG	R	I	G	L	K	N	1	0	1	0	0	0	1	1	1	1	1	1	0	0	0	0	0	0	1	1	0	10	0	1142.61	Q9XSJ4;F1MB08	Q9XSJ4	184	193	yes	no	2	1.6962e-103	182.16	matching	matching	matching	matching	MS/MS	matching	matching	matching
IGEHTPSSLAIMENANVLAR	AKWRCVLKIGEHTPSS	ENANVLARYASICQQN	K	I	G	A	R	Y	3	1	2	0	0	0	2	1	1	2	2	0	1	0	1	2	1	0	0	1	0	20	0	2122.08	A6QLL8	A6QLL8	154	173	yes	yes	2;3	5.9927e-106	175.7	matching	matching	matching	matching	MS/MS	matching	matching	matching
IGFPWSEIR	KDDKLTPKIGFPWSEI	GFPWSEIRNISFNDKK	K	I	G	I	R	N	0	1	0	0	0	0	1	1	0	2	0	0	0	1	1	1	0	1	0	0	0	9	0	1103.58	Q2HJ49;P31976;Q32LP2;F1MJJ8	P31976	238	246	no	no	2	2.4469e-08	143.03	matching	matching	matching	matching	matching	matching	matching	matching
IGGIGTVPVGR	LPLQDVYKIGGIGTVP	IGTVPVGRVETGVLKP	K	I	G	G	R	V	0	1	0	0	0	0	0	4	0	2	0	0	0	0	1	0	1	0	0	2	0	11	0	1024.6	E1BED8;P68103;E1B9F6;E1BPF4;E1B7J1;Q32PH8;G3N2F0	E1BED8	237	247	yes	no	2	0.001115	121.36	matching	matching	matching	matching	MS/MS	MS/MS	matching	matching
IGLFADIELSR	GLLWQVIKIGLFADIE	FADIELSRNEALAALL	K	I	G	S	R	N	1	1	0	1	0	0	1	1	0	2	2	0	0	1	0	1	0	0	0	0	0	11	0	1232.68	F1MYX5;A7E3Q8;F1MSB7	F1MYX5	234	244	no	no	2	2.2738e-05	136.5	matching	matching	matching	matching	MS/MS	MS/MS	matching	matching
IGLHEVEVK	PYVIVPLKIGLHEVEV	GLHEVEVKAAVYNHFI	K	I	G	V	K	A	0	0	0	0	0	0	2	1	1	1	1	1	0	0	0	0	0	0	0	2	0	9	0	1022.58	Q2UVX4;CON__Q2UVX4;G3X7A5	Q2UVX4	904	912	yes	no	2	3.4536e-10	148.69	matching	MS/MS	matching	matching	matching	MS/MS	matching	matching
IHELYLPK	RNSLQPRRIHELYLPK	IHELYLPKFSIKSNYE	R	I	H	P	K	F	0	0	0	0	0	0	1	0	1	1	2	1	0	0	1	0	0	0	1	0	0	8	0	1011.58	Q3ZEJ6;CON__A2I7N0;A2I7N0;Q9TTE1;CON__Q9TTE1;A2I7M9;G8JKW7	Q9TTE1	301	308	no	no	2	1.1126e-08	131.03	matching	MS/MS	MS/MS	MS/MS	matching	MS/MS	matching	matching
IHGFDLAAINLQR	KLFQPTHKIHGFDLAA	LAAINLQRCRDHGMPG	K	I	H	Q	R	C	2	1	1	1	0	1	0	1	1	2	2	0	0	1	0	0	0	0	0	0	0	13	0	1466.8	P80025;G3MXZ0	P80025	545	557	yes	no	2;3	2.7811e-62	175.49	MS/MS	matching	MS/MS	MS/MS	MS/MS	MS/MS	MS/MS	MS/MS
IIALDGDTK	KLGHASNRIIALDGDT	IALDGDTKNSTFSELF	R	I	I	T	K	N	1	0	0	2	0	0	0	1	0	2	1	1	0	0	0	0	1	0	0	0	0	9	0	944.518	A7E3W4;A7Z014;Q6B855	A7E3W4	308	316	yes	no	2	0.041504	71.614	matching	matching	matching	matching	matching	matching	matching	matching
IIEETLALK	ILLEVNNRIIEETLAL	IEETLALKFENAAAGN	R	I	I	L	K	F	1	0	0	0	0	0	2	0	0	2	2	1	0	0	0	0	1	0	0	0	0	9	0	1028.61	Q3MHR7	Q3MHR7	10	18	yes	yes	2	0.0011664	117.53	matching	matching	matching	matching	matching	MS/MS	matching	matching
IIEHAENEYQTAISENYQTMSDTTFK	QTAKEFIKIIEHAENE	TMSDTTFKALRRQLPV	K	I	I	F	K	A	2	0	2	1	0	2	4	0	1	3	0	1	1	1	0	2	4	0	2	0	0	26	0	3062.38	A4FUA8	A4FUA8	231	256	yes	yes	3	4.0243e-07	116.38	matching	matching	matching	matching	matching	matching	matching	matching
IIEPQGLR	KHLEVDVRIIEPQGLR	IIEPQGLRSLHVLDTF	R	I	I	L	R	S	0	1	0	0	0	1	1	1	0	2	1	0	0	0	1	0	0	0	0	0	0	8	0	924.539	F1MNW4;CON__Q9TRI1	F1MNW4	215	222	yes	no	2	0.0013579	106.04	matching	MS/MS	matching	MS/MS	matching	matching	matching	matching
IINEPTAAAIAYGLDK	IAGLNVLRIINEPTAA	AIAYGLDKKVGAERNV	R	I	I	D	K	K	4	0	1	1	0	0	1	1	0	3	1	1	0	0	1	0	1	0	1	0	0	16	0	1658.89	P19120;P34933;Q0VCX2	P19120	172	187	no	no	2	0	222.96	matching	matching	matching	matching	matching	MS/MS	matching	matching
IINEPTAAAIAYGLDR	IAGLNVLRIINEPTAA	AIAYGLDRTGKGERNV	R	I	I	D	R	T	4	1	1	1	0	0	1	1	0	3	1	0	0	0	1	0	1	0	1	0	0	16	0	1686.89	Q27975;Q27965	Q27975	172	187	no	no	2	0.057944	65.265	matching	matching	matching	matching	matching	matching	matching	matching
IIPENPYILTTPGFLSDIQVIIQAR	VLPNFEVKIIPENPYI	IQVIIQARYIYGKPVQ	K	I	I	A	R	Y	1	1	1	1	0	2	1	1	0	6	2	0	0	1	3	1	2	0	1	1	0	25	0	2810.56	E1BH06;CON__P01030;CON__ENSEMBL:ENSBTAP00000007350;F1MVK1	CON__ENSEMBL:ENSBTAP00000007350	245	269	no	no	3	5.9506e-12	99.078	matching	matching	matching	MS/MS	matching	MS/MS	matching	matching
IIPSAEDPSQDIVER	KCARITSRIIPSAEDP	PSQDIVERNVRIIVPL	R	I	I	E	R	N	1	1	0	2	0	1	2	0	0	3	0	0	0	0	2	2	0	0	0	1	0	15	0	1667.84	Q3SYR8	Q3SYR8	44	58	yes	yes	2	2.2526e-16	149.22	MS/MS	MS/MS	MS/MS	MS/MS	matching	matching	MS/MS	MS/MS
IIQQWPHYR	SPGDELYKIIQQWPHY	IQQWPHYRRV______	K	I	I	Y	R	R	0	1	0	0	0	2	0	0	1	2	0	0	0	0	1	0	0	1	1	0	0	9	0	1239.65	Q8SPP7	Q8SPP7	180	188	yes	yes	2;3	0.0034813	109.11	matching	matching	matching	matching	matching	matching	matching	matching
IITHPNFNGNTLDNDIMLIK	EQFINAAKIITHPNFN	DNDIMLIKLSSPATLN	K	I	I	I	K	L	0	0	4	2	0	0	0	1	1	4	2	1	1	1	1	0	2	0	0	0	0	20	0	2282.17	CON__P00761	CON__P00761	78	97	yes	yes	2;3	1.8068e-124	172.55	MS/MS	MS/MS	MS/MS	MS/MS	MS/MS	MS/MS	MS/MS	MS/MS
IITITGTQDQIQNAQYLLQNSVK	PLEGSEDRIITITGTQ	YLLQNSVKQYADVEGF	R	I	I	V	K	Q	1	0	2	1	0	5	0	1	0	4	2	1	0	0	0	1	3	0	1	1	0	23	0	2588.38	Q3T0D0	Q3T0D0	434	456	yes	yes	3	6.537e-20	138.77	matching	matching	matching	matching	matching	MS/MS	matching	matching
IIVPLNSR	DIVERNVRIIVPLNSR	IIVPLNSRENISDPTS	R	I	I	S	R	E	0	1	1	0	0	0	0	0	0	2	1	0	0	0	1	1	0	0	0	1	0	8	0	910.56	Q3SYR8	Q3SYR8	62	69	yes	yes	2	0.019912	79.469	matching	MS/MS	matching	matching	matching	matching	matching	matching
IIYLNQLLQEDSFNVTDLNSLR	LYRFLPQKIIYLNQLL	VTDLNSLRAPLDIPIP	K	I	I	L	R	A	0	1	3	2	0	2	1	0	0	2	5	0	0	1	0	2	1	0	1	1	0	22	0	2607.35	Q5E9G3;F1MU19	Q5E9G3	40	61	yes	no	3	7.5493e-25	135.43	matching	matching	matching	matching	matching	matching	matching	matching
IKGEHPGLSIGDVAK	FCSEYRPKIKGEHPGL	LSIGDVAKKLGEMWNN	K	I	K	A	K	K	1	0	0	1	0	0	1	3	1	2	1	2	0	0	1	1	0	0	0	1	0	15	1	1519.84	P10103;E1BMK2	P10103	113	127	yes	no	3	0.0029277	92.265	matching	matching	matching	matching	matching	matching	matching	matching
ILAQSNNQQLR	REAAERLRILAQSNNQ	QSNNQQLRDLGILSVQ	R	I	L	L	R	D	1	1	2	0	0	3	0	0	0	1	2	0	0	0	0	1	0	0	0	0	0	11	0	1283.69	E1BND5	E1BND5	113	123	yes	yes	2	0.053527	55.314	matching	matching	matching	matching	matching	matching	matching	matching
ILATPPEEDAPSVDITNIR	GQIQSKKKILATPPEE	SVDITNIRMPTPPNYK	K	I	L	I	R	M	2	1	1	2	0	0	2	0	0	3	1	0	0	0	3	1	2	0	0	1	0	19	0	2050.06	A7E3W4;A7Z014;Q6B855	A7E3W4	257	275	yes	no	2	3.6821e-06	118.48	matching	matching	matching	matching	matching	matching	matching	matching
ILDDLSPHDQFDLISFSSEATTWK	QTREALIKILDDLSPH	SSEATTWKPLLVPAST	K	I	L	W	K	P	1	0	0	4	0	1	1	0	1	2	3	1	0	2	1	4	2	1	0	0	0	24	0	2764.32	F1MMD7;Q3T052;CON__Q3T052	F1MMD7	301	324	yes	no	3	5.6426e-16	115.36	matching	matching	matching	matching	matching	MS/MS	matching	matching
ILDDLSPHDQFDLISFSSEATTWKPLLVPASTENVNEAK	QTREALIKILDDLSPH	TENVNEAKSYATGIQA	K	I	L	A	K	S	3	0	2	4	0	1	3	0	1	2	5	2	0	2	3	5	3	1	0	2	0	39	1	4327.15	F1MMD7;Q3T052;CON__Q3T052	F1MMD7	301	339	yes	no	3;4	1.3086e-10	60.279	matching	matching	matching	matching	matching	MS/MS	matching	matching
ILEIPYK	SLEDVQAKILEIPYKG	KILEIPYKGEELSMMV	K	I	L	Y	K	G	0	0	0	0	0	0	1	0	0	2	1	1	0	0	1	0	0	0	1	0	0	7	0	874.516	E1B8B5;F1MMS7;A6QPZ4;G3X894;G5E537	A6QPZ4	179	185	no	no	2	5.2261e-06	107.32	matching	matching	matching	matching	MS/MS	matching	matching	matching
ILEIPYKGEELSMLVLLPNEVDGLQELEDQLTAEK	SLEDVQAKILEIPYKG	EDQLTAEKLIAWTSPQ	K	I	L	E	K	L	1	0	1	2	0	2	7	2	0	2	8	2	1	0	2	1	1	0	1	2	0	35	1	3968.06	G5E537	G5E537	86	120	yes	yes	3;4	2.725e-10	65.06	matching	matching	matching	matching	matching	matching	matching	matching
ILEIPYKGEELSMMVLLPNEVDGLQELEDQLTAEK	SLEDVQAKILEIPYKG	EDQLTAEKLIAWTSPQ	K	I	L	E	K	L	1	0	1	2	0	2	7	2	0	2	7	2	2	0	2	1	1	0	1	2	0	35	1	3986.02	A6QPZ4	A6QPZ4	179	213	yes	yes	3;4	1.8498e-09	64.885	matching	matching	matching	matching	matching	MS/MS	matching	matching
ILELQMQSIMEKK	KPEEYAHKILELQMQS	MQSIMEKKMKTKRSIA	K	I	L	K	K	M	0	0	0	0	0	2	2	0	0	2	2	2	2	0	0	1	0	0	0	0	0	13	1	1589.85	E1BJZ0	E1BJZ0	868	880	yes	yes	2	0.022029	61.235	matching	matching	matching	matching	matching	matching	matching	matching
ILLAELEQLK	RFLEQQNKILLAELEQ	LAELEQLKGQGKSRLG	K	I	L	L	K	G	1	0	0	0	0	1	2	0	0	1	4	1	0	0	0	0	0	0	0	0	0	10	0	1168.71	P48616	P48616	130	139	yes	yes	2	5.3863e-104	187.99	matching	MS/MS	matching	matching	MS/MS	MS/MS	matching	matching
ILLANFLAQTEALMR	IRNGLHHKILLANFLA	AQTEALMRGKSTEEAR	K	I	L	M	R	G	3	1	1	0	0	1	1	0	0	1	4	0	1	1	0	0	1	0	0	0	0	15	0	1702.94	Q3ZBD7;CON__Q3ZBD7	Q3ZBD7	424	438	no	no	2;3	0.00045027	119.54	matching	matching	matching	matching	matching	matching	matching	matching
ILLQGTPVAQMTEDAIDGER	PDTESETKILLQGTPV	EDAIDGERLKHLIQTP	K	I	L	E	R	L	2	1	0	2	0	2	2	2	0	2	2	0	1	0	1	0	2	0	0	1	0	20	0	2156.08	Q2UVX4;CON__Q2UVX4;G3X7A5	Q2UVX4	979	998	yes	no	2;3	0	225.69	MS/MS	MS/MS	MS/MS	MS/MS	MS/MS	MS/MS	MS/MS	MS/MS
ILSLAQDQVGGSAEK	WLTAFVLKILSLAQDQ	QVGGSAEKLQETATWL	K	I	L	E	K	L	2	0	0	1	0	2	1	2	0	1	2	1	0	0	0	2	0	0	0	1	0	15	0	1514.79	E1BH06;CON__P01030	E1BH06	1083	1097	yes	no	2	0	242.93	matching	MS/MS	matching	MS/MS	matching	MS/MS	matching	MS/MS
ILSLAQDQVGGSPEK	WLTAFVLKILSLAQDQ	QVGGSPEKLQETAMWL	K	I	L	E	K	L	1	0	0	1	0	2	1	2	0	1	2	1	0	0	1	2	0	0	0	1	0	15	0	1540.81	CON__ENSEMBL:ENSBTAP00000007350	CON__ENSEMBL:ENSBTAP00000007350	1084	1098	yes	yes	2	6.4727e-154	213	matching	matching	matching	MS/MS	MS/MS	MS/MS	MS/MS	matching
ILTCVYLHVFQDK	PQKQDIEKILTCVYLH	YLHVFQDKDSALLLQI	K	I	L	D	K	D	0	0	0	1	1	1	0	0	1	1	2	1	0	1	0	0	1	0	1	2	0	13	0	1634.85	E1BK38	E1BK38	951	963	yes	yes	2	0.038713	67.749	matching	matching	matching	matching	matching	MS/MS	matching	matching
ILTVEDHYYEGGIGEAVASAVVGEPGVTVTR	SARATKGRILTVEDHY	EPGVTVTRLAVSQVPR	R	I	L	T	R	L	3	1	0	1	0	0	4	5	1	2	1	0	0	0	1	1	3	0	2	6	0	31	0	3187.6	A7E3W4;A7Z014;Q6B855	A7E3W4	529	559	yes	no	3	1.4737e-12	78.128	matching	matching	matching	matching	MS/MS	MS/MS	matching	matching
ILVDQVTGVSR	YGRIITSRILVDQVTG	DQVTGVSRGVGFIRFD	R	I	L	S	R	G	0	1	0	1	0	1	0	1	0	1	1	0	0	0	0	1	1	0	0	3	0	11	0	1185.67	F1N4V6;A2VDK5	F1N4V6	156	166	yes	no	2	0.041144	68.536	matching	matching	matching	matching	matching	matching	matching	matching
ILWESASLLR	RNSAVRHRILWESASL	WESASLLRSEETKENE	R	I	L	L	R	S	1	1	0	0	0	0	1	0	0	1	3	0	0	0	0	2	0	1	0	0	0	10	0	1186.67	Q2UVX4;CON__Q2UVX4;G3X7A5	Q2UVX4	1310	1319	yes	no	2	1.2789e-117	200.71	matching	matching	matching	matching	matching	matching	matching	matching
IMDQVQQASMSSSGTNKNQLDGK	HKPFRVKKIMDQVQQA	NKNQLDGKTKKPTSPV	K	I	M	G	K	T	1	0	2	2	0	4	0	2	0	1	1	2	2	0	0	4	1	0	0	1	0	23	1	2466.15	F1MV51	F1MV51	1752	1774	yes	yes	3	0.041155	49.188	matching	matching	matching	matching	matching	matching	matching	matching
INIDLQVLEPEPELVYGDLR	GDDAKADKINIDLQVL	ELVYGDLRSSVTFDCS	K	I	N	L	R	S	0	1	1	2	0	1	3	1	0	2	4	0	0	0	2	0	0	0	1	2	0	20	0	2324.23	P81265;F6PQI6;F1MR22	P81265	231	250	yes	no	2;3	4.8338e-140	186.6	MS/MS	MS/MS	MS/MS	MS/MS	MS/MS	MS/MS	MS/MS	MS/MS
INLFDTPLETQYVR	NVNNSGLKINLFDTPL	PLETQYVRLVPIICHR	K	I	N	V	R	L	0	1	1	1	0	1	1	0	0	1	2	0	0	1	1	0	2	0	1	1	0	14	0	1707.88	Q95114;F1MXX6;G3MYW7	Q95114	233	246	yes	no	2	7.3387e-184	206.67	matching	MS/MS	MS/MS	matching	matching	MS/MS	matching	matching
INNVPAEGENEVNNELANR	RRTLSRMRINNVPAEG	VNNELANRMSLFYAEA	R	I	N	N	R	M	2	1	6	0	0	0	4	1	0	1	1	0	0	0	1	0	0	0	0	2	0	19	0	2094.99	Q2KJI3	Q2KJI3	168	186	yes	yes	2	3.3291e-26	159.18	matching	matching	matching	matching	matching	matching	matching	matching
INQNFGVPPMIEK				I	N	E	K		0	0	2	0	0	1	1	1	0	2	0	1	1	1	2	0	0	0	0	1	0	13	0	1485.77		REV__F1N234			yes	yes	2	0.0077004	99.539	matching	matching	matching	matching	matching	MS/MS	matching	matching
IPAFGSIPTEFR	TRGPSTYKIPAFGSIP	GSIPTEFRVSLLRDCP	K	I	P	F	R	V	1	1	0	0	0	0	1	1	0	2	0	0	0	2	2	1	1	0	0	0	0	12	0	1333.7	P80457;F1MUT3	P80457	1229	1240	yes	no	2	1.578e-05	149.49	matching	matching	matching	MS/MS	matching	matching	matching	matching
IPAVFK	KIIAEKTKIPAVFKID	TKIPAVFKIDALNENK	K	I	P	F	K	I	1	0	0	0	0	0	0	0	0	1	0	1	0	1	1	0	0	0	0	1	0	6	0	673.416	CON__P02754;P02754;G5E5H7	CON__P02754	78	83	yes	no	1	0.004114	64.398	matching	matching	matching	matching	matching	matching	matching	matching
IPAVFKIDALNENK	KIIAEKTKIPAVFKID	IDALNENKVLVLDTDY	K	I	P	N	K	V	2	0	2	1	0	0	1	0	0	2	1	2	0	1	1	0	0	0	0	1	0	14	1	1570.87	CON__P02754;P02754;G5E5H7	CON__P02754	78	91	yes	no	2;3	9.7632e-159	204.17	MS/MS	MS/MS	MS/MS	MS/MS	matching	matching	MS/MS	MS/MS
IPELLASGMVDSLTK	VKEQTGGKIPELLASG	GMVDSLTKLVLVNAIY	K	I	P	T	K	L	1	0	0	1	0	0	1	1	0	1	3	1	1	0	1	2	1	0	0	1	0	15	0	1572.84	Q1JPB0;G1K1L8	Q1JPB0	143	157	yes	no	2;3	1.1352e-118	184.87	matching	matching	matching	matching	matching	MS/MS	matching	matching
IPEVFLTK	FELSRKTRIPEVFLTK	IPEVFLTKILESTLKS	R	I	P	T	K	I	0	0	0	0	0	0	1	0	0	1	1	1	0	1	1	0	1	0	0	1	0	8	0	945.554	F1N5M2;CON__ENSEMBL:ENSBTAP00000018229	F1N5M2	355	362	yes	no	2	5.6361e-12	138.06	matching	MS/MS	MS/MS	MS/MS	MS/MS	matching	MS/MS	MS/MS
IPLQPNFQADQFQGK	LRAPPLSRIPLQPNFQ	QADQFQGKWYTVGVAG	R	I	P	G	K	W	1	0	1	1	0	4	0	1	0	1	1	1	0	2	2	0	0	0	0	0	0	15	0	1729.88	E1B6Z6	E1B6Z6	37	51	yes	yes	2;3	0	233.28	matching	MS/MS	MS/MS	MS/MS	MS/MS	MS/MS	matching	MS/MS
IPNGVYRPELSK	EITCDPPRIPNGVYRP	VYRPELSKYRGQDKIT	R	I	P	S	K	Y	0	1	1	0	0	0	1	1	0	1	1	1	0	0	2	1	0	0	1	1	0	12	1	1371.75	Q28085;CON__Q28085	Q28085	272	283	yes	no	3	0.011078	84.605	matching	MS/MS	matching	matching	matching	matching	matching	matching
IQAIELEDLLR	ELHLDHNKIQAIELED	IELEDLLRYSKLYRLG	K	I	Q	L	R	Y	1	1	0	1	0	1	2	0	0	2	3	0	0	0	0	0	0	0	0	0	0	11	0	1311.74	P21809	P21809	242	252	yes	yes	2	1.2793e-102	193.62	matching	MS/MS	matching	matching	matching	matching	matching	matching
IQEEGTEVELTGK	MKIEVEAKIQEEGTEV	TEVELTGKGATEITTT	K	I	Q	G	K	G	0	0	0	0	0	1	4	2	0	1	1	1	0	0	0	0	2	0	0	1	0	13	0	1431.71	Q7SIH1;CON__ENSEMBL:ENSBTAP00000024146	Q7SIH1	326	338	yes	no	2	3.0609e-268	233.52	matching	MS/MS	matching	MS/MS	MS/MS	matching	matching	MS/MS
IQEVTTSLVPGAVR	IDKAISEKIQEVTTSL	SLVPGAVRIIGLDCRS	K	I	Q	V	R	I	1	1	0	0	0	1	1	1	0	1	1	0	0	0	1	1	2	0	0	3	0	14	0	1468.82	Q762I5	Q762I5	32	45	yes	yes	2	5.0795e-79	174.24	matching	matching	matching	MS/MS	MS/MS	MS/MS	matching	matching
IQGGSVVEMQGDEMTR	________________	MQGDEMTRIIWELIKE	K	I	Q	T	R	I	0	1	0	1	0	2	2	3	0	1	0	0	2	0	0	1	1	0	0	2	0	16	0	1735.79	Q9XSG3	Q9XSG3	5	20	yes	yes	2	4.6657e-21	137.91	MS/MS	MS/MS	matching	matching	matching	matching	MS/MS	MS/MS
IQHQDWTGGK	YRVVSALRIQHQDWTG	HQDWTGGKEFKCKVHN	R	I	Q	G	K	E	0	0	0	1	0	2	0	2	1	1	0	1	0	0	0	0	1	1	0	0	0	10	0	1168.56	CON__ENSEMBL:ENSBTAP00000024462;CON__ENSEMBL:ENSBTAP00000024466	CON__ENSEMBL:ENSBTAP00000024462	278	287	yes	no	2	0.029863	76.332	matching	matching	matching	matching	matching	MS/MS	matching	matching
IQITSLGPSRSMDLEMKQLQCK	VAQVTVPRIQITSLGP	EMKQLQCKLKNATNEL	R	I	Q	C	K	L	0	1	0	1	1	3	1	1	0	2	3	2	2	0	1	3	1	0	0	0	0	22	2	2562.3	E1BMK9	E1BMK9	1082	1103	yes	yes	3	0.034662	42.348	matching	matching	matching	matching	matching	matching	matching	matching
IQLEDWNGR	STIPYVLRIQLEDWNG	QLEDWNGRTSTADYAS	R	I	Q	G	R	T	0	1	1	1	0	1	1	1	0	1	1	0	0	0	0	0	0	1	0	0	0	9	0	1129.55	Q3SZZ9;F1MGU7;P12799	Q3SZZ9	272	280	yes	no	2	2.2462e-12	163.38	matching	matching	matching	matching	matching	MS/MS	matching	matching
IQLYDPILQIHK	FPLPLLRKIQLYDPIL	DPILQIHKDFLFLGTN	K	I	Q	H	K	D	0	0	0	1	0	2	0	0	1	3	2	1	0	0	1	0	0	0	1	0	0	12	0	1479.84	Q2TBI0;F1MNN7	Q2TBI0	456	467	yes	no	2;3	1.3859e-76	185.3	matching	MS/MS	matching	matching	MS/MS	MS/MS	matching	matching
IQNQLMSR	YDENNWKKIQNQLMSR	IQNQLMSRRENIPVIN	K	I	Q	S	R	R	0	1	1	0	0	2	0	0	0	1	1	0	1	0	0	1	0	0	0	0	0	8	0	988.512	P79098;F1MN84	P79098	641	648	yes	no	2	0.02766	57.177	matching	matching	matching	matching	matching	matching	matching	matching
IQNQLMSRR	YDENNWKKIQNQLMSR	QNQLMSRRENIPVINR	K	I	Q	R	R	E	0	2	1	0	0	2	0	0	0	1	1	0	1	0	0	1	0	0	0	0	0	9	1	1144.61	P79098;F1MN84	P79098	641	649	yes	no	2	0.03872	44.753	matching	matching	MS/MS	matching	matching	matching	matching	matching
IQPSGGTNINEALLR	DAKNYIEKIQPSGGTN	NINEALLRAIFILNEA	K	I	Q	L	R	A	1	1	2	0	0	1	1	2	0	2	2	0	0	0	1	1	1	0	0	0	0	15	0	1581.85	F1MNW4;CON__Q9TRI1	F1MNW4	380	394	yes	no	2	6.9515e-06	137.79	matching	matching	matching	matching	matching	matching	matching	matching
IQQNLDQLR	KAKALHERIQQNLDQL	QQNLDQLREELSAFAG	R	I	Q	L	R	E	0	1	1	1	0	3	0	0	0	1	2	0	0	0	0	0	0	0	0	0	0	9	0	1126.61	A4FUZ9	A4FUZ9	246	254	yes	yes	2	4.6032e-10	138.08	matching	matching	matching	matching	matching	matching	matching	matching
IQQQVDSPMNLK	WVVTEDGKIQQQVDSP	VDSPMNLKHPHDLVIL	K	I	Q	L	K	H	0	0	1	1	0	3	0	0	0	1	1	1	1	0	1	1	0	0	0	1	0	12	0	1399.71	E1BLC6	E1BLC6	50	61	yes	yes	3	0.0070977	98.898	matching	matching	matching	matching	matching	matching	matching	matching
IQQYSGKQTFYLTLRYGR	RPQELFMRIQQYSGKQ	YLTLRYGRVLDQERFT	R	I	Q	G	R	V	0	2	0	0	0	3	0	2	0	1	2	1	0	1	0	1	2	0	3	0	0	18	2	2221.16	Q5EA03	Q5EA03	177	194	yes	yes	2	0.0021233	79.317	matching	matching	matching	matching	matching	matching	matching	matching
IQTVSFAGGPMPQNSPMER	WGHPRGYRIQTVSFAG	PQNSPMERAFSWGRYQ	R	I	Q	E	R	A	1	1	1	0	0	2	1	2	0	1	0	0	2	1	3	2	1	0	0	1	0	19	0	2045.97	Q29437	Q29437	604	622	yes	yes	2;3	1.4204e-130	181.6	matching	matching	matching	matching	matching	MS/MS	matching	matching
IQVHYYEDGNVQLVSHK	AQVVGVLKIQVHYYED	NVQLVSHKDVQDSVTV	K	I	Q	H	K	D	0	0	1	1	0	2	1	1	2	1	1	1	0	0	0	1	0	0	2	3	0	17	0	2028.01	A4FUA8;Q5E997	A4FUA8	194	210	yes	no	3	0.001911	75.911	matching	matching	matching	matching	matching	matching	matching	matching
IQVLQQQADDAEER	VTEAMKCKIQVLQQQA	QADDAEERAKRLQQKV	K	I	Q	E	R	A	2	1	0	2	0	4	2	0	0	1	1	0	0	0	0	0	0	0	0	1	0	14	0	1641.8	F1MV90	F1MV90	14	27	yes	yes	2	0	263.98	matching	matching	matching	matching	MS/MS	MS/MS	matching	matching
IQVLVEPDHFK	FESGKPFKIQVLVEPD	LVEPDHFKVAVNDAHL	K	I	Q	F	K	V	0	0	0	1	0	1	1	0	1	1	1	1	0	1	1	0	0	0	0	2	0	11	0	1323.72	A6QLZ0	A6QLZ0	215	225	yes	yes	3	0.022584	67.385	matching	matching	matching	matching	matching	matching	matching	matching
IQYQLVDISQDNALR	TRILDGKRIQYQLVDI	ISQDNALRDEMRALAG	R	I	Q	L	R	D	1	1	1	2	0	3	0	0	0	2	2	0	0	0	0	1	0	0	1	1	0	15	0	1774.92	Q3ZCL8;G3X6S5	Q3ZCL8	33	47	yes	no	2	7.4147e-06	124.29	matching	matching	matching	matching	matching	matching	matching	matching
IQYQLVDISQDNALRDEMR	TRILDGKRIQYQLVDI	NALRDEMRALAGNPKA	R	I	Q	M	R	A	1	2	1	3	0	3	1	0	0	2	2	0	1	0	0	1	0	0	1	1	0	19	1	2306.13	Q3ZCL8;G3X6S5	Q3ZCL8	33	51	yes	no	3	2.528e-05	110.97	matching	matching	matching	matching	MS/MS	MS/MS	matching	matching
IRDPFIHEISKIAMGMR	ELLLLMDKIRDPFIHE	SKIAMGMRTASQFTRD	K	I	R	M	R	T	1	2	0	1	0	0	1	1	1	4	0	1	2	1	1	1	0	0	0	0	0	17	2	2013.07	G3N0A1	G3N0A1	615	631	yes	yes	2	0.0041584	72.428	matching	matching	matching	MS/MS	matching	MS/MS	matching	matching
IRELESQISELQEDLESER	QKNMALKKIRELESQI	QEDLESERAARNKAEK	K	I	R	E	R	A	0	2	0	1	0	2	6	0	0	2	3	0	0	0	0	3	0	0	0	0	0	19	1	2302.13	F1MQ37	F1MQ37	1106	1124	yes	yes	3	2.1941e-09	128.79	matching	matching	matching	matching	matching	MS/MS	matching	matching
IRPYFPEQ	SMKKMSMKIRPYFPEQ	IRPYFPEQ________	K	I	R	E	Q	-	0	1	0	0	0	1	1	0	0	1	0	0	0	1	2	0	0	0	1	0	0	8	1	1048.53	F1MAV0;CON__P02676;P02676	F1MAV0	488	495	yes	no	2	7.5106e-23	160.63	matching	MS/MS	matching	MS/MS	MS/MS	MS/MS	matching	MS/MS
ISELDAFLKEPDLNEANLSNLK	LGSYFPKKISELDAFL	EANLSNLKAPLDIPVP	K	I	S	L	K	A	2	0	3	2	0	0	3	0	0	1	5	2	0	1	1	2	0	0	0	0	0	22	1	2472.27	Q4U5R3;Q2KJE7	Q4U5R3	37	58	yes	no	3	3.5382e-13	119.37	matching	matching	matching	matching	matching	MS/MS	matching	matching
ISEQFTAMFR	AIQELFKRISEQFTAM	EQFTAMFRRKAFLHWY	R	I	S	F	R	R	1	1	0	0	0	1	1	0	0	1	0	0	1	2	0	1	1	0	0	0	0	10	0	1228.59	Q2KJD0;Q6B856;Q3MHM5;E1BJB1;Q2T9S0;Q3ZBU7	Q2KJD0	381	390	yes	no	2	0.023031	80.871	matching	matching	matching	matching	matching	MS/MS	matching	matching
ISFDEFIK	GDLDQDGKISFDEFIK	ISFDEFIKVFHGLKST	K	I	S	I	K	V	0	0	0	1	0	0	1	0	0	2	0	1	0	2	0	1	0	0	0	0	0	8	0	997.512	F1MYX5	F1MYX5	69	76	yes	yes	2	4.0637e-15	140.35	matching	matching	matching	matching	matching	MS/MS	matching	matching
ISHELDSASSEVN	EDKHLKIRISHELDSA	DSASSEVN________	R	I	S	V	N	-	1	0	1	1	0	0	2	0	1	1	1	0	0	0	0	4	0	0	0	1	0	13	0	1386.63	CON__P31096;F1MI46;P31096;P31098	CON__P31096	250	262	yes	no	2	4.0263e-20	149.69	MS/MS	MS/MS	MS/MS	matching	MS/MS	MS/MS	MS/MS	MS/MS
ISLPLPNFSSLNLR	LLEGEESRISLPLPNF	NFSSLNLRETNLDSLP	R	I	S	L	R	E	0	1	2	0	0	0	0	0	0	1	4	0	0	1	2	3	0	0	0	0	0	14	0	1569.89	P48616	P48616	411	424	yes	yes	2	0.00083307	122.78	matching	matching	matching	matching	matching	matching	matching	matching
ISNVFTFAFR	YNNSVDPRISNVFTFA	NVFTFAFRFGHMEVPS	R	I	S	F	R	F	1	1	1	0	0	0	0	0	0	1	0	0	0	3	0	1	1	0	0	1	0	10	0	1200.63	P80025;G3MXZ0	P80025	456	465	yes	no	2	1.2079e-23	158.3	MS/MS	matching	matching	matching	matching	matching	matching	matching
ISNYVASLANK	MDMNAEGKISNYVASL	YVASLANKIQAERKQG	K	I	S	N	K	I	2	0	2	0	0	0	0	0	0	1	1	1	0	0	0	2	0	0	1	1	0	11	0	1178.63	E1BCU6	E1BCU6	214	224	yes	yes	2	3.7323e-05	136.93	matching	matching	MS/MS	matching	matching	matching	matching	matching
ISQATAQIKNLMSQLGTKQDSSK	TCSGNIQRISQATAQI	GTKQDSSKLQENLQQL	R	I	S	S	K	L	2	0	1	1	0	4	0	1	0	2	2	3	1	0	0	4	2	0	0	0	0	23	2	2476.3	A7MAZ2	A7MAZ2	36	58	yes	yes	3	0.0064401	67.227	matching	matching	matching	MS/MS	matching	matching	matching	matching
ISQLTNMGPTK	EYWLGNDRISQLTNMG	LTNMGPTKLLIEMEDW	R	I	S	T	K	L	0	0	1	0	0	1	0	1	0	1	1	1	1	0	1	1	2	0	0	0	0	11	0	1188.62	F1MAV0;CON__P02676;P02676	F1MAV0	333	343	yes	no	2	0	232.78	matching	matching	matching	matching	matching	MS/MS	matching	matching
ISSDLDGHPVPK	SELLNLRKISSDLDGH	LDGHPVPKQAFTDVAT	K	I	S	P	K	Q	0	0	0	2	0	0	0	1	1	1	1	1	0	0	2	2	0	0	0	1	0	12	0	1263.65	A7E3W4;A7Z014	A7E3W4	76	87	yes	no	2;3	3.7102e-18	147.58	matching	matching	matching	matching	matching	MS/MS	matching	matching
ISSEIYNDANDLLTK	FEAQADTKISSEIYND	DANDLLTKVKNDKSVS	K	I	S	T	K	V	1	0	2	2	0	0	1	0	0	2	2	1	0	0	0	2	1	0	1	0	0	15	0	1694.84	F1MX87	F1MX87	228	242	yes	yes	2	2.6562e-46	160.03	matching	matching	matching	matching	matching	matching	matching	matching
ISTSLPVLDLIDAIQPGSINYDLLK	ISSFKDPKISTSLPVL	SINYDLLKTENLNEEE	K	I	S	L	K	T	1	0	1	3	0	1	0	1	0	4	5	1	0	0	2	3	1	0	1	1	0	25	0	2697.48	F1MYX5	F1MYX5	546	570	yes	yes	2;3	4.0138e-52	144.57	matching	matching	matching	MS/MS	MS/MS	MS/MS	matching	matching
ISVNNVLPVFDNLMQQK	ILGMAYPRISVNNVLP	FDNLMQQKLVDKNVFS	R	I	S	Q	K	L	0	0	3	1	0	2	0	0	0	1	2	1	1	1	1	1	0	0	0	3	0	17	0	1958.03	F1MMR6;P80209	F1MMR6	206	222	yes	no	2;3	9.9722e-148	187.16	matching	matching	matching	matching	matching	MS/MS	matching	matching
ISYIIGK	DLWGEKPKISYIIGKD	KISYIIGKDTWVELWP	K	I	S	G	K	D	0	0	0	0	0	0	0	1	0	3	0	1	0	0	0	1	0	0	1	0	0	7	0	792.475	Q2UVX4;CON__Q2UVX4;G3X7A5	Q2UVX4	1616	1622	yes	no	1	0.035563	71.949	matching	MS/MS	matching	matching	matching	matching	matching	matching
ITDATAGLMGEEDGR	IIVAAPLRITDATAGL	LMGEEDGRVYVFNGKQ	R	I	T	G	R	V	2	1	0	2	0	0	2	3	0	1	1	0	1	0	0	0	2	0	0	0	0	15	0	1534.69	P80109;F1MNM2	P80109	742	756	yes	no	2	0.0052551	91.355	matching	matching	matching	matching	matching	matching	matching	matching
ITDQGLEYVAQEELLALQSK	ANPGLVVRITDQGLEY	ELLALQSKLHKVTLPD	R	I	T	S	K	L	2	0	0	1	0	3	3	1	0	1	4	1	0	0	0	1	1	0	1	1	0	20	0	2247.16	Q2TBI0;F1MNN7	Q2TBI0	34	53	yes	no	2;3	0	230.62	matching	MS/MS	MS/MS	MS/MS	MS/MS	MS/MS	matching	MS/MS
ITDQGLEYVAQEELLALQSKLHK	ANPGLVVRITDQGLEY	ALQSKLHKVTLPDFNG	R	I	T	H	K	V	2	0	0	1	0	3	3	1	1	1	5	2	0	0	0	1	1	0	1	1	0	23	1	2625.4	Q2TBI0;F1MNN7	Q2TBI0	34	56	yes	no	4	0.0007032	60.561	matching	matching	matching	matching	matching	matching	matching	matching
ITDVIPPQAINEFTVLVLVNTIYFK	ISNKTEGRITDVIPPQ	LVNTIYFKGLWKSKFS	R	I	T	F	K	G	1	0	2	1	0	1	1	0	0	4	2	1	0	2	2	0	3	0	1	4	0	25	0	2846.58	P41361;F1MSZ6;CON__P41361	P41361	231	255	yes	no	3	6.4715e-05	64.349	matching	matching	matching	matching	matching	matching	matching	matching
ITGFLEPGK	MLTFNTSKITGFLEPG	TGFLEPGKIQVELKES	K	I	T	G	K	I	0	0	0	0	0	0	1	2	0	1	1	1	0	1	1	0	1	0	0	0	0	9	0	960.528	Q2TBI0;F1MNN7	Q2TBI0	398	406	yes	no	2	8.2496e-08	132.88	matching	MS/MS	matching	matching	MS/MS	MS/MS	matching	matching
ITGLDPAGPNFEYAEAPSR	LTNKKVNRITGLDPAG	EYAEAPSRLSPDDADF	R	I	T	S	R	L	3	1	1	1	0	0	2	2	0	1	1	0	0	1	3	1	1	0	1	0	0	19	0	2003.96	P11151	P11151	182	200	yes	yes	2	9.8474e-96	162.42	MS/MS	matching	matching	matching	matching	matching	matching	MS/MS
ITVDIGTPS	QRYPLYTKITVDIGTP	TVDIGTPS________	K	I	T	P	S	-	0	0	0	1	0	0	0	1	0	2	0	0	0	0	1	1	2	0	0	1	0	9	0	901.476	P08037	P08037	394	402	yes	yes	1	0.028744	50.966	matching	matching	matching	matching	matching	matching	matching	matching
ITVVAGEHNTEKPEPTEQK	HCIKPGVKITVVAGEH	KPEPTEQKRNVIRAIP	K	I	T	Q	K	R	1	0	1	0	0	1	4	1	1	1	0	2	0	0	2	0	3	0	0	2	0	19	1	2106.06	F1MBC5;P00741	F1MBC5	138	156	yes	no	3	1.1039e-08	122.08	matching	matching	MS/MS	MS/MS	matching	matching	matching	matching
ITYGETGGSSPVQEFTVPGSK	AVTVRYYRITYGETGG	EFTVPGSKSTATISGL	R	I	T	S	K	S	0	0	0	0	0	1	2	4	0	1	0	1	0	1	2	3	3	0	1	2	0	21	0	2140.03	B8Y9S9;P07589;G5E5A9;B8Y9T0	B8Y9S9	1481	1501	yes	no	2	1.7746e-31	144.74	matching	MS/MS	matching	MS/MS	matching	MS/MS	matching	matching
IVADKDYSVTANSK	SLFLQTPKIVADKDYS	YSVTANSKIVVVTAGV	K	I	V	S	K	I	2	0	1	2	0	0	0	0	0	1	0	2	0	0	0	2	1	0	1	2	0	14	1	1509.77	Q5E9B1	Q5E9B1	78	91	yes	yes	3	0.0027739	88.78	matching	matching	matching	matching	matching	MS/MS	matching	matching
IVAEEFLK	LSVNARARIVAEEFLK	IVAEEFLKNF______	R	I	V	L	K	N	1	0	0	0	0	0	2	0	0	1	1	1	0	1	0	0	0	0	0	1	0	8	0	947.533	Q148J6	Q148J6	159	166	yes	yes	2	0.023106	75.738	matching	matching	matching	matching	matching	matching	matching	matching
IVEGQDAEVGLSPWQVMLFR	FESYIEGRIVEGQDAE	PWQVMLFRKSPQELLC	R	I	V	F	R	K	1	1	0	1	0	2	2	2	0	1	2	0	1	1	1	1	0	1	0	3	0	20	0	2273.15	P00735;CON__P00735	P00735	367	386	yes	no	2;3	3.4054e-38	153.21	matching	matching	matching	matching	matching	MS/MS	matching	matching
IVGYLDEEGVLDQNR	LAREVSNKIVGYLDEE	EGVLDQNRSLLFMQWG	K	I	V	N	R	S	0	1	1	2	0	1	2	2	0	1	2	0	0	0	0	0	0	0	1	2	0	15	0	1718.85	P80025;G3MXZ0	P80025	199	213	yes	no	2	2.9304e-100	180.95	MS/MS	matching	matching	matching	matching	MS/MS	MS/MS	matching
IVIDLFK	TTGITGQRIVIDLFKH	RIVIDLFKHQGTITVN	R	I	V	F	K	H	0	0	0	1	0	0	0	0	0	2	1	1	0	1	0	0	0	0	0	1	0	7	0	846.521	CON__ENSEMBL:ENSBTAP00000018574;A6QPP2	CON__ENSEMBL:ENSBTAP00000018574	429	435	yes	no	2	4.9516e-07	111.65	matching	matching	matching	matching	MS/MS	MS/MS	matching	matching
IVLLDESFHPLNELVPLVYVEDPK	PEQTVKFRIVLLDESF	LVYVEDPKGNRIAQWQ	R	I	V	P	K	G	0	0	1	2	0	0	3	0	1	1	5	1	0	1	3	1	0	0	1	4	0	24	0	2777.49	Q7SIH1;CON__ENSEMBL:ENSBTAP00000024146	Q7SIH1	148	171	yes	no	3	1.6007e-33	137.39	matching	matching	matching	MS/MS	MS/MS	MS/MS	matching	matching
IVQGVQLRGR	AHRSWVQRIVQGVQLR	QGVQLRGRSQRGGPTG	R	I	V	G	R	S	0	2	0	0	0	2	0	2	0	1	1	0	0	0	0	0	0	0	0	2	0	10	1	1124.68	E1BNJ9	E1BNJ9	288	297	yes	yes	2	0.026635	70.056	matching	matching	matching	matching	matching	matching	matching	matching
IVQTYHVNMAGTNPYTTITPQEINGK	GIHNEVSKIVQTYHVN	TPQEINGKWDHVRQLV	K	I	V	G	K	W	1	0	3	0	0	2	1	2	1	3	0	1	1	0	2	0	5	0	2	2	0	26	0	2889.43	Q3B7N2	Q3B7N2	578	603	yes	yes	3	0.00025748	59.789	matching	matching	matching	matching	matching	matching	matching	matching
IVSGISEGQVETVQSSPITFR	SWFRDGKRIVSGISEG	QSSPITFRAYSMLTIT	R	I	V	F	R	A	0	1	0	0	0	2	2	2	0	3	0	0	0	1	1	4	2	0	0	3	0	21	0	2233.16	CON__Q1RMK2;G5E5T5;G5E513	CON__Q1RMK2	302	322	yes	no	2;3	0	231.5	matching	MS/MS	MS/MS	MS/MS	MS/MS	MS/MS	matching	matching
IVVVTAGVR	YSVTANSKIVVVTAGV	VVVTAGVRQQEGESRL	K	I	V	V	R	Q	1	1	0	0	0	0	0	1	0	1	0	0	0	0	0	0	1	0	0	4	0	9	0	912.576	Q5E9B1	Q5E9B1	92	100	yes	yes	2	5.5406e-09	156.35	matching	matching	matching	matching	matching	matching	matching	matching
IYDSPEMPENEATFAITAGGIGDAKE	RGELRIAKIYDSPEMP	GGIGDAKE________	K	I	Y	K	E	-	4	0	1	2	0	0	4	3	0	3	0	1	1	1	2	1	2	0	1	0	0	26	1	2725.24	F1N1D2	F1N1D2	314	339	yes	yes	3	0.037796	41.017	matching	matching	matching	matching	matching	matching	matching	matching
IYEDHDATQQLQGFYEQVANPLLR	ENNGRVQRIYEDHDAT	QVANPLLRDVELLYPR	R	I	Y	L	R	D	2	1	1	2	0	4	2	1	1	1	3	0	0	1	1	0	1	0	2	1	0	24	0	2847.38	Q0VCM5;F1MMP5;CON__Q0VCM5	Q0VCM5	453	476	yes	no	3	1.3231e-78	158.33	matching	MS/MS	MS/MS	matching	matching	matching	matching	matching
IYGNQDTSVQLK	DNRGIAQRIYGNQDTS	QDTSVQLKKFYNQVST	R	I	Y	L	K	K	0	0	1	1	0	2	0	1	0	1	1	1	0	0	0	1	1	0	1	1	0	12	0	1364.69	F1MNW4;CON__Q9TRI1	F1MNW4	476	487	yes	no	2	1.0196e-72	189.24	matching	matching	matching	matching	matching	matching	matching	matching
IYMADLESALHYILR	WKVADRSKIYMADLES	SALHYILRIEVGKFSV	K	I	Y	L	R	I	2	1	0	1	0	0	1	0	1	2	3	0	1	0	0	1	0	0	2	0	0	15	0	1806.93	F1MM32	F1MM32	300	314	yes	yes	3	0.0098876	68.171	matching	matching	matching	matching	matching	MS/MS	matching	matching
IYVDDGLISLLVK	KVVDVGSKIYVDDGLI	GLISLLVKQKGPDFLV	K	I	Y	V	K	Q	0	0	0	2	0	0	0	1	0	2	3	1	0	0	0	1	0	0	1	2	0	13	0	1446.83	A5D984	A5D984	174	186	yes	yes	2	0	235.31	matching	matching	matching	MS/MS	MS/MS	MS/MS	matching	matching
KADAVTLDGGMVFEAGR	CIRAIAEKKADAVTLD	GMVFEAGRDPYKLRPV	K	K	A	G	R	D	3	1	0	2	0	0	1	3	0	0	1	1	1	1	0	0	1	0	0	2	0	17	1	1735.86	P24627	P24627	72	88	yes	yes	2;3	4.4975e-225	208.07	MS/MS	MS/MS	MS/MS	MS/MS	MS/MS	MS/MS	matching	MS/MS
KADAVTLDGGMVFEAGRDPYK	CIRAIAEKKADAVTLD	EAGRDPYKLRPVAAEI	K	K	A	Y	K	L	3	1	0	3	0	0	1	3	0	0	1	2	1	1	1	0	1	0	1	2	0	21	2	2239.09	P24627	P24627	72	92	yes	yes	2;3;4	5.563e-53	151.28	MS/MS	MS/MS	MS/MS	MS/MS	MS/MS	MS/MS	matching	MS/MS
KADMVNEDLLSDGTNENESGFWDSFK	IIKVKVQKKADMVNED	SGFWDSFKWGFTGGQK	K	K	A	F	K	W	1	0	3	4	0	0	3	2	0	0	2	2	1	2	0	3	1	1	0	1	0	26	1	2947.28	E1B9R3	E1B9R3	1212	1237	yes	yes	3	0.020223	43.349	matching	matching	matching	matching	matching	matching	matching	matching
KALQENDNVCAQLSAGSTDPGK	NLGIFYFKKALQENDN	AGSTDPGKKFSGRPMC	K	K	A	G	K	K	3	0	2	2	1	2	1	2	0	0	2	2	0	0	1	2	1	0	0	1	0	22	1	2302.09	A4IFB6	A4IFB6	318	339	no	no		1	NaN	matching	matching	matching	matching	matching	matching	matching	matching
KALQENDNVCAQLSAGSTDPGKK	NLGIFYFKKALQENDN	GSTDPGKKFSGRPMCT	K	K	A	K	K	F	3	0	2	2	1	2	1	2	0	0	2	3	0	0	1	2	1	0	0	1	0	23	2	2430.18	A4IFB6	A4IFB6	318	340	yes	yes	2	0.0015603	81.878	matching	matching	matching	matching	matching	matching	matching	matching
KANEGLTWNSLK	YLAVAVVKKANEGLTW	GLTWNSLKDKKSCHTA	K	K	A	L	K	D	1	0	2	0	0	0	1	1	0	0	2	2	0	0	0	1	1	1	0	0	0	12	1	1359.71	P24627	P24627	460	471	yes	yes	2;3	3.4387e-24	162.48	matching	matching	matching	matching	matching	MS/MS	matching	matching
KDAEAFYASEVLSINFK	LKLLDKFRKDAEAFYA	EVLSINFKDSEAAVKL	R	K	D	F	K	D	3	0	1	1	0	0	2	0	0	1	1	2	0	2	0	2	0	0	1	1	0	17	1	1930.97	A0A0A0MPA0	A0A0A0MPA0	152	168	yes	yes	3	0.0019645	58.246	matching	matching	matching	matching	matching	matching	matching	matching
KDAEAFYASEVLSTNFK	LKLLDKFRKDAEAFYA	EVLSTNFKDSEAAVKL	R	K	D	F	K	D	3	0	1	1	0	0	2	0	0	0	1	2	0	2	0	2	1	0	1	1	0	17	1	1918.93	CON__REFSEQ:XP_001252647;A0A0A0MP92;CON__A2I7N3;A2I7N3	CON__REFSEQ:XP_001252647	152	168	no	no	3	4.5704e-05	105.63	matching	MS/MS	matching	matching	matching	MS/MS	matching	matching
KDDPLTNLNTAFDVAEK	LIDYGKLRKDDPLTNL	TAFDVAEKYLDIPKML	R	K	D	E	K	Y	2	0	2	3	0	0	1	0	0	0	2	2	0	1	1	0	2	0	0	1	0	17	1	1889.94	Q3B7N2	Q3B7N2	198	214	yes	yes	2	0.026711	93.753	matching	matching	matching	matching	matching	matching	matching	matching
KDDPVTNLNNAFEVAEK	LIEYDKLRKDDPVTNL	NAFEVAEKYLDIPKML	R	K	D	E	K	Y	2	0	3	2	0	0	2	0	0	0	1	2	0	1	1	0	1	0	0	2	0	17	1	1902.93	A5D7D1	A5D7D1	217	233	yes	yes	3	1.9031e-16	142.4	matching	matching	matching	matching	matching	matching	matching	matching
KDLYANTVLSGGTTMYPGIADR	MKCDVDIRKDLYANTV	MYPGIADRMQKEITAL	R	K	D	D	R	M	2	1	1	2	0	0	0	3	0	1	2	1	1	0	1	1	3	0	2	1	0	22	1	2342.16	P63258;P60712	P63258	291	312	yes	no	3	3.3742e-82	163.04	matching	MS/MS	matching	matching	MS/MS	MS/MS	matching	matching
KDPEGLFLQDNIVAEFSVDENGHMSATAK	GTWYAMAKKDPEGLFL	GHMSATAKGRVRLLNN	K	K	D	A	K	G	3	0	2	3	0	1	3	2	1	1	2	2	1	2	1	2	1	0	0	2	0	29	1	3161.5	P18902;G1K122	P18902	30	58	yes	no	3;4	5.6432e-11	92.716	matching	matching	matching	matching	matching	MS/MS	matching	matching
KDTIIKPLLVEPEGLEK	PVVPEHGRKDTIIKPL	VEPEGLEKEVIFNSLL	R	K	D	E	K	E	0	0	0	1	0	0	3	1	0	2	3	3	0	0	2	0	1	0	0	1	0	17	2	1921.11	Q7SIH1;CON__ENSEMBL:ENSBTAP00000024146	Q7SIH1	897	913	yes	no	3	5.7258e-09	138.81	matching	matching	matching	matching	matching	matching	matching	matching
KDYDTTPPVVR	ALLALLARKDYDTTPP	DTTPPVVRWLNEQRYY	R	K	D	V	R	W	0	1	0	2	0	0	0	0	0	0	0	1	0	0	2	0	2	0	1	2	0	11	1	1289.66	Q2UVX4;CON__Q2UVX4;G3X7A5	Q2UVX4	1243	1253	yes	no	2;3	7.1699e-214	212.09	matching	MS/MS	MS/MS	MS/MS	MS/MS	MS/MS	MS/MS	matching
KEDYNETAPMLEQAISPK	VGVDGAEKKEDYNETA	LEQAISPKPQSQKKNE	K	K	E	P	K	P	2	0	1	1	0	1	3	0	0	1	1	2	1	0	2	1	1	0	1	0	0	18	1	2062.99	E1BGZ9	E1BGZ9	298	315	yes	yes	2	0.0013011	87.447	matching	matching	matching	matching	matching	matching	matching	matching
KEEAPSLRPVPPPISGGGYR	GHRPYDKKKEEAPSLR	PISGGGYRARPATATV	K	K	E	Y	R	A	1	2	0	0	0	0	2	3	0	1	1	1	0	0	5	2	0	0	1	1	0	20	2	2106.12	F1MAV0;CON__P02676;P02676	F1MAV0	57	76	yes	no	2;3;4	5.7498e-22	132.25	matching	MS/MS	matching	matching	MS/MS	matching	matching	MS/MS
KEEELQAALAR	ELKMQLAKKEEELQAA	ELQAALARVEEETTQK	K	K	E	A	R	V	3	1	0	0	0	1	3	0	0	0	2	1	0	0	0	0	0	0	0	0	0	11	1	1256.67	F1MQ37;F1MM57	F1MQ37	1081	1091	yes	no	3	0.0081486	91.701	matching	matching	matching	matching	matching	matching	matching	matching
KEFLDVIK	PEVTQEQKKEFLDVIK	KEFLDVIKCIGIQESE	K	K	E	I	K	C	0	0	0	1	0	0	1	0	0	1	1	2	0	1	0	0	0	0	0	1	0	8	1	990.575	Q5GN72;Q3SZR3;CON__Q3SZR3	Q5GN72	158	165	yes	no	2	6.9742e-19	159.58	matching	matching	MS/MS	MS/MS	matching	MS/MS	matching	matching
KELAQVLLQK	VESTHSRKKELAQVLL	LAQVLLQKVLAHHREQ	K	K	E	Q	K	V	1	0	0	0	0	2	1	0	0	0	3	2	0	0	0	0	0	0	0	1	0	10	1	1168.72	A6QQK5	A6QQK5	118	127	yes	yes	2	0.0067365	106.62	matching	matching	matching	matching	MS/MS	matching	matching	matching
KELQHKIDEMEEK	QQKGQAEKKELQHKID	KIDEMEEKEQELQAKI	K	K	E	E	K	E	0	0	0	1	0	1	4	0	1	1	1	3	1	0	0	0	0	0	0	0	0	13	2	1655.82	E1BMC6	E1BMC6	275	287	yes	yes	2	0.0098689	94.122	matching	matching	matching	matching	matching	matching	matching	matching
KEMDKMIEDLELSNK	SMAQEEIRKEMDKMIE	EDLELSNKRHSLVQTL	R	K	E	N	K	R	0	0	1	2	0	0	3	0	0	1	2	3	2	0	0	1	0	0	0	0	0	15	2	1821.89	G3N055;G3MWN6	G3N055	1068	1082	yes	no	2	0.014954	75.911	matching	matching	matching	matching	matching	matching	matching	matching
KEPALLELEGK	DPPKPVAKKEPALLEL	ALLELEGKKWRVENQE	K	K	E	G	K	K	1	0	0	0	0	0	3	1	0	0	3	2	0	0	1	0	0	0	0	0	0	11	1	1225.69	A6QLB7;Q3SYV4	A6QLB7	313	323	no	no	3	1.7752e-05	133.42	matching	matching	matching	matching	matching	MS/MS	matching	matching
KEPALLELEGKK	DPPKPVAKKEPALLEL	LLELEGKKWRVENQEN	K	K	E	K	K	W	1	0	0	0	0	0	3	1	0	0	3	3	0	0	1	0	0	0	0	0	0	12	2	1353.79	A6QLB7;Q3SYV4	A6QLB7	313	324	no	no	3	0.0094476	152.96	matching	matching	matching	matching	matching	matching	matching	matching
KEPISDILK	GLSFYQERKEPISDIL	EPISDILKLKTHLPTF	R	K	E	L	K	L	0	0	0	1	0	0	1	0	0	2	1	2	0	0	1	1	0	0	0	0	0	9	1	1041.61	F1MNS5	F1MNS5	904	912	yes	yes	2	0.0040462	111.46	matching	matching	matching	MS/MS	matching	matching	matching	matching
KETEILSGSWTEQTYQEGTQATYK	DCKEPPPRKETEILSG	EGTQATYKCRPGYRTL	R	K	E	Y	K	C	1	0	0	0	0	3	4	2	0	1	1	2	0	0	0	2	5	1	2	0	0	24	1	2777.3	Q28085;CON__Q28085	Q28085	28	51	yes	no	3	1.6924e-102	158.89	matching	matching	matching	matching	matching	MS/MS	matching	matching
KGEEEHLGILGPQLHANVGDK	TFQVPVQRKGEEEHLG	LHANVGDKVNIIFKNM	R	K	G	D	K	V	1	0	1	1	0	1	3	4	2	1	3	2	0	0	1	0	0	0	0	1	0	21	1	2240.15	F1N076;CON__ENSEMBL:ENSBTAP00000031900	F1N076	794	814	no	no	3;4	1.751e-183	201.48	matching	MS/MS	MS/MS	MS/MS	MS/MS	MS/MS	MS/MS	MS/MS
KGSNFQLDQLQGR	YYAVAVVKKGSNFQLD	QLDQLQGRKSCHTGLG	K	K	G	G	R	K	0	1	1	1	0	3	0	2	0	0	2	1	0	1	0	1	0	0	0	0	0	13	1	1489.76	P24627	P24627	119	131	yes	yes	2;3	5.2595e-94	191.01	matching	MS/MS	MS/MS	matching	matching	matching	matching	MS/MS
KHPDASVNFSEFSK	TCREEHKKKHPDASVN	VNFSEFSKKCSERWKT	K	K	H	S	K	K	1	0	1	1	0	0	1	0	1	0	0	2	0	2	1	3	0	0	0	1	0	14	1	1591.76	P10103;E1BMK2	P10103	30	43	yes	no	3	1.5192e-05	131.35	matching	matching	matching	matching	matching	MS/MS	matching	matching
KHPDSSVNFAEFSK	TCREEHKKKHPDSSVN	VNFAEFSKKCSERWKT	K	K	H	S	K	K	1	0	1	1	0	0	1	0	1	0	0	2	0	2	1	3	0	0	0	1	0	14	1	1591.76	P40673;F1MF42	P40673	30	43	yes	no	2;3	0.00019662	106.76	matching	matching	matching	matching	matching	matching	matching	matching
KIEKFQSEEQQQTEDELQDK	ESITRINKKIEKFQSE	TEDELQDKIHPFAQTQ	K	K	I	D	K	I	0	0	0	2	0	5	5	0	0	1	1	3	0	1	0	1	1	0	0	0	0	20	2	2479.17	CON__P02666;P02666	CON__P02666	29	48	yes	no	2;3;4	0	221.81	matching	matching	matching	MS/MS	MS/MS	MS/MS	matching	matching
KIEQQLTLEK	QDEATGLKKIEQQLTL	EQQLTLEKLREWTRPE	K	K	I	E	K	L	0	0	0	0	0	2	2	0	0	1	2	2	0	0	0	0	1	0	0	0	0	10	1	1228.7	Q1JPB0	Q1JPB0	244	253	yes	yes	2;3	4.9632e-23	151.79	matching	matching	matching	matching	matching	matching	matching	matching
KIFTSDADFSGITNDHK	ILSQLGIKKIFTSDAD	SGITNDHKLAVSQVIH	K	K	I	H	K	L	1	0	1	3	0	0	0	1	1	2	0	2	0	2	0	2	2	0	0	0	0	17	1	1894.91	A0A0A0MPA0;CON__REFSEQ:XP_001252647	A0A0A0MPA0	331	347	no	no	3	1.396e-16	151.41	matching	matching	matching	matching	matching	MS/MS	matching	matching
KIQQSVSEFEDK	QKFEENLKKIQQSVSE	SVSEFEDKLADPVKIC	K	K	I	D	K	L	0	0	0	1	0	2	2	0	0	1	0	2	0	1	0	2	0	0	0	1	0	12	1	1436.71	G3MYH3;F1MGT1	G3MYH3	1503	1514	yes	no	2	0.0017374	120.06	matching	matching	MS/MS	MS/MS	matching	matching	MS/MS	matching
KIWDVVEK	KKNKLTQRKIWDVVEK	KIWDVVEKADIGCTPG	R	K	I	E	K	A	0	0	0	1	0	0	1	0	0	1	0	2	0	0	0	0	0	1	0	2	0	8	1	1015.57	Q2UVX4;CON__Q2UVX4;G3X7A5	Q2UVX4	613	620	yes	no	2	5.5472e-08	135.43	matching	matching	matching	matching	matching	matching	MS/MS	matching
KKNEPEDEEEEEEEEDEDEEEEDEDEE	PGRPTGSKKKNEPEDE	EEEDEDEE________	K	K	K	E	E	-	0	0	1	5	0	0	18	0	0	0	0	2	0	0	1	0	0	0	0	0	0	27	2	3383.2	P40673	P40673	183	209	yes	yes	3	1.0314e-36	115.42	matching	MS/MS	MS/MS	matching	matching	matching	matching	matching
KLDEAVAEAHLGK	VGVHFLPKKLDEAVAE	VAEAHLGKLNVKLTKL	K	K	L	G	K	L	3	0	0	1	0	0	2	1	1	0	2	2	0	0	0	0	0	0	0	1	0	13	1	1379.74	Q3MHL4	Q3MHL4	389	401	yes	yes	3	1.5576e-38	149.69	matching	matching	matching	matching	matching	matching	matching	matching
KLDVEASFLPK	IFEPQGIRKLDVEASF	VEASFLPKELAAQLIK	R	K	L	P	K	E	1	0	0	1	0	0	1	0	0	0	2	2	0	1	1	1	0	0	0	1	0	11	1	1245.7	Q0VCM5;F1MMP5;CON__Q0VCM5	Q0VCM5	199	209	yes	no	3	0.0023195	103.46	matching	matching	matching	matching	matching	matching	matching	matching
KLEDDFDEYIMVIENIIK	YKTRLIQKKLEDDFDE	MVIENIIKSGSDEVQV	K	K	L	I	K	S	0	0	1	3	0	0	3	0	0	4	1	2	1	1	0	0	0	0	1	1	0	18	1	2226.11	Q2UVX4;CON__Q2UVX4;G3X7A5	Q2UVX4	1551	1568	yes	no	2;3	0	269.34	MS/MS	MS/MS	MS/MS	MS/MS	MS/MS	MS/MS	MS/MS	MS/MS
KLEGDSTDLNDQIAELQAQIAELK	QELEKTRRKLEGDSTD	QAQIAELKMQLAKKEE	R	K	L	L	K	M	3	0	1	3	0	3	3	1	0	2	4	2	0	0	0	1	1	0	0	0	0	24	1	2641.34	F1MQ37	F1MQ37	1052	1075	yes	yes	3	3.0875e-64	151.3	matching	matching	matching	matching	MS/MS	MS/MS	matching	matching
KLLLSSLEEAK	IEQTNEERKLLLSSLE	LSSLEEAKKKKEDALN	R	K	L	A	K	K	1	0	0	0	0	0	2	0	0	0	4	2	0	0	0	2	0	0	0	0	0	11	1	1229.72	P17697;CON__P17697	P17697	62	72	yes	no	2;3	0.00039325	124.42	matching	matching	matching	matching	matching	MS/MS	matching	matching
KMINSWVESQTNGK	KNAAEESRKMINSWVE	VESQTNGKIKELFPED	R	K	M	G	K	I	0	0	2	0	0	1	1	1	0	1	0	2	1	0	0	2	1	1	0	1	0	14	1	1620.79	E1B8B5;A6QPZ4	A6QPZ4	93	106	no	no	2	0.021582	65.565	matching	matching	matching	matching	matching	matching	matching	matching
KMQTQFTDAQK	MFGDDDKRKMQTQFTD	TQFTDAQKHYQTLVIQ	R	K	M	Q	K	H	1	0	0	1	0	3	0	0	0	0	0	2	1	1	0	0	2	0	0	0	0	11	1	1324.64	E1BKT9	E1BKT9	617	627	yes	yes	2	0.051797	65.241	matching	matching	matching	matching	matching	matching	matching	matching
KNEAAINEIMEDLDTNVDK	PNFLKKQKKNEAAINE	DLDTNVDKQLSFEEFI	K	K	N	D	K	Q	2	0	3	3	0	0	3	0	0	2	1	2	1	0	0	0	1	0	0	1	0	19	1	2161.02	E1BLI9;F1MHS5;P28783	E1BLI9	54	72	no	no	2;3	6.7637e-182	196.01	matching	matching	matching	matching	matching	MS/MS	matching	matching
KNEGTYYSPSGSGPPPSGSHVAPK	PIGVRVDKKNEGTYYS	SGSHVAPKGTFTYEWT	K	K	N	P	K	G	1	0	1	0	0	0	1	4	1	0	0	2	0	0	5	5	1	0	2	1	0	24	1	2400.13	F1N076	F1N076	484	507	yes	yes	3	8.0156e-05	66.845	matching	matching	matching	matching	matching	matching	matching	matching
KNPDGSWEDWVMAAYQDR	KRLEPFKKKNPDGSWE	VMAAYQDRVSLSTTGF	K	K	N	D	R	V	2	1	1	3	0	1	1	1	0	0	0	1	1	0	1	1	0	2	1	1	0	18	1	2166.94	P80457;F1MUT3	P80457	1107	1124	yes	no	3	4.1127e-23	142.35	matching	matching	matching	matching	matching	matching	MS/MS	MS/MS
KNSLYQYDDITDQWMK	EHVFRTSRKNSLYQYD	DITDQWMKVYETPDRL	R	K	N	M	K	V	0	0	1	3	0	2	0	0	0	1	1	2	1	0	0	1	1	1	2	0	0	16	1	2046.94	F1N465	F1N465	555	570	yes	yes	2;3	0.0032991	80.96	matching	matching	matching	matching	MS/MS	MS/MS	matching	MS/MS
KNTMEHVSSSEESIISQETYK	________________	IISQETYKQEKNMAIN	-	K	N	Y	K	Q	0	0	1	0	0	1	4	0	1	2	0	2	1	0	0	5	2	0	1	1	0	21	1	2426.13	CON__P02663	CON__P02663	1	21	yes	yes	2;3;4	0	241.08	matching	MS/MS	MS/MS	MS/MS	MS/MS	MS/MS	MS/MS	MS/MS
KNTMEHVSSSEESIISQETYKQEK	________________	QETYKQEKNMAINPSK	-	K	N	E	K	N	0	0	1	0	0	2	5	0	1	2	0	3	1	0	0	5	2	0	1	1	0	24	2	2811.32	CON__P02663	CON__P02663	1	24	yes	yes	3;4	2.8756e-119	184.88	matching	matching	matching	MS/MS	MS/MS	matching	matching	matching
KNVATFYAQQGSLHEQK	KEAYRMGKKNVATFYA	QGSLHEQKMKEANHLA	K	K	N	Q	K	M	2	0	1	0	0	3	1	1	1	0	1	2	0	1	0	1	1	0	1	1	0	17	1	1947.98	E1BIJ5	E1BIJ5	1647	1663	yes	yes	2	0.024143	58.658	matching	matching	matching	matching	matching	matching	matching	matching
KPQEVNELYSPHR	SIHWQRPRKPQEVNEL	NELYSPHRAPSVDVEM	R	K	P	H	R	A	0	1	1	0	0	1	2	0	1	0	1	1	0	0	2	1	0	0	1	1	0	13	1	1595.81	F1MI18;F1MJK3	F1MI18	1189	1201	yes	no	3	0.039579	58.098	matching	matching	matching	matching	matching	matching	matching	matching
KQFQQMENSRQTVAR	QIDFSAARKQFQQMEN	NSRQTVARGQSTPRLF	R	K	Q	A	R	G	1	2	1	0	0	4	1	0	0	0	0	1	1	1	0	1	1	0	0	1	0	15	2	1849.92	F1N1T3	F1N1T3	324	338	yes	yes	2	0.035596	50.102	matching	matching	matching	matching	matching	matching	matching	matching
KQLETEEQAAFPLGGASPR	IQRLQVTRKQLETEEQ	PLGGASPRYLYLASKQ	R	K	Q	P	R	Y	3	1	0	0	0	2	3	2	0	0	2	1	0	1	2	1	1	0	0	0	0	19	1	2028.03	Q29437;Q9TTK6;E1BC10;E1BD43	Q29437	566	584	yes	no	3	9.5572e-05	103.88	matching	matching	matching	matching	matching	matching	matching	matching
KQPTAQGEVFLLK	IEGQSSFKKQPTAQGE	QGEVFLLKKQSTLQEN	K	K	Q	L	K	K	1	0	0	0	0	2	1	1	0	0	2	2	0	1	1	0	1	0	0	1	0	13	1	1457.82	G3N0U2	G3N0U2	722	734	yes	yes	2	0.030198	61.11	matching	matching	matching	matching	matching	matching	matching	matching
KQSEENNNLQNQVQK	________________	NLQNQVQKLTEENTTL	M	K	Q	Q	K	L	0	0	4	0	0	4	2	0	0	0	1	2	0	0	0	1	0	0	0	1	0	15	1	1799.88	F1MTJ4	F1MTJ4	2	16	yes	yes	3	0.0029412	98.942	matching	matching	matching	matching	matching	matching	matching	matching
KQTALVELLK	PDTEKQIKKQTALVEL	TALVELLKHKPKATEE	K	K	Q	L	K	H	1	0	0	0	0	1	1	0	0	0	3	2	0	0	0	0	1	0	0	1	0	10	1	1141.71	P02769;CON__P02769	P02769	548	557	yes	no	2	1.8974e-88	187.31	matching	MS/MS	MS/MS	MS/MS	MS/MS	MS/MS	MS/MS	matching
KQVLSNENTQLNSNNGYLSTVTIK	TVHDFPAKKQVLSNEN	YLSTVTIKIPASKELK	K	K	Q	I	K	I	0	0	5	0	0	2	1	1	0	1	3	2	0	0	0	3	3	0	1	2	0	24	1	2664.37	Q2UVX4;CON__Q2UVX4;G3X7A5	Q2UVX4	66	89	yes	no	3	2.5648e-24	127.35	matching	matching	matching	matching	matching	matching	matching	matching
KRFHLLSR	QEANTEPRKRFHLLSR	KRFHLLSRLRKAVKHA	R	K	R	S	R	L	0	2	0	0	0	0	0	0	1	0	2	1	0	1	0	1	0	0	0	0	0	8	2	1055.64	A6QQW3	A6QQW3	148	155	yes	yes	2	0.032893	65.246	matching	matching	matching	matching	matching	matching	matching	matching
KSSKLIMELTGGGQESSGLNLGK	TPAPNKKRKSSKLIME	SSGLNLGKKISVPRDV	R	K	S	G	K	K	0	0	1	0	0	1	2	5	0	1	4	3	1	0	0	4	1	0	0	0	0	23	2	2333.23	E1BHK1;Q8SQ24;E1BDJ9	E1BHK1	14	36	yes	no	2	0.00023972	69.081	matching	matching	matching	matching	matching	matching	matching	matching
KTDPAEEDTNVYTEK	VHLPDSERKTDPAEED	DTNVYTEKHSDNLFKR	R	K	T	E	K	H	1	0	1	2	0	0	3	0	0	0	0	2	0	0	1	0	3	0	1	1	0	15	1	1738.79	Q58DD4	Q58DD4	121	135	yes	yes	3	3.7268e-07	145.7	matching	matching	matching	matching	matching	matching	MS/MS	matching
KTEQFQVSVSVAPAAK	GLVRATGRKTEQFQVS	VSVAPAAKVTFELVYE	R	K	T	A	K	V	3	0	0	0	0	2	1	0	0	0	0	2	0	1	1	2	1	0	0	3	0	16	1	1688.91	F1MMD7;Q3T052;CON__Q3T052	F1MMD7	125	140	yes	no	2;3	2.0112e-253	210.91	matching	MS/MS	matching	MS/MS	MS/MS	MS/MS	matching	MS/MS
KTLLGDGPVVADPTAPNVTVTR	DESLTKYKKTLLGDGP	APNVTVTRLTLVCESA	K	K	T	T	R	L	2	1	1	2	0	0	0	2	0	0	2	1	0	0	3	0	4	0	0	4	0	22	1	2220.21	Q9TU03	Q9TU03	49	70	yes	yes	3	0.00024448	80.752	matching	matching	matching	matching	matching	matching	matching	matching
KTQIPEVFLTK	QYIFELSRKTQIPEVF	IPEVFLTKILESTLKS	R	K	T	T	K	I	0	0	0	0	0	1	1	0	0	1	1	2	0	1	1	0	2	0	0	1	0	11	1	1302.75	Q3MHN5;CON__Q3MHN5	Q3MHN5	352	362	yes	no	3	0.001954	114.71	matching	matching	matching	matching	matching	matching	matching	matching
KTVDMESTEVFTK	STSEENSKKTVDMEST	ESTEVFTKKTKLTEEE	K	K	T	T	K	K	0	0	0	1	0	0	2	0	0	0	0	2	1	1	0	1	3	0	0	2	0	13	1	1513.73	CON__P02663;P02663	CON__P02663	137	149	yes	no	2;3	6.5381e-08	138.19	matching	matching	MS/MS	MS/MS	MS/MS	MS/MS	matching	MS/MS
KTYDSYLGDDYVR	KCLASIAKKTYDSYLG	YLGDDYVRAMTNLRQC	K	K	T	V	R	A	0	1	0	3	0	0	0	1	0	0	1	1	0	0	0	1	1	0	3	1	0	13	1	1593.73	G3X6N3;CON__Q0IIK2;CON__Q29443;Q29443	G3X6N3	670	682	yes	no	2;3	1.9767e-14	164.7	matching	matching	matching	matching	matching	MS/MS	matching	matching
KVEAQLQELQVK	ADTEHKRKKVEAQLQE	QLQELQVKFTEGERVR	K	K	V	V	K	F	1	0	0	0	0	3	2	0	0	0	2	2	0	0	0	0	0	0	0	2	0	12	1	1411.8	F1MQ37	F1MQ37	1249	1260	yes	yes	3	0.0025694	98.182	matching	matching	matching	matching	matching	matching	matching	matching
KVESLQEEIAFLK	LARLDLERKVESLQEE	QEEIAFLKKLHDEEIQ	R	K	V	L	K	K	1	0	0	0	0	1	3	0	0	1	2	2	0	1	0	1	0	0	0	1	0	13	1	1532.85	P48616	P48616	223	235	yes	yes	2;3	1.1902e-13	146.59	matching	matching	matching	matching	matching	MS/MS	matching	matching
KVPQVSTPTLVEVSR	ALIVRYTRKVPQVSTP	PTLVEVSRSLGKVGTR	R	K	V	S	R	S	0	1	0	0	0	1	1	0	0	0	1	1	0	0	2	2	2	0	0	4	0	15	1	1638.93	P02769;CON__P02769;CON__P02768-1	P02769	437	451	no	no	2;3	1.7098e-88	174.24	MS/MS	MS/MS	MS/MS	MS/MS	MS/MS	MS/MS	MS/MS	MS/MS
KVSPVIIDNTNLQAWEMK	RAKEAFEKKVSPVIID	NLQAWEMKPYVALSQK	K	K	V	M	K	P	1	0	2	1	0	1	1	0	0	2	1	2	1	0	1	1	1	1	0	2	0	18	1	2085.09	E1BIJ5	E1BIJ5	505	522	yes	yes	3	0.013189	60.246	MS/MS	matching	matching	matching	matching	matching	matching	matching
KWEAEAVYVQR	PAAQNTKRKWEAEAVY	AEAVYVQRAKAYLEEE	R	K	W	Q	R	A	2	1	0	0	0	1	2	0	0	0	0	1	0	0	0	0	0	1	1	2	0	11	1	1377.7	Q3ZCH5	Q3ZCH5	164	174	yes	yes	2;3	0.0029042	129.34	matching	matching	matching	matching	matching	matching	MS/MS	MS/MS
KWHEEVEIYR	PYLDEFQKKWHEEVEI	HEEVEIYRQKVAPLGE	K	K	W	Y	R	Q	0	1	0	0	0	0	3	0	1	1	0	1	0	0	0	0	0	1	1	1	0	10	1	1387.69	P15497;CON__P15497	P15497	130	139	yes	no	2;3	1.5656e-06	150.1	matching	matching	MS/MS	matching	matching	MS/MS	MS/MS	matching
KYPVASFTDR	KVPMMNSKKYPVASFT	PVASFTDRTLNRPGGR	K	K	Y	D	R	T	1	1	0	1	0	0	0	0	0	0	0	1	0	1	1	1	1	0	1	1	0	10	1	1182.6	P50448;CON__P50448;E1BMJ0	P50448	303	312	no	no	2	0.034322	94.767	matching	matching	matching	matching	matching	matching	matching	matching
KYTLPPGVDPTLVSSSLSPEGTLTVEAPLPK	YISRCFTRKYTLPPGV	TVEAPLPKSATQSAEI	R	K	Y	P	K	S	1	0	0	1	0	0	2	2	0	0	5	2	0	0	6	4	4	0	1	3	0	31	1	3192.72	Q3T149;E1BEL7	Q3T149	137	167	yes	no	3	0.00017077	50.802	matching	matching	matching	matching	matching	MS/MS	matching	matching
LAAAVSNFGYDLYR	FFKVPVNKLAAAVSNF	NFGYDLYRVRSGESPT	K	L	A	Y	R	V	3	1	1	1	0	0	0	1	0	0	2	0	0	1	0	1	0	0	2	1	0	14	0	1558.78	Q95121;CON__Q95121	Q95121	52	65	yes	no	2	5.5189e-135	188.63	matching	MS/MS	matching	matching	matching	matching	matching	matching
LAEGFPLPLLR	FYPKVNDKLAEGFPLP	GFPLPLLRKIQLYDPI	K	L	A	L	R	K	1	1	0	0	0	0	1	1	0	0	4	0	0	1	2	0	0	0	0	0	0	11	0	1224.72	Q2TBI0;F1MNN7	Q2TBI0	444	454	yes	no	2	6.606e-29	158.47	matching	MS/MS	MS/MS	MS/MS	MS/MS	matching	matching	MS/MS
LAGAPSEDPQFPK	SHNKVNARLAGAPSED	SEDPQFPKVQWPPREL	R	L	A	P	K	V	2	0	0	1	0	1	1	1	0	0	1	1	0	1	3	1	0	0	0	0	0	13	0	1355.67	F1MM32	F1MM32	489	501	yes	yes	2	5.8452e-37	174.21	matching	MS/MS	matching	MS/MS	MS/MS	MS/MS	matching	MS/MS
LAGLEETYSNR	NVNVNTARLAGLEETY	LEETYSNRLYRYNHDF	R	L	A	N	R	L	1	1	1	0	0	0	2	1	0	0	2	0	0	0	0	1	1	0	1	0	0	11	0	1251.61	Q3ZCJ8;F1N455	Q3ZCJ8	156	166	yes	no	2	3.8814e-147	197.73	matching	MS/MS	matching	MS/MS	MS/MS	matching	matching	matching
LAIGEGQQHQLGGAK	MKIIPLNRLAIGEGQQ	QHQLGGAKQAGDV___	R	L	A	A	K	Q	2	0	0	0	0	3	1	4	1	1	2	1	0	0	0	0	0	0	0	0	0	15	0	1505.8	Q3SZZ9;F1MGU7;P12799	Q3SZZ9	416	430	yes	no	2;3	4.5359e-72	176.56	matching	MS/MS	matching	MS/MS	MS/MS	MS/MS	MS/MS	MS/MS
LAILGIHNEVSK	LPDADKERLAILGIHN	GIHNEVSKIVQTYHVN	R	L	A	S	K	I	1	0	1	0	0	0	1	1	1	2	2	1	0	0	0	1	0	0	0	1	0	12	0	1292.75	Q3B7N2	Q3B7N2	566	577	yes	yes	2;3	0.033183	71.558	matching	matching	matching	matching	matching	matching	matching	matching
LALRRSLTR	________________	ALRRSLTRALAAPTMA	M	L	A	T	R	A	1	3	0	0	0	0	0	0	0	0	3	0	0	0	0	1	1	0	0	0	0	9	2	1084.68	G3X6L8	G3X6L8	2	10	yes	yes	2	0.020194	57.047	matching	matching	matching	matching	matching	matching	matching	matching
LAMQEFMILPVGAENFR	GGSHAGNKLAMQEFMI	PVGAENFREAMRIGAE	K	L	A	F	R	E	2	1	1	0	0	1	2	1	0	1	2	0	2	2	1	0	0	0	0	1	0	17	0	1964.99	Q9XSJ4;F1MB08	Q9XSJ4	163	179	yes	no	2;3	0.00038727	119.37	matching	matching	matching	matching	matching	MS/MS	matching	matching
LANSRCTMEVAREK	________________	TMEVAREKLRKYVFDR	R	L	A	E	K	L	2	2	1	0	1	0	2	0	0	0	1	1	1	0	0	1	1	0	0	1	0	14	2	1663.81	Q58DJ3;F1N6M5	Q58DJ3	3	16	yes	no	2	0.0063423	88.163	MS/MS	matching	matching	matching	matching	matching	matching	matching
LAQAAQSSVATITR	NAAGSQEKLAQAAQSS	SSVATITRLADVVKLG	K	L	A	T	R	L	4	1	0	0	0	2	0	0	0	1	1	0	0	0	0	2	2	0	0	1	0	14	0	1415.77	F1MDH3	F1MDH3	2053	2066	yes	yes	2	0.0013402	119	matching	matching	matching	matching	matching	MS/MS	matching	matching
LAQSNGWGVMVSHR	TESLQACKLAQSNGWG	WGVMVSHRSGETEDTF	K	L	A	H	R	S	1	1	1	0	0	1	0	2	1	0	1	0	1	0	0	2	0	1	0	2	0	14	0	1540.76	Q9XSJ4;F1MB08;Q3ZC09	Q9XSJ4	359	372	yes	no	3	0.040935	51.009	matching	matching	matching	matching	matching	matching	matching	matching
LASDLLEWIR	HLMEDYERLASDLLEW	SDLLEWIRRTIPWLED	R	L	A	I	R	R	1	1	0	1	0	0	1	0	0	1	3	0	0	0	0	1	0	1	0	0	0	10	0	1214.67	Q3B7N2;A5D7D1	A5D7D1	301	310	no	no	2	6.1379e-06	152.04	matching	matching	matching	matching	matching	matching	matching	matching
LASLLSPR	ASAGSTPRLASLLSPR	LASLLSPRPLPAMARN	R	L	A	P	R	P	1	1	0	0	0	0	0	0	0	0	3	0	0	0	1	2	0	0	0	0	0	8	0	855.518	E1BAU6	E1BAU6	197	204	yes	yes	2	0.00040287	116.25	MS/MS	MS/MS	MS/MS	MS/MS	MS/MS	MS/MS	MS/MS	MS/MS
LASVAAGAFR	YLFLNDNRLASVAAGA	SVAAGAFRGLQKLDML	R	L	A	F	R	G	4	1	0	0	0	0	0	1	0	0	1	0	0	1	0	1	0	0	0	1	0	10	0	961.535	Q2KIF2;CON__Q2KIF2	Q2KIF2	247	256	yes	no	2	4.6811e-50	171.33	matching	matching	matching	MS/MS	MS/MS	MS/MS	MS/MS	matching
LAVYQAGASEGAER	DADDLKKRLAVYQAGA	GASEGAERSLSAIRER	R	L	A	E	R	S	4	1	0	0	0	1	2	2	0	0	1	0	0	0	0	1	0	0	1	1	0	14	0	1420.69	Q03247;CON__Q03247	Q03247	176	189	yes	no	2	1.0099e-210	212.03	MS/MS	MS/MS	MS/MS	matching	matching	MS/MS	matching	MS/MS
LAYEISLQEAGAVYGGNTPAAMLTR	DVRFQGERLAYEISLQ	TPAAMLTRYMDSGFGM	R	L	A	T	R	Y	5	1	1	0	0	1	2	3	0	1	3	0	1	0	1	1	2	0	2	1	0	25	0	2595.3	Q29437	Q29437	358	382	yes	yes	2;3	8.0935e-23	117.96	matching	matching	matching	matching	matching	MS/MS	matching	matching
LCQAKRLVLTHFSQR	QMAATFAKLCQAKRLV	VLTHFSQRYKPVALAR	K	L	C	Q	R	Y	1	2	0	0	1	2	0	0	1	0	3	1	0	1	0	1	1	0	0	1	0	15	2	1856.02	Q29RY4	Q29RY4	303	317	yes	yes	3	0.00068944	102.97	matching	matching	matching	matching	matching	matching	matching	MS/MS
LDENYQPWGPEAELPLHTLFFNTWR	EVPSTVSRLDENYQPW	TLFFNTWRIIKDGGID	R	L	D	W	R	I	1	1	2	1	0	1	3	1	1	0	4	0	0	2	3	0	2	2	1	0	0	25	0	3072.48	P80025;G3MXZ0	P80025	478	502	yes	no	3	1.0971e-18	102.27	matching	matching	MS/MS	matching	matching	MS/MS	matching	MS/MS
LDGLNLIDIWK	DEKARGTRLDGLNLID	LNLIDIWKSFKPKHKH	R	L	D	W	K	S	0	0	1	2	0	0	0	1	0	2	3	1	0	0	0	0	0	1	0	0	0	11	0	1298.72	P09487	P09487	247	257	yes	yes	2	3.0526e-108	186.58	matching	matching	matching	matching	matching	MS/MS	matching	matching
LDGSFDVK	KVRKRILRLDGSFDVK	LDGSFDVKVKGITISV	R	L	D	V	K	V	0	0	0	2	0	0	0	1	0	0	1	1	0	1	0	1	0	0	0	1	0	8	0	879.434	Q2TBI0;F1MNN7	Q2TBI0	125	132	yes	no	2	0.023985	70.816	matching	matching	matching	matching	matching	MS/MS	matching	matching
LDGSLDFK	GWTVFQKRLDGSLDFK	LDGSLDFKKNWIQYKE	R	L	D	F	K	K	0	0	0	2	0	0	0	1	0	0	2	1	0	1	0	1	0	0	0	0	0	8	0	893.449	Q3SZZ9;F1MGU7;P12799	Q3SZZ9	222	229	yes	no	2	3.5783e-13	137.13	matching	MS/MS	matching	matching	matching	MS/MS	matching	MS/MS
LDIDSPPITAR	TFLEHMCRLDIDSPPI	DSPPITARNTGIICTI	R	L	D	A	R	N	1	1	0	2	0	0	0	0	0	2	1	0	0	0	2	1	1	0	0	0	0	11	0	1196.64	A5D984	A5D984	33	43	yes	yes	2	2.0228e-16	145.23	matching	matching	matching	matching	matching	MS/MS	matching	matching
LDINTNTYTSQDLK	KGLKKGKRLDINTNTY	TYTSQDLKNALAKFKE	R	L	D	L	K	N	0	0	2	2	0	1	0	0	0	1	2	1	0	0	0	1	3	0	1	0	0	14	0	1624.79	Q32KV6	Q32KV6	120	133	yes	yes	2	1.6818e-157	214.65	matching	matching	matching	matching	matching	matching	MS/MS	matching
LDLNLGAQATWTELPWLHTK	MAGQKLWRLDLNLGAQ	ELPWLHTKVDGALCTE	R	L	D	T	K	V	2	0	1	1	0	1	1	1	1	0	5	1	0	0	1	0	3	2	0	0	0	20	0	2306.21	Q3SZV7;CON__Q3SZV7	Q3SZV7	376	395	yes	no	2;3	1.1856e-64	175.77	matching	matching	matching	matching	matching	MS/MS	matching	matching
LDLSPWASR	VDCSTVDKLDLSPWAS	DLSPWASREN______	K	L	D	S	R	E	1	1	0	1	0	0	0	0	0	0	2	0	0	0	1	2	0	1	0	0	0	9	0	1043.54	P80025;G3MXZ0	P80025	702	710	yes	no	2	2.5388e-05	123.86	matching	matching	MS/MS	matching	matching	MS/MS	MS/MS	MS/MS
LDMLDLSNNLLTTVPTGLWTSLGK	GAFRGLQKLDMLDLSN	GLWTSLGKAARNLKDG	K	L	D	G	K	A	0	0	2	2	0	0	0	2	0	0	7	1	1	0	1	2	4	1	0	1	0	24	0	2601.37	Q2KIF2;CON__Q2KIF2	Q2KIF2	261	284	yes	no	2;3	8.5006e-30	123.6	matching	matching	matching	matching	matching	MS/MS	matching	matching
LDNLVAILDINR	MAFASIYKLDNLVAIL	VAILDINRLGQSDPAP	K	L	D	N	R	L	1	1	2	2	0	0	0	0	0	2	3	0	0	0	0	0	0	0	0	1	0	12	0	1367.78	A7E3W4;A7Z014;Q6B855	A7E3W4	148	159	yes	no	2	1.3693e-75	170.79	matching	matching	matching	matching	MS/MS	matching	matching	matching
LDNQEPGGQIAPK	LPPLSLLKLDNQEPGG	PGGQIAPKKAPEDCKL	K	L	D	P	K	K	1	0	1	1	0	2	1	2	0	1	1	1	0	0	2	0	0	0	0	0	0	13	0	1365.69	P28800;CON__P28800	P28800	53	65	yes	no	2	4.8031e-37	171.62	matching	matching	matching	MS/MS	MS/MS	MS/MS	MS/MS	matching
LDPTYTSATLLFQK	DSKDKCGKLDPTYTSA	SATLLFQKDPPANIQL	K	L	D	Q	K	D	1	0	0	1	0	1	0	0	0	0	3	1	0	1	1	1	3	0	1	0	0	14	0	1596.84	P80457;F1MUT3	P80457	538	551	yes	no	2;3	1.2263e-239	219.97	MS/MS	MS/MS	matching	matching	matching	matching	MS/MS	MS/MS
LDQQVEDFR	SLAELSSRLDQQVEDF	DQQVEDFRRTVGPYGE	R	L	D	F	R	R	0	1	0	2	0	2	1	0	0	0	1	0	0	1	0	0	0	0	0	1	0	9	0	1148.55	Q32PJ2;F1N3Q7;CON__Q32PJ2	Q32PJ2	296	304	yes	no	2	4.3562e-94	198.62	matching	matching	matching	matching	MS/MS	MS/MS	matching	matching
LDQQVEDFRR	SLAELSSRLDQQVEDF	QQVEDFRRTVGPYGET	R	L	D	R	R	T	0	2	0	2	0	2	1	0	0	0	1	0	0	1	0	0	0	0	0	1	0	10	1	1304.65	Q32PJ2;F1N3Q7;CON__Q32PJ2	Q32PJ2	296	305	yes	no	3	0.0034109	98.044	matching	matching	MS/MS	matching	matching	MS/MS	matching	matching
LDQWLCEK	HKALCSEKLDQWLCEK	LDQWLCEKL_______	K	L	D	E	K	L	0	0	0	1	1	1	1	0	0	0	2	1	0	0	0	0	0	1	0	0	0	8	0	1090.51	CON__P00711;P00711	CON__P00711	115	122	yes	no	2	0.0663	79.986	matching	matching	matching	matching	matching	matching	matching	matching
LDSFQDTGMDHHALLK	LRMLIKAKLDSFQDTG	MDHHALLKQFDHLNHL	K	L	D	L	K	Q	1	0	0	3	0	1	0	1	2	0	3	1	1	1	0	1	1	0	0	0	0	16	0	1826.86	Q0IIH5	Q0IIH5	122	137	yes	yes	3	0.015385	62.528	matching	matching	matching	matching	matching	matching	MS/MS	matching
LDTAYDDFGNSGHFTIIYNQGFEIVLNDYK	KVVVHLKKLDTAYDDF	EIVLNDYKWFAFFKYK	K	L	D	Y	K	W	1	0	3	4	0	1	1	3	1	3	2	1	0	3	0	1	2	0	3	1	0	30	0	3468.61	Q3ZCJ8;F1N455	Q3ZCJ8	71	100	yes	no	3	5.3863e-19	72.913	matching	matching	matching	matching	MS/MS	MS/MS	matching	matching
LDTTETEKGPIQSMFFGYLLYGNYPG	DRVWLESKLDTTETEK	LLYGNYPG________	K	L	D	P	G	-	0	0	1	1	0	1	2	4	0	1	3	1	1	2	2	1	3	0	3	0	0	26	1	2940.39	Q2KIU3;CON__Q2KIU3	Q2KIU3	190	215	yes	no	3	5.2608e-07	76.049	matching	matching	matching	matching	matching	MS/MS	matching	matching
LDYQESPPGK	YSATRELKLDYQESPP	YQESPPGKEISCWSVE	K	L	D	G	K	E	0	0	0	1	0	1	1	1	0	0	1	1	0	0	2	1	0	0	1	0	0	10	0	1132.54	F1MMD7;Q3T052;CON__Q3T052	F1MMD7	898	907	yes	no	2	1.1143e-154	201.09	matching	MS/MS	MS/MS	MS/MS	MS/MS	MS/MS	matching	matching
LEAALR	KFYEFSQRLEAALRGL	QRLEAALRGLLGALTS	R	L	E	L	R	G	2	1	0	0	0	0	1	0	0	0	2	0	0	0	0	0	0	0	0	0	0	6	0	671.397	Q2KJI3;F1MPT5	Q2KJI3	100	105	no	no	1	0.0039324	63.671	matching	matching	matching	matching	matching	matching	matching	matching
LEAVNITDLNQNR	SGDEIKLKLEAVNITD	ITDLNQNREQDKRFAF	K	L	E	N	R	E	1	1	3	1	0	1	1	0	0	1	2	0	0	0	0	0	1	0	0	1	0	13	0	1498.77	O77482	O77482	103	115	yes	yes	2	6.1464e-05	134.88	matching	matching	matching	matching	matching	matching	matching	matching
LEDAGALRPQEEAGR	DAGRRLARLEDAGALR	RPQEEAGRALGAVLEE	R	L	E	G	R	A	3	2	0	1	0	1	3	2	0	0	2	0	0	0	1	0	0	0	0	0	0	15	1	1610.8	Q0VCG9;G3X6Q8	Q0VCG9	134	148	yes	no	2;3	0.0012597	93.348	matching	matching	matching	matching	MS/MS	MS/MS	matching	matching
LEDDFDEYIMVIENIIK	KTRLIQKKLEDDFDEY	MVIENIIKSGSDEVQV	K	L	E	I	K	S	0	0	1	3	0	0	3	0	0	4	1	1	1	1	0	0	0	0	1	1	0	17	0	2098.02	Q2UVX4;CON__Q2UVX4;G3X7A5	Q2UVX4	1552	1568	yes	no	2;3	0	260.56	matching	MS/MS	MS/MS	MS/MS	MS/MS	MS/MS	MS/MS	MS/MS
LEDHLEGIINIFHQYSVR	________________	IFHQYSVRVGHFDTLN	K	L	E	V	R	V	0	1	1	1	0	1	2	1	2	3	2	0	0	1	0	1	0	0	1	1	0	18	0	2182.12	P79105;G3N2H5	P79105	4	21	yes	no	4	5.8936e-05	115.04	matching	matching	matching	matching	matching	matching	matching	matching
LEDLLQDAQDEKDQLNEYR	DRSITVTRLEDLLQDA	KDQLNEYRGHLSGLAK	R	L	E	Y	R	G	1	1	1	4	0	3	3	0	0	0	4	1	0	0	0	0	0	0	1	0	0	19	1	2334.1	E1BF59	E1BF59	887	905	yes	yes	3	0.00063981	85.576	matching	matching	matching	matching	MS/MS	MS/MS	matching	matching
LEEELQFSLGSK	LTNHQVHRLEEELQFS	LQFSLGSKINVEVRGN	R	L	E	S	K	I	0	0	0	0	0	1	3	1	0	0	3	1	0	1	0	2	0	0	0	0	0	12	0	1378.7	E1BH06;CON__P01030;P01030;F1MP09;CON__ENSEMBL:ENSBTAP00000007350;F1MVK1	CON__ENSEMBL:ENSBTAP00000007350	1352	1363	no	no	2	5.9482e-88	179.5	matching	matching	matching	matching	matching	matching	matching	matching
LEEITGFFAR	CPPLEPARLEEITGFF	EITGFFARNNEEYLAL	R	L	E	A	R	N	1	1	0	0	0	0	2	1	0	1	1	0	0	2	0	0	1	0	0	0	0	10	0	1181.61	F1MM32	F1MM32	174	183	yes	yes	2	7.2795e-45	164.66	matching	MS/MS	matching	MS/MS	MS/MS	MS/MS	matching	matching
LEESYDLQEPLAR	RVQLPRFKLEESYDLQ	DLQEPLARLGVRDLFS	K	L	E	A	R	L	1	1	0	1	0	1	3	0	0	0	3	0	0	0	1	1	0	0	1	0	0	13	0	1561.76	Q1JPB0	Q1JPB0	277	289	yes	yes	2	2.5631e-234	214.61	matching	matching	matching	matching	matching	matching	matching	matching
LEETDDPDPDDYGGR	VNPQFKIRLEETDDPD	DPDDYGGRESGCSFLL	R	L	E	G	R	E	0	1	0	5	0	0	2	2	0	0	1	0	0	0	2	0	1	0	1	0	0	15	0	1692.68	Q27970	Q27970	401	415	yes	yes	2	0.002394	98.676	matching	matching	matching	matching	matching	MS/MS	matching	matching
LEGDSTDLNDQIAELQAQIAELK	ELEKTRRKLEGDSTDL	QAQIAELKMQLAKKEE	K	L	E	L	K	M	3	0	1	3	0	3	3	1	0	2	4	1	0	0	0	1	1	0	0	0	0	23	0	2513.25	F1MQ37	F1MQ37	1053	1075	yes	yes	3	0.00016813	67.76	matching	matching	matching	matching	matching	matching	matching	matching
LEGEDQFLEVAEAPEATQATFPVHR	RGVTFLLRLEGEDQFL	QATFPVHRAGNYSCSY	R	L	E	H	R	A	4	1	0	1	0	2	5	1	1	0	2	0	0	2	2	0	2	0	0	2	0	25	0	2783.34	Q2KJF1;CON__Q2KJF1	Q2KJF1	155	179	yes	no	2;3;4	1.9995e-46	144.43	matching	MS/MS	MS/MS	MS/MS	MS/MS	MS/MS	matching	MS/MS
LEGFSVPR	DLTHFNQRLEGFSVPR	LEGFSVPRCWDECLKS	R	L	E	P	R	C	0	1	0	0	0	0	1	1	0	0	1	0	0	1	1	1	0	0	0	1	0	8	0	903.481	P80457;F1MUT3	P80457	959	966	yes	no	2	2.3252e-13	156.75	matching	matching	matching	matching	matching	matching	MS/MS	MS/MS
LEIEEIEK	TEGEETHRLEIEEIEK	LEIEEIEKSEKDEKEF	R	L	E	E	K	S	0	0	0	0	0	0	4	0	0	2	1	1	0	0	0	0	0	0	0	0	0	8	0	1001.53	F1N757	F1N757	9534	9541	yes	yes	2	0.012919	89.142	matching	matching	matching	MS/MS	matching	matching	matching	matching
LELVHQGPMAVAFEVYDDFLHYR	GCNEALMKLELVHQGP	YDDFLHYRKGVYHHTG	K	L	E	Y	R	K	2	1	0	2	0	1	2	1	2	0	3	0	1	2	1	0	0	0	2	3	0	23	0	2748.34	Q3ZCJ8;F1N455	Q3ZCJ8	362	384	yes	no	3;4	1.4515e-33	142.27	matching	matching	matching	matching	MS/MS	MS/MS	matching	matching
LEMIAMENPADLK	IIDDALVRLEMIAMEN	MENPADLKKQLYVEFE	R	L	E	L	K	K	2	0	1	1	0	0	2	0	0	1	2	1	2	0	1	0	0	0	0	0	0	13	0	1473.72	A4IFN7	A4IFN7	540	552	yes	yes	3	0.042126	57.52	matching	matching	matching	matching	matching	matching	matching	matching
LENEIQTYR	QLLDIKIRLENEIQTY	ENEIQTYRSLLEGEGS	R	L	E	Y	R	S	0	1	1	0	0	1	2	0	0	1	1	0	0	0	0	0	1	0	1	0	0	9	0	1164.58	CON__P13645;P06394;A6QNZ7	CON__P13645	442	450	no	no	2	5.5384e-05	123.96	matching	matching	matching	matching	matching	matching	MS/MS	matching
LENTCSECQFKKQEINNEIDK	NNFDLTIRLENTCSEC	EINNEIDKEYSNCNSI	R	L	E	D	K	E	0	0	3	1	2	2	4	0	0	2	1	3	0	1	0	1	1	0	0	0	0	21	2	2626.2	F1MD00	F1MD00	624	644	yes	yes	3	5.658e-05	94.61	matching	matching	MS/MS	matching	matching	matching	matching	matching
LEQYTQAVEIAGR	PISKIDERLEQYTQAV	QAVEIAGRTPKLTRQP	R	L	E	G	R	T	2	1	0	0	0	2	2	1	0	1	1	0	0	0	0	0	1	0	1	1	0	13	0	1476.76	Q0P5E0	Q0P5E0	255	267	yes	yes	2	6.6082e-78	171.11	matching	matching	matching	matching	matching	matching	matching	matching
LETPYFR	KVPMMTLRLETPYFRD	RLETPYFRDEELGCTL	R	L	E	F	R	D	0	1	0	0	0	0	1	0	0	0	1	0	0	1	1	0	1	0	1	0	0	7	0	924.471	A0A0A0MPA0	A0A0A0MPA0	245	251	yes	yes	2	6.4719e-14	133.81	matching	matching	matching	matching	matching	MS/MS	matching	MS/MS
LEVDIDIK	DQLVDMKRLEVDIDIK	LEVDIDIKIRSCKGSC	R	L	E	I	K	I	0	0	0	2	0	0	1	0	0	2	1	1	0	0	0	0	0	0	0	1	0	8	0	943.523	P02672;CON__P02672;A5PJE3	P02672	172	179	yes	no	2	0.0091567	95.502	matching	MS/MS	matching	matching	MS/MS	matching	matching	matching
LEVEANNAFDQYR	MPSARLRKLEVEANNA	NNAFDQYRDLYFEGGV	K	L	E	Y	R	D	2	1	2	1	0	1	2	0	0	0	1	0	0	1	0	0	0	0	1	1	0	13	0	1567.73	P79136	P79136	125	137	yes	yes	2	5.4072e-180	201.08	matching	matching	matching	matching	matching	MS/MS	matching	matching
LEYHQVVQQMEQK	HDQLEAQKLEYHQVVQ	VVQQMEQKKLQQISPS	K	L	E	Q	K	K	0	0	0	0	0	4	2	0	1	0	1	1	1	0	0	0	0	0	1	2	0	13	0	1658.81	Q0IIH5	Q0IIH5	387	399	yes	yes	2;3	2.9787e-62	183	MS/MS	matching	matching	matching	matching	MS/MS	MS/MS	matching
LEYVGGISMLVVVPHK	ELDCDVLRLEYVGGIS	MLVVVPHKLSGMKTLE	R	L	E	H	K	L	0	0	0	0	0	0	1	2	1	1	2	1	1	0	1	1	0	0	1	4	0	16	0	1739.96	CON__ENSEMBL:ENSBTAP00000018574;A6QPP2	CON__ENSEMBL:ENSBTAP00000018574	344	359	yes	no	3	0.016488	65.219	matching	matching	matching	matching	matching	matching	matching	matching
LFDMSAFMAGPGNAK	LVPVVNNRLFDMSAFM	MAGPGNAKKVVENGAL	R	L	F	A	K	K	3	0	1	1	0	0	0	2	0	0	1	1	2	2	1	1	0	0	0	0	0	15	0	1555.72	O18738;F1N7D7	O18738	235	249	yes	no	2	0.0091335	109.99	matching	matching	matching	matching	matching	matching	matching	matching
LFDQAFGLPR	DWYPAHSRLFDQAFGL	DQAFGLPRLPEEWSQW	R	L	F	P	R	L	1	1	0	1	0	1	0	1	0	0	2	0	0	2	1	0	0	0	0	0	0	10	0	1162.61	Q3T149;E1BEL7;G3X7S2	Q3T149	29	38	yes	no	2	0.0040394	102.53	matching	matching	matching	matching	matching	matching	matching	matching
LFENNYNPQEK	QQRLGISRLFENNYNP	NNYNPQEKLNDVLLLQ	R	L	F	E	K	L	0	0	3	0	0	1	2	0	0	0	1	1	0	1	1	0	0	0	1	0	0	11	0	1394.65	G3MXK8	G3MXK8	96	106	yes	yes	2	1.5008e-221	210.44	matching	matching	MS/MS	MS/MS	MS/MS	MS/MS	matching	matching
LFEVAANKNNFLQPQNDPR	AKLNSDIKLFEVAANK	LQPQNDPRTCNFNLPT	K	L	F	P	R	T	2	1	4	1	0	2	1	0	0	0	2	1	0	2	2	0	0	0	0	1	0	19	1	2214.12	F1MSA4	F1MSA4	43	61	yes	yes	2	0.000689	79.326	matching	matching	matching	matching	matching	matching	matching	matching
LFIGGLSFETTDESLR	KEPGQLRKLFIGGLSF	ETTDESLRSHCSHSPS	K	L	F	L	R	S	0	1	0	1	0	0	2	2	0	1	3	0	0	2	0	2	2	0	0	0	0	16	0	1783.9	F1MH29;F1MW51;F1MTY3;G5E5V7;P09867	F1MH29	15	30	yes	no	2	1.0118e-06	123.76	matching	matching	matching	matching	matching	matching	matching	matching
LFIGGLSFETTEESLR	REKEQFRKLFIGGLSF	ETTEESLRNYYEQWGK	K	L	F	L	R	N	0	1	0	0	0	0	3	2	0	1	3	0	0	2	0	2	2	0	0	0	0	16	0	1797.91	Q2HJ60	Q2HJ60	11	26	yes	yes	2	0.00037714	124.2	matching	matching	matching	matching	matching	matching	matching	matching
LFNDLDVLTNLILLNYIFFK	KTHGKIEKLFNDLDVL	LLNYIFFKAQWKTPFN	K	L	F	F	K	A	0	0	3	2	0	0	0	0	0	2	6	1	0	3	0	0	1	0	1	1	0	20	0	2427.35	CON__REFSEQ:XP_001252647;A0A0A0MP92;CON__A2I7N3;A2I7N3	CON__REFSEQ:XP_001252647	192	211	no	no	2;3	0.00056751	93.215	matching	matching	matching	matching	matching	matching	matching	matching
LFNSFPITVTVPQEVSSPNFMENVAEK	GLTKVIVKLFNSFPIT	FMENVAEKALQQYRRK	K	L	F	E	K	A	1	0	3	0	0	1	3	0	0	1	1	1	1	3	3	3	2	0	0	4	0	27	0	3023.49	P17697;CON__P17697	P17697	401	427	yes	no	2;3	1.8062e-07	93.21	matching	matching	matching	matching	matching	MS/MS	matching	matching
LFRPIEELKK	ERQAKVKRLFRPIEEL	RPIEELKKDFEELNVV	R	L	F	K	K	D	0	1	0	0	0	0	2	0	0	1	2	2	0	1	1	0	0	0	0	0	0	10	2	1271.76	Q32KV6	Q32KV6	161	170	yes	yes	3	0.037791	72.096	matching	matching	matching	matching	matching	matching	matching	matching
LFTGHPETLEK	HGQEVLIRLFTGHPET	GHPETLEKFDKFKHLK	R	L	F	E	K	F	0	0	0	0	0	0	2	1	1	0	2	1	0	1	1	0	2	0	0	0	0	11	0	1270.66	P02192	P02192	33	43	yes	yes	1;2;3	0	263.3	MS/MS	MS/MS	MS/MS	MS/MS	MS/MS	MS/MS	MS/MS	MS/MS
LFTGHPETLEKFDK	HGQEVLIRLFTGHPET	ETLEKFDKFKHLKTEA	R	L	F	D	K	F	0	0	0	1	0	0	2	1	1	0	2	2	0	2	1	0	2	0	0	0	0	14	1	1660.85	P02192	P02192	33	46	yes	yes	3	0.0046702	82.705	matching	matching	matching	matching	matching	matching	matching	matching
LFTGHPETLEKFDKFK	HGQEVLIRLFTGHPET	LEKFDKFKHLKTEAEM	R	L	F	F	K	H	0	0	0	1	0	0	2	1	1	0	2	3	0	3	1	0	2	0	0	0	0	16	2	1936.01	P02192	P02192	33	48	yes	yes	2	6.8736e-115	179.79	matching	matching	matching	matching	matching	matching	matching	matching
LFTMLENSQMR	RENSEWDKLFTMLENS	MLENSQMREGMLLQAT	K	L	F	M	R	E	0	1	1	0	0	1	1	0	0	0	2	0	2	1	0	1	1	0	0	0	0	11	0	1368.65	Q0VCG9;G3X6Q8	Q0VCG9	59	69	yes	no	2	0.021633	86.911	matching	matching	matching	matching	matching	matching	matching	matching
LGAAQVPAQLLVAVLR	ALRVRRLKLGAAQVPA	QLLVAVLRALGYSRLK	K	L	G	L	R	A	4	1	0	0	0	2	0	1	0	0	4	0	0	0	1	0	0	0	0	3	0	16	0	1617.99	Q95122;A6QNL0	Q95122	95	110	yes	no	2;3	4.2948e-18	139.64	MS/MS	matching	MS/MS	MS/MS	MS/MS	MS/MS	MS/MS	MS/MS
LGAPQQPGPGPPPPHSR	ELPELVRRLGAPQQPG	GPPPPHSRRGVQKEGS	R	L	G	S	R	R	1	1	0	0	0	2	0	3	1	0	1	0	0	0	7	1	0	0	0	0	0	17	0	1688.87	G3N3D4	G3N3D4	128	144	yes	yes	3	0.0019017	94.45	matching	matching	matching	matching	matching	MS/MS	matching	matching
LGASPLHVDLATLQELK	LTTYLQEKLGASPLHV	LATLQELKLNASIPAL	K	L	G	L	K	L	2	0	0	1	0	1	1	1	1	0	5	1	0	0	1	1	1	0	0	1	0	17	0	1804.01	P40682	P40682	149	165	yes	yes	3	0.0014755	90.229	matching	matching	matching	matching	matching	matching	matching	matching
LGDLYEEEMR	LKGQGKSRLGDLYEEE	DLYEEEMRELRRQVDQ	R	L	G	M	R	E	0	1	0	1	0	0	3	1	0	0	2	0	1	0	0	0	0	0	1	0	0	10	0	1253.56	P48616	P48616	146	155	yes	yes	2	0.00049538	116.55	matching	MS/MS	matching	matching	matching	MS/MS	matching	matching
LGDVYVNDAFGTAHR	AFRASLSKLGDVYVND	DAFGTAHRAHSSMVGV	K	L	G	H	R	A	2	1	1	2	0	0	0	2	1	0	1	0	0	1	0	0	1	0	1	2	0	15	0	1633.78	Q3T0P6;G3X7N4	Q3T0P6	157	171	yes	no	2;3	0.0024917	88.224	matching	matching	matching	matching	matching	matching	matching	matching
LGEDPDPDAAIEGR	VDGDLGDRLGEDPDPD	PDAAIEGRTSEDHFQP	R	L	G	G	R	T	2	1	0	3	0	0	2	2	0	1	1	0	0	0	2	0	0	0	0	0	0	14	0	1453.67	P00735;CON__P00735	P00735	304	317	yes	no	2	5.6828e-12	153.7	matching	matching	matching	matching	MS/MS	matching	matching	matching
LGEHNIDVLEGNEQFINAAK	YKSRIQVRLGEHNIDV	EQFINAAKIITHPNFN	R	L	G	A	K	I	2	0	3	1	0	1	3	2	1	2	2	1	0	1	0	0	0	0	0	1	0	20	0	2210.1	CON__P00761	CON__P00761	58	77	yes	yes	2;3	0	260.98	MS/MS	MS/MS	MS/MS	MS/MS	MS/MS	MS/MS	MS/MS	MS/MS
LGEHNIEVLEGNEQFINAAK	YKSRIQVRLGEHNIEV	EQFINAAKIIRHPQYD	R	L	G	A	K	I	2	0	3	0	0	1	4	2	1	2	2	1	0	1	0	0	0	0	0	1	0	20	0	2224.11	CON__P07477	CON__P07477	73	92	yes	yes	2	0.034334	55.688	matching	matching	matching	matching	matching	matching	matching	matching
LGEIVTTIPTIGFNVETVEYK	TTILYKLKLGEIVTTI	NVETVEYKNISFTVWD	K	L	G	Y	K	N	0	0	1	0	0	0	3	2	0	3	1	1	0	1	1	0	4	0	1	3	0	21	0	2322.24	Q5E9I6;P84081;P84080;A4IFP7	Q5E9I6	39	59	no	no	2	0.0023958	72.568	matching	matching	matching	matching	matching	matching	matching	matching
LGEMWNNTAADDKQPYEK	SIGDVAKKLGEMWNNT	DDKQPYEKKAAKLKEK	K	L	G	E	K	K	2	0	2	2	0	1	2	1	0	0	1	2	1	0	1	0	1	1	1	0	0	18	1	2108.95	P10103	P10103	129	146	yes	yes	2;3	4.0334e-15	144.17	matching	matching	matching	matching	matching	MS/MS	matching	matching
LGEMWSEQSAK	SIGDTAKKLGEMWSEQ	MWSEQSAKDKQPYEQK	K	L	G	A	K	D	1	0	0	0	0	1	2	1	0	0	1	1	1	0	0	2	0	1	0	0	0	11	0	1264.58	P40673;F1MF42	P40673	129	139	yes	no	2	2.6631e-75	197.07	matching	matching	matching	matching	matching	MS/MS	matching	matching
LGEVSTYTDDLQK	LNTLFQDKLGEVSTYT	TYTDDLQKKLVPFATE	K	L	G	Q	K	K	0	0	0	2	0	1	1	1	0	0	2	1	0	0	0	1	2	0	1	1	0	13	0	1467.71	Q32PJ2;F1N3Q7;CON__Q32PJ2	Q32PJ2	66	78	yes	no	2	2.1361e-95	193	MS/MS	matching	MS/MS	matching	matching	matching	matching	matching
LGEYGFQNALIVR	QNCDQFEKLGEYGFQN	FQNALIVRYTRKVPQV	K	L	G	V	R	Y	1	1	1	0	0	1	1	2	0	1	2	0	0	1	0	0	0	0	1	1	0	13	0	1478.79	P02769;CON__P02769	P02769	421	433	yes	no	1;2;3	0	282.21	MS/MS	MS/MS	MS/MS	MS/MS	MS/MS	MS/MS	MS/MS	MS/MS
LGGRPTYEEYLGTEYVTAIANLK	DNTECLAKLGGRPTYE	VTAIANLKKCSTSPLL	K	L	G	L	K	K	2	1	1	0	0	0	3	3	0	1	3	1	0	0	1	0	3	0	3	1	0	23	1	2557.31	P24627	P24627	670	692	yes	yes	2;3;4	1.5793e-107	167.05	MS/MS	MS/MS	MS/MS	MS/MS	MS/MS	MS/MS	MS/MS	MS/MS
LGGRPTYEEYLGTEYVTAIANLKK	DNTECLAKLGGRPTYE	TAIANLKKCSTSPLLE	K	L	G	K	K	C	2	1	1	0	0	0	3	3	0	1	3	2	0	0	1	0	3	0	3	1	0	24	2	2685.4	P24627	P24627	670	693	yes	yes	3;4	2.3438e-147	176.61	matching	MS/MS	MS/MS	MS/MS	MS/MS	MS/MS	matching	MS/MS
LGGSAVISLEGKPL	DRCTLAEKLGGSAVIS	ISLEGKPL________	K	L	G	P	L	-	1	0	0	0	0	0	1	3	0	1	3	1	0	0	1	2	0	0	0	1	0	14	1	1339.77	Q5E9F7	Q5E9F7	153	166	yes	yes	2	2.1753e-112	182.72	matching	matching	matching	matching	MS/MS	matching	matching	matching
LGGSQEEQITNAIDK	EAIAYGRKLGGSQEEQ	QITNAIDKLFVLFGAE	K	L	G	D	K	L	1	0	1	1	0	2	2	2	0	2	1	1	0	0	0	1	1	0	0	0	0	15	0	1601.79	G5E5C8;Q2TBL6;Q58DR3	G5E5C8	72	86	yes	no	2	0	244	matching	matching	matching	matching	matching	matching	matching	matching
LGGSQEEQITNAIDKLFVLFGAEILK	EAIAYGRKLGGSQEEQ	LFGAEILKKIPGRVST	K	L	G	L	K	K	2	0	1	1	0	2	3	3	0	3	4	2	0	2	0	1	1	0	0	1	0	26	1	2832.53	G5E5C8;Q2TBL6;Q58DR3	G5E5C8	72	97	yes	no	3	1.7953e-23	114.64	matching	matching	matching	matching	MS/MS	MS/MS	matching	matching
LGHYDTLIQK	IFHQYSVRLGHYDTLI	HYDTLIQKEFKQLVQK	R	L	G	Q	K	E	0	0	0	1	0	1	0	1	1	1	2	1	0	0	0	0	1	0	1	0	0	10	0	1186.63	E1BLI9;F1MHS5;P28783	E1BLI9	26	35	no	no	2	2.8693e-71	172.88	matching	matching	matching	matching	matching	MS/MS	matching	matching
LGINSLQELK	HLAEIKRKLGINSLQE	INSLQELKQNIAKGWQ	K	L	G	L	K	Q	0	0	1	0	0	1	1	1	0	1	3	1	0	0	0	1	0	0	0	0	0	10	0	1113.64	F1MBV6;Q3ZCA8;E1BE76	F1MBV6	71	80	yes	no	2	0.0063706	106.16	matching	matching	matching	matching	matching	matching	matching	matching
LGIPSTIVVPSTTPALTIQR	AAAYAARKLGIPSTIV	TPALTIQRLKNEGATV	K	L	G	Q	R	L	1	1	0	0	0	1	0	1	0	3	2	0	0	0	3	2	4	0	0	2	0	20	0	2063.2	Q0VCW4;F1N0R8	Q0VCW4	79	98	yes	no	2;3	2.1631e-72	162.37	matching	matching	matching	matching	MS/MS	MS/MS	matching	matching
LGLGIDEDDPTADDSSAAVTEEMPPLEGDDDTSR	NRIYRMIKLGLGIDED	EGDDDTSRMEEVD___	K	L	G	S	R	M	3	1	0	8	0	0	4	3	0	1	3	0	1	0	3	3	3	0	0	1	0	34	0	3532.52	Q76LV2	Q76LV2	695	728	yes	yes	3	0.00050779	43.103	matching	matching	matching	matching	matching	matching	matching	matching
LGLGPEVAQVTGALPRPEGK	LGPRRLDKLGLGPEVA	ALPRPEGKVLLFSGQS	K	L	G	G	K	V	2	1	0	0	0	1	2	4	0	0	3	1	0	0	3	0	1	0	0	2	0	20	1	1988.11	P52176;F1MF56	P52176	609	628	yes	no	3	0.00019144	94.845	matching	matching	matching	matching	matching	matching	matching	matching
LGLVFDDVVGIVEIINSK	ITVDNCKKLGLVFDDV	IVEIINSKDVKVQVMG	K	L	G	S	K	D	0	0	1	2	0	0	1	2	0	3	2	1	0	1	0	1	0	0	0	4	0	18	0	1929.08	A6QLB7;Q3SYV4	A6QLB7	374	391	no	no	2;3	1.9989e-145	156	matching	matching	matching	matching	MS/MS	MS/MS	matching	matching
LGPLAGDVEDHLSFLEK	QLDTLRQKLGPLAGDV	DHLSFLEKDLRDKVSS	K	L	G	E	K	D	1	0	0	2	0	0	2	2	1	0	4	1	0	1	1	1	0	0	0	1	0	17	0	1838.94	Q32PJ2;F1N3Q7;CON__Q32PJ2	Q32PJ2	329	345	yes	no	2;3	3.1928e-83	169.15	matching	MS/MS	MS/MS	MS/MS	matching	matching	MS/MS	MS/MS
LGPPSEEDYAQPSSPK	KPFDPDLKLGPPSEED	YAQPSSPK________	K	L	G	P	K	-	1	0	0	1	0	1	2	1	0	0	1	1	0	0	4	3	0	0	1	0	0	16	0	1700.79	P28800;CON__P28800	P28800	477	492	yes	no	2	1.4409e-78	179.66	matching	matching	matching	MS/MS	matching	MS/MS	matching	matching
LGPYAEELR	NVRELQQRLGPYAEEL	GPYAEELRTQVDTQAQ	R	L	G	L	R	T	1	1	0	0	0	0	2	1	0	0	2	0	0	0	1	0	0	0	1	0	0	9	0	1046.54	Q32PJ2;F1N3Q7;CON__Q32PJ2	Q32PJ2	135	143	yes	no	2	0.00041362	121.73	matching	MS/MS	matching	matching	MS/MS	MS/MS	MS/MS	matching
LGQEFDEITPDDR	KNTEISFKLGQEFDEI	DEITPDDRKVKSIVNL	K	L	G	D	R	K	0	1	0	3	0	1	2	1	0	1	1	0	0	1	1	0	1	0	0	0	0	13	0	1533.69	P48035;F1MHQ4	P48035	67	79	yes	no	2	3.6262e-14	118.08	matching	matching	matching	matching	matching	matching	matching	matching
LGQLQSIITATSANAELVLETLAEMDGLEDFLSK	AGKVDPEKLGQLQSII	GLEDFLSKDKHADPDF	K	L	G	S	K	D	4	0	1	2	0	2	4	2	0	2	7	1	1	1	0	3	3	0	0	1	0	34	0	3619.85	F1MNW4;CON__Q9TRI1	F1MNW4	538	571	yes	no	3	1.0966e-10	67.072	matching	matching	matching	matching	matching	matching	matching	matching
LGQSDPAPLQHQMDIYQK	VAILDINRLGQSDPAP	HQMDIYQKRCEAFGWN	R	L	G	Q	K	R	1	0	0	2	0	4	0	1	1	1	2	1	1	0	2	1	0	0	1	0	0	18	0	2068	A7E3W4;A7Z014;Q6B855	A7E3W4	160	177	yes	no	2;3	1.6627e-156	187.04	matching	matching	matching	matching	matching	matching	matching	matching
LGSDMEDLR	ELQAAQARLGSDMEDL	GSDMEDLRNRLAQYRS	R	L	G	L	R	N	0	1	0	2	0	0	1	1	0	0	2	0	1	0	0	1	0	0	0	0	0	9	0	1034.47	Q03247;CON__Q03247	Q03247	121	129	yes	no	2	1.9546e-10	147.4	matching	matching	matching	matching	matching	matching	matching	MS/MS
LGVEFDETTADDR	KNTEISFKLGVEFDET	DETTADDRKVKSIVTL	K	L	G	D	R	K	1	1	0	3	0	0	2	1	0	0	1	0	0	1	0	0	2	0	0	1	0	13	0	1466.65	P10790	P10790	67	79	yes	yes	2	0	231.74	MS/MS	matching	MS/MS	MS/MS	MS/MS	matching	MS/MS	MS/MS
LGVEFDETTADDRK	KNTEISFKLGVEFDET	ETTADDRKVKSIVTLD	K	L	G	R	K	V	1	1	0	3	0	0	2	1	0	0	1	1	0	1	0	0	2	0	0	1	0	14	1	1594.75	P10790	P10790	67	80	yes	yes	2;3	0	251.91	MS/MS	MS/MS	matching	MS/MS	MS/MS	matching	MS/MS	MS/MS
LGVNNISGIEEVNMFTNQGTVIHFNNPK	KLQFSLKKLGVNNISG	VIHFNNPKVQASLAAN	K	L	G	P	K	V	0	0	6	0	0	1	2	3	1	3	1	1	1	2	1	1	2	0	0	3	0	28	0	3085.53	Q56JY8	Q56JY8	51	78	yes	yes	3	0.00050954	51.966	matching	matching	matching	matching	matching	matching	matching	matching
LHAGNGVYTFNNK	YQCDKYYKLHAGNGVY	GVYTFNNKQWINKDIG	K	L	H	N	K	Q	1	0	3	0	0	0	0	2	1	0	1	1	0	1	0	0	1	0	1	1	0	13	0	1433.71	Q2TBU0;G3X6K8	Q2TBU0	55	67	yes	no	2;3	8.5771e-180	199.96	matching	MS/MS	MS/MS	MS/MS	MS/MS	MS/MS	matching	matching
LHDEEIQELQAQIQEQHVQIDMDVSKPDLTAALR	EEIAFLKKLHDEEIQE	PDLTAALRDVRQQYES	K	L	H	L	R	D	3	1	0	4	0	6	4	0	2	3	4	1	1	0	1	1	1	0	0	2	0	34	1	3939.96	P48616	P48616	237	270	yes	yes	4;5	1.4031e-16	80.608	matching	matching	matching	matching	matching	MS/MS	matching	matching
LHDVNSDGFLDEQELEALFTK	FDPKTFFKLHDVNSDG	ELEALFTKELEKVYDP	K	L	H	T	K	E	1	0	1	3	0	1	3	1	1	0	4	1	0	2	0	1	1	0	0	1	0	21	0	2419.15	Q0IIH5	Q0IIH5	252	272	yes	yes	2;3	1.3407e-142	190.25	MS/MS	matching	matching	matching	MS/MS	MS/MS	MS/MS	MS/MS
LHETDDFLISLFWGNKK	GDGKPPLKLHETDDFL	SLFWGNKKKLKKLAQN	K	L	H	K	K	K	0	0	1	2	0	0	1	1	1	1	3	2	0	2	0	1	1	1	0	0	0	17	1	2062.05	E1BJZ0	E1BJZ0	664	680	yes	yes	3	0.026912	56.46	matching	matching	matching	matching	matching	matching	matching	matching
LHQTGIVNAWTSGNYDK	RWAPELARLHQTGIVN	WTSGNYDKNPWIQVNL	R	L	H	D	K	N	1	0	2	1	0	1	0	2	1	1	1	1	0	0	0	1	2	1	1	1	0	17	0	1902.92	Q95114;F1MXX6;G3MYW7	Q95114	147	163	yes	no	3	0.00094797	93.738	matching	matching	MS/MS	matching	matching	matching	matching	matching
LHSGIDFGDTSIIDLS	WAAAKDGKLHSGIDFG	DTSIIDLS________	K	L	H	L	S	-	0	0	0	3	0	0	0	2	1	3	2	0	0	1	0	3	1	0	0	0	0	16	0	1688.83	Q32LE5	Q32LE5	293	308	yes	yes	2	3.6099e-10	137.62	matching	matching	matching	matching	matching	MS/MS	matching	matching
LIASLTSDSLR	PWVSGPRKLIASLTSD	SLTSDSLRHVYGELDL	K	L	I	L	R	H	1	1	0	1	0	0	0	0	0	1	3	0	0	0	0	3	1	0	0	0	0	11	0	1174.66	F1MW44	F1MW44	706	716	yes	yes	2	0.031226	76.332	matching	matching	matching	matching	matching	matching	matching	matching
LIAWTSPQNMR	EDQLTAEKLIAWTSPQ	WTSPQNMRKREVDLYL	K	L	I	M	R	K	1	1	1	0	0	1	0	0	0	1	1	0	1	0	1	1	1	1	0	0	0	11	0	1315.67	A6QPZ4;G3X894;G5E537	A6QPZ4	214	224	no	no	2	0.0021202	109.16	matching	matching	matching	matching	matching	matching	matching	matching
LIDDMVAQAMK	QNIWYEHRLIDDMVAQ	DMVAQAMKSEGGFIWA	R	L	I	M	K	S	2	0	0	2	0	1	0	0	0	1	1	1	2	0	0	0	0	0	0	1	0	11	0	1233.61	Q9XSG3	Q9XSG3	250	260	yes	yes	2	0.026102	91.469	matching	matching	matching	matching	matching	matching	matching	matching
LIDIGVAGFR	TVAEYLNRLIDIGVAG	DIGVAGFRIDASKHMW	R	L	I	F	R	I	1	1	0	1	0	0	0	2	0	2	1	0	0	1	0	0	0	0	0	1	0	10	0	1059.61	F1MJQ3;CON__Q3MHH8	F1MJQ3	201	210	yes	no	2	0.0007805	113.93	matching	matching	matching	matching	matching	matching	matching	matching
LIDQYGTHYLQSGSLGGEYK	YDYSAYRRLIDQYGTH	GSLGGEYKVIFHMDSE	R	L	I	Y	K	V	0	0	0	1	0	2	1	4	1	1	3	1	0	0	0	2	1	0	3	0	0	20	0	2228.07	Q29RQ1;F1N045;CON__Q29RQ1	Q29RQ1	295	314	yes	no	3	0.00073958	85.51	matching	matching	matching	matching	matching	matching	matching	matching
LIFPYVELDLHSYDLGIENR	IWELIKEKLIFPYVEL	YDLGIENRDATNDQVT	K	L	I	N	R	D	0	1	1	2	0	0	2	1	1	2	4	0	0	1	1	1	0	0	2	1	0	20	0	2405.23	Q9XSG3	Q9XSG3	30	49	yes	yes	3	0.0092245	60.334	matching	matching	matching	matching	matching	matching	MS/MS	matching
LIITNILGK	DRFSVKNRLIITNILG	IITNILGKILLNCTVT	R	L	I	G	K	I	0	0	1	0	0	0	0	1	0	3	2	1	0	0	0	0	1	0	0	0	0	9	0	983.638	A0JNP2	A0JNP2	75	83	yes	yes	2	2.3841e-18	154.01	MS/MS	matching	MS/MS	matching	matching	MS/MS	MS/MS	MS/MS
LILLNAVALSAK	DSLPEDTRLILLNAVA	NAVALSAKWKIAFDKG	R	L	I	A	K	W	3	0	1	0	0	0	0	0	0	1	4	1	0	0	0	1	0	0	0	1	0	12	0	1224.78	P50448;CON__P50448;E1BMJ0	P50448	261	272	no	no	2	1.333e-23	158.25	matching	matching	matching	matching	matching	matching	matching	matching
LINEYVK	KDSEAAVKLINEYVKN	KLINEYVKNKTHGKIE	K	L	I	V	K	N	0	0	1	0	0	0	1	0	0	1	1	1	0	0	0	0	0	0	1	1	0	7	0	877.491	A0A0A0MPA0;CON__REFSEQ:XP_001252647;A0A0A0MP92;CON__A2I7N3;A2I7N3	A0A0A0MPA0	176	182	no	no	2	0.0021601	83.753	matching	matching	matching	matching	MS/MS	matching	matching	matching
LISDFPETTSPK	EPNSLAFKLISDFPET	FPETTSPKCPSRPWKP	K	L	I	P	K	C	0	0	0	1	0	0	1	0	0	1	1	1	0	1	2	2	2	0	0	0	0	12	0	1333.68	P01045;CON__P01045-1;P01044;CON__P01044-1;CON__Q2KJ62	CON__Q2KJ62	579	590	no	no	2	1.4863e-05	134.98	matching	matching	matching	MS/MS	matching	matching	matching	matching
LISVDTEHSNIYLQNGPNR	ASDYGEKKLISVDTEH	YLQNGPNRIGSVYKKA	K	L	I	N	R	I	0	1	3	1	0	1	1	1	1	2	2	0	0	0	1	2	1	0	1	1	0	19	0	2169.08	F1N076;CON__ENSEMBL:ENSBTAP00000031900	F1N076	44	62	no	no	2;3	0	222.09	matching	MS/MS	MS/MS	MS/MS	MS/MS	MS/MS	matching	matching
LISWYDNEFGYSNR	ALNDHFVKLISWYDNE	NEFGYSNRVVDLMVHM	K	L	I	N	R	V	0	1	2	1	0	0	1	1	0	1	1	0	0	1	0	2	0	1	2	0	0	14	0	1762.8	P10096	P10096	308	321	yes	yes	2	0	234.9	matching	matching	matching	matching	matching	matching	matching	matching
LITEENALENVPLSTR	________________	ENVPLSTRGSPGAGGA	K	L	I	T	R	G	1	1	2	0	0	0	3	0	0	1	3	0	0	0	1	1	2	0	0	1	0	16	0	1797.95	K7DXW3	K7DXW3	5	20	yes	yes	3	0.0032274	93.237	matching	matching	matching	matching	matching	matching	matching	matching
LITLEEEMTK	KEECPAVRLITLEEEM	TLEEEMTKYKPESDEL	R	L	I	T	K	Y	0	0	0	0	0	0	3	0	0	1	2	1	1	0	0	0	2	0	0	0	0	10	0	1205.62	A6H7J6;P05307	A6H7J6	319	328	no	no		1	NaN	matching	matching	matching	matching	matching	matching	matching	matching
LITSVAEVVNNDPVVGSK	YMAKLIIKLITSVAEV	NDPVVGSKLKLIFLEN	K	L	I	S	K	L	1	0	2	1	0	0	1	1	0	1	1	1	0	0	1	2	1	0	0	5	0	18	0	1839.99	Q0VCM4	Q0VCM4	623	640	yes	yes	2	1.4321e-64	163.41	matching	matching	matching	matching	matching	matching	matching	matching
LIVTQTMK	________________	LIVTQTMKGLDIQKVA	-	L	I	M	K	G	0	0	0	0	0	1	0	0	0	1	1	1	1	0	0	0	2	0	0	1	0	8	0	932.536	CON__P02754	CON__P02754	1	8	yes	yes	2	6.3995e-14	159.58	MS/MS	matching	MS/MS	matching	matching	matching	MS/MS	MS/MS
LIVTQTMKGLDIQK	________________	MKGLDIQKVAGTWYSL	-	L	I	Q	K	V	0	0	0	1	0	2	0	1	0	2	2	2	1	0	0	0	2	0	0	1	0	14	1	1586.91	CON__P02754	CON__P02754	1	14	yes	yes	2;3	5.6085e-51	170.74	MS/MS	MS/MS	MS/MS	matching	matching	matching	MS/MS	MS/MS
LKDVDKEFYLFPTVFDENESLLLDDNIK	GTLLANGRLKDVDKEF	LLLDDNIKMFTTAPDQ	R	L	K	I	K	M	0	0	2	5	0	0	3	0	0	1	5	3	0	3	1	1	1	0	1	2	0	28	2	3358.69	F1N076	F1N076	566	593	yes	yes	4	3.0335e-07	72.654	matching	matching	matching	matching	matching	matching	matching	matching
LKHLVDEPQNLIK	CYSTVFDKLKHLVDEP	DEPQNLIKQNCDQFEK	K	L	K	I	K	Q	0	0	1	1	0	1	1	0	1	1	3	2	0	0	1	0	0	0	0	1	0	13	1	1545.89	P02769;CON__P02769	P02769	400	412	yes	no	2;3	1.9301e-37	157.03	matching	matching	matching	matching	matching	MS/MS	matching	matching
LKKEEEINILK	RKAEEEYKLKKEEEIN	EEEINILKAAFEKNIN	K	L	K	L	K	A	0	0	1	0	0	0	3	0	0	2	2	3	0	0	0	0	0	0	0	0	0	11	2	1355.8	Q8MIT6;F1MF50	Q8MIT6	382	392	yes	no	2	0.011665	86.014	matching	matching	matching	matching	MS/MS	matching	matching	matching
LKLKIIPK	KLLIAKFRLKLKIIPK	LKLKIIPKTTRPFRVT	R	L	K	P	K	T	0	0	0	0	0	0	0	0	0	2	2	3	0	0	1	0	0	0	0	0	0	8	2	951.684	O02751;F1MS40;A0JBZ9	O02751	485	492	yes	no	1	0.043273	4.3163	matching	matching	matching	matching	matching	matching	matching	matching
LLDDSGNIAEELSILK	RGSDPVLKLLDDSGNI	AEELSILKWNTDSVEE	K	L	L	L	K	W	1	0	1	2	0	0	2	1	0	2	4	1	0	0	0	2	0	0	0	0	0	16	0	1728.91	A8YXY3	A8YXY3	130	145	yes	yes	2	4.4489e-261	229.69	MS/MS	MS/MS	matching	matching	matching	matching	MS/MS	MS/MS
LLDKFIEDAQVLYSSEAFPTNFR	MFVQEELKLLDKFIED	EAFPTNFRDSEAARSL	K	L	L	F	R	D	2	1	1	2	0	1	2	0	0	1	3	1	0	3	1	2	1	0	1	1	0	23	1	2702.36	Q9TTE1;CON__Q9TTE1;A2I7M9	Q9TTE1	143	165	yes	no	3	0.0010571	61.985	matching	matching	matching	matching	matching	matching	matching	matching
LLDNWDTLASTLSK	LGKQLNLKLLDNWDTL	TLASTLSKVREQLGPV	K	L	L	S	K	V	1	0	1	2	0	0	0	0	0	0	4	1	0	0	0	2	2	1	0	0	0	14	0	1575.81	P15497;CON__P15497	P15497	69	82	yes	no	2	0	263.15	matching	matching	MS/MS	matching	matching	MS/MS	matching	matching
LLDSLPEDTR	KTNLRIRRLLDSLPED	DSLPEDTRLILLNAVA	R	L	L	T	R	L	0	1	0	2	0	0	1	0	0	0	3	0	0	0	1	1	1	0	0	0	0	10	0	1157.59	P50448;CON__P50448;E1BMJ0	P50448	251	260	no	no	2	0.00056065	125.74	matching	MS/MS	MS/MS	matching	MS/MS	matching	matching	MS/MS
LLELDPPPEQDVEHPGAR	SSEANLYRLLELDPPP	DVEHPGARKPVSFTVK	R	L	L	A	R	K	1	1	0	2	0	1	3	1	1	0	3	0	0	0	4	0	0	0	0	1	0	18	0	2011	P56425	P56425	57	74	yes	yes	2;3	3.4963e-08	127.53	matching	matching	MS/MS	MS/MS	MS/MS	MS/MS	matching	matching
LLELDPPPK	SSEANLYRLLELDPPP	LELDPPPKEDDENPNI	R	L	L	P	K	E	0	0	0	1	0	0	1	0	0	0	3	1	0	0	3	0	0	0	0	0	0	9	0	1020.59	P33046;G8JKZ9;P54229;P54228	P54229	57	65	no	no	2	2.4469e-08	150.27	matching	MS/MS	MS/MS	MS/MS	MS/MS	MS/MS	matching	matching
LLELDPPPKDNEDLGTR	SSEANLYRLLELDPPP	DNEDLGTRKPVSFTVK	R	L	L	T	R	K	0	1	1	3	0	0	2	1	0	0	4	1	0	0	3	0	1	0	0	0	0	17	1	1920.98	P33046	P33046	57	73	yes	yes	2;3	5.2717e-05	110.26	matching	matching	MS/MS	MS/MS	MS/MS	MS/MS	matching	MS/MS
LLELDPPPKEDDENPNIPK	SSEANLYRLLELDPPP	DENPNIPKPVSFRVKE	R	L	L	P	K	P	0	0	2	3	0	0	3	0	0	1	3	2	0	0	5	0	0	0	0	0	0	19	1	2172.09	P54229;P54228	P54229	57	75	yes	no	2;3	2.5077e-54	153.72	matching	matching	MS/MS	MS/MS	MS/MS	MS/MS	matching	matching
LLELDPPPKEDDENPNIPKPVSFR	SSEANLYRLLELDPPP	IPKPVSFRVKETVCPR	R	L	L	F	R	V	0	1	2	3	0	0	3	0	0	1	3	2	0	1	6	1	0	0	0	1	0	24	2	2758.42	P54229;P54228	P54229	57	80	yes	no	2;3;4	1.8894e-28	125.77	matching	matching	MS/MS	MS/MS	MS/MS	MS/MS	matching	matching
LLELDPTPNDDLDPGTR	SSEANLYRLLELDPTP	DDLDPGTRKPVSFRVK	R	L	L	T	R	K	0	1	1	4	0	0	1	1	0	0	4	0	0	0	3	0	2	0	0	0	0	17	0	1879.92	P19660	P19660	57	73	yes	yes	2;3	0	249.54	matching	matching	MS/MS	MS/MS	MS/MS	MS/MS	matching	matching
LLELDPTPNDDLDPGTRKPVSFR	SSEANLYRLLELDPTP	TRKPVSFRVKETDCPR	R	L	L	F	R	V	0	2	1	4	0	0	1	1	0	0	4	1	0	1	4	1	2	0	0	1	0	23	2	2594.33	P19660	P19660	57	79	yes	yes	4	0.022297	41.615	matching	matching	matching	matching	matching	matching	matching	matching
LLELDQPPQDDEDPDSPK	SSEPNIYRLLELDQPP	DEDPDSPKRVSFRVKE	R	L	L	P	K	R	0	0	0	5	0	2	2	0	0	0	3	1	0	0	4	1	0	0	0	0	0	18	0	2049.94	P22226	P22226	57	74	yes	yes	2;3	1.834e-224	217.65	matching	MS/MS	MS/MS	MS/MS	MS/MS	MS/MS	matching	matching
LLELDQPPQDDEDPDSPKR	SSEPNIYRLLELDQPP	EDPDSPKRVSFRVKET	R	L	L	K	R	V	0	1	0	5	0	2	2	0	0	0	3	1	0	0	4	1	0	0	0	0	0	19	1	2206.04	P22226	P22226	57	75	yes	yes	2;3;4	0	304.2	matching	MS/MS	MS/MS	MS/MS	MS/MS	MS/MS	matching	MS/MS
LLETIDQLYLEYAK	EALERTEKLLETIDQL	QLYLEYAKRAAPFNNW	K	L	L	A	K	R	1	0	0	1	0	1	2	0	0	1	4	1	0	0	0	0	1	0	2	0	0	14	0	1710.91	Q3B7N2	Q3B7N2	503	516	yes	yes	2	0	225.21	matching	matching	matching	matching	MS/MS	MS/MS	matching	matching
LLGGLMEADVNEEGVQEALSFAVSEFNK	AQGPRKGRLLGGLMEA	FAVSEFNKRSNDAYQS	R	L	L	N	K	R	3	0	2	1	0	1	5	3	0	0	4	1	1	2	0	2	0	0	0	3	0	28	0	2995.45	P01035	P01035	38	65	yes	yes	2;3	2.0333e-86	151	matching	MS/MS	MS/MS	MS/MS	MS/MS	MS/MS	matching	matching
LLGGLMEADVNEEGVQEALSFAVSEFNKR	AQGPRKGRLLGGLMEA	AVSEFNKRSNDAYQSR	R	L	L	K	R	S	3	1	2	1	0	1	5	3	0	0	4	1	1	2	0	2	0	0	0	3	0	29	1	3151.55	P01035	P01035	38	66	yes	yes	3	3.8031e-11	103.36	matching	matching	matching	matching	matching	matching	matching	matching
LLIEMEDWK	LTNMGPTKLLIEMEDW	LIEMEDWKGDKVTALY	K	L	L	W	K	G	0	0	0	1	0	0	2	0	0	1	2	1	1	0	0	0	0	1	0	0	0	9	0	1175.59	F1MAV0;CON__P02676;P02676	F1MAV0	344	352	yes	no	2	6.9289e-12	148.69	matching	matching	matching	matching	matching	MS/MS	matching	matching
LLIYAILPDGEVVGDSAR	SDIAPVARLLIYAILP	EVVGDSARYEIEHCLA	R	L	L	A	R	Y	2	1	0	2	0	0	1	2	0	2	3	0	0	0	1	1	0	0	1	2	0	18	0	1900.03	Q7SIH1;CON__ENSEMBL:ENSBTAP00000024146	Q7SIH1	540	557	yes	no	2;3	2.8533e-11	136.36	matching	MS/MS	MS/MS	MS/MS	MS/MS	MS/MS	matching	MS/MS
LLIYQISNR	HKPGQSPRLLIYQISN	LIYQISNRYTGVPDRF	R	L	L	N	R	Y	0	1	1	0	0	1	0	0	0	2	2	0	0	0	0	1	0	0	1	0	0	9	0	1118.64	F1MZ96	F1MZ96	71	79	yes	yes	2	0.00042554	121.5	matching	matching	matching	matching	matching	matching	matching	matching
LLLFSPSVVR	ALSLQKPRLLLFSPSV	LFSPSVVRIGVPLSVA	R	L	L	V	R	I	0	1	0	0	0	0	0	0	0	0	3	0	0	1	1	2	0	0	0	2	0	10	0	1129.69	E1BH06;CON__P01030;CON__ENSEMBL:ENSBTAP00000007350;F1MVK1	CON__ENSEMBL:ENSBTAP00000007350	23	32	no	no	2	0.0066061	103.26	matching	matching	matching	matching	matching	matching	matching	matching
LLLIGDSGVGK	PEYDYLFKLLLIGDSG	IGDSGVGKSCLLLRFA	K	L	L	G	K	S	0	0	0	1	0	0	0	3	0	1	3	1	0	0	0	1	0	0	0	1	0	11	0	1070.63	Q2HJH2;A1L528;Q3ZBD1;G3MYN4	Q2HJH2	11	21	no	no	2	0.036584	80.834	matching	matching	matching	matching	matching	matching	matching	matching
LLLNNDNLLR	NEVFNDVRLLLNNDNL	LNNDNLLREGAAHAFA	R	L	L	L	R	E	0	1	3	1	0	0	0	0	0	0	5	0	0	0	0	0	0	0	0	0	0	10	0	1196.69	A4FUA8;Q5E997	A4FUA8	38	47	yes	no	2	0.00036738	123.51	matching	matching	matching	matching	matching	matching	matching	matching
LLLPDSLTTWEIHGVSLSK	VDRFSQLRLLLPDSLT	IHGVSLSKTTGLCVAT	R	L	L	S	K	T	0	0	0	1	0	0	1	1	1	1	5	1	0	0	1	3	2	1	0	1	0	19	0	2108.15	CON__ENSEMBL:ENSBTAP00000007350	CON__ENSEMBL:ENSBTAP00000007350	796	814	yes	yes	3	0.0016436	79.337	matching	matching	matching	matching	matching	MS/MS	matching	matching
LLLQEVALPEIPGK	FQVDEAKRLLLQEVAL	ALPEIPGKYSTAVTGS	R	L	L	G	K	Y	1	0	0	0	0	1	2	1	0	1	4	1	0	0	2	0	0	0	0	1	0	14	0	1518.9	F1MI18;F1MJK3	F1MI18	1299	1312	yes	no	2	0.0066882	102.63	matching	matching	matching	matching	matching	matching	matching	matching
LLLSSLEEAK	EQTNEERKLLLSSLEE	LSSLEEAKKKKEDALN	K	L	L	A	K	K	1	0	0	0	0	0	2	0	0	0	4	1	0	0	0	2	0	0	0	0	0	10	0	1101.63	P17697;CON__P17697	P17697	63	72	yes	no	2	2.6147e-97	200.71	MS/MS	matching	matching	matching	matching	matching	MS/MS	matching
LLLSSLEEAKK	EQTNEERKLLLSSLEE	SSLEEAKKKKEDALND	K	L	L	K	K	K	1	0	0	0	0	0	2	0	0	0	4	2	0	0	0	2	0	0	0	0	0	11	1	1229.72	P17697;CON__P17697	P17697	63	73	yes	no	2;3	0.029888	84.687	matching	matching	matching	matching	matching	MS/MS	matching	matching
LLNDLDVLTNLILLNYIFFK	KTHGKIEKLLNDLDVL	LLNYIFFKAQWKTPFN	K	L	L	F	K	A	0	0	3	2	0	0	0	0	0	2	7	1	0	2	0	0	1	0	1	1	0	20	0	2393.36	A0A0A0MPA0	A0A0A0MPA0	192	211	yes	yes	3	0.02864	62.658	matching	matching	matching	matching	matching	matching	matching	matching
LLNGTPLFGPPGPPAAASPFHR	RKPGGGLKLLNGTPLF	AAASPFHRMTSRLVLP	K	L	L	H	R	M	3	1	1	0	0	0	0	3	1	0	3	0	0	2	6	1	1	0	0	0	0	22	0	2213.17	F1MMD7;Q3T052;CON__Q3T052	F1MMD7	644	665	yes	no	3	1.7524e-06	109.5	matching	matching	matching	matching	matching	matching	matching	matching
LLPNQGLHFSISDSFIQVTGDWK	KLLGSALKLLPNQGLH	IQVTGDWKVRKRILRL	K	L	L	W	K	V	0	0	1	2	0	2	0	2	1	2	3	1	0	2	1	3	1	1	0	1	0	23	0	2601.32	Q2TBI0;F1MNN7	Q2TBI0	95	117	yes	no	3	2.1511e-05	96.881	matching	matching	matching	matching	matching	MS/MS	matching	matching
LLPQLTYLDGYDR	DYRENVFKLLPQLTYL	TYLDGYDRDDKEAPDS	K	L	L	D	R	D	0	1	0	2	0	1	0	1	0	0	4	0	0	0	1	0	1	0	2	0	0	13	0	1565.81	P51122;F1MZ46;Q3SZC6	P51122	138	150	yes	no	2	0.014006	83.292	matching	matching	matching	matching	matching	matching	matching	matching
LLPVGQTVFITIETPDGIPVK	RVFTVDHKLLPVGQTV	TPDGIPVKRDSKSSQN	K	L	L	V	K	R	0	0	0	1	0	1	1	2	0	3	2	1	0	1	3	0	3	0	0	3	0	21	0	2236.27	Q2UVX4;CON__Q2UVX4;G3X7A5	Q2UVX4	155	175	yes	no	2;3	9.3035e-126	190.57	matching	MS/MS	matching	MS/MS	MS/MS	MS/MS	matching	matching
LLPVGQTVFITIETPDGIPVKR	RVFTVDHKLLPVGQTV	PDGIPVKRDSKSSQNQ	K	L	L	K	R	D	0	1	0	1	0	1	1	2	0	3	2	1	0	1	3	0	3	0	0	3	0	22	1	2392.37	Q2UVX4;CON__Q2UVX4;G3X7A5	Q2UVX4	155	176	yes	no	2;3	0.001898	61.276	matching	MS/MS	matching	matching	matching	MS/MS	matching	matching
LLQDFFNGK	TRIPKIQKLLQDFFNG	LQDFFNGKELNKSINP	K	L	L	G	K	E	0	0	1	1	0	1	0	1	0	0	2	1	0	2	0	0	0	0	0	0	0	9	0	1080.56	P19120;P34933	P19120	349	357	yes	no	2	3.1078e-12	142	matching	matching	matching	matching	matching	matching	matching	matching
LLSNGQPLSQGAGSHVVQNGDNLEVR	NNDRTYWKLLSNGQPL	NGDNLEVRWSKY____	K	L	L	V	R	W	1	1	3	1	0	3	1	4	1	0	4	0	0	0	1	3	0	0	0	3	0	26	0	2688.36	E1BCU6	E1BCU6	398	423	yes	yes	3	1.5065e-23	114.64	matching	matching	MS/MS	MS/MS	MS/MS	MS/MS	matching	matching
LLSPQPSEAPELDEDEGFGDWSQKPEQQR	PEQSEQEKLLSPQPSE	SQKPEQQRQQHWGAGE	K	L	L	Q	R	Q	1	1	0	3	0	4	5	2	0	0	3	1	0	1	4	3	0	1	0	0	0	29	1	3311.52	Q0P5E0	Q0P5E0	69	97	yes	yes	3	0.00074894	59.628	matching	matching	matching	matching	matching	MS/MS	matching	matching
LLSTLAEEPSEQQELETLSQDPRR	PPSPRLLRLLSTLAEE	TLSQDPRRYEEWKWFR	R	L	L	R	R	Y	1	2	0	1	0	3	5	0	0	0	5	0	0	0	2	3	2	0	0	0	0	24	1	2768.38	P29473;F1MY54	P29473	878	901	yes	no	3	0.00024629	66.448	matching	matching	matching	matching	matching	matching	matching	matching
LLTEDIYQPR	WTRPQKPRLLTEDIYQ	TEDIYQPRAPSAEVEM	R	L	L	P	R	A	0	1	0	1	0	1	1	0	0	1	2	0	0	0	1	0	1	0	1	0	0	10	0	1246.66	Q7SIH1;CON__ENSEMBL:ENSBTAP00000024146	Q7SIH1	1228	1237	yes	no	2	1.0385e-16	167.09	matching	matching	matching	matching	matching	matching	matching	matching
LLVILATEQPLTTK	IEGGALQKLLVILATE	TEQPLTTKKKALFALC	K	L	L	T	K	K	1	0	0	0	0	1	1	0	0	1	4	1	0	0	1	0	3	0	0	1	0	14	0	1538.93	Q32KV6	Q32KV6	274	287	yes	yes	2	0.0075811	92.269	matching	matching	matching	matching	matching	matching	matching	matching
LLVSNLDFGVSDADIQELFAEFGTLK	AGVETGGKLLVSNLDF	FAEFGTLKKAAVHYDR	K	L	L	L	K	K	2	0	1	3	0	1	2	2	0	1	5	1	0	3	0	2	1	0	0	2	0	26	0	2840.45	Q3T0I4	Q3T0I4	108	133	yes	yes	3	1.727e-19	110.13	matching	matching	matching	matching	matching	matching	matching	matching
LLVVSNPVDILTYVAWK	VKYSPNCKLLVVSNPV	ILTYVAWKISGFPKNR	K	L	L	W	K	I	1	0	1	1	0	0	0	0	0	1	3	1	0	0	1	1	1	1	1	4	0	17	0	1929.1	P19858	P19858	133	149	yes	yes	2	0.010031	71.263	matching	matching	matching	matching	matching	matching	matching	matching
LMEELNLMLEEVKSSKGQLK	EFSGEKNRLMEELNLM	KSSKGQLKELMLENSE	R	L	M	L	K	E	0	0	1	0	0	1	4	1	0	0	5	3	2	0	0	2	0	0	0	1	0	20	2	2318.22	F1N1F8	F1N1F8	2609	2628	yes	yes	3	0.040219	40.432	MS/MS	matching	matching	matching	matching	matching	matching	matching
LMELGHK	DASTTEGKLMELGHKI	KLMELGHKIMRNLENT	K	L	M	H	K	I	0	0	0	0	0	0	1	1	1	0	2	1	1	0	0	0	0	0	0	0	0	7	0	826.437	P80195	P80195	118	124	yes	yes	2	7.286e-11	124.34	matching	matching	matching	matching	matching	matching	MS/MS	matching
LMIEMDGTENK	VEQEKIDKLMIEMDGT	EMDGTENKSKFGANAI	K	L	M	N	K	S	0	0	1	1	0	0	2	1	0	1	1	1	2	0	0	0	1	0	0	0	0	11	0	1279.58	Q9XSJ4;F1MB08	Q9XSJ4	93	103	yes	no	2	4.1936e-05	134.75	matching	matching	matching	matching	matching	MS/MS	matching	matching
LMLLLEVISGER	EDFRDGLKLMLLLEVI	LEVISGERLPKPERGK	K	L	M	E	R	L	0	1	0	0	0	0	2	1	0	1	4	0	1	0	0	1	0	0	0	1	0	12	0	1371.78	Q3B7N2;Q3ZC55;F1MRD4;Q0III9;G3X7I1;A5D7D1	A5D7D1	84	95	no	no	2	0.013194	95.417	matching	matching	matching	matching	matching	matching	matching	matching
LMNEFTNMPVPPK	PMIDSFVRLMNEFTNM	TNMPVPPKPRQALGDK	R	L	M	P	K	P	0	0	2	0	0	0	1	0	0	0	1	1	2	1	3	0	1	0	0	1	0	13	0	1516.74	A5PJS6	A5PJS6	470	482	yes	yes	3	0.0026803	103.43	MS/MS	matching	MS/MS	matching	matching	matching	MS/MS	matching
LMNVFLK	DKNGISTKLMNVFLKD	KLMNVFLKDSITTWEI	K	L	M	L	K	D	0	0	1	0	0	0	0	0	0	0	2	1	1	1	0	0	0	0	0	1	0	7	0	863.494	Q2UVX4;CON__Q2UVX4;G3X7A5	Q2UVX4	789	795	yes	no	2	2.6254e-20	143.02	MS/MS	MS/MS	MS/MS	matching	MS/MS	MS/MS	MS/MS	MS/MS
LMQYDIVIK	YEEVLRRKLMQYDIVI	MQYDIVIKVKPQQLVQ	K	L	M	I	K	V	0	0	0	1	0	1	0	0	0	2	1	1	1	0	0	0	0	0	1	1	0	9	0	1121.62	Q0VCM5;F1MMP5;CON__Q0VCM5	Q0VCM5	167	175	yes	no	2	4.3927e-07	140.45	matching	matching	matching	matching	matching	matching	matching	matching
LNAEHDGAFYFK	PLSHSIAKLNAEHDGA	HDGAFYFKIDTVKKAT	K	L	N	F	K	I	2	0	1	1	0	0	1	1	1	0	1	1	0	2	0	0	0	0	1	0	0	12	0	1410.66	P01044;CON__P01044-1;F1MNV5;CON__Q2KJ62	CON__Q2KJ62	288	299	no	no	2;3	4.9052e-59	173.19	matching	matching	matching	matching	matching	matching	MS/MS	MS/MS
LNAEHDGTFYFK	ALNHSIAKLNAEHDGT	HDGTFYFKIDTVKKAT	K	L	N	F	K	I	1	0	1	1	0	0	1	1	1	0	1	1	0	2	0	0	1	0	1	0	0	12	0	1440.67	P01045;CON__P01045-1	P01045	286	297	yes	no	2;3	1.4683e-45	177.16	matching	matching	matching	MS/MS	MS/MS	MS/MS	matching	matching
LNDLEDALQQAK	ALKDAKNKLNDLEDAL	EDALQQAKEDLARLLR	K	L	N	A	K	E	2	0	1	2	0	2	1	0	0	0	3	1	0	0	0	0	0	0	0	0	0	12	0	1356.69	CON__P04264	CON__P04264	444	455	yes	yes	2	6.1901e-200	206.74	matching	matching	matching	matching	matching	matching	matching	matching
LNHQLEGLAFQMK	YAQDVQGKLNHQLEGL	EGLAFQMKKHAEELKA	K	L	N	M	K	K	1	0	1	0	0	2	1	1	1	0	3	1	1	1	0	0	0	0	0	0	0	13	0	1527.79	Q32PJ2;F1N3Q7;CON__Q32PJ2	Q32PJ2	234	246	yes	no	2;3	3.8505e-05	149.57	matching	matching	MS/MS	MS/MS	matching	matching	MS/MS	matching
LNLAFIANLFNK	DVVRGNPKLNLAFIAN	FIANLFNKYPALHKPE	K	L	N	N	K	Y	2	0	3	0	0	0	0	0	0	1	3	1	0	2	0	0	0	0	0	0	0	12	0	1376.78	F1MYX5	F1MYX5	362	373	yes	yes	2	8.2507e-111	186.74	matching	matching	matching	matching	matching	matching	matching	matching
LNLEAINYLSAGGDFK	YEFKFPNRLNLEAINY	LSAGGDFKIKCVAFE_	R	L	N	F	K	I	2	0	2	1	0	0	1	2	0	1	3	1	0	1	0	1	0	0	1	0	0	16	0	1723.88	P11116	P11116	113	128	yes	yes	2	2.3383e-125	187.39	matching	matching	matching	matching	matching	MS/MS	matching	matching
LNLLNAQFAFDLYR	PGKSRVQRLNLLNAQF	QFAFDLYRALAARVGA	R	L	N	Y	R	A	2	1	2	1	0	1	0	0	0	0	4	0	0	2	0	0	0	0	1	0	0	14	0	1696.89	CON__ENSEMBL:ENSBTAP00000018574;A6QPP2	CON__ENSEMBL:ENSBTAP00000018574	123	136	yes	no	2	1.9561e-13	143.05	matching	matching	matching	matching	matching	matching	matching	matching
LNSFLGDDIFLR	KDLSQLTKLNSFLGDD	LGDDIFLREISNVKQE	K	L	N	L	R	E	0	1	1	2	0	0	0	1	0	1	3	0	0	2	0	1	0	0	0	0	0	12	0	1408.74	Q0VCM4	Q0VCM4	522	533	yes	yes	2	2.7301e-61	174.46	matching	matching	matching	matching	matching	MS/MS	matching	matching
LPAQDQGVGEGVR	NANVQVARLPAQDQGV	QGVGEGVRCVAMGWGR	R	L	P	V	R	C	1	1	0	1	0	2	1	3	0	0	1	0	0	0	1	0	0	0	0	2	0	13	0	1324.67	A6QPP7;G3MWP1	A6QPP7	138	150	yes	no	2	3.2042e-19	157.33	matching	matching	matching	MS/MS	MS/MS	matching	matching	matching
LPENVTPEEQHK	________________	VTPEEQHKGTSVIHKA	-	L	P	H	K	G	0	0	1	0	0	1	3	0	1	0	1	1	0	0	2	0	1	0	0	1	0	12	0	1419.7	CON__ENSEMBL:ENSBTAP00000038329	CON__ENSEMBL:ENSBTAP00000038329	1	12	yes	yes	3	0.0026042	100.09	matching	matching	matching	matching	matching	matching	matching	matching
LPFPIIDDK	NGEEPTEKLPFPIIDD	PFPIIDDKNRDLAIQL	K	L	P	D	K	N	0	0	0	2	0	0	0	0	0	2	1	1	0	1	2	0	0	0	0	0	0	9	0	1056.59	O77834	O77834	98	106	yes	yes	2	8.1039e-33	155.58	matching	matching	matching	matching	matching	MS/MS	matching	matching
LPGIVAEGR	LFSPEKSRLPGIVAEG	PGIVAEGRSDLYVSDA	R	L	P	G	R	S	1	1	0	0	0	0	1	2	0	1	1	0	0	0	1	0	0	0	0	1	0	9	0	910.524	P41361;F1MSZ6;CON__P41361	P41361	384	392	yes	no	2	0.0061841	99.688	matching	matching	matching	matching	matching	MS/MS	MS/MS	MS/MS
LPLQDVYK	CPTDKPLRLPLQDVYK	LPLQDVYKIGGIGTVP	R	L	P	Y	K	I	0	0	0	1	0	1	0	0	0	0	2	1	0	0	1	0	0	0	1	1	0	8	0	974.544	E1BED8;P68103;E1B9F6;E1BPF4;E1B7J1;Q32PH8;G3N0P6	E1BED8	229	236	yes	no	2	0.0040374	99.136	matching	matching	matching	matching	matching	MS/MS	matching	matching
LPNTELVK	MIAEFAEKLPNTELVK	LPNTELVKEFKAAATD	K	L	P	V	K	E	0	0	1	0	0	0	1	0	0	0	2	1	0	0	1	0	1	0	0	1	0	8	0	912.528	Q2KIH2;CON__Q2KIH2	Q2KIH2	175	182	yes	no	2	0.027289	76.221	matching	matching	matching	matching	matching	matching	matching	matching
LPPLSLLK	MDGQAQQKLPPLSLLK	LPPLSLLKLDNQEPGG	K	L	P	L	K	L	0	0	0	0	0	0	0	0	0	0	4	1	0	0	2	1	0	0	0	0	0	8	0	879.579	P28800;CON__P28800	P28800	45	52	yes	no	2	0.0025183	101.6	matching	matching	matching	MS/MS	matching	matching	matching	matching
LPPNVVEESAR	VSESLSLKLPPNVVEE	NVVEESARASFSVLGD	K	L	P	A	R	A	1	1	1	0	0	0	2	0	0	0	1	0	0	0	2	1	0	0	0	2	0	11	0	1209.64	Q7SIH1;CON__ENSEMBL:ENSBTAP00000024146	Q7SIH1	972	982	yes	no	2	0.0011675	138.89	matching	MS/MS	MS/MS	MS/MS	MS/MS	MS/MS	matching	matching
LPQLVGVHPPLQGSSHGAAAIGQPSGELR	LAGRDLRRLPQLVGVH	GQPSGELRLRGVAPPP	R	L	P	L	R	L	3	1	0	0	0	3	1	5	2	1	4	0	0	0	4	3	0	0	0	2	0	29	0	2872.53	P08037	P08037	50	78	yes	yes	3;4	1.2337e-13	75.868	matching	matching	matching	matching	matching	matching	MS/MS	matching
LPSNVVEGSAR	GSEKLSLKLPSNVVEG	NVVEGSARATYSVLGD	K	L	P	A	R	A	1	1	1	0	0	0	1	1	0	0	1	0	0	0	1	2	0	0	0	2	0	11	0	1127.59	F1MI18;F1MJK3	F1MI18	937	947	yes	no	2	0.0036952	105.66	matching	matching	matching	matching	matching	matching	matching	matching
LPYDVTPEQALSHEEVR	SQTGEASKLPYDVTPE	ALSHEEVRTRLDNSIR	K	L	P	V	R	T	1	1	0	1	0	1	3	0	1	0	2	0	0	0	2	1	1	0	1	2	0	17	0	1981.97	F1MC48	F1MC48	1063	1079	yes	yes	3	0.00050525	82.529	matching	matching	matching	matching	matching	matching	matching	matching
LPYSVVR	QDFFIDLRLPYSVVRN	RLPYSVVRNEQVEIRA	R	L	P	V	R	N	0	1	0	0	0	0	0	0	0	0	1	0	0	0	1	1	0	0	1	2	0	7	0	832.481	Q2UVX4;CON__Q2UVX4;G3X7A5	Q2UVX4	834	840	yes	no	2	0.0095691	87.754	matching	matching	matching	matching	MS/MS	MS/MS	matching	matching
LPYTASSGLMAPK	IPALLLIRLPYTASSG	SSGLMAPKEVLMGNDE	R	L	P	P	K	E	2	0	0	0	0	0	0	1	0	0	2	1	1	0	2	2	1	0	1	0	0	13	0	1334.69	P40682	P40682	178	190	yes	yes	2	0.025281	70.438	matching	matching	matching	matching	matching	matching	matching	matching
LQALANEQAAAAHELEK	LLKAEVQKLQALANEQ	AAAHELEKMQKSIHVK	K	L	Q	E	K	M	6	0	1	0	0	2	3	0	1	0	3	1	0	0	0	0	0	0	0	0	0	17	0	1805.93	F1MLU7	F1MLU7	654	670	yes	yes	2	0.012877	71.781	matching	matching	MS/MS	matching	matching	matching	matching	matching
LQAMWLEAHYQEAEK	FTKESHGKLQAMWLEA	AHYQEAEKLRGRPLGP	K	L	Q	E	K	L	3	0	0	0	0	2	3	0	1	0	2	1	1	0	0	0	0	1	1	0	0	15	0	1845.87	E1BMT1	E1BMT1	161	175	yes	yes	2	0.004412	92.151	matching	matching	matching	matching	matching	matching	matching	matching
LQATVQELQK	RLEEEMRKLQATVQEL	ATVQELQKRLDRLEET	K	L	Q	Q	K	R	1	0	0	0	0	3	1	0	0	0	2	1	0	0	0	0	1	0	0	1	0	10	0	1156.65	Q92176	Q92176	440	449	yes	yes	2	0.0002398	117.14	matching	matching	matching	matching	matching	MS/MS	matching	matching
LQDAPSGQVVR	VPLSVAVKLQDAPSGQ	APSGQVVRGSVFLRNP	K	L	Q	V	R	G	1	1	0	1	0	2	0	1	0	0	1	0	0	0	1	1	0	0	0	2	0	11	0	1168.62	E1BH06;CON__P01030;CON__ENSEMBL:ENSBTAP00000007350	CON__ENSEMBL:ENSBTAP00000007350	43	53	no	no	2	0.02711	82.85	matching	MS/MS	matching	matching	matching	matching	matching	matching
LQDEIQNMKEEMAR	NYQDTIGRLQDEIQNM	NMKEEMARHLREYQDL	R	L	Q	A	R	H	1	1	1	1	0	2	3	0	0	1	1	1	2	0	0	0	0	0	0	0	0	14	1	1733.81	P48616	P48616	365	378	no	no		1	NaN	matching	matching	matching	matching	matching	matching	matching	matching
LQDQQVPYAVK	LQGAKITRLQDQQVPY	QQVPYAVKGNQWVGYD	R	L	Q	V	K	G	1	0	0	1	0	3	0	0	0	0	1	1	0	0	1	0	0	0	1	2	0	11	0	1287.68	E1BFD0	E1BFD0	322	332	yes	yes	2	0.040404	79.036	matching	matching	matching	matching	matching	matching	matching	matching
LQEEMLQR	DIMRLREKLQEEMLQR	LQEEMLQREEAESTLQ	K	L	Q	Q	R	E	0	1	0	0	0	2	2	0	0	0	2	0	1	0	0	0	0	0	0	0	0	8	0	1045.52	P48616	P48616	189	196	yes	yes	2	0.00044633	112.11	matching	matching	matching	matching	matching	matching	matching	matching
LQETAMWLLSQQR	QVGGSPEKLQETAMWL	MWLLSQQRDDGSFHDP	K	L	Q	Q	R	D	1	1	0	0	0	3	1	0	0	0	3	0	1	0	0	1	1	1	0	0	0	13	0	1602.82	CON__ENSEMBL:ENSBTAP00000007350	CON__ENSEMBL:ENSBTAP00000007350	1099	1111	yes	yes	2	0.0013416	102.15	matching	matching	matching	matching	matching	matching	matching	matching
LQGGLSQLSFPLSVEPALGPYK	IFQWPSFKLQGGLSQL	EPALGPYKVVLLKEPG	K	L	Q	Y	K	V	1	0	0	0	0	2	1	3	0	0	5	1	0	1	3	3	0	0	1	1	0	22	0	2300.24	F1MI18;F1MJK3	F1MI18	177	198	no	no	2;3	9.4703e-17	119.18	matching	matching	matching	matching	matching	matching	matching	matching
LQGMENLEDVFVQMLDESR	DKEKHVFKLQGMENLE	VQMLDESRTLGLCGMV	K	L	Q	S	R	T	0	1	1	2	0	2	3	1	0	0	3	0	2	1	0	1	0	0	0	2	0	19	0	2252.05	CON__Q3KUS7;P81187	CON__Q3KUS7	454	472	yes	no	2;3	6.3064e-268	210.91	matching	MS/MS	MS/MS	MS/MS	MS/MS	MS/MS	MS/MS	matching
LQHAAQMEQK	ADVVLLQKLQHAAQME	HAAQMEQKQNDTENKK	K	L	Q	Q	K	Q	2	0	0	0	0	3	1	0	1	0	1	1	1	0	0	0	0	0	0	0	0	10	0	1182.58	Q8WN95;E1BKE7	Q8WN95	93	102	yes	no	2	0.021007	82.645	matching	matching	matching	matching	matching	matching	matching	MS/MS
LQLEPGKEYLIMGLDGATYDLK	FLVRASCRLQLEPGKE	DGATYDLKGDPQYLLD	R	L	Q	L	K	G	1	0	0	2	0	1	2	3	0	1	5	2	1	0	1	0	1	0	2	0	0	22	1	2466.27	E1BH06;CON__P01030;P01030;CON__ENSEMBL:ENSBTAP00000007350	CON__ENSEMBL:ENSBTAP00000007350	1673	1694	no	no	3	2.4588e-106	162.44	matching	matching	MS/MS	matching	matching	MS/MS	matching	matching
LQMVVKTFMDMDQDSEDEK	________________	DQDSEDEKQQYLPLAL	-	L	Q	E	K	Q	0	0	0	4	0	2	2	0	0	0	1	2	3	1	0	1	1	0	0	2	0	19	1	2288	E1BKG4	E1BKG4	1	19	yes	yes	2	0.017138	87.99	matching	matching	matching	matching	matching	matching	matching	matching
LQNEDLGFL	VLPWLKEKLQNEDLGF	QNEDLGFL________	K	L	Q	F	L	-	0	0	1	1	0	1	1	1	0	0	3	0	0	1	0	0	0	0	0	0	0	9	0	1047.52	CON__Q3KUS7;P81187	CON__Q3KUS7	752	760	yes	no	2	2.8294e-17	146.81	matching	matching	matching	MS/MS	MS/MS	MS/MS	matching	matching
LQPLDFK	SEVVYGAKLQPLDFKG	KLQPLDFKGNAEQSRL	K	L	Q	F	K	G	0	0	0	1	0	1	0	0	0	0	2	1	0	1	1	0	0	0	0	0	0	7	0	859.48	P41361;F1MSZ6;CON__P41361	P41361	203	209	yes	no	2	0.01975	73.26	matching	matching	matching	matching	matching	matching	matching	matching
LQQELDDLLVDLDHQR	KLEKTKTRLQQELDDL	LVDLDHQRQSVSNLEK	R	L	Q	Q	R	Q	0	1	0	4	0	3	1	0	1	0	5	0	0	0	0	0	0	0	0	1	0	16	0	1948.99	F1MQ37;Q27991	F1MQ37	1418	1433	yes	no	3	0.0021405	85.006	matching	matching	matching	matching	matching	matching	matching	matching
LQQLEDKLNNELLAK	FILPDLGKLQQLEDKL	LNNELLAKFLEKKYAS	K	L	Q	A	K	F	1	0	2	1	0	2	2	0	0	0	5	2	0	0	0	0	0	0	0	0	0	15	1	1767.97	P34955;CON__P34955	P34955	282	296	yes	no	2;3	8.551e-39	154.81	matching	MS/MS	matching	MS/MS	MS/MS	MS/MS	matching	MS/MS
LQSIGTENTEENR	STGSIAKRLQSIGTEN	TENTEENRRFYRQLLL	R	L	Q	N	R	R	0	1	2	0	0	1	3	1	0	1	1	0	0	0	0	1	2	0	0	0	0	13	0	1489.7	A6QLL8	A6QLL8	44	56	yes	yes	2	2.5205e-234	209.19	matching	matching	matching	matching	matching	matching	matching	matching
LQSLFDAPDFSK	TKSVQELKLQSLFDAP	FDAPDFSKITGKPIKL	K	L	Q	S	K	I	1	0	0	2	0	1	0	0	0	0	2	1	0	2	1	2	0	0	0	0	0	12	0	1366.68	Q95121;CON__Q95121	Q95121	332	343	yes	no	2	0.037206	71.879	matching	matching	matching	matching	matching	matching	matching	matching
LQTYVLPSIDPHLEVPPIVEVGSR	QNTSAPRKLQTYVLPS	PIVEVGSRWPVNCTLD	K	L	Q	S	R	W	0	1	0	1	0	1	2	1	1	2	3	0	0	0	4	2	1	0	1	4	0	24	0	2657.44	Q95132;F1MI38	Q95132	209	232	yes	no	3	3.2348e-09	100.95	matching	matching	matching	matching	matching	MS/MS	matching	matching
LQVELDNVTGLLTQSDSK	ELADKVSKLQVELDNV	LLTQSDSKSSKLTKDF	K	L	Q	S	K	S	0	0	1	2	0	2	1	1	0	0	4	1	0	0	0	2	2	0	0	2	0	18	0	1959.02	F1MQ37	F1MQ37	1278	1295	yes	yes	2	0.00026861	102.67	matching	matching	matching	matching	matching	matching	matching	matching
LQVLGEGLLAPQPK	RLHLEGNRLQVLGEGL	GLLAPQPKLRYLFLND	R	L	Q	P	K	L	1	0	0	0	0	2	1	2	0	0	4	1	0	0	2	0	0	0	0	1	0	14	0	1461.86	Q2KIF2;CON__Q2KIF2	Q2KIF2	223	236	yes	no	2	3.7072e-19	145.86	matching	MS/MS	matching	MS/MS	matching	matching	matching	matching
LRPVAAEIYGTK	EAGRDPYKLRPVAAEI	AAEIYGTKESPQTHYY	K	L	R	T	K	E	2	1	0	0	0	0	1	1	0	1	1	1	0	0	1	0	1	0	1	1	0	12	1	1316.75	P24627	P24627	93	104	yes	yes	1;2;3	1.8404e-107	193.15	MS/MS	MS/MS	MS/MS	MS/MS	MS/MS	matching	MS/MS	MS/MS
LSDLLAPISEQIQEVVTFR	CQQPAGNKLSDLLAPI	IQEVVTFREKNRGSKL	K	L	S	F	R	E	1	1	0	1	0	2	2	0	0	2	3	0	0	1	1	2	1	0	0	2	0	19	0	2157.17	A6QLB7;Q3SYV4	A6QLB7	100	118	no	no	2;3	9.1239e-158	190.1	matching	matching	matching	matching	matching	MS/MS	matching	matching
LSEIDVSTEGVK	SGLHVLARLSEIDVST	DVSTEGVKGAKSFFEA	R	L	S	V	K	G	0	0	0	1	0	0	2	1	0	1	1	1	0	0	0	2	1	0	0	2	0	12	0	1275.66	A5D7A0	A5D7A0	179	190	yes	yes	2	0.0014885	124.48	matching	matching	matching	matching	matching	matching	matching	matching
LSFNPTQLEEQCHI	KALPMHIRLSFNPTQL	QLEEQCHI________	R	L	S	H	I	-	0	0	1	0	1	2	2	0	1	1	2	0	0	1	1	1	1	0	0	0	0	14	0	1714.8	CON__P02754;P02754;G5E5H7	CON__P02754	149	162	yes	no	2	0	244.71	matching	matching	matching	matching	matching	matching	MS/MS	matching
LSFVTVDSNLR	EITTTITKLSFVTVDS	VTVDSNLRRGIPFTGK	K	L	S	L	R	R	0	1	1	1	0	0	0	0	0	0	2	0	0	1	0	2	1	0	0	2	0	11	0	1249.67	Q7SIH1;CON__ENSEMBL:ENSBTAP00000024146	Q7SIH1	350	360	yes	no	2	2.0702e-16	145.14	matching	MS/MS	matching	MS/MS	matching	MS/MS	matching	matching
LSGQLPSPSKPVPFTEVLYNAQR	RQSAFTVKLSGQLPSP	EVLYNAQRDLQEDTGV	K	L	S	Q	R	D	1	1	1	0	0	2	1	1	0	0	3	1	0	1	4	3	1	0	1	2	0	23	1	2527.34	Q2KIT0;CON__Q2KIT0	Q2KIT0	75	97	yes	no	2;3	7.2996e-123	190.37	matching	MS/MS	MS/MS	matching	matching	MS/MS	matching	MS/MS
LSGSNPYTTVTPQIINSK	IAESNHIKLSGSNPYT	TPQIINSKWEKVQQLV	K	L	S	S	K	W	0	0	2	0	0	1	0	1	0	2	1	1	0	0	2	3	3	0	1	1	0	18	0	1919	A5D7D1	A5D7D1	605	622	yes	yes	2	5.3142e-208	201.9	matching	matching	matching	matching	matching	matching	matching	matching
LSIEDFTAYGGVFGNK	VLLFLQDKLSIEDFTA	YGGVFGNKQDSAFSNL	K	L	S	N	K	Q	1	0	1	1	0	0	1	3	0	1	1	1	0	2	0	1	1	0	1	1	0	16	0	1716.84	P40682	P40682	94	109	yes	yes	2	0.00040097	110.97	matching	matching	matching	matching	matching	matching	MS/MS	matching
LSILYPATTGR	FGPDKKLKLSILYPAT	LYPATTGRNFDEILRV	K	L	S	G	R	N	1	1	0	0	0	0	0	1	0	1	2	0	0	0	1	1	2	0	1	0	0	11	0	1190.67	O77834	O77834	145	155	yes	yes	2	0.038859	72.531	matching	matching	matching	matching	matching	matching	matching	matching
LSISETYDLK	SANLHLPKLSISETYD	ISETYDLKSVLGDVGI	K	L	S	L	K	S	0	0	0	1	0	0	1	0	0	1	2	1	0	0	0	2	1	0	1	0	0	10	0	1167.6	P34955;CON__P34955	P34955	313	322	yes	no	2	1.1631e-98	194.12	matching	MS/MS	matching	MS/MS	MS/MS	matching	MS/MS	MS/MS
LSKIKELMDSR	DSPATQKKLSKIKELM	IKELMDSREIGASRLS	K	L	S	S	R	E	0	1	0	1	0	0	1	0	0	1	2	2	1	0	0	2	0	0	0	0	0	11	2	1318.73	G3MYH3;F1MGT1	G3MYH3	2822	2832	yes	no	3	0.036859	56.043	matching	matching	matching	matching	matching	matching	matching	matching
LSLDTMKRR	DSLQKATRLSLDTMKR	SLDTMKRRIFVARQVE	R	L	S	R	R	I	0	2	0	1	0	0	0	0	0	0	2	1	1	0	0	1	1	0	0	0	0	9	2	1118.62	G3N309;E1B9R5	G3N309	971	979	yes	no	2	0.026873	68.224	matching	matching	matching	matching	matching	matching	matching	matching
LSLPETGELDSTTLNAMR	ALLRFQRRLSLPETGE	STTLNAMRAPRCGVPD	R	L	S	M	R	A	1	1	1	1	0	0	2	1	0	0	4	0	1	0	1	2	3	0	0	0	0	18	0	1946.96	P52176;F1MF56	P52176	78	95	yes	no	2	1.2155e-10	124.84	matching	matching	matching	MS/MS	matching	matching	matching	matching
LSNRPAFMPSEGR	NTLQTKLRLSNRPAFM	AFMPSEGRMVSDINNA	R	L	S	G	R	M	1	2	1	0	0	0	1	1	0	0	1	0	1	1	2	2	0	0	0	0	0	13	1	1460.72	Q3B7N2	Q3B7N2	347	359	yes	yes	3	0.02012	69.815	matching	matching	matching	matching	matching	matching	matching	matching
LSPDDADFVDVLHTFTR	EYAEAPSRLSPDDADF	DVLHTFTRGSPGRSIG	R	L	S	T	R	G	1	1	0	4	0	0	0	0	1	0	2	0	0	2	1	1	2	0	0	2	0	17	0	1946.94	P11151	P11151	201	217	yes	yes	3	0.040418	43.05	matching	matching	matching	matching	matching	matching	matching	matching
LSPEELLLR	ESLEDLMKLSPEELLL	SPEELLLRWANYHLEN	K	L	S	L	R	W	0	1	0	0	0	0	2	0	0	0	4	0	0	0	1	1	0	0	0	0	0	9	0	1068.62	F1MYX5;A7E3Q8;F1MSB7	F1MYX5	264	272	no	no	2	8.4684e-09	134.23	matching	matching	matching	matching	matching	MS/MS	matching	matching
LSPITSDPTEAAAVGAVEASFK	QLFEELRRLSPITSDP	GAVEASFKCCSGAIIV	R	L	S	F	K	C	5	0	0	1	0	0	2	1	0	1	1	1	0	1	2	3	2	0	0	2	0	22	0	2160.09	A5D984	A5D984	401	422	yes	yes	2;3	3.1842e-76	174.26	matching	matching	matching	matching	matching	MS/MS	matching	matching
LSPLAQELR	KVQELQDKLSPLAQEL	SPLAQELRDRARAHVE	K	L	S	L	R	D	1	1	0	0	0	1	1	0	0	0	3	0	0	0	1	1	0	0	0	0	0	9	0	1025.59	P15497;CON__P15497	P15497	164	172	yes	no	2	1.0435e-46	166.66	MS/MS	MS/MS	MS/MS	MS/MS	MS/MS	MS/MS	MS/MS	MS/MS
LSQEFHSLEDK	IESQENSKLSQEFHSL	EFHSLEDKLDLDHKSE	K	L	S	D	K	L	0	0	0	1	0	1	2	0	1	0	2	1	0	1	0	2	0	0	0	0	0	11	0	1331.64	CON__P31096;F1MI46;P31096;P31098	CON__P31096	223	233	yes	no	2	5.5602e-126	188.15	matching	MS/MS	MS/MS	matching	matching	matching	MS/MS	MS/MS
LSQEFHSLEDKLDLDHK	IESQENSKLSQEFHSL	DKLDLDHKSEEDKHLK	K	L	S	H	K	S	0	0	0	3	0	1	2	0	2	0	4	2	0	1	0	2	0	0	0	0	0	17	1	2053.01	CON__P31096;F1MI46;P31096;P31098	CON__P31096	223	239	yes	no	2;3;4	0	253.36	matching	MS/MS	matching	MS/MS	MS/MS	MS/MS	MS/MS	MS/MS
LSQEFHSLEDKLDLDHKSEEDK	IESQENSKLSQEFHSL	DHKSEEDKHLKIRISH	K	L	S	D	K	H	0	0	0	4	0	1	4	0	2	0	4	3	0	1	0	3	0	0	0	0	0	22	2	2641.25	CON__P31096;F1MI46;P31096;P31098	CON__P31096	223	244	yes	no	3;4;5	1.4303e-134	177.29	matching	MS/MS	matching	matching	matching	MS/MS	matching	matching
LSSEESSSGSSHAVMDISLPTGVNANPEDLK	IVACASYKLSSEESSS	NANPEDLKALVEQVDQ	K	L	S	L	K	A	2	0	2	2	0	0	3	2	1	1	3	1	1	0	2	8	1	0	0	2	0	31	0	3157.47	F1MY85;CON__Q1A7A4	F1MY85	1408	1438	no	no	3	0.0023991	60.814	matching	matching	matching	matching	matching	matching	matching	matching
LSSEMNTSTVNSAR	HAKLENARLSSEMNTS	TSTVNSAREELMESRM	R	L	S	A	R	E	1	1	2	0	0	0	1	0	0	0	1	0	1	0	0	4	2	0	0	1	0	14	0	1495.69	E1B8N6	E1B8N6	277	290	yes	yes	2	0.033159	72.209	matching	matching	matching	matching	matching	matching	matching	matching
LSSPATLNSR	DNDIMLIKLSSPATLN	SPATLNSRVATVSLPR	K	L	S	S	R	V	1	1	1	0	0	0	0	0	0	0	2	0	0	0	1	3	1	0	0	0	0	10	0	1044.56	CON__P00761	CON__P00761	98	107	yes	yes	2	0.028331	115.29	matching	matching	matching	matching	matching	matching	matching	matching
LSSTWEGIQAGK	SKERILIKLSSTWEGI	WEGIQAGKELEEHHGI	K	L	S	G	K	E	1	0	0	0	0	1	1	2	0	1	1	1	0	0	0	2	1	1	0	0	0	12	0	1275.65	G5E5C8;Q2TBL6;Q58DR3	G5E5C8	143	154	yes	no	2	8.6941e-48	160.56	matching	matching	matching	matching	matching	matching	matching	matching
LSYEGELTK	VLTIPKLKLSYEGELT	SYEGELTKSVQELKLQ	K	L	S	T	K	S	0	0	0	0	0	0	2	1	0	0	2	1	0	0	0	1	1	0	1	0	0	9	0	1038.52	Q95121;CON__Q95121	Q95121	317	325	yes	no	2	0.039299	72.243	matching	matching	matching	matching	matching	matching	matching	matching
LTDASWYTVVFDDGDEK	YQEAVINKLTDASWYT	VFDDGDEKTLRRSSLC	K	L	T	E	K	T	1	0	0	4	0	0	1	1	0	0	1	1	0	1	0	1	2	1	1	2	0	17	0	1959.87	F1MNB5	F1MNB5	83	99	yes	yes	2	0.033597	62.077	matching	matching	matching	matching	matching	matching	MS/MS	matching
LTISPDYAYGATGHPGIIPPNATLIFDVELLK	MSVGQRAKLTISPDYA	IFDVELLKLE______	K	L	T	L	K	L	3	0	1	2	0	0	1	3	1	4	4	1	0	1	4	1	3	0	2	1	0	32	0	3395.8	P18203	P18203	75	106	yes	yes	3	1.0054e-07	67.911	matching	matching	matching	matching	matching	matching	MS/MS	matching
LTPEMLTR	KMQDLEAKLTPEMLTR	LTPEMLTRWRNSLQPR	K	L	T	T	R	W	0	1	0	0	0	0	1	0	0	0	2	0	1	0	1	0	2	0	0	0	0	8	0	959.511	Q3ZEJ6;CON__A2I7N0;A2I7N0	Q3ZEJ6	284	291	no	no	2	0.040098	65.252	matching	matching	matching	matching	matching	matching	matching	matching
LTPYADQLQTK	RVEELKGRLTPYADQL	YADQLQTKIEENVEEL	R	L	T	T	K	I	1	0	0	1	0	2	0	0	0	0	2	1	0	0	1	0	2	0	1	0	0	11	0	1276.67	Q32PJ2;F1N3Q7;CON__Q32PJ2	Q32PJ2	201	211	yes	no	2	8.6742e-13	147.33	matching	matching	matching	MS/MS	matching	matching	MS/MS	MS/MS
LTVASHEEMHNTAPPGPGHR	EFIMLVARLTVASHEE	APPGPGHRHGPGYGKG	R	L	T	H	R	H	2	1	1	0	0	0	2	2	3	0	1	0	1	0	3	1	2	0	0	1	0	20	0	2137.01	E1BLI9;F1MHS5	E1BLI9	86	105	yes	no	3;4	5.2916e-07	106.19	matching	matching	matching	matching	matching	matching	matching	matching
LTVASHEEMHNTAPPGQGHR	EFIMLVARLTVASHEE	APPGQGHRHGPGYGKG	R	L	T	H	R	H	2	1	1	0	0	1	2	2	3	0	1	0	1	0	2	1	2	0	0	1	0	20	0	2168.02	P28783	P28783	86	105	yes	yes	3;4;5	0.00023255	96.773	matching	matching	matching	matching	matching	MS/MS	matching	matching
LTYAYFIGGDAGDAFDGYDFGDDSSDK	TGENDKYRLTYAYFIG	FGDDSSDKFFTSHNGM	R	L	T	D	K	F	3	0	0	7	0	0	0	5	0	1	1	1	0	3	0	2	1	0	3	0	0	27	0	2881.19	Q3SZZ9;F1MGU7;P12799	Q3SZZ9	300	326	yes	no	2;3	2.7462e-163	178.35	matching	MS/MS	matching	matching	MS/MS	MS/MS	MS/MS	matching
LVAYYTLINAK	SDFIPSFRLVAYYTLI	YYTLINAKGQREVVAD	R	L	V	A	K	G	2	0	1	0	0	0	0	0	0	1	2	1	0	0	0	0	1	0	2	1	0	11	0	1267.72	Q2UVX4;CON__Q2UVX4;G3X7A5	Q2UVX4	529	539	yes	no	2	2.7872e-41	175.49	matching	matching	matching	matching	matching	MS/MS	MS/MS	matching
LVDTFLEDVK	LFINESAKLVDTFLED	DTFLEDVKNLYHSEAF	K	L	V	V	K	N	0	0	0	2	0	0	1	0	0	0	2	1	0	1	0	0	1	0	0	2	0	10	0	1177.62	P34955;CON__P34955	P34955	148	157	yes	no	2	9.9276e-123	190.86	matching	matching	matching	matching	MS/MS	MS/MS	MS/MS	matching
LVEWIVMQCGPDVGRPDR	YDEELEERLVEWIVMQ	PDVGRPDRGRLGFQVW	R	L	V	D	R	G	0	2	0	2	1	1	1	2	0	1	1	0	1	0	2	0	0	1	0	3	0	18	1	2126.04	Q9TS87	Q9TS87	30	47	yes	yes	2	0.002487	90.259	MS/MS	matching	matching	matching	matching	matching	matching	matching
LVIIEGDLER	KYEEVARKLVIIEGDL	IIEGDLERTEERAELA	K	L	V	E	R	T	0	1	0	1	0	0	2	1	0	2	2	0	0	0	0	0	0	0	0	1	0	10	0	1155.65	F1MV90;Q5KR47	F1MV90	133	142	no	no	2	0.0001859	119.27	matching	matching	matching	matching	matching	matching	matching	matching
LVLVNAIYFK	GMVDSLTKLVLVNAIY	LVNAIYFKGKWQEKFM	K	L	V	F	K	G	1	0	1	0	0	0	0	0	0	1	2	1	0	1	0	0	0	0	1	2	0	10	0	1178.71	Q1JPB0;G1K1L8;Q5BIR5;O02739;F1N2A2;A6QPW6	Q1JPB0	158	167	no	no	2	1.4707e-71	174.41	matching	matching	matching	matching	matching	matching	matching	matching
LVMGIPTFGR	RLGAPANKLVMGIPTF	MGIPTFGRSYTLASSK	K	L	V	G	R	S	0	1	0	0	0	0	0	2	0	1	1	0	1	1	1	0	1	0	0	1	0	10	0	1089.6	G3X7D2;P30922	G3X7D2	262	271	yes	no	2	0.00042108	115.78	matching	matching	matching	matching	matching	MS/MS	matching	matching
LVNELTEFAK	CPFDEHVKLVNELTEF	NELTEFAKTCVADESH	K	L	V	A	K	T	1	0	1	0	0	0	2	0	0	0	2	1	0	1	0	0	1	0	0	1	0	10	0	1162.62	P02769;CON__P02769	P02769	66	75	yes	no	2	5.9404e-167	201.09	MS/MS	MS/MS	MS/MS	MS/MS	MS/MS	MS/MS	MS/MS	MS/MS
LVPFATELHER	YTDDLQKKLVPFATEL	FATELHERLTKDSEKL	K	L	V	E	R	L	1	1	0	0	0	0	2	0	1	0	2	0	0	1	1	0	1	0	0	1	0	11	0	1310.7	Q32PJ2;F1N3Q7;CON__Q32PJ2	Q32PJ2	80	90	yes	no	2	0.015099	89.805	matching	matching	matching	matching	matching	matching	matching	matching
LVPLLDIGDIIIDGGNSEYR	AVDDFIEKLVPLLDIG	DGGNSEYRDTMRRCRD	K	L	V	Y	R	D	0	1	1	3	0	0	1	3	0	4	3	0	0	0	1	1	0	0	1	1	0	20	0	2171.15	Q3ZCI4	Q3ZCI4	88	107	yes	yes	2;3	2.5254e-250	207.81	matching	matching	matching	matching	matching	MS/MS	matching	matching
LVQAFQFTDK	RSVDETLRLVQAFQFT	QAFQFTDKHGEVCPAG	R	L	V	D	K	H	1	0	0	1	0	2	0	0	0	0	1	1	0	2	0	0	1	0	0	1	0	10	0	1195.62	Q5E947	Q5E947	159	168	yes	yes	2	3.1229e-05	131.12	matching	matching	matching	matching	matching	matching	matching	matching
LVSDEMVLELIEK	KATMDAGKLVSDEMVL	MVLELIEKNLETPPCK	K	L	V	E	K	N	0	0	0	1	0	0	3	0	0	1	3	1	1	0	0	1	0	0	0	2	0	13	0	1516.81	P08166	P08166	75	87	yes	yes	2	4.3475e-10	138.21	matching	matching	matching	matching	matching	matching	matching	matching
LVSHLTAQLSELK	DKLSATMKLVSHLTAQ	TAQLSELKEQMTEQRK	K	L	V	L	K	E	1	0	0	0	0	1	1	0	1	0	4	1	0	0	0	2	1	0	0	1	0	13	0	1437.82	Q8WN95;E1BKE7	Q8WN95	2628	2640	yes	no	3	0.01911	77.74	matching	matching	matching	matching	matching	matching	matching	matching
LVSIGAEEIVDGNVK	FIASKGVKLVSIGAEE	EIVDGNVKMTLGMIWT	K	L	V	V	K	M	1	0	1	1	0	0	2	2	0	2	1	1	0	0	0	1	0	0	0	3	0	15	0	1541.83	Q3B7N2;Q3ZC55;F1MRD4	Q3B7N2	107	121	yes	no	2	2.1251e-08	136.57	matching	matching	matching	matching	matching	matching	matching	matching
LVSSENFDDYMK	DAFVGTWKLVSSENFD	ENFDDYMKEVGVGFAT	K	L	V	M	K	E	0	0	1	2	0	0	1	0	0	0	1	1	1	1	0	2	0	0	1	1	0	12	0	1446.63	P48035;F1MHQ4	P48035	11	22	yes	no	2	0.0009578	137.95	matching	matching	matching	matching	matching	matching	matching	matching
LVTLDEFLK	EVDTNKDRLVTLDEFL	VTLDEFLKATEKKEFL	R	L	V	L	K	A	0	0	0	1	0	0	1	0	0	0	3	1	0	1	0	0	1	0	0	1	0	9	0	1076.61	Q0IIH5	Q0IIH5	312	320	yes	yes	2	7.8997e-06	126.07	matching	matching	matching	matching	matching	MS/MS	MS/MS	matching
LVTLEEFLASTQR	NVDTNQDRLVTLEEFL	EFLASTQRKEFGDTGE	R	L	V	Q	R	K	1	1	0	0	0	1	2	0	0	0	3	0	0	1	0	1	2	0	0	1	0	13	0	1505.81	Q0P569	Q0P569	308	320	yes	yes	2;3	0	251.91	MS/MS	MS/MS	MS/MS	matching	MS/MS	MS/MS	MS/MS	MS/MS
LVVGNTEIGIEMK	KAQHPEAKLVVGNTEI	TEIGIEMKFKNQLFPM	K	L	V	M	K	F	0	0	1	0	0	0	2	2	0	2	1	1	1	0	0	0	1	0	0	2	0	13	0	1401.75	P80457;F1MUT3	P80457	257	269	yes	no	2	6.2198e-78	187.11	matching	MS/MS	matching	matching	matching	matching	MS/MS	matching
LVVSSVQHQSALELSEAGVQAAAATSTAMSR	LRGISDERLVVSSVQH	ATSTAMSRMSLSSFIV	R	L	V	S	R	M	7	1	0	0	0	3	2	1	1	0	3	0	1	0	0	6	2	0	0	4	0	31	0	3098.57	P28800;CON__P28800	P28800	374	404	yes	no	3	8.4063e-11	76.967	matching	matching	MS/MS	MS/MS	matching	MS/MS	matching	matching
LVVSTQTALA	CFAVEGPKLVVSTQTA	VSTQTALA________	K	L	V	L	A	-	2	0	0	0	0	1	0	0	0	0	2	0	0	0	0	1	2	0	0	2	0	10	0	1001.58	P02769;CON__P02769	P02769	598	607	yes	no	2	8.5353e-97	167.12	MS/MS	MS/MS	MS/MS	MS/MS	MS/MS	MS/MS	MS/MS	MS/MS
LYDDRNEPVLR	TDSFSHRRLYDDRNEP	DRNEPVLRLDNAPEPY	R	L	Y	L	R	L	0	2	1	2	0	0	1	0	0	0	2	0	0	0	1	0	0	0	1	1	0	11	1	1388.7	Q8MI01;E1BGW1	Q8MI01	270	280	yes	no	3	0.023287	70.552	matching	matching	matching	matching	matching	matching	matching	MS/MS
LYDQLLQSYQQK	QLAEKFSRLYDQLLQS	LLQSYQQKMLNTSALL	R	L	Y	Q	K	M	0	0	0	1	0	4	0	0	0	0	3	1	0	0	0	1	0	0	2	0	0	12	0	1525.78	P17697;CON__P17697	P17697	332	343	yes	no	2	0	262.11	matching	MS/MS	matching	matching	MS/MS	MS/MS	matching	matching
LYGEVMSPLFPKPYPNNFER	GATPTPQKLYGEVMSP	PYPNNFERTTVITVPT	K	L	Y	E	R	T	0	1	2	0	0	0	2	1	0	0	2	1	1	2	4	1	0	0	2	1	0	20	1	2397.18	A5D9E9;Q3SYT3	A5D9E9	25	44	yes	no	3	0.0089741	59.502	matching	matching	matching	matching	matching	matching	matching	matching
LYKELPDPQESIQR	GWNIPMGKLYKELPDP	DPQESIQRAAANFFSA	K	L	Y	Q	R	A	0	1	0	1	0	2	2	0	0	1	2	1	0	0	2	1	0	0	1	0	0	14	1	1714.89	G3X6N3;CON__Q0IIK2;CON__Q29443;Q29443	G3X6N3	153	166	yes	no	3	3.8131e-95	177.21	matching	matching	matching	matching	matching	MS/MS	matching	matching
LYNQLLQSYQQK	QLAEKFSRLYNQLLQS	LLQSYQQKLLNTSALL	R	L	Y	Q	K	L	0	0	1	0	0	4	0	0	0	0	3	1	0	0	0	1	0	0	2	0	0	12	0	1524.79	F1MWI1	F1MWI1	280	291	yes	yes	2;3	2.6319e-181	219.74	MS/MS	MS/MS	matching	matching	matching	matching	matching	matching
LYNVEATSYALLALLAR	RWEEPNQKLYNVEATS	ALLALLARKDYDTTPP	K	L	Y	A	R	K	4	1	1	0	0	0	1	0	0	0	5	0	0	0	0	1	1	0	2	1	0	17	0	1880.04	Q2UVX4;CON__Q2UVX4;G3X7A5	Q2UVX4	1226	1242	yes	no	2;3	0	284.24	matching	MS/MS	matching	MS/MS	MS/MS	MS/MS	matching	matching
LYQDFSVLK	ALTDFSLRLYQDFSVL	YQDFSVLKKRETNFIF	R	L	Y	L	K	K	0	0	0	1	0	1	0	0	0	0	2	1	0	1	0	1	0	0	1	1	0	9	0	1111.59	P50448;CON__P50448;E1BMJ0	P50448	127	135	no	no	2	2.0788e-12	157.75	MS/MS	MS/MS	matching	MS/MS	MS/MS	matching	MS/MS	MS/MS
LYQGAGGPGAGGFGAQGPK	VCNPIISRLYQGAGGP	GFGAQGPKGGSGSGPT	R	L	Y	P	K	G	3	0	0	0	0	2	0	8	0	0	1	1	0	1	2	0	0	0	1	0	0	19	0	1688.83	Q27975;Q27965	Q27975	610	628	yes	no	2	1.8494e-17	148.41	matching	matching	matching	matching	matching	MS/MS	matching	matching
LYVGKNQLVEVEK	KDITPTLRLYVGKNQL	NQLVEVEKVVLHPDHS	R	L	Y	E	K	V	0	0	1	0	0	1	2	1	0	0	2	2	0	0	0	0	0	0	1	3	0	13	1	1517.85	Q2TBU0;G3X6K8	Q2TBU0	218	230	yes	no	2;3	1.2656e-111	181.76	matching	matching	matching	matching	matching	matching	matching	matching
MAEAEGESLESWLNK	________________	SLESWLNKATNPSNRQ	-	M	A	N	K	A	2	0	1	0	0	0	4	1	0	0	2	1	1	0	0	2	0	1	0	0	0	15	0	1692.77	G5E690	G5E690	1	15	yes	yes	2	0.0022746	83.243	matching	matching	matching	matching	matching	matching	matching	matching
MALDIEIATYR	YQDLLNVKMALDIEIA	DIEIATYRKLLEGEES	K	M	A	Y	R	K	2	1	0	1	0	0	1	0	0	2	1	0	1	0	0	0	1	0	1	0	0	11	0	1294.66	P48616;A6QQJ3	P48616	391	401	yes	no	2	0.00038293	128.08	matching	matching	matching	matching	matching	MS/MS	matching	matching
MALENGGLAR	VSYAFLEKMALENGGL	LENGGLARRIYEDSDS	K	M	A	A	R	R	2	1	1	0	0	0	1	2	0	0	2	0	1	0	0	0	0	0	0	0	0	10	0	1030.52	F1MMD7;Q3T052;CON__Q3T052	F1MMD7	430	439	yes	no	2	0.00010144	133.91	matching	matching	matching	matching	matching	MS/MS	matching	matching
MAPSRNGMILK	________________	SRNGMILKPHFHKDWQ	-	M	A	L	K	P	1	1	1	0	0	0	0	1	0	1	1	1	2	0	1	1	0	0	0	0	0	11	1	1216.64	Q56JZ1;F1MK30	Q56JZ1	1	11	yes	no	2	0.017296	74.841	matching	matching	matching	matching	matching	matching	matching	matching
MAPYQGPDAVPGALDYK	QAEYCIARMAPYQGPD	VPGALDYKSFSTALYG	R	M	A	Y	K	S	3	0	0	2	0	1	0	2	0	0	1	1	1	0	3	0	0	0	2	1	0	17	0	1791.85	A5D7D1	A5D7D1	883	899	yes	yes	2	0.00029588	122.29	matching	matching	matching	matching	matching	matching	matching	matching
MATLNANVQVAR	VVVLQLNRMATLNANV	NANVQVARLPAQDQGV	R	M	A	A	R	L	3	1	2	0	0	1	0	0	0	0	1	0	1	0	0	0	1	0	0	2	0	12	0	1286.68	A6QPP7;G3MWP1	A6QPP7	126	137	yes	no	2	1.4181e-150	196.67	matching	matching	matching	matching	matching	MS/MS	matching	matching
MAVDAAVDGVVIR	NPKGGKKRMAVDAAVD	AVDGVVIRSLKVNCKV	R	M	A	I	R	S	3	1	0	2	0	0	0	1	0	1	0	0	1	0	0	0	0	0	0	4	0	13	0	1314.7	Q0VCM5;F1MMP5;CON__Q0VCM5	Q0VCM5	37	49	yes	no	2	7.9977e-39	160.18	matching	MS/MS	matching	MS/MS	MS/MS	matching	matching	matching
MAVEEEGLRVFQSVK	________________	LRVFQSVKIKIGEAKN	-	M	A	V	K	I	1	1	0	0	0	1	3	1	0	0	1	1	1	1	0	1	0	0	0	3	0	15	1	1720.88	Q28013;A5D7I7	Q28013	1	15	yes	no	2	0.0067707	73.877	matching	matching	matching	matching	matching	matching	matching	matching
MDAQQEPNIQLDHLNLLK	LRMLLKAKMDAQQEPN	LDHLNLLKQFEHLDPQ	K	M	D	L	K	Q	1	0	2	2	0	3	1	0	1	1	4	1	1	0	1	0	0	0	0	0	0	18	0	2119.07	Q0P569	Q0P569	116	133	yes	yes	3	5.0717e-33	140.77	matching	matching	matching	matching	matching	matching	MS/MS	matching
MDDREDLVYQAK	________________	EDLVYQAKLAEQAERY	-	M	D	A	K	L	1	1	0	3	0	1	1	0	0	0	1	1	1	0	0	0	0	0	1	1	0	12	1	1481.68	P62261	P62261	1	12	yes	yes	2	0.0057478	88.021	matching	matching	matching	matching	matching	matching	matching	matching
MDEIWLK	PPEKWQEKMDEIWLKD	KMDEIWLKDDSTDWPL	K	M	D	L	K	D	0	0	0	1	0	0	1	0	0	1	1	1	1	0	0	0	0	1	0	0	0	7	0	933.463	A5D791	A5D791	670	676	yes	yes	2	0.015737	77.748	matching	matching	matching	matching	matching	matching	matching	MS/MS
MDEMATTQISK	________________	MATTQISKDELDELKE	-	M	D	S	K	D	1	0	0	1	0	1	1	0	0	1	0	1	2	0	0	1	2	0	0	0	0	11	0	1253.56	A7E3Q8;F1MSB7	A7E3Q8	1	11	yes	no	2	0.033176	49.466	matching	matching	matching	matching	matching	matching	matching	matching
MDFELYLGYEYVTALQNLR	GFLKIPSKMDFELYLG	VTALQNLRESKPPDSS	K	M	D	L	R	E	1	1	1	1	0	1	2	1	0	0	4	0	1	1	0	0	1	0	3	1	0	19	0	2337.14	G3X6N3;CON__Q0IIK2;CON__Q29443;Q29443	G3X6N3	332	350	yes	no	2;3	0	205.12	matching	MS/MS	MS/MS	MS/MS	MS/MS	MS/MS	MS/MS	MS/MS
MDKNELVQK	________________	DKNELVQKAKLAEQAE	-	M	D	Q	K	A	0	0	1	1	0	1	1	0	0	0	1	2	1	0	0	0	0	0	0	1	0	9	1	1103.56	P63103	P63103	1	9	yes	yes	2	0.0079582	94.692	matching	matching	matching	matching	matching	matching	matching	matching
MDNPDTFYSLK	YRITEVARMDNPDTFY	PDTFYSLKYQIKEGDC	R	M	D	L	K	Y	0	0	1	2	0	0	0	0	0	0	1	1	1	1	1	1	1	0	1	0	0	11	0	1329.59	P01045;CON__P01045-1;P01044;CON__P01044-1;F1MNV5;CON__Q2KJ62	CON__Q2KJ62	64	74	no	no	2	1.4638e-214	214.04	MS/MS	matching	MS/MS	matching	MS/MS	matching	MS/MS	matching
MEDEAESLEDLGFK	AIESKHFKMEDEAESL	SLEDLGFKGAHGTQKG	K	M	E	F	K	G	1	0	0	2	0	0	4	1	0	0	2	1	1	1	0	1	0	0	0	0	0	14	0	1611.7	P02672;CON__P02672;A5PJE3	P02672	572	585	yes	no	2	0	214.61	matching	matching	MS/MS	MS/MS	matching	matching	matching	matching
MEDEVKNLTLQLEQESNK	HLIENKDRMEDEVKNL	QLEQESNKRLLLQNEL	R	M	E	N	K	R	0	0	2	1	0	2	4	0	0	0	3	2	1	0	0	1	1	0	0	1	0	18	1	2147.04	Q8MIT6;F1MF50	Q8MIT6	172	189	yes	no	3	0.040996	62.104	matching	matching	matching	matching	matching	matching	matching	matching
MEEEQRQRQEEPPPGPQR	FLELFKRKMEEEQRQR	EPPPGPQRPDQPATAA	K	M	E	Q	R	P	0	3	0	0	0	4	5	1	0	0	0	0	1	0	4	0	0	0	0	0	0	18	2	2220.03	F1MHW3	F1MHW3	75	92	yes	yes	2	7.3111e-05	87.824	matching	matching	matching	matching	matching	matching	matching	matching
MELQEIQLK	QALKDEEKMELQEIQL	ELQEIQLKEAKHIAEE	K	M	E	L	K	E	0	0	0	0	0	2	2	0	0	1	2	1	1	0	0	0	0	0	0	0	0	9	0	1130.6	F1MV90;Q5KR47	F1MV90	105	113	no	no	2	4.2945e-70	194.94	matching	matching	matching	matching	matching	MS/MS	matching	matching
MENALDQLK	GSPVKRQRMENALDQL	ENALDQLKQFTTVVAD	R	M	E	L	K	Q	1	0	1	1	0	1	1	0	0	0	2	1	1	0	0	0	0	0	0	0	0	9	0	1060.52	G5E5C8;Q2TBL6;Q58DR3	G5E5C8	11	19	yes	no	2	0.029653	88.056	matching	matching	matching	matching	matching	matching	matching	matching
MEPSTCASTGSVQWNK	CHVCCMKKMEPSTCAS	TGSVQWNKYFLGRTIT	K	M	E	N	K	Y	1	0	1	0	1	1	1	1	0	0	0	1	1	0	1	3	2	1	0	1	0	16	0	1781.77	Q10741	Q10741	602	617	yes	yes	2	0.00071984	103.76	matching	matching	matching	matching	matching	MS/MS	matching	matching
MEQLSAANTR	________________	QLSAANTRFAVDLFLT	-	M	E	T	R	F	2	1	1	0	0	1	1	0	0	0	1	0	1	0	0	1	1	0	0	0	0	10	0	1119.53	Q1JPB0;G1K1L8	Q1JPB0	1	10	yes	no	2	2.5368e-11	162.49	matching	matching	matching	MS/MS	matching	matching	matching	matching
METAGVTSAEIQK	ILVLNREKMETAGVTS	VTSAEIQKCFGVSLGI	K	M	E	Q	K	C	2	0	0	0	0	1	2	1	0	1	0	1	1	0	0	1	2	0	0	1	0	13	0	1363.67	F1MX87	F1MX87	365	377	yes	yes	2	3.3311e-19	145	matching	matching	matching	matching	matching	matching	matching	matching
MFDKWQAESNDMENEK	PKEGIFKKMFDKWQAE	SNDMENEKCKLLMIAE	K	M	F	E	K	C	1	0	2	2	0	1	3	0	0	0	0	2	2	1	0	1	0	1	0	0	0	16	1	2000.82	F1MB15;E1BH49	F1MB15	2839	2854	yes	no	2	0.0037129	84.753	matching	matching	matching	matching	matching	matching	matching	matching
MFREIR	GVTKPLRKMFREIRPN	RKMFREIRPNSTVQWE	K	M	F	I	R	P	0	2	0	0	0	0	1	0	0	1	0	0	1	1	0	0	0	0	0	0	0	6	1	850.448	F1MW44	F1MW44	680	685	yes	yes	2	0.039582	16.107	matching	matching	matching	matching	matching	matching	matching	matching
MFTTAPDQVDKENEDFQESNK	LLLDDNIKMFTTAPDQ	EDFQESNKMHSMNGFM	K	M	F	N	K	M	1	0	2	3	0	2	3	0	0	0	0	2	1	2	1	1	2	0	0	1	0	21	1	2472.08	F1N076;CON__ENSEMBL:ENSBTAP00000031900	F1N076	594	614	no	no	2;3	1.3408e-22	135.79	matching	MS/MS	MS/MS	MS/MS	MS/MS	matching	MS/MS	MS/MS
MGEFPWQMAIK	VVGGKPAKMGEFPWQM	FPWQMAIKEGDKIHCG	K	M	G	I	K	E	1	0	0	0	0	1	1	1	0	1	0	1	2	1	1	0	0	1	0	0	0	11	0	1336.63	F1N4M7;CON__Q32PI4	F1N4M7	384	394	yes	no	2	3.5694e-24	150.09	matching	matching	matching	matching	matching	matching	matching	matching
MHVSYQETQQMQMKFQQVR	EHNVFQNKMHVSYQET	QMKFQQVREQMEAEIA	K	M	H	V	R	E	0	1	0	0	0	6	1	0	1	0	0	1	3	1	0	1	1	0	1	2	0	19	1	2426.13	F1MLU7	F1MLU7	394	412	yes	yes	3	0.0011115	85.576	MS/MS	MS/MS	MS/MS	matching	matching	matching	MS/MS	MS/MS
MIALSIDSVEDHLAWSK	EFAKRNVKMIALSIDS	EDHLAWSKDINAYNGE	K	M	I	S	K	D	2	0	0	2	0	0	1	0	1	2	2	1	1	0	0	3	0	1	0	1	0	17	0	1913.96	O77834	O77834	68	84	yes	yes	3	0.0068601	67.102	matching	matching	matching	matching	matching	matching	matching	matching
MILNGNPSRNRR				M	I	R	R		0	3	3	0	0	0	0	1	0	1	1	0	1	0	1	1	0	0	0	0	0	12	2	1426.76		REV__F1MC39			yes	yes	2	0.043398	53.211	matching	matching	matching	matching	matching	matching	matching	matching
MIMMEERMQLQQHRVMALQEEQESQK	ELETAKTKMIMMEERM	QEEQESQKHEFEKQIM	K	M	I	Q	K	H	1	2	0	0	0	6	5	0	1	1	2	1	5	0	0	1	0	0	0	1	0	26	2	3260.52	F1MP58	F1MP58	847	872	yes	yes	3	0.010438	48.597	matching	matching	matching	matching	matching	matching	MS/MS	matching
MINLSVPDTIDER	GDGIVLCKMINLSVPD	VPDTIDERTINKKKLT	K	M	I	E	R	T	0	1	1	2	0	0	1	0	0	2	1	0	1	0	1	1	1	0	0	1	0	13	0	1501.74	F1MYX5;A7E3Q8;F1MSB7	F1MYX5	166	178	no	no	2	1.7061e-26	150.22	matching	matching	matching	matching	matching	matching	matching	matching
MINSWVESQTNGK	NAAEESRKMINSWVES	VESQTNGKIKELFPED	K	M	I	G	K	I	0	0	2	0	0	1	1	1	0	1	0	1	1	0	0	2	1	1	0	1	0	13	0	1492.7	E1B8B5;A6QPZ4;G5E537	A6QPZ4	94	106	no	no	2	0	279.65	matching	matching	matching	matching	matching	MS/MS	matching	matching
MKNKLNK	________________	________________	-	M	K	N	K	N	0	0	2	0	0	0	0	0	0	0	1	3	1	0	0	0	0	0	0	0	0	7	2	874.506	F1ME33	F1ME33	1	7	yes	yes	2	0.0027666	88.643	matching	matching	matching	matching	matching	matching	matching	matching
MLDAEDIVNTARPDEK	EKYLDIPKMLDAEDIV	NTARPDEKAIMTYVSS	K	M	L	E	K	A	2	1	1	3	0	0	2	0	0	1	1	1	1	0	1	0	1	0	0	1	0	16	1	1815.87	A5D7D1	A5D7D1	240	255	yes	yes	2;3	0.00046349	108.23	matching	matching	matching	matching	matching	MS/MS	matching	matching
MLFNQQELFGR	DKADFVRRMLFNQQEL	NQQELFGRNGFEYMMF	R	M	L	G	R	N	0	1	1	0	0	2	1	1	0	0	2	0	1	2	0	0	0	0	0	0	0	11	0	1381.68	E1BI82;CON__Q2HJF0	CON__Q2HJF0	544	554	no	no	2	0.00138	124.39	matching	matching	matching	matching	matching	matching	matching	matching
MLGVPVNR	KTQSFVAKMLGVPVNR	MLGVPVNRILVRVKRM	K	M	L	N	R	I	0	1	1	0	0	0	0	1	0	0	1	0	1	0	1	0	0	0	0	2	0	8	0	884.49	P80457;F1MUT3	P80457	779	786	yes	no	2	0.014172	79.116	matching	matching	matching	matching	matching	matching	MS/MS	MS/MS
MLHEPEEQPPER	SKESDFWKMLHEPEEQ	PEEQPPEREETQAEEQ	K	M	L	E	R	E	0	1	0	0	0	1	4	0	1	0	1	0	1	0	3	0	0	0	0	0	0	12	0	1490.68	F1MX65	F1MX65	314	325	yes	yes	3	0.041256	62.694	matching	matching	matching	matching	matching	matching	matching	matching
MLLEASKRPEMNTIINNTR	MGGLLVKKMLLEASKR	NTIINNTRGIIFYSVP	K	M	L	T	R	G	1	2	3	0	0	0	2	0	0	2	2	1	2	0	1	1	2	0	0	0	0	19	2	2230.16	Q2TBM9	Q2TBM9	507	525	yes	yes	2	0.0014937	88.385	matching	matching	matching	matching	matching	matching	matching	matching
MLLYTEVTR	MANGQLVKMLLYTEVT	LLYTEVTRYLDFKVVE	K	M	L	T	R	Y	0	1	0	0	0	0	1	0	0	0	2	0	1	0	0	0	2	0	1	1	0	9	0	1124.59	P21856	P21856	90	98	yes	yes	2	0.017799	86.898	matching	matching	matching	matching	matching	matching	matching	matching
MLVGTVFQK	VASVYKGKMLVGTVFQ	LVGTVFQKALYCEF__	K	M	L	Q	K	A	0	0	0	0	0	1	0	1	0	0	1	1	1	1	0	0	1	0	0	2	0	9	0	1021.56	Q2KIW1	Q2KIW1	341	349	yes	yes	2	0.02284	83.647	matching	matching	matching	matching	matching	matching	matching	matching
MMEGNDDDDIK	________________	GNDDDDIKLSEEIEAE	-	M	M	I	K	L	0	0	1	4	0	0	1	1	0	1	0	1	2	0	0	0	0	0	0	0	0	11	0	1281.49	E1B933	E1B933	1	11	yes	yes	2	0.026371	82.261	matching	matching	MS/MS	matching	matching	matching	matching	matching
MMRGNQSHITEFLLLGLTSDPK	________________	LGLTSDPKQQVWLFAS	-	M	M	P	K	Q	0	1	1	1	0	1	1	2	1	1	4	1	2	1	1	2	2	0	0	0	0	22	1	2487.26	E1BHP8	E1BHP8	1	22	yes	yes	2	0.0074652	53.453	matching	matching	matching	matching	MS/MS	matching	matching	matching
MMTAESREATGLSPQAAQEK	________________	SPQAAQEKDGIVIVKV	-	M	M	E	K	D	4	1	0	0	0	2	3	1	0	0	1	1	2	0	1	2	2	0	0	0	0	20	1	2135	E1BIL7	E1BIL7	1	20	yes	yes	2	0.003696	63.46	matching	matching	matching	matching	matching	matching	matching	matching
MNDPLPAPSQPIVFK	PKSAFAVKMNDPLPAP	PSQPIVFKEALHNDQD	K	M	N	F	K	E	1	0	1	1	0	1	0	0	0	1	1	1	1	1	4	1	0	0	0	1	0	15	0	1652.86	Q2KIU3;CON__Q2KIU3	Q2KIU3	93	107	yes	no	2	0	235.93	matching	MS/MS	MS/MS	MS/MS	MS/MS	MS/MS	matching	MS/MS
MNEFLENVKKNIHLR	TYYLKPSKMNEFLENV	VKKNIHLRTVHSELVG	K	M	N	L	R	T	0	1	3	0	0	0	2	0	1	1	2	2	1	1	0	0	0	0	0	1	0	15	2	1884	G3X6L8	G3X6L8	49	63	yes	yes	3	0.04779	55.724	matching	matching	matching	matching	matching	matching	matching	matching
MNPVVVVHGGGASNISK	________________	GGASNISKDRKERVRQ	-	M	N	S	K	D	1	0	2	0	0	0	0	3	1	1	0	1	1	0	1	2	0	0	0	4	0	17	0	1664.87	Q32LE5	Q32LE5	1	17	yes	yes	2	0.00070541	103.87	matching	matching	matching	matching	matching	matching	matching	matching
MNTLANRFPAVNSLIQRINLR	MLKSIQSKMNTLANRF	LIQRINLRKRRDSLIL	K	M	N	L	R	K	2	3	4	0	0	1	0	0	0	2	3	0	1	1	1	1	1	0	0	1	0	21	2	2440.35	G5E571;Q2TBU3	G5E571	199	219	yes	no	3	0.0049603	61.477	matching	matching	matching	matching	matching	matching	matching	matching
MPDMHVNMPK	KLKGPKLKMPDMHVNM	DMHVNMPKISMPEIDL	K	M	P	P	K	I	0	0	1	1	0	0	0	0	1	0	0	1	3	0	2	0	0	0	0	1	0	10	0	1198.53	F1MCK2	F1MCK2	2951	2960	yes	yes	2	0.034024	52.167	matching	matching	matching	matching	matching	matching	matching	matching
MPEMHFKTPKISMPDIDLNLTGPK	KWKSPKFKMPEMHFKT	DLNLTGPKIKGDVDVT	K	M	P	P	K	I	0	0	1	2	0	0	1	1	1	2	2	3	3	1	4	1	2	0	0	0	0	24	2	2739.38	F1MCK2	F1MCK2	2493	2516	yes	yes	3	0.017477	51.31	MS/MS	matching	matching	matching	matching	matching	matching	matching
MPKIKMPK	QGPDWHLKMPKIKMPK	MPKIKMPKFSMPGFKG	K	M	P	P	K	F	0	0	0	0	0	0	0	0	0	1	0	3	2	0	2	0	0	0	0	0	0	8	2	971.566	F1MCK2	F1MCK2	1512	1519	yes	no	2	0.007115	96.19	matching	matching	matching	matching	matching	matching	matching	matching
MPLPQTEASGPEPHR	________________	ASGPEPHRPQEPAEPH	-	M	P	H	R	P	1	1	0	0	0	1	2	1	1	0	1	0	1	0	4	1	1	0	0	0	0	15	0	1645.79	E1B9K5	E1B9K5	1	15	yes	yes	2	0.0036161	115.12	matching	matching	matching	matching	matching	matching	MS/MS	MS/MS
MPPKFDPNEIK	________________	KFDPNEIKVVYLRCTG	-	M	P	I	K	V	0	0	1	1	0	0	1	0	0	1	0	2	1	1	3	0	0	0	0	0	0	11	1	1314.66	P61284;G3MZG7	P61284	1	11	yes	no	2	5.1243e-07	99.815	matching	matching	matching	matching	matching	matching	matching	matching
MPTPPNYK	SVDITNIRMPTPPNYK	MPTPPNYKVGDKIATR	R	M	P	Y	K	V	0	0	1	0	0	0	0	0	0	0	0	1	1	0	3	0	1	0	1	0	0	8	0	946.458	A7E3W4;A7Z014;Q6B855	A7E3W4	276	283	yes	no	2	0.0033599	101.33	matching	matching	matching	matching	matching	matching	matching	matching
MQKEDILNNKLNDALAMLEK	QKEEMDLKMQKEDILN	DALAMLEKAQKTKIAE	K	M	Q	E	K	A	2	0	3	2	0	1	2	0	0	1	4	3	2	0	0	0	0	0	0	0	0	20	2	2330.2	F1MP58	F1MP58	795	814	yes	yes	3	0.00086138	77.899	matching	matching	matching	MS/MS	matching	matching	matching	matching
MQQNIQELEEQLEEEESAR	HLQAEKKKMQQNIQEL	LEEEESARQKLQLEKV	K	M	Q	A	R	Q	1	1	1	0	0	4	7	0	0	1	2	0	1	0	0	1	0	0	0	0	0	19	0	2332.05	F1MQ37	F1MQ37	941	959	yes	yes	2	5.5452e-05	104.35	matching	matching	matching	matching	matching	matching	matching	matching
MQVDQEEPHVEEQQQQTPAENR	QNAKEEEKMQVDQEEP	QQTPAENRVESEEMET	K	M	Q	N	R	V	1	1	1	1	0	6	5	0	1	0	0	0	1	0	2	0	1	0	0	2	0	22	0	2649.17	E1BBY7	E1BBY7	522	543	yes	yes	3	0.0018363	61.139	matching	matching	matching	matching	matching	matching	matching	matching
MRPATDILTVTVENSQGFR	RVFALDQKMRPATDIL	VENSQGFRVRKREVFA	K	M	R	F	R	V	1	2	1	1	0	1	1	1	0	1	1	0	1	1	1	1	3	0	0	2	0	19	1	2134.08	E1BH06;CON__P01030;CON__ENSEMBL:ENSBTAP00000007350	CON__ENSEMBL:ENSBTAP00000007350	167	185	no	no	3	2.533e-17	147.49	matching	matching	matching	matching	matching	MS/MS	matching	matching
MSLFYAEATPMLK	VNNELANRMSLFYAEA	AEATPMLKTLSDATTK	R	M	S	L	K	T	2	0	0	0	0	0	1	0	0	0	2	1	2	1	1	1	1	0	1	0	0	13	0	1500.74	Q2KJI3;Q17QT7	Q2KJI3	187	199	yes	no	2	0.00095495	105.03	matching	matching	matching	matching	matching	matching	matching	matching
MSQMESSIETIINIFHQYSVR	________________	IFHQYSVRLGHYDTLI	K	M	S	V	R	L	0	1	1	0	0	2	2	0	1	4	0	0	2	1	0	4	1	0	1	1	0	21	0	2512.21	E1BLI9;F1MHS5;P28783	E1BLI9	5	25	no	no	3	4.0931e-26	139.74	matching	matching	matching	matching	matching	matching	matching	matching
MSSINADFAFNLYR	QQNATLYKMSSINADF	DFAFNLYRRFTVEIPD	K	M	S	Y	R	R	2	1	2	1	0	0	0	0	0	1	1	0	1	2	0	2	0	0	1	0	0	14	0	1647.77	Q9TT36;Q3SYR0;CON__Q9TT36	Q9TT36	40	53	yes	no	2	2.4055e-05	136.6	matching	matching	matching	matching	matching	matching	matching	matching
MSTEQMQPLELSEDR	________________	PLELSEDRLDKLDPRC	M	M	S	D	R	L	0	1	0	1	0	2	3	0	0	0	2	0	2	0	1	2	1	0	0	0	0	15	0	1792.8	F1N1Q9	F1N1Q9	2	16	yes	yes	2	0.001125	86.738	matching	matching	matching	matching	matching	matching	matching	MS/MS
MSTITGPVPR	IQYLPLIKMSTITGPV	TITGPVPREFKSQLQE	K	M	S	P	R	E	0	1	0	0	0	0	0	1	0	1	0	0	1	0	2	1	2	0	0	1	0	10	0	1057.56	P02672;CON__P02672;A5PJE3	P02672	229	238	yes	no	2	1.0852e-05	147.73	matching	matching	matching	matching	matching	MS/MS	matching	MS/MS
MTDEEQLYTQLKNLVQK				M	T	Q	K		0	0	1	1	0	3	2	0	0	0	3	2	1	0	0	0	2	0	1	1	0	17	1	2080.05		REV__E1BKC4			yes	yes	2	0.019954	62.525	matching	matching	matching	matching	matching	matching	matching	matching
MTGSGIYAPDSPR	NLHYPLKKMTGSGIYA	IYAPDSPRAFHYDMKT	K	M	T	P	R	A	1	1	0	1	0	0	0	2	0	1	0	0	1	0	2	2	1	0	1	0	0	13	0	1350.62	Q58CQ9	Q58CQ9	275	287	yes	yes	2	0.0001748	130.19	matching	matching	matching	matching	matching	MS/MS	matching	matching
MTGSGIYAPDSPRAFHYDMK	NLHYPLKKMTGSGIYA	RAFHYDMKTEEGKLLL	K	M	T	M	K	T	2	1	0	2	0	0	0	2	1	1	0	1	2	1	2	2	1	0	2	0	0	20	1	2243.01	Q58CQ9	Q58CQ9	275	294	yes	yes	3	0.027013	41.422	matching	matching	matching	matching	matching	matching	matching	matching
MTGSNFDASSFNPHGISTFTDEDNTVYLLVVSHPDVK	DPTVLELKMTGSNFDA	VVSHPDVKSTVELFKF	K	M	T	V	K	S	1	0	3	4	0	0	1	2	2	1	2	1	1	3	2	5	4	0	1	4	0	37	0	4040.87	Q2KIW1	Q2KIW1	102	138	yes	yes	4	0.029986	23.045	matching	matching	matching	matching	matching	matching	matching	matching
MTNPAIQNDFSYYR	TLRFDELKMTNPAIQN	QNDFSYYRRTLSRMRI	K	M	T	Y	R	R	1	1	2	1	0	1	0	0	0	1	0	0	1	1	1	1	1	0	2	0	0	14	0	1718.77	Q2KJI3	Q2KJI3	147	160	yes	yes	2	3.1085e-05	137.73	matching	matching	matching	matching	matching	matching	matching	matching
MVETTAYALLTNLNLK	VPNTGTARMVETTAYA	LLTNLNLKDMNYVNPV	R	M	V	L	K	D	2	0	2	0	0	0	1	0	0	0	4	1	1	0	0	0	3	0	1	1	0	16	0	1793.96	F1MY85;CON__Q1A7A4	F1MY85	1247	1262	no	no	3	0.00015216	117.48	matching	matching	matching	matching	matching	matching	matching	matching
MVLETFGGDGHAR	LLEMQQTKMVLETFGG	FGGDGHARGDSVSQGT	K	M	V	A	R	G	1	1	0	1	0	0	1	3	1	0	1	0	1	1	0	0	1	0	0	1	0	13	0	1388.65	P02672;CON__P02672;A5PJE3	P02672	262	274	yes	no	2;3	5.1237e-206	204.32	matching	MS/MS	matching	matching	MS/MS	MS/MS	matching	MS/MS
MVSGFIPLKPTVK	NMAIVDVKMVSGFIPL	IPLKPTVKMLERSNVS	K	M	V	V	K	M	0	0	0	0	0	0	0	1	0	1	1	2	1	1	2	1	1	0	0	2	0	13	1	1415.82	Q7SIH1;CON__ENSEMBL:ENSBTAP00000024146	Q7SIH1	1422	1434	yes	no	2;3	0.013746	119.87	matching	matching	matching	MS/MS	matching	matching	matching	matching
MVSQHNLISGATLINER	GSFPWQAKMVSQHNLI	GATLINERWLLTTAKN	K	M	V	E	R	W	1	1	2	0	0	1	1	1	1	2	2	0	1	0	0	2	1	0	0	1	0	17	0	1881.97	Q2TBU0;G3X6K8	Q2TBU0	174	190	yes	no	2;3	3.7603e-255	212.41	matching	MS/MS	MS/MS	MS/MS	MS/MS	MS/MS	matching	matching
MVVESAYEVIK	ENWKEVHKMVVESAYE	ESAYEVIKLKGYTNWA	K	M	V	I	K	L	1	0	0	0	0	0	2	0	0	1	0	1	1	0	0	1	0	0	1	3	0	11	0	1266.65	Q5E9B1	Q5E9B1	234	244	yes	yes	2	3.6107e-34	155.33	matching	matching	matching	matching	matching	MS/MS	matching	matching
MWVTGVVTQGASR	IQVNLMRKMWVTGVVT	VVTQGASRAGSAEYLK	K	M	W	S	R	A	1	1	0	0	0	1	0	2	0	0	0	0	1	0	0	1	2	1	0	3	0	13	0	1390.7	Q95114;F1MXX6	Q95114	175	187	yes	no	2	0.0019241	121.92	matching	MS/MS	matching	matching	matching	matching	matching	matching
[truncated: 979 more rows]
[truncated: 127 more columns]

## Sheet: proteins
Protein IDs	Majority protein IDs	Peptide counts all	Peptide counts razor unique	Peptide counts unique	Fasta headers	Number of proteins	Peptides	Razor unique peptides	Unique peptides	Peptides 1334LH0	Peptides 1334LH312	Peptides 1334LH36	Peptides 1334LH42	Peptides 1334LH57	Peptides 1334LH81	Peptides 1831LH0	Peptides 1831LH312	Peptides 1831LH36	Peptides 1831LH42	Peptides 1831LH57	Peptides 1831LH81	Peptides 2071RH0	Peptides 2071RH312	Peptides 2071RH36	Peptides 2071RH42	Peptides 2071RH57	Peptides 2071RH81	Peptides 27LH0	Peptides 27LH312	Peptides 27LH36	Peptides 27LH42	Peptides 27LH57	Peptides 27LH81	Peptides 281RH0	Peptides 281RH312	Peptides 281RH36	Peptides 281RH42	Peptides 281RH57	Peptides 281RH81	Peptides 812RH0	Peptides 812RH312	Peptides 812RH36	Peptides 812RH42	Peptides 812RH57	Peptides 812RH81	Peptides blankclean1	Peptides blankclean2	Peptides blankclean3	Peptides blankclean4
[truncated: 570 more rows]
[truncated: 354 more columns]
